# Supplementary material for: First-in-Class Colchicine-Based Visible Light Photoswitchable Microtubule Dynamics Disrupting Agent
Source: MDPI journal article supplement (doi:10.3390/cells12141866), 2023-07-16
Supplement: s1 [file s1]

# **First-in-class colchicine-based visible light photoswitchable microtubule dynamics disrupting agent.**

**Filip Borys <sup>1,2,\*</sup>, Piotr Tobiasz <sup>1</sup>, Hanna Fabczak <sup>2</sup>, Ewa Joachimiak <sup>2</sup> and Hanna Krawczyk <sup>1,\*</sup>**

<sup>1</sup> Department of Organic Chemistry, Faculty of Chemistry, Warsaw University of Technology, Noakowskiego 3 Street, 00-664 Warsaw, Poland

<sup>2</sup> Nencki Institute of Experimental Biology, Polish Academy of Sciences, 3 Pasteur Street, 02-093 Warsaw, Poland

\* Correspondence: filip.borys@pw.edu.pl; hanna.krawczyk@pw.edu.pl

## **Supporting Information**

### **Table of Contents**

- 1. Chemistry: General information and general procedures**
- 2. Characterization of obtained compounds**
- 3. NMR & UV-VIS Data – Photostationary State (PSS) Analysis, Photoswitching and Half-Life Determination**
- 4. Biological assays**
- 5. Copies of NMR spectra**
- 6. Computational calculations**

# CHEMISTRY

## General Information

Unless otherwise stated, all the chemicals were obtained from commercial supplier and were used without other purification. The solvents were of analytical grade and if needed dried and distilled before use. All of the reactions were monitored by TLC on Merck silica gel plates 60 F254. All compounds were purified by column chromatography on Merck silica gel 60/230– 400 mesh or by flash chromatography. All the spectra were recorded using a Varian VNMRS spectrometer operating at 11.7 T and Varian Mercury VX 9.4 T magnetic field. The residual signals of DMSO-*d*<sub>6</sub> (2.54 ppm) in the <sup>1</sup>H NMR and the DMSO-*d*<sub>6</sub> signal (39.52 ppm) in the <sup>13</sup>C NMR spectra were used as the chemical shift references. In the <sup>19</sup>F NMR the CF<sub>3</sub>CO<sub>2</sub>H signal (-76.55 ppm) was used as the chemical shift references. Coupling constants are reported in Hertz. All the proton spectra were recorded using the standard spectrometer software and parameters. High resolution mass spectrometry (HRMS) spectra were recorded on a QExactive mass spectrometer (Thermo Fisher Scientific). (*R*)-*N*-deacetyl colchicine was synthesized according to protocol published earlier [3].

## General procedure A:

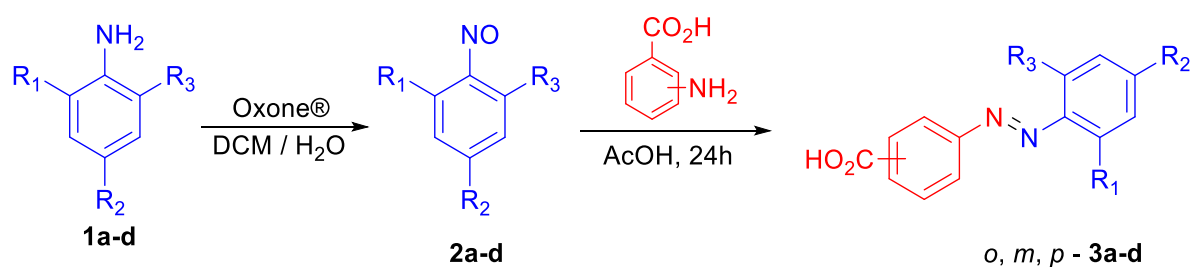

**Scheme S1.** The synthetic pathway towards compounds *o*-, *m*-, *p*-**3a-d**.

To the solution of aniline derivative **1a-d** (1mmol) in dichloromethane (20 mL) the aqueous solution (35 mL) of oxone® (3.5 mmol) was added dropwise. The reaction mixture was vigorously stirred at room temperature under argon. After disappearance of starting material (analysed by TLC), the reaction was quenched by addition of NaHCO<sub>3</sub>. After separation, aqueous phase was extracted with DCM twice. The combined organic layers were dried over MgSO<sub>4</sub> and concentrated in vacuum. The residue containing nitrosoarene **2a-d** was dissolved in acetic acid (50 mL) and appropriate isomer of aminobenzoic acid (1 mmol) was added. The reaction was stirred at room temperature for 24 h and then poured into water. The crude product was collected by filtration and recrystallized from ethyl acetate to afford the analytically pure product. For soluble products, the solvent was evaporated and the residue was subjected to column chromatography with 1% of acetic acid in DCM used as eluent.

## General procedure B:

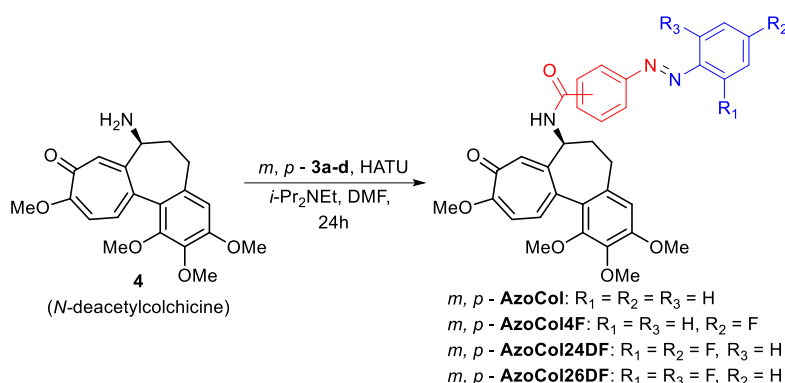

### Scheme S2. The synthetic pathway towards compounds *m*-, *p*-AzoCols

A solution of appropriate azobenzene *m*-, *p*-**3a-d** obtained from procedure A (0.3 mmol) in DMF (5 mL) was added to (*R*)-*N*-deacetyl colchicine (0.15 mmol), HATU (0.15 mmol) and DIPEA (0.9 mmol) under argon atmosphere. The mixture was stirred at room temperature for 4 h and then diluted with ice-cooled water and extracted with ethyl acetate (2 × 40 mL). Combined organic layers were washed with brine dried over MgSO<sub>4</sub> and evaporated under reduced pressure. The residue was purified by silica gel column chromatography (DCM/MeOH 9:1).

## General procedure C:

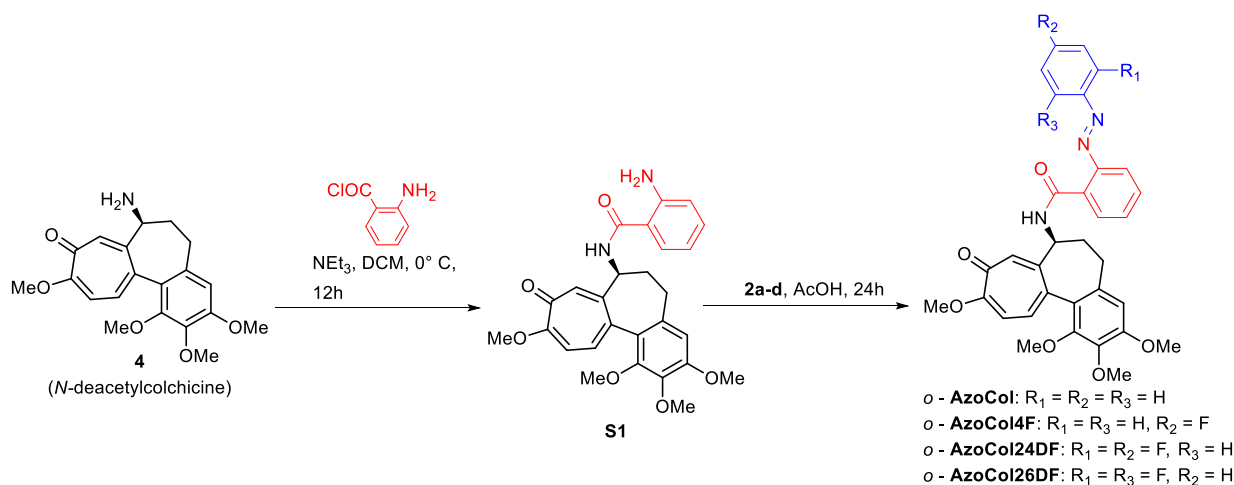

### Scheme S3. The synthetic pathway towards compounds *o*-AzoCols

To a solution of 2-aminobenzoic acid (1.05 mmol) in toluene (5 mL) thionyl chloride (5.0 mmol) was added and the mixture was refluxed for 4 h. Next, the solvent was evaporated under reduced pressure to obtain the crude acid chloride as yellow oil, which was used immediately in the next step without any purification. To a solution of (*R*)-*N*-deacetyl colchicine (1.0 mmol) in DCM (10 mL) was added Et<sub>3</sub>N (1.05 mmol) at 0°C and stirred for 15 min. To this mixture, the solution of acid chloride in methylene chloride (5 mL) was added dropwise at 0°C and stirred overnight. Thereafter, the solvent was removed under reduced pressure and the residue was purified by column chromatography (ethyl acetate/acetone 4:1) to afford intermediate **S1**. In subsequent reaction nitrosobenzenes **2a-d** (obtained as in general procedure A, 0.2 mmol) was dissolved in acetic acid (5 mL) and intermediate **S1** (0.15 mmol) was added in DCM (5 mL). Reaction was stirred at room temperature for 24 h and then solvent was evaporated. The residue was dissolved in ethyl acetate (10 mL) and washed with NaHCO<sub>3</sub> (2 × 2 mL) water (2 mL) and dried over MgSO<sub>4</sub> and concentrated in vacuum. The product was purified by silica gel column chromatography (DCM/MeOH 95:5).

## Characterization of obtained compounds:

### (*E*)-2-(phenyldiazenyl)benzoic acid (*o*-**3a**)

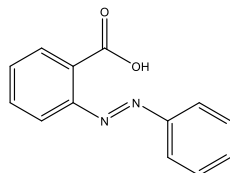

Compound *o*-**3a** was obtained according to general procedure A in 44% yield

**TLC:** R<sub>f</sub> = 0.40 (DCM),

**<sup>1</sup>H NMR** (500 MHz, DMSO-*d*<sub>6</sub>) δ 13.14 (bs, 1H), 7.87 – 7.84 (m, 2H), 7.80 (dd, *J* = 7.6, 1.4 Hz, 1H), 7.70 – 7.65 (td *J* = 7.5, 1.5 Hz, 1H), 7.65 – 7.54 (m, 5H).

**<sup>13</sup>C NMR** (126 MHz, DMSO-*d*<sub>6</sub>) δ 168.2 (s), 152.0 (s), 150.8 (s), 131.8 (s), 131.7 (s), 130.4 (s), 130.4 (s), 129.5 (s), 129.2 (s), 122.7 (s), 118.0 (s).

**HRMS** (HESI): *m/z* 227.0815 [227.0815 calcd. for C<sub>13</sub>H<sub>11</sub>N<sub>2</sub>O<sub>2</sub><sup>+</sup> (M+H<sup>+</sup>)].

### (*E*)-2-((4-fluorophenyl)diazenyl)benzoic acid (*o*-**3b**)

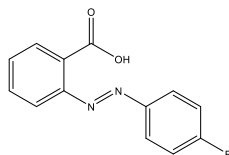

Compound *o*-**3b** was obtained according to general procedure A in 37% yield

**TLC:** R<sub>f</sub> = 0.47 (DCM),

**<sup>1</sup>H NMR** (500 MHz, DMSO-*d*<sub>6</sub>) δ 13.15 (s, 1H), 7.95 – 7.90 (m, 2H), 7.80 (dd, *J* = 7.6, 1.2 Hz, 1H), 7.70 (td *J* = 7.5, 1.5 Hz, 1H), 7.60 (td, *J* = 7.5, 1.3 Hz, 1H), 7.55 (dd, *J* = 7.9, 1.0 Hz, 1H), 7.49 – 7.43 (m, 2H).

**<sup>13</sup>C NMR** (126 MHz, DMSO-*d*<sub>6</sub>) δ 168.2 (s), 164.0 (d, *J* = 250.4 Hz), 150.7 (s), 148.8 (d, *J* = 2.8 Hz), 131.7 (s), 130.5 (s), 130.4 (s), 129.3 (s), 125.1 (d, *J* = 9.6 Hz), 118.0 (s), 116.5 (d, *J* = 23.1 Hz).

**<sup>19</sup>F NMR** (470 MHz, DMSO-*d*<sub>6</sub>) δ -111.9 (tt, *J* = 8.6, 5.3 Hz).

**HRMS** (HESI): *m/z* 245.0720 [245.0721 calcd. for C<sub>13</sub>H<sub>11</sub>N<sub>2</sub>O<sub>2</sub><sup>+</sup> (M+H<sup>+</sup>)].

### (*E*)-2-((2,4-difluorophenyl)diazenyl)benzoic acid (*o*-**3c**)

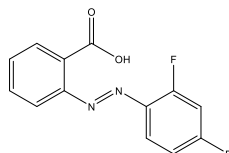

Compound *o*-**3c** was obtained according to general procedure A in 28% yield

**TLC:** R<sub>f</sub> = 0.31 (DCM),

**<sup>1</sup>H NMR** (500 MHz, DMSO-*d*<sub>6</sub>) δ 13.19 (s, 1H), 7.85 – 7.80 (m, 1H), 7.72 (td, *J* = 8.9, 6.4 Hz, 1H), 7.70 – 7.66 (m, 1H), 7.64 – 7.56 (m, 2H), 7.55 – 7.51 (m, 1H), 7.28 (dddd, *J* = 9.2, 8.2, 2.7, 1.3 Hz, 1H).



**<sup>13</sup>C NMR** (126 MHz, DMSO-d<sub>6</sub>) δ 168.0 (s), 164.4 (dd, *J* = 252.9, 12.0 Hz), 159.9 (dd, *J* = 259.0, 13.1 Hz), 150.9 (s), 137.1 (dd, *J* = 7.1, 3.8 Hz), 131.8 (s), 130.8 (s), 130.6 (s), 129.4 (s), 119.5 (dd, *J* = 10.8, 1.2 Hz), 118.0 (s), 112.7 (dd, *J* = 23.0, 3.7 Hz), 105.7 (dd, *J* = 26.7, 23.8 Hz).

**<sup>19</sup>F NMR** (470 MHz, DMSO-d<sub>6</sub>) δ -107.4 (tdd, *J* = 17.3, 9.2, 6.5 Hz), -123.1 (dt, *J* = 19.6, 9.2 Hz).

**HRMS** (HESI): *m/z* 263.0626 [263.0627 calcd. for C<sub>13</sub>H<sub>11</sub>N<sub>2</sub>O<sub>2</sub><sup>+</sup> (*M*+*H*<sup>+</sup>)].

(*E*)-2-((2,6-difluorophenyl)diazenyl)benzoic acid (*o*-**3d**)

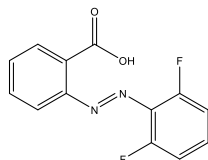

Compound *o*-**3d** was obtained according to general procedure A in 34% yield

**TLC**: *R<sub>f</sub>* = 0.39 (DCM),

**<sup>1</sup>H NMR** (500 MHz, DMSO-d<sub>6</sub>) δ 13.15 (bs, 1H), 7.80 (dd, *J* = 7.3, 1.7 Hz, 1H), 7.71 – 7.57 (m, 3H), 7.55 – 7.51 (m, 1H), 7.38 – 7.31 (m, 2H).

**<sup>13</sup>C NMR** (126 MHz, DMSO-d<sub>6</sub>) δ 168.0 (s), 154.9 (dd, *J* = 258.5, 4.2 Hz), 151.0 (s), 132.5 (t, *J* = 10.5 Hz), 131.6 (s), 131.4 (s), 130.9 (s), 130.1 (t, *J* = 10.1 Hz), 129.2 (s), 117.8 (s), 113.1 (dd, *J* = 19.7, 3.8 Hz).

**<sup>19</sup>F NMR** (470 MHz, DMSO-d<sub>6</sub>) δ -125.0 (dd, *J* = 9.4, 6.3 Hz).

**HRMS** (HESI): *m/z* 263.0625 [263.0627 calcd. for C<sub>13</sub>H<sub>11</sub>N<sub>2</sub>O<sub>2</sub><sup>+</sup> (*M*+*H*<sup>+</sup>)].

(*E*)-3-(phenyldiazenyl)benzoic acid (*m*-**3a**)

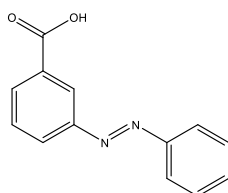

Compound *m*-**3a** was obtained according to general procedure A in 38% yield

**TLC**: *R<sub>f</sub>* = 0.22 (DCM),

**<sup>1</sup>H NMR** (500 MHz, DMSO-d<sub>6</sub>) δ 13.29 (bs, 1H), 8.38 (t, *J* = 1.6 Hz, 1H), 8.16 (ddd, *J* = 7.9, 2.0, 1.2 Hz, 1H), 8.13 (ddd, *J* = 7.7, 1.6, 1.2 Hz, 1H), 7.98 – 7.90 (m, 2H), 7.75 (t, *J* = 7.8 Hz, 1H), 7.67 – 7.57 (m, 3H).

**<sup>13</sup>C NMR** (126 MHz, DMSO-d<sub>6</sub>) δ 166.6 (s), 151.9 (s), 151.8 (s), 132.1 (s), 132.0 (s), 131.8 (s), 123.0 (s), 129.5 (s), 127.4 (s), 122.7 (s), 122.2 (s).

**HRMS** (HESI): *m/z* 227.0813 [227.0815 calcd. for C<sub>13</sub>H<sub>11</sub>N<sub>2</sub>O<sub>2</sub><sup>+</sup> (*M*+*H*<sup>+</sup>)].

(*E*)-3-((4-fluorophenyl)diazenyl)benzoic acid (*m*-**3b**)

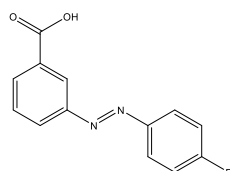

Compound *m*-**3b** was obtained according to general procedure A in 17% yield

**TLC**: *R<sub>f</sub>* = 0.10 (DCM),

**<sup>1</sup>H NMR** (500 MHz, DMSO-d<sub>6</sub>) δ 13.33 (s, 1H), 8.42 – 8.31 (m, 1H), 8.17 – 8.08 (m, 2H), 8.07 – 7.98 (m, 2H), 7.74 (t, *J* = 7.8 Hz, 1H), 7.50 – 7.40 (m, 2H).

**<sup>13</sup>C NMR** (126 MHz, DMSO-d<sub>6</sub>) δ 166.6 (s), 164.1 (d, *J* = 250.4 Hz), 151.7 (s), 148.6 (d, *J* = 2.9 Hz), 132.2 (s), 131.9 (s), 130.0 (s), 127.3 (s), 125.2 (d, *J* = 9.4 Hz), 122.2 (s), 116.5 (d, *J* = 23.0 Hz).

**<sup>19</sup>F NMR** (470 MHz, DMSO-d<sub>6</sub>) δ -111.7 (tt, *J* = 8.5, 5.4 Hz).

**HRMS** (HESI):  $m/z$  245.0720 [245.0721 calcd. for  $C_{13}H_{10}FN_2O_2^+$  ( $M+H^+$ )].

(*E*)-3-((2,4-difluorophenyl)diazenyl)benzoic acid (*m*-**3c**)

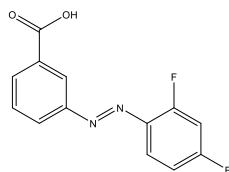

Compound *m*-**3c** was obtained according to general procedure A in 32% yield

**TLC**:  $R_f$  = 0.11 (DCM),

**$^1H$  NMR** (500 MHz, DMSO- $d_6$ )  $\delta$  13.36 (bs, 1H), 8.36 (t,  $J$  = 1.7 Hz, 1H), 8.18 – 8.11 (m, 2H), 7.86 (td,  $J$  = 8.9, 6.4 Hz, 1H), 7.75 (t,  $J$  = 7.8 Hz, 1H), 7.64 – 7.56 (m, 1H), 7.31 – 7.23 (m, 1H).

**$^{13}C$  NMR** (101 MHz, DMSO)  $\delta$  166.9 (s), 164.7 (dd,  $J$  = 253.2, 12.1 Hz), 160.2 (dd,  $J$  = 259.3, 13.1 Hz), 152.1 (s), 137.0 (dd,  $J$  = 6.7, 3.9 Hz), 132.5 (s), 132.3 (s), 130.2 (s), 127.7 (s), 122.7 (s), 119.4 (d,  $J$  = 10.8 Hz), 112.7 (dd,  $J$  = 22.9, 3.1 Hz), 105.7 (t,  $J$  = 26.0 Hz).

**$^{19}F$  NMR** (470 MHz, DMSO- $d_6$ )  $\delta$  -107.3 (tdd,  $J$  = 17.3, 9.3, 6.5 Hz), -122.9 (dt,  $J$  = 18.9, 9.3 Hz).

**HRMS** (HESI):  $m/z$  263.0625 [263.0627 calcd. for  $C_{13}H_9F_2N_2O_2^+$  ( $M+H^+$ )].

(*E*)-3-((2,6-difluorophenyl)diazenyl)benzoic acid (*m*-**3d**)

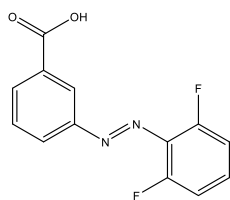

Compound *m*-**3d** was obtained according to general procedure A in 27% yield

**TLC**:  $R_f$  = 0.11 (DCM),

**$^1H$  NMR** (500 MHz, DMSO- $d_6$ )  $\delta$  13.39 (s, 1H), 8.33 (t,  $J$  = 1.8 Hz, 1H), 8.20 – 8.16 (m, 1H), 8.14 (ddd,  $J$  = 7.9, 2.1, 1.2 Hz, 1H), 7.77 (t,  $J$  = 7.8 Hz, 1H), 7.61 (tt,  $J$  = 8.5, 6.1 Hz, 1H), 7.40 – 7.32 (m, 2H).

**$^{13}C$  NMR** (126 MHz, DMSO- $d_6$ )  $\delta$  167.1 (s), 155.3 (dd,  $J$  = 258.0, 3.6 Hz), 152.8 (s), 133.2 (s), 132.8 (t,  $J$  = 10.5 Hz), 132.5 (s), 130.6 (s), 130.5 (t,  $J$  = 10.1 Hz), 127.81 (s), 122.38 (s), 114.43 – 112.33 (dd,  $J$  = 19.8, 3.3 Hz).

**$^{19}F$  NMR** (470 MHz, DMSO- $d_6$ )  $\delta$  -125.2 (dd,  $J$  = 9.5, 6.1 Hz).

**HRMS** (HESI):  $m/z$  263.0625 [263.0627 calcd. for  $C_{13}H_9F_2N_2O_2^+$  ( $M+H^+$ )].

(*E*)-4-(phenyldiazenyl)benzoic acid (*p*-**3a**)

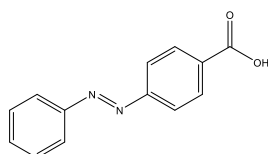

Compound *p*-**3a** was obtained according to general procedure A in 43% yield

**TLC**:  $R_f$  = 0.24 (DCM),

**$^1H$  NMR** (500 MHz, DMSO- $d_6$ )  $\delta$  13.25 (bs, 1H), 8.15 (d,  $J$  = 8.7 Hz, 2H), 7.97 (d,  $J$  = 8.6 Hz, 2H), 7.94 (m, 2H), 7.66 – 7.59 (m, 3H).

**<sup>13</sup>C NMR** (101 MHz, DMSO) δ 166.8 (s), 154.3 (s), 151.9 (s), 132.9 (s), 132.3 (s), 130.7 (s), 129.6 (s), 122.9 (s), 122.6 (s).

**HRMS** (HESI): m/z 227.0814 [227.0815 calcd. for C<sub>13</sub>H<sub>11</sub>N<sub>2</sub>O<sub>2</sub><sup>+</sup> (M+H<sup>+</sup>)].

(*E*)-4-((4-fluorophenyl)diazenyl)benzoic acid (*p*-**3b**)

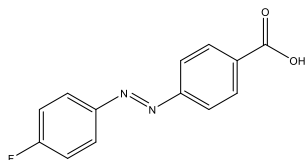

Compound *p*-**3b** was obtained according to general procedure A in 61% yield

**TLC**: R<sub>f</sub> = 0.12 (DCM),

**<sup>1</sup>H NMR** (400 MHz, DMSO) δ 8.14 (d, *J* = 8.4 Hz, 2H), 8.04 – 7.99 (m, 2H), 7.96 (d, *J* = 8.4 Hz, 2H), 7.50 – 7.43 (m, 2H).

**<sup>13</sup>C NMR** (101 MHz, DMSO) δ 166.7 (s), 164.3 (d, *J* = 251.1 Hz), 154.1 (s), 148.7 (d, *J* = 2.6 Hz), 132.9 (s), 130.7 (s), 125.3 (d, *J* = 9.3 Hz), 122.6 (s), 116.7 (d, *J* = 23.1 Hz).

**<sup>19</sup>F NMR** (470 MHz, DMSO-*d*<sub>6</sub>) δ -111.28 (tt, *J* = 8.5, 5.3 Hz).

**HRMS** (HESI): m/z 245.0721 [245.0721 calcd. for C<sub>13</sub>H<sub>10</sub>FN<sub>2</sub>O<sub>2</sub><sup>+</sup> (M+H<sup>+</sup>)].

(*E*)-4-((2,4-difluorophenyl)diazenyl)benzoic acid (*p*-**3c**)

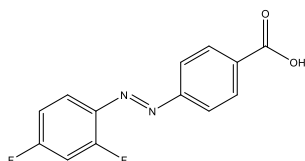

Compound *p*-**3c** was obtained according to general procedure A in 55% yield

**TLC**: R<sub>f</sub> = 0.18 (DCM),

**<sup>1</sup>H NMR** (400 MHz, DMSO) δ 8.14 (d, *J* = 8.5 Hz, 2H), 7.95 (d, *J* = 8.4 Hz, 2H), 7.85 (td, *J* = 9.0, 6.5 Hz, 1H), 7.65 – 7.57 (m, 1H), 7.31 – 7.23 (m, 1H).

**<sup>13</sup>C NMR** (101 MHz, DMSO) δ 166.8 (s), 164.8 (dd, *J* = 253.6, 12.1 Hz), 160.3 (dd, *J* = 259.5, 13.2 Hz), 154.4 (s), 137.2 (dd, *J* = 6.7, 3.9 Hz), 133.4 (s), 130.9 (s), 122.9 (s), 119.5 (d, *J* = 10.7 Hz), 112.9 (dd, *J* = 23.0, 3.4 Hz), 105.9 (dd, *J* = 26.7, 23.9 Hz).

**<sup>19</sup>F NMR** (470 MHz, DMSO-*d*<sub>6</sub>) δ -106.8 (tdd, *J* = 17.0, 9.6, 6.5 Hz), -122.5 (dt, *J* = 19.1, 9.6 Hz).

**HRMS** (HESI): m/z 263.0628 [263.0627 calcd. for C<sub>13</sub>H<sub>9</sub>F<sub>2</sub>N<sub>2</sub>O<sub>2</sub><sup>+</sup> (M+H<sup>+</sup>)].

(*E*)-4-((2,6-difluorophenyl)diazenyl)benzoic acid (*p*-**3d**)

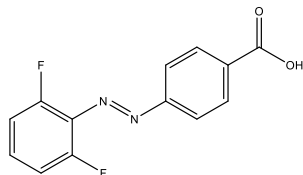

Compound *p*-**3d** was obtained according to general procedure A in 65% yield

**TLC**: R<sub>f</sub> = 0.20 (DCM),

**<sup>1</sup>H NMR** (500 MHz, DMSO-*d*<sub>6</sub>) δ 8.16 (d, *J* = 8.6 Hz, 2H), 7.95 (d, *J* = 8.6 Hz, 2H), 7.62 (tt, *J* = 8.4, 6.1 Hz, 1H), 7.43 – 7.33 (m, 2H).

**<sup>13</sup>C NMR** (126 MHz, DMSO-d<sub>6</sub>) δ 166.7 (s), 155.0 (dd, *J* = 258.5, 4.0 Hz), 154.8 (s), 133.8 (s), 132.8 (t, *J* = 10.6 Hz), 130.8 (s), 130.3 (t, *J* = 9.9 Hz), 122.6 (s), 113.2 (dd, *J* = 19.7, 3.6 Hz).

**<sup>19</sup>F NMR** (470 MHz, DMSO-d<sub>6</sub>) δ -124.9 (dd, *J* = 9.5, 6.2 Hz).

**HRMS** (HESI<sup>+</sup>): *m/z* 263.0626 [263.0627 calcd. for C<sub>13</sub>H<sub>9</sub>F<sub>2</sub>N<sub>2</sub>O<sub>2</sub> (M+H<sup>+</sup>)].

(S,E)-2-(phenyldiazenyl)-N-(1,2,3,10-tetramethoxy-9-oxo-5,6,7,9-tetrahydrobenzo[a]heptalen-7-yl)benzamide (*o*-**AzoCol**)

Compound *o*-**AzoCol** was obtained according to general procedure C in 30% yield

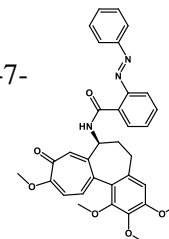

**TLC:** R<sub>f</sub> = 0.64 (DCM/MeOH 9:1),

**<sup>1</sup>H NMR** (500 MHz, DMSO-d<sub>6</sub>) δ 9.18 (d, *J* = 7.3 Hz, 1H), 7.83 – 7.75 (m, 2H), 7.72 – 7.68 (m, 1H), 7.65 – 7.49 (m, 6H), 7.36 (s, 1H), 7.16 (d, *J* = 10.6 Hz, 1H), 7.06 (d, *J* = 11.1 Hz, 1H), 6.82 (s, 1H), 4.61 (dt, *J* = 12.0, 6.9 Hz, 1H), 3.90 (s, 3H), 3.86 (s, 3H), 3.81 (s, 3H), 3.59 (s, 3H), 2.68 – 2.60 (m, 1H), 2.31 – 2.20 (m, 1H), 2.16 – 2.09 (m, 1H), 2.00 – 1.87 (m, 1H).

**<sup>13</sup>C NMR** (126 MHz, DMSO-d<sub>6</sub>) δ 178.1 (s), 166.6 (s), 163.6 (s), 153.0 (s), 151.9 (s), 150.5 (s), 150.4 (s), 148.8 (s), 140.8 (s), 136.2 (s), 135.1 (s), 134.4 (s), 134.3 (s), 131.7 (s), 131.1 (s), 130.7 (s), 130.4 (s), 129.4 (s), 128.7 (s), 125.5 (s), 122.9 (s), 116.3 (s), 112.0 (s), 107.8 (s), 60.9 (s), 60.7 (s), 56.1 (s), 55.9 (s), 52.2 (s), 35.8 (s), 29.3 (s).

**HRMS** (HESI): *m/z* 566.2290 [*m/z*: 566.2286 calcd. for C<sub>33</sub>H<sub>32</sub>N<sub>3</sub>O<sub>6</sub><sup>+</sup> (M+H<sup>+</sup>)].

(S,E)-2-((4-fluorophenyl)diazenyl)-N-(1,2,3,10-tetramethoxy-9-oxo-5,6,7,9-tetrahydrobenzo[a]heptalen-7-yl)benzamide *o*-**AzoCol4F**

Compound *o*-**AzoCol4F** was obtained according to general procedure C in 36% yield

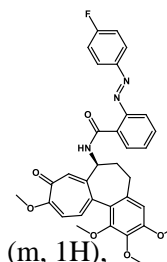

**TLC:** R<sub>f</sub> = 0.59 (DCM/MeOH 9:1),

**<sup>1</sup>H NMR** (500 MHz, DMSO-d<sub>6</sub>) δ 9.17 (d, *J* = 7.3 Hz, 1H), 7.90 – 7.81 (m, 2H), 7.71 – 7.67 (m, 1H), 7.65 – 7.58 (m, 3H), 7.37 – 7.32 (m, 1H), 7.17 (d, *J* = 10.6 Hz, 1H), 7.06 (d, *J* = 11.1 Hz, 1H), 6.81 (s, 1H), 4.61 (dt, *J* = 11.9, 6.9 Hz, 1H), 3.91 (s, 3H), 3.86 (s, 3H), 3.81 (s, 3H), 3.60 (s, 3H), 2.63 (dd, *J* = 13.1, 6.0 Hz, 1H), 2.31 – 2.21 (m, 1H), 2.17 – 2.06 (m, 1H), 1.98 – 1.90 (m, 1H).

**<sup>19</sup>F NMR** (470 MHz, DMSO-d<sub>6</sub>) δ -111.99 (tt, *J* = 8.6, 5.3 Hz).

**<sup>13</sup>C NMR** (126 MHz, DMSO-d<sub>6</sub>) δ 178.1 (s), 166.6 (s), 163.9 (d, *J* = 250.4 Hz), 163.6 (s), 153.0 (s), 150.5 (s), 150.5 (s), 148.7 (d, *J* = 2.7 Hz), 148.7 (s), 140.8 (s), 136.4 (s), 135.2 (s), 134.4 (s), 134.3 (s), 131.1 (s), 130.7 (s), 130.4 (s), 128.7 (s), 125.4 (s), 125.3 (d, *J* = 9.3 Hz), 116.3 (d, *J* = 23.0 Hz), 116.1 (s), 112.1 (s), 107.8 (s), 60.9 (s), 60.7 (s), 56.0 (s), 55.9 (s), 52.2 (s), 35.8 (s), 29.3 (s).

**HRMS** (HESI): *m/z* 584.2194 [*m/z*: 584.2191 calcd. for C<sub>33</sub>H<sub>31</sub>FN<sub>3</sub>O<sub>6</sub><sup>+</sup> (M+H<sup>+</sup>)].

(S,E)-2-((2,4-difluorophenyl)diazenyl)-N-(1,2,3,10-tetramethoxy-9-oxo-5,6,7,9-tetrahydrobenzo[a]heptalen-7-yl)benzamide *o*-**AzoCol24DF**

Compound *o*-**AzoCol24DF** was obtained according to general procedure C in 41% yield

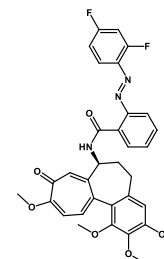

**TLC:** R<sub>f</sub> = 0.60 (DCM/MeOH 9:1),

**<sup>1</sup>H NMR** (500 MHz, DMSO-d<sub>6</sub>) δ 9.16 (d, *J* = 7.3 Hz, 1H), 7.69 – 7.58 (m, 4H), 7.58 – 7.52 (m, 1H), 7.32 (s, 1H), 7.16 (d, *J* = 10.6 Hz, 1H), 7.14 – 7.08 (m, 1H), 7.05 (d, *J* = 11.1 Hz, 1H), 6.81 (s, 1H), 4.61 (dt, *J* = 11.9, 6.9 Hz, 1H), 3.90 (s, 3H), 3.86 (s, 3H), 3.81 (s, 3H), 3.60 (s, 3H), 2.62 (dd, *J* = 13.2, 6.1 Hz, 1H), 2.29 – 2.19 (m, 1H), 2.17 – 2.07 (m, 1H), 1.98 – 1.89 (m, 1H).

**<sup>13</sup>C NMR** (126 MHz, DMSO-d<sub>6</sub>) δ 178.9 (s), 167.7 (s), 165.0 (dd, *J* = 253.5, 12.1 Hz), 164.2 (s), 160.5 (dd, *J* = 259.3, 13.1 Hz), 153.7 (s), 151.7 (s), 151.0 (s), 149.5 (s), 141.3 (s), 137.6 (dd, *J* = 6.8, 3.8 Hz), 136.7 (s), 136.2 (s),

135.6 (s), 135.0 (s), 132.4 (s), 131.3 (s), 131.0 (s), 129.2 (s), 125.9 (s), 120.2 (d,  $J = 10.6$  Hz), 116.9 (s), 113.2 (s), 113.0 (dd,  $J = 22.9, 3.3$  Hz), 108.4 (s), 106.0 (dd,  $J = 26.4, 24.0$  Hz), 61.6 (s), 61.4 (s), 56.7 (s), 56.5 (s), 53.0 (s), 36.3 (s), 29.7 (s).

$^{19}\text{F}$  NMR (470 MHz, DMSO- $d_6$ )  $\delta$  -107.47 – -107.59 (m), -123.04 (dt,  $J = 19.1, 9.3$  Hz).

HRMS (HESI):  $m/z$  602.2100 [ $m/z$ : 602.2097 calcd. for  $\text{C}_{33}\text{H}_{30}\text{F}_2\text{N}_3\text{O}_6^+$  ( $\text{M}+\text{H}^+$ )].

(*S,E*)-2-((2,6-difluorophenyl)diazenyl)-*N*-(1,2,3,10-tetramethoxy-9-oxo-5,6,7,9-tetrahydrobenzo[*a*]heptalen-7-yl)benzamide *o*-AzoCol26DF

Compound *o*-AzoCol26DF was obtained according to general procedure C in 35% yield

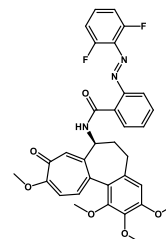

TLC:  $R_f = 0.61$  (DCM/MeOH 9:1),

$^1\text{H}$  NMR (500 MHz, DMSO- $d_6$ )  $\delta$  9.10 (d,  $J = 7.4$  Hz, 1H), 7.74 – 7.62 (m, 4H), 7.60 (tt,  $J = 8.5, 6.1$  Hz, 1H), 7.34 – 7.27 (m, 2H), 7.23 (s, 1H), 7.13 (d,  $J = 10.7$  Hz, 1H), 7.01 (d,  $J = 11.1$  Hz, 1H), 6.79 (s, 1H), 4.59 (dt,  $J = 11.9, 6.9$  Hz, 1H), 3.87 (s, 3H), 3.85 (s, 3H), 3.80 (s, 3H), 3.59 (s, 3H), 2.60 (dd,  $J = 13.2, 6.2$  Hz, 1H), 2.25 (td,  $J = 13.2, 7.1$  Hz, 1H), 2.12 – 2.00 (m, 1H), 1.94 – 1.85 (m, 1H).

$^{13}\text{C}$  NMR (126 MHz, DMSO- $d_6$ )  $\delta$  177.9 (s), 165.7 (s), 163.5 (s), 155.1 (dd,  $J = 259.1, 4.1$  Hz), 153.0 (s), 150.5 (s), 150.1 (s), 149.4 (s), 140.8 (s), 135.5 (s), 135.1 (s), 134.3 (s), 134.2 (s), 132.7 (t,  $J = 10.5$  Hz), 132.3 (s), 130.8 (s), 130.6 (s), 130.0 (dd,  $J = 19.6, 9.7$  Hz), 129.2 (s), 125.5 (s), 115.7 (s), 113.1 (dd,  $J = 19.8, 3.6$  Hz), 112.0 (s), 107.7 (s), 60.9 (s), 60.7 (s), 56.0 (s), 55.9 (s), 52.1 (s), 35.5 (s), 29.2 (s).

$^{19}\text{F}$  NMR (470 MHz, DMSO- $d_6$ )  $\delta$  -124.3 (dd,  $J = 9.6, 6.1$  Hz).

HRMS (HESI):  $m/z$  602.2100 [602.2097 calcd. for  $\text{C}_{33}\text{H}_{31}\text{FN}_3\text{O}_6^+$  ( $\text{M}+\text{H}^+$ )].

(*S,E*)-3-(phenyldiazenyl)-*N*-(1,2,3,10-tetramethoxy-9-oxo-5,6,7,9-tetrahydrobenzo[*a*]heptalen-7-yl)benzamide *m*-AzoCol

Compound *m*-AzoCol was obtained according to general procedure B in 53% yield

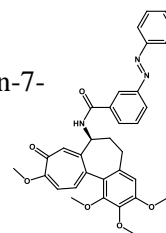

TLC:  $R_f = 0.64$  (DCM/MeOH 9:1),

$^1\text{H}$  NMR (500 MHz, DMSO- $d_6$ )  $\delta$  9.29 (d,  $J = 7.3$  Hz, 1H), 8.42 (t,  $J = 1.8$  Hz, 1H), 8.09 – 8.04 (m, 2H), 7.96 – 7.91 (m, 2H), 7.72 (t,  $J = 7.8$  Hz, 1H), 7.65 – 7.58 (m, 3H), 7.26 (s, 1H), 7.17 (d,  $J = 10.7$  Hz, 1H), 7.06 (d,  $J = 11.1$  Hz, 1H), 6.81 (s, 1H), 4.63 (dt,  $J = 9.8, 7.8$  Hz, 1H), 3.87 (s, 3H), 3.85 (s, 3H), 3.82 (s, 3H), 3.61 (s, 3H), 2.71 – 2.62 (m, 1H), 2.34 – 2.25 (m, 1H), 2.21 – 2.11 (m, 2H).

$^{13}\text{C}$  NMR (126 MHz, DMSO- $d_6$ )  $\delta$  177.9 (s), 165.0 (s), 163.6 (s), 153.0 (s), 151.9 (s), 151.8 (s), 150.7 (s), 150.5 (s), 140.8 (s), 135.2 (s), 135.1 (s), 134.6 (s), 134.3 (s), 131.9 (s), 130.4 (s), 130.3 (s), 129.7 (s), 129.6 (s), 125.5 (s), 125.2 (s), 122.7 (s), 121.5 (s), 112.2 (s), 107.8 (s), 61.0 (s), 60.7 (s), 56.1 (s), 55.9 (s), 52.3 (s), 35.2 (s), 29.3 (s).

HRMS (HESI):  $m/z$  566.2286 [566.2286 calcd. for  $\text{C}_{33}\text{H}_{31}\text{FN}_3\text{O}_6^+$  ( $\text{M}+\text{H}^+$ )].

(*S,E*)-3-((4-fluorophenyl)diazenyl)-*N*-(1,2,3,10-tetramethoxy-9-oxo-5,6,7,9-tetrahydrobenzo[*a*]heptalen-7-yl)benzamide *m*-AzoCol4F

Compound *m*-AzoCol4F was obtained according to general procedure B in 69% yield

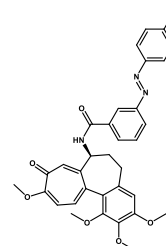

TLC:  $R_f = 0.62$  (DCM/MeOH 9:1),

$^1\text{H}$  NMR (500 MHz, DMSO- $d_6$ )  $\delta$  9.28 (d,  $J = 7.3$  Hz, 1H), 8.40 (t,  $J = 1.8$  Hz, 1H), 8.10 – 8.04 (m, 2H), 8.04 – 7.98 (m, 2H), 7.72 (t,  $J = 7.8$  Hz, 1H), 7.50 – 7.42 (m, 2H), 7.26 (s, 1H), 7.17 (d,  $J = 10.7$  Hz, 1H), 7.06 (d,  $J = 11.2$  Hz, 1H), 6.81 (s, 1H), 4.62 (dt,  $J = 9.7, 7.8$  Hz, 1H), 3.87 (s, 3H), 3.85 (s, 3H), 3.81 (s, 3H), 3.61 (s, 3H), 2.71 – 2.62 (m, 1H), 2.34 – 2.27 (m, 1H), 2.20 – 2.11 (m, 2H).

$^{13}\text{C}$  NMR (126 MHz, DMSO- $d_6$ )  $\delta$  178.0 (s), 165.0 (s), 164.1 (d,  $J = 250.6$  Hz), 163.6 (s), 153.0 (s), 151.7 (s), 150.7 (s), 150.6 (s), 148.7 (d,  $J = 3.0$  Hz), 140.8 (s), 135.3 (s), 135.1 (s), 134.6 (s), 134.3 (s),

130.4 (s), 130.3 (s), 129.7 (s), 125.5 (s), 125.2 (s), 125.1 (d,  $J = 9.3$  Hz), 121.5 (s), 116.6 (d,  $J = 23.1$  Hz), 112.3 (s), 107.9 (s), 61.0 (s), 60.8 (s), 56.1 (s), 55.9 (s), 52.4 (s), 35.3 (s), 29.3 (s).

$^{19}\text{F}$  NMR (470 MHz, DMSO- $d_6$ )  $\delta$  -111.8 (tt,  $J = 8.5, 5.3$  Hz).

HRMS (HESI):  $m/z$  584.2195 [584.2191 calcd. for  $\text{C}_{33}\text{H}_{31}\text{FN}_3\text{O}_6^+$  ( $\text{M}+\text{H}^+$ )].

(S,E)-3-((2,4-difluorophenyl)diazenyl)-N-(1,2,3,10-tetramethoxy-9-oxo-5,6,7,9-tetrahydrobenzo[a]heptalen-7-yl)benzamide ***m*-AzoCol24DF**

Compound ***m*-AzoCol24DF** was obtained according to general procedure B in 62% yield

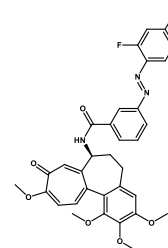

TLC:  $R_f = 0.57$  (DCM/MeOH 9:1),

$^1\text{H}$  NMR (500 MHz, DMSO- $d_6$ )  $\delta$  9.29 (d,  $J = 7.3$  Hz, 1H), 8.40 (t,  $J = 1.8$  Hz, 1H), 8.13 – 8.08 (ddd,  $J = 7.8, 1.6, 1.1$  Hz, 1H), 8.05 (ddd,  $J = 8.0, 1.9, 1.1$  Hz, 1H), 7.85 (td,  $J = 8.9, 6.4$  Hz, 1H), 7.73 (t,  $J = 7.8$  Hz, 1H), 7.64 – 7.57 (m, 1H), 7.30 – 7.24 (m, 2H), 7.17 (d,  $J = 10.7$  Hz, 1H), 7.05 (d,  $J = 11.2$  Hz, 1H), 6.81 (s, 1H), 4.66 – 4.59 (m, 1H), 3.87 (s, 3H), 3.85 (s, 3H), 3.82 (s, 3H), 3.61 (s, 3H), 2.71 – 2.62 (m, 1H), 2.35 – 2.25 (m, 1H), 2.20 – 2.12 (m, 2H).

$^{13}\text{C}$  NMR (126 MHz, DMSO- $d_6$ )  $\delta$  178.0 (s), 164.4 (dd,  $J = 253.1, 12.0$  Hz), 159.9 (dd,  $J = 259.2, 13.0$  Hz), 153.0 (s), 151.9 (s), 150.7 (s), 150.5 (s), 140.8 (s), 136.9 (dd,  $J = 6.9, 4.0$  Hz), 135.2 (s), 135.2 (s), 134.6 (s), 134.2 (s), 130.7 (s), 130.4 (s), 125.5 (s), 125.1 (s), 122.0 (s), 119.3 (d,  $J = 11.4$  Hz), 112.7 (dd,  $J = 23.1, 3.5$  Hz), 112.2 (s), 105.7 (dd,  $J = 26.7, 23.9$  Hz), 60.7 (s), 60.7 (s), 56.1 (s), 55.9 (s), 52.3 (s), 35.3 (s), 29.3 (s).

$^{19}\text{F}$  NMR (470 MHz, DMSO- $d_6$ )  $\delta$  -107.39 (tdd,  $J = 17.2, 9.0, 6.6$  Hz), -122.69 (dt,  $J = 18.8, 9.4$  Hz).

HRMS (HESI):  $m/z$  602.2100 [602.2097 calcd. for  $\text{C}_{33}\text{H}_{30}\text{F}_2\text{N}_3\text{O}_6^+$  ( $\text{M}+\text{H}^+$ )].

(S,E)-3-((2,6-difluorophenyl)diazenyl)-N-(1,2,3,10-tetramethoxy-9-oxo-5,6,7,9-tetrahydrobenzo[a]heptalen-7-yl)benzamide ***m*-AzoCol26DF**

Compound ***m*-AzoCol26DF** was obtained according to general procedure B in 58% yield

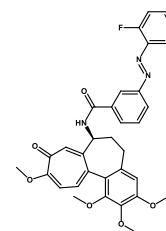

TLC:  $R_f = 0.63$  (DCM/MeOH 9:1),

$^1\text{H}$  NMR (500 MHz, DMSO- $d_6$ )  $\delta$  9.32 (d,  $J = 7.3$  Hz, 1H), 8.40 (t,  $J = 1.8$  Hz, 1H), 8.12 (ddd,  $J = 6.7, 4.5, 3.1$  Hz, 1H), 8.03 (ddd,  $J = 8.0, 1.9, 1.1$  Hz, 1H), 7.74 (t,  $J = 7.8$  Hz, 1H), 7.59 (tt,  $J = 8.5, 6.1$  Hz, 1H), 7.39 – 7.32 (m, 2H), 7.25 (s, 1H), 7.17 (d,  $J = 10.7$  Hz, 1H), 7.06 (d,  $J = 11.2$  Hz, 1H), 6.81 (s, 1H), 4.65 – 4.58 (m, 1H), 3.87 (s, 3H), 3.84 (s, 3H), 3.81 (s, 3H), 3.61 (s, 3H), 2.69 – 2.63 (m, 1H), 2.33 – 2.25 (m, 1H), 2.19 – 2.12 (m, 2H).

$^{13}\text{C}$  NMR (126 MHz, DMSO- $d_6$ )  $\delta$  178.1 (s), 164.9 (s), 163.7 (s), 155.0 (dd,  $J = 257.7, 4.2$  Hz), 153.1 (s), 152.5 (s), 150.8 (s), 150.6 (s), 140.9 (s), 135.4 (s), 135.3 (s), 134.7 (s), 134.3 (s), 132.4 (t,  $J = 10.8$  Hz), 131.4 (s), 130.4 (s), 130.3 (dd,  $J = 19.1, 8.6$  Hz), 123.0 (s), 125.5 (s), 124.9 (s), 121.9 (s), 113.2 (dd,  $J = 19.5, 3.7$  Hz), 112.4 (s), 107.9 (s), 61.1 (s), 60.8 (s), 56.2 (s), 56.0 (s), 52.5 (s), 35.3 (s), 29.7 (s), 29.3 (s).

$^{19}\text{F}$  NMR (470 MHz, DMSO- $d_6$ )  $\delta$  -125.3 (dd,  $J = 9.4, 6.1$  Hz).

HRMS (HESI):  $m/z$  602.2099 [602.2097 calcd. for  $\text{C}_{33}\text{H}_{30}\text{F}_2\text{N}_3\text{O}_6^+$  ( $\text{M}+\text{H}^+$ )].

(S,E)-4-(phenyldiazenyl)-N-(1,2,3,10-tetramethoxy-9-oxo-5,6,7,9-tetrahydrobenzo[a]heptalen-7-yl)benzamide ***p*-AzoCol**

Compound ***p*-AzoCol** was obtained according to general procedure B in 45% yield

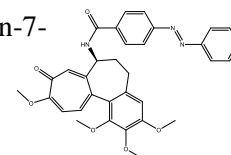

TLC:  $R_f = 0.60$  (DCM/MeOH 9:1),

$^1\text{H}$  NMR (500 MHz, DMSO- $d_6$ )  $\delta$  9.24 (d,  $J = 7.3$  Hz, 1H), 8.13 – 8.09 (m, 2H), 7.99 – 7.96 (m, 2H), 7.95 – 7.89 (m, 1H), 7.65 – 7.59 (m, 3H), 7.26 (s, 1H), 7.17 (d,  $J = 10.7$  Hz, 1H), 7.06 (d,  $J = 11.1$  Hz, 1H), 6.81 (s, 1H), 4.62 (dt,  $J = 10.6, 7.5$  Hz, 1H), 3.88 (s, 3H), 3.85 (s, 3H), 3.82 (s, 3H), 3.61 (s, 3H), 2.70 – 2.62 (m, 1H), 2.35 – 2.24 (m, 1H), 2.21 – 2.11 (m, 2H).

$^{13}\text{C}$  NMR (126 MHz, DMSO- $d_6$ )  $\delta$  178.0 (s), 165.0 (s), 163.6 (s), 153.5 (s), 153.0 (s), 151.9 (s), 150.7

(s), 150.5 (s), 140.8 (s), 135.9 (s), 135.2 (s), 134.6 (s), 134.2 (s), 132.0 (s), 130.4 (s), 129.5 (s), 128.8 (s), 125.5 (s), 122.8 (s), 122.4 (s), 112.2 (s), 107.8 (s), 60.9 (s), 60.7 (s), 56.1 (s), 55.9 (s), 52.3 (s), 45.6 (s), 35.3 (s), 29.3 (s), 8.5 (s).

**HRMS** (HESI):  $m/z$  566.2290 [566.2286 calcd. for  $C_{33}H_{32}N_3O_6^+$  ( $M+H^+$ )].

(S,E)-4-((4-fluorophenyl)diazenyl)-N-(1,2,3,10-tetramethoxy-9-oxo-5,6,7,9-tetrahydrobenzo[a]heptalen-7-yl)benzamide ***p*-AzoCol4F**

Compound ***p*-AzoCol4F** was obtained according to general procedure B in 52% yield

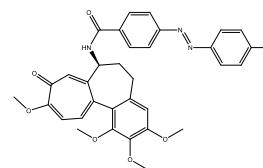

**TLC:**  $R_f$  = 0.60 (DCM/MeOH 9:1),

**$^1H$  NMR** (500 MHz, DMSO- $d_6$ )  $\delta$  9.23 (d,  $J$  = 7.3 Hz, 1H), 8.12 – 8.08 (m, 2H), 8.03 – 7.98 (m, 2H), 7.98 – 7.94 (m, 2H), 7.48 – 7.42 (m, 2H), 7.26 (s, 1H), 7.17 (d,  $J$  = 10.7 Hz, 1H), 7.05 (d,  $J$  = 11.1 Hz, 1H), 6.81 (s, 1H), 4.65 – 4.58 (m, 1H), 3.88 (s, 3H), 3.85 (s, 3H), 3.82 (s, 3H), 3.61 (s, 3H), 2.69 – 2.64 (m, 1H), 2.34 – 2.26 (m, 1H), 2.19 – 2.11 (m, 2H).

**$^{13}C$  NMR** (126 MHz, DMSO- $d_6$ )  $\delta$  177.9 (s), 165.0 (s), 164.1 (d,  $J$  = 250.8 Hz), 163.6 (s), 153.3 (s), 153.0 (s), 150.7 (s), 150.5 (s), 148.7 (d,  $J$  = 2.8 Hz), 140.8 (s), 136.0 (s), 135.2 (s), 134.6 (s), 134.2 (s), 130.4 (s), 128.8 (s), 125.5 (s), 125.2 (d,  $J$  = 9.3 Hz), 122.4 (s), 116.6 (d,  $J$  = 23.0 Hz), 112.2 (s), 107.8 (s), 60.9 (s), 60.7 (s), 56.1 (s), 55.9 (s), 52.3 (s), 35.3 (s), 29.3 (s).

**$^{19}F$  NMR** (470 MHz, DMSO- $d_6$ )  $\delta$  -111.5 (tt,  $J$  = 8.5, 5.3 Hz).

**HRMS** (HESI):  $m/z$  584.2191 [584.2191 calcd. for  $C_{33}H_{31}FN_3O_6^+$  ( $M+H^+$ )].

(S,E)-4-((2,4-difluorophenyl)diazenyl)-N-(1,2,3,10-tetramethoxy-9-oxo-5,6,7,9-tetrahydrobenzo[a]heptalen-7-yl)benzamide ***p*-AzoCol24DF**

Compound ***p*-AzoCol24DF** was obtained according to general procedure B in 61% yield

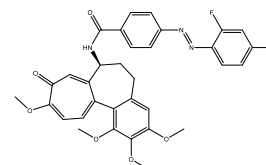

**TLC:**  $R_f$  = 0.59 (DCM/MeOH 9:1),

**$^1H$  NMR** (500 MHz, DMSO- $d_6$ )  $\delta$  9.24 (d,  $J$  = 7.3 Hz, 1H), 8.11 (d,  $J$  = 8.6 Hz, 2H), 7.97 (d,  $J$  = 8.6 Hz, 2H), 7.86 (td,  $J$  = 8.9, 6.4 Hz, 1H), 7.64 – 7.57 (m, 1H), 7.30 – 7.23 (m, 2H), 7.17 (d,  $J$  = 10.7 Hz, 1H), 7.06 (d,  $J$  = 11.0 Hz, 1H), 6.81 (s, 1H), 4.64 – 4.58 (m, 1H), 3.87 (s, 3H), 3.85 (s, 3H), 3.81 (s, 3H), 3.61 (s, 3H), 2.72 – 2.61 (m, 1H), 2.35 – 2.24 (m, 1H), 2.20 – 2.10 (m, 2H).

**$^{13}C$  NMR** (126 MHz, DMSO- $d_6$ )  $\delta$  178.0 (s), 165.0 (s), 164.5 (dd,  $J$  = 253.9, 11.9 Hz), 163.6 (s), 160.1 (dd,  $J$  = 259.2, 13.3 Hz), 153.5 (s), 153.0 (s), 150.7 (s), 150.5 (s), 140.8 (s), 137.0 (dd,  $J$  = 6.9, 4.0 Hz), 136.4 (s), 135.3 (s), 134.6 (s), 134.3 (s), 130.4 (s), 128.9 (s), 125.5 (s), 122.7 (s), 119.3 (d,  $J$  = 10.6 Hz), 112.7 (dd,  $J$  = 23.2, 3.5 Hz), 112.3 (s), 107.8 (s), 105.8 (dd,  $J$  = 26.7, 23.9 Hz), 61.0 (s), 60.8 (s), 56.1 (s), 55.9 (s), 52.4 (s), 35.3 (s), 29.3 (s).

**$^{19}F$  NMR** (470 MHz, DMSO- $d_6$ )  $\delta$  -107.0 (tdd,  $J$  = 17.3, 9.0, 6.6 Hz), -122.6 (dt,  $J$  = 19.6, 9.9 Hz).

**HRMS** (HESI):  $m/z$  602.2100 [602.2097 calcd. for  $C_{33}H_{30}F_2N_3O_6^+$  ( $M+H^+$ )].

(S,E)-4-((2,6-difluorophenyl)diazenyl)-N-(1,2,3,10-tetramethoxy-9-oxo-5,6,7,9-tetrahydrobenzo[a]heptalen-7-yl)benzamide ***p*-AzoCol26DF**

Compound ***p*-AzoCol26DF** was obtained according to general procedure B in 60% yield

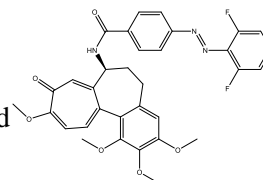

**TLC:**  $R_f$  = 0.65 (DCM/MeOH 9:1),

**$^1H$  NMR** (500 MHz, DMSO- $d_6$ )  $\delta$  9.28 (d,  $J$  = 7.2 Hz, 1H), 8.10 (d,  $J$  = 8.6 Hz, 2H), 7.95 (d,  $J$  = 8.6 Hz, 2H), 7.59 (tt,  $J$  = 8.5, 6.1 Hz, 1H), 7.38 – 7.31 (m, 2H), 7.25 (s, 1H), 7.17 (d,  $J$  = 10.7 Hz, 1H), 7.06 (d,  $J$  = 11.1 Hz, 1H), 6.80 (s, 1H), 4.63 – 4.56 (m, 1H), 3.87 (s, 3H), 3.84 (s, 3H), 3.80 (s, 3H), 3.60 (s, 3H), 2.69 – 2.63 (m, 1H), 2.32 – 2.24 (m, 1H), 2.18 – 2.11 (m, 2H).

**$^{13}C$  NMR** (126 MHz, DMSO- $d_6$ )  $\delta$  178.2 (s), 165.2 (s), 163.8 (s), 155.1 (dd,  $J$  = 258.0, 4.3 Hz), 154.1 (s), 153.2 (s), 151.0 (s), 150.7 (s), 140.9 (s), 136.9 (s), 135.5 (s), 134.9 (s), 134.4 (s), 132.7 (t,  $J$  = 11.0 Hz), 130.5 (s), 130.4 (t,  $J$  = 10.0 Hz), 129.0 (s), 125.6 (s), 122.6 (s), 113.2 (dd,  $J$  = 19.7, 3.7 Hz),

112.5 (s), 108.0 (s), 61.1 (s), 60.9 (s), 56.2 (s), 56.0 (s), 52.6 (s), 35.4 (s), 29.4 (s).

**<sup>19</sup>F NMR** (470 MHz, DMSO-d<sub>6</sub>) δ -125.3 (dd, *J* = 9.4, 6.1 Hz).

**HRMS** (HESI): *m/z* 602.2099 [602.2097 calcd. for C<sub>33</sub>H<sub>30</sub>F<sub>2</sub>N<sub>3</sub>O<sub>6</sub><sup>+</sup> (M+H<sup>+</sup>)].

(S)-2-amino-N-(1,2,3,10-tetramethoxy-9-oxo-5,6,7,9-tetrahydrobenzo[*a*]heptalen-7-yl)benzamide – Intermediate **S1**.

**<sup>1</sup>H NMR** (500 MHz, CDCl<sub>3</sub>) δ 7.57 – 7.50 (m, 2H), 7.30 (d, *J* = 10.7 Hz, 1H), 7.16 (d, *J* = 6.0 Hz, 1H), 7.13 – 7.07 (m, 1H), 6.82 (d, *J* = 11.1 Hz, 1H), 6.59 (dd, *J* = 13.7, 7.3 Hz, 2H), 6.53 (s, 1H), 4.77 (dt, *J* = 12.8, 6.6 Hz, 1H), 3.96 (s, 3H), 3.94 (s, 3H), 3.89 (s, 3H), 3.70 (s, 3H), 2.53 (dd, *J* = 13.4, 6.3 Hz, 1H), 2.42 (td, *J* = 13.1, 6.8 Hz, 1H), 2.32 – 2.22 (m, 1H), 1.98 (dd, *J* = 11.7, 5.3 Hz, 1H).

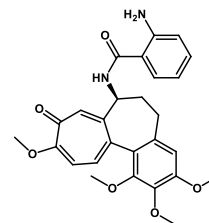



## NMR & UV-VIS Data – Photostationary State (PSS) Analysis, Photoswitching and Half-Life Determination

### Illumination setup for light-dependent assays:

Based on previously described data [4-8] for illumination of samples we decided to use self-built arrays of 24 low-power light-emitting diodes (LED) controlled by Arduino board. Such an automated system allowed precise pulsed illumination during long-term assays. Most importantly, it has been proven to be compatible with cell culturing conditions. The proposed system consisted of the Arduino microcomputer to drive an 8-Relay module, which turns on and off sets of LED-arrays to flash with identical timings. The following wavelengths of LEDs were used in this study (in nm): 390, 400, 430, 470, 505, 515, 525, 535, 590, 610 nm. all LEDs were bought from Mouser Electronics, Inc., and the corresponding Mouser part numbers are 749-UV5TZ-390-30, 749-UV5TZ-400-15, 749-5BWC, 630-HLMP-CB3A-UV0DD, 630-HLMP-CE34-Y1CDD, 859-LTL2V3TCYK2, 630-HLMP-CM3A-Z10DD, 859-LTL2V3TGX3KS, 630-HLMP-EL1A-Z1KDD, respectively. Only one wavelength of LED was used per array, and arrays at different wavelengths were kept in separate cardboard boxes. We consider this crucial since with standard, clear well plates, light scattering from one well across the whole plate was often observed to be significant enough to compromise results.

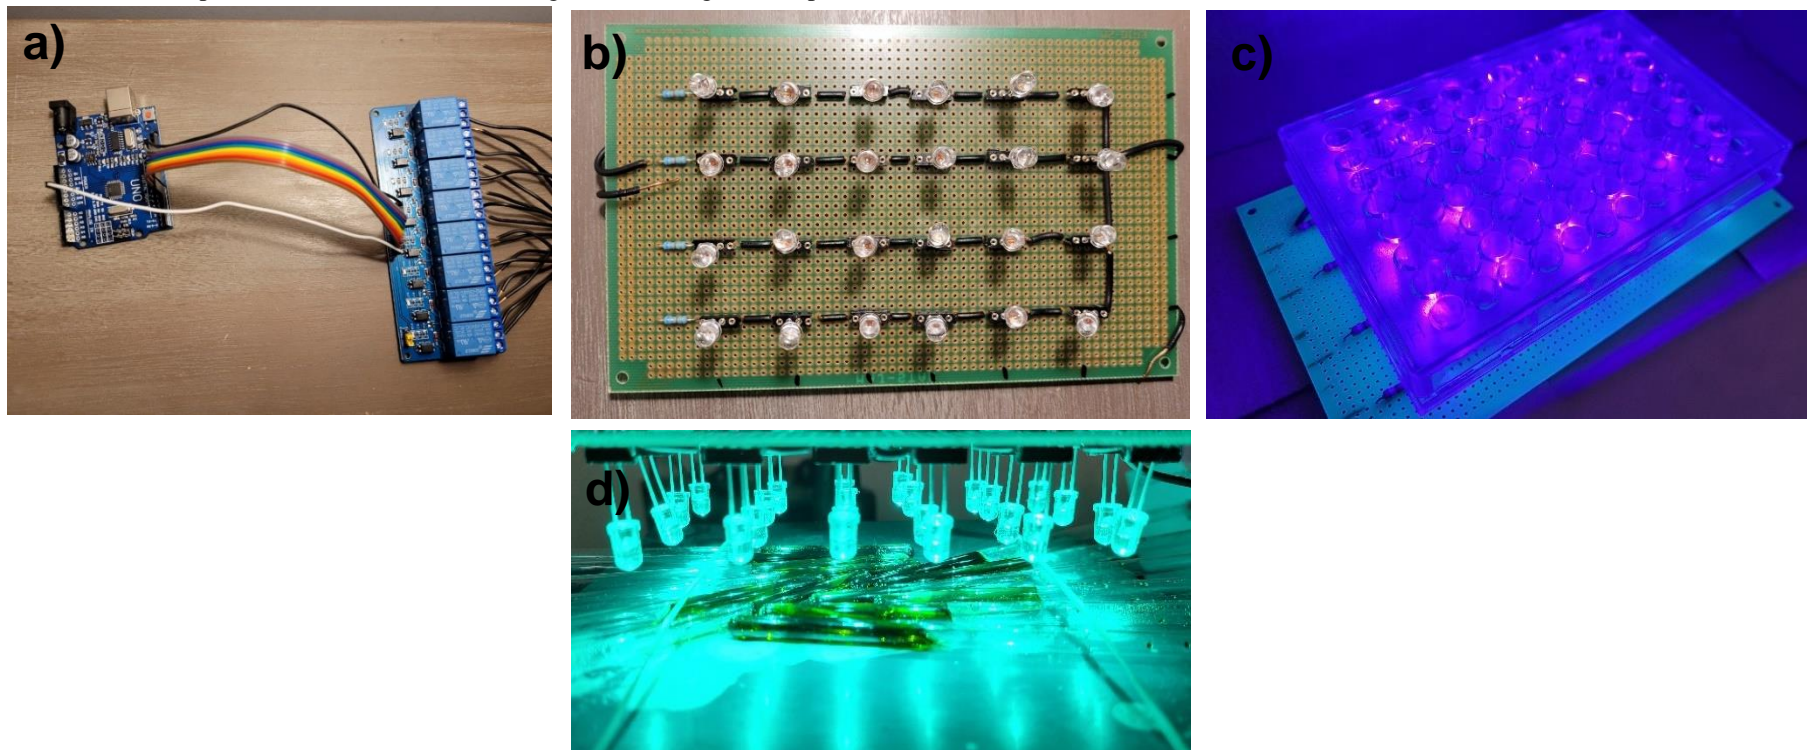

**Figure S1.** Illumination setup for light-dependent assays used in this study: (a) Arduino board connected with 8-Relay module, (b) Front of 24 low-power light-emitting diode array, (c) Array illuminating 96-well plate, (d) Array illuminating NMR samples.

**Photostationary State (PSS) Analysis by  $^1\text{H}$  or  $^{19}\text{F}$  NMR spectroscopy:**

The PSS composition was determined by measuring  $^1\text{H}$  or NMR  $^{19}\text{F}$  spectra (DMSO- $d_6$ ,  $c \approx 2 \text{ mM}$ ) of the respective compounds after irradiation. For thermally adapted experiments samples were kept in the dark at  $120^\circ\text{C}$  overnight to ensure complete relaxation to (*E*) isomer. Next, the probe was illuminated with LEDs of different wavelengths while gradually increasing the irradiation time until no change in the spectrum was detectable.

**Photoisomerization studies by UV-VIS spectroscopy:**

EnSpire® multimode plate reader (PerkinElmer, Turku, Finland) with the software EnSpire Workstation version 4.10.3005.1440 (PerkinElmer) in absorbance mode was used for UV-VIS spectroscopic measurements. All experiments were done in at least triplicate. Stock solutions of selected compounds were made in DMSO at appropriate concentrations and stirred at  $120^\circ\text{C}$  overnight to ensure complete relaxation to (*E*) isomer. Next  $100 \mu\text{L}$  of stock solution was transferred to 96 – a well plate as quickly as possible and absorbance was read. Afterward, samples were illuminated with green light ( $\lambda = 535 \text{ nm}$ ) by a self-made LED setup. Samples were illuminated with increasing periods of time until no further changes in the spectrum were observed.

**Photoswitching experiments:**

EnSpire® multimode plate reader (PerkinElmer, Turku, Finland) with the software EnSpire Workstation version 4.10.3005.1440 (PerkinElmer) in absorbance mode was used for UV-VIS photoswitching measurements. Samples were prepared in the 24 well plate and illuminated first with green (535 nm) light for 15 minutes. Next well plate was transferred as quickly as possible and absorbance was read. Afterwards, samples were illuminated with blue (430 nm) light for 15 minutes and the well plate was transferred as quickly as possible and absorbance was read. Then the protocol was repeated several times.

**Half-Life Determination:**

Samples were prepared in the well plate and illuminated with green light ( $\lambda = 535 \text{ nm}$ ) by array of LEDs while gradually increasing the irradiation time until no change in the spectrum was detectable. Then the well plate was placed in EnSpire® multimode plate reader and the absorbance was followed for 48 hours at  $37^\circ\text{C}$ . The (*Z*)  $\rightarrow$  (*E*) spontaneous relaxation half-life time was calculated using GraphPad Prism software (GraphPad Software Inc, San Diego, CA, USA).

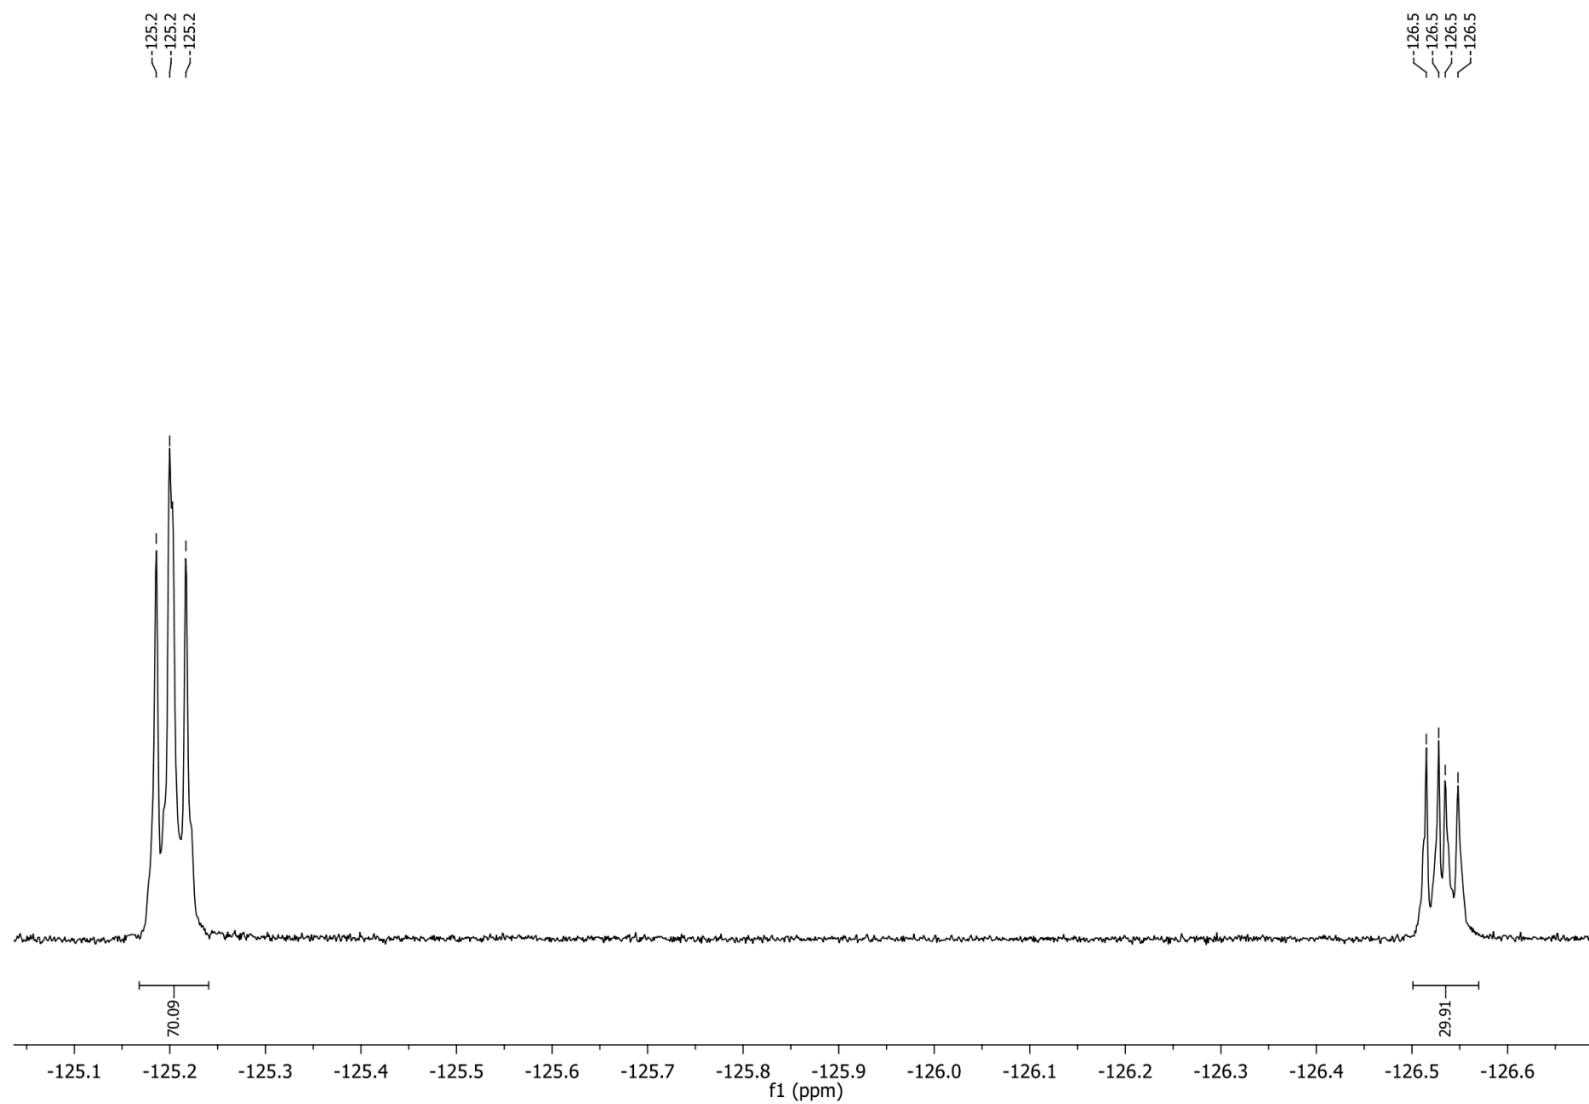

**Figure S2.** Distribution of (*E*) and (*Z*) isomers for compound *m*-**3d** in  $\text{DMSO-d}_6$  ( $c \approx 2 \text{ mM}$ ) after continuous irradiation with green light ( $\lambda = 535 \text{ nm}$ ) for 2h. The sample contained 70 % of (*Z*) isomer.

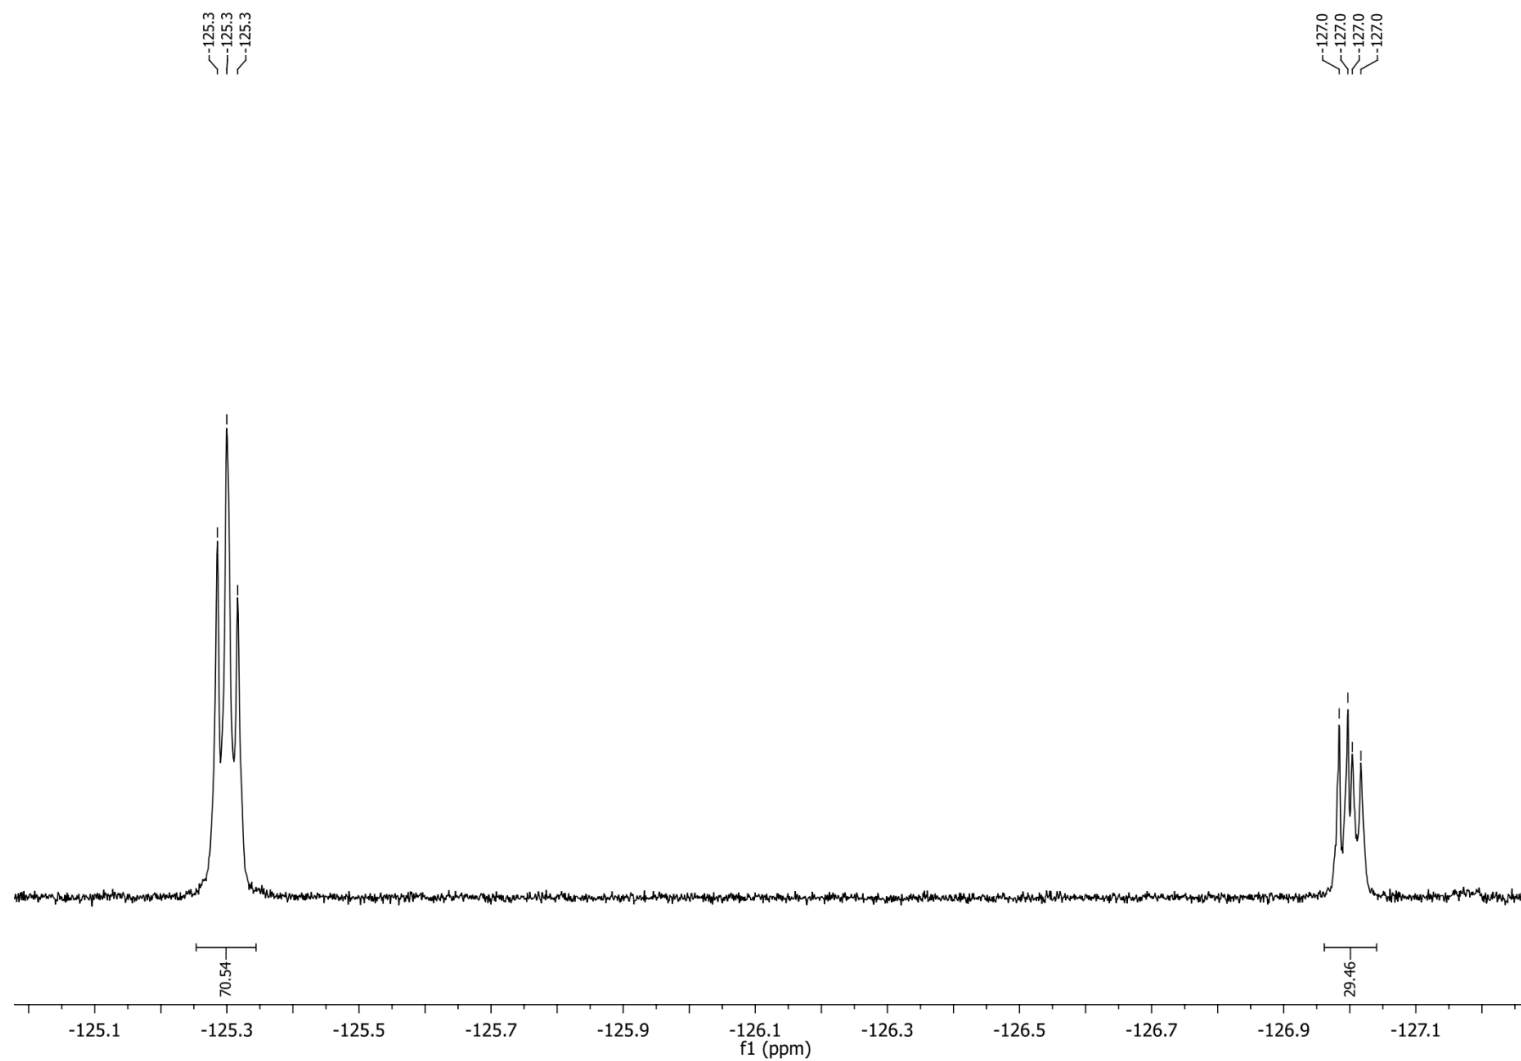

**Figure S3.** Distribution of (*E*) and (*Z*) isomers for compound *m*-AzoCol26DF in DMSO- $\text{d}_6$  ( $c \approx 2$  mM) after continuous irradiation with green light ( $\lambda = 535$  nm) for 2h. The sample contained 71 % of (*Z*) isomer.



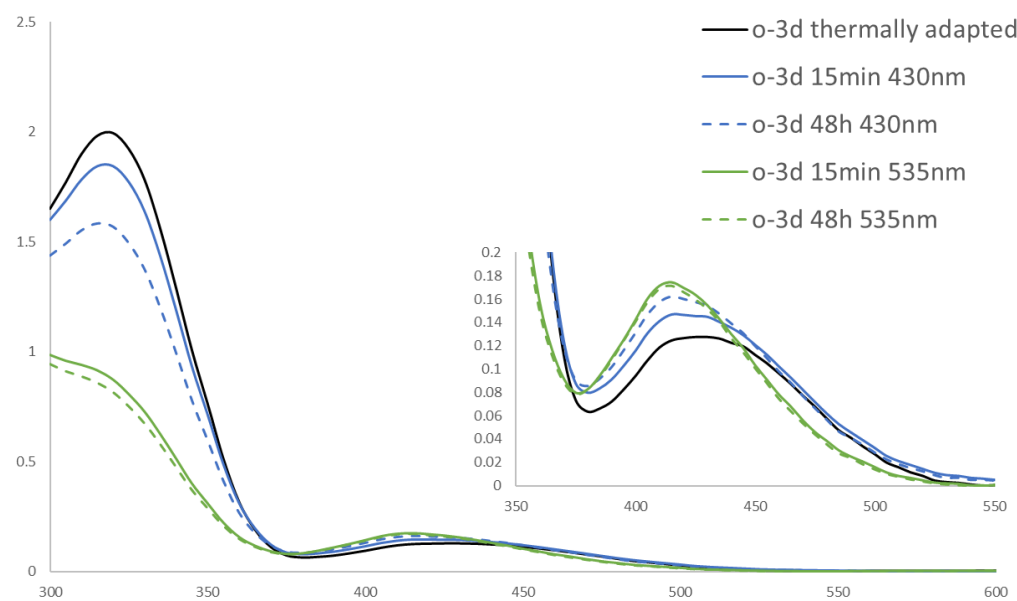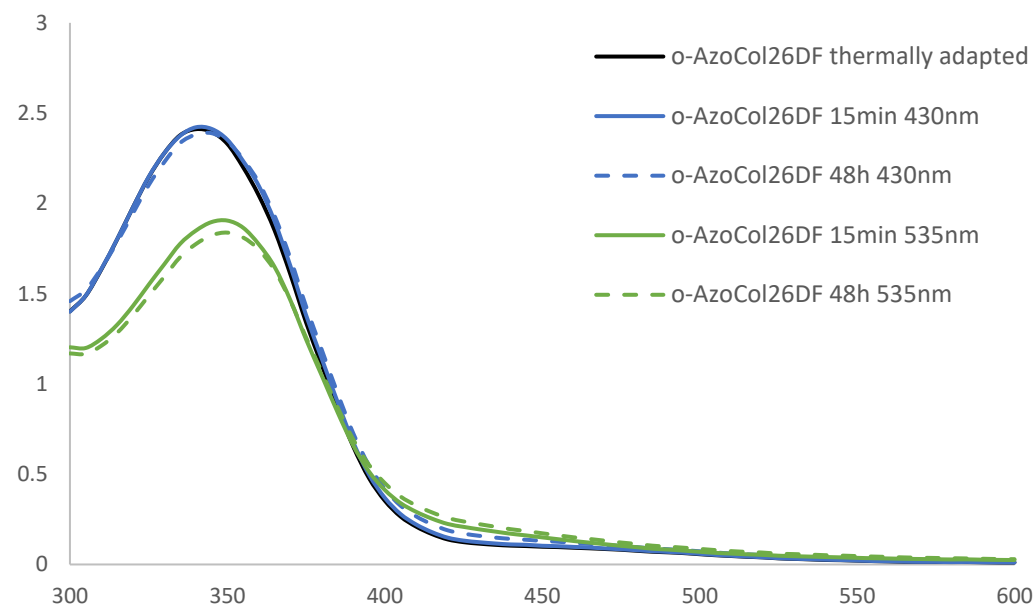

**Figure S5.** UV-Vis absorption spectra of thermally adapted and pulsed green (535 nm) and blue (430 nm) light irradiated 500  $\mu$ M of (a) *o*-**3d** and (b) *o*-**AzoCol26DF** in Dulbecco's Modified Eagle's Medium (Thermo Fisher Scientific, 11054020) supplemented with 4.5 g/L glucose and 4 mM L-glutamine with 10% of DMSO.

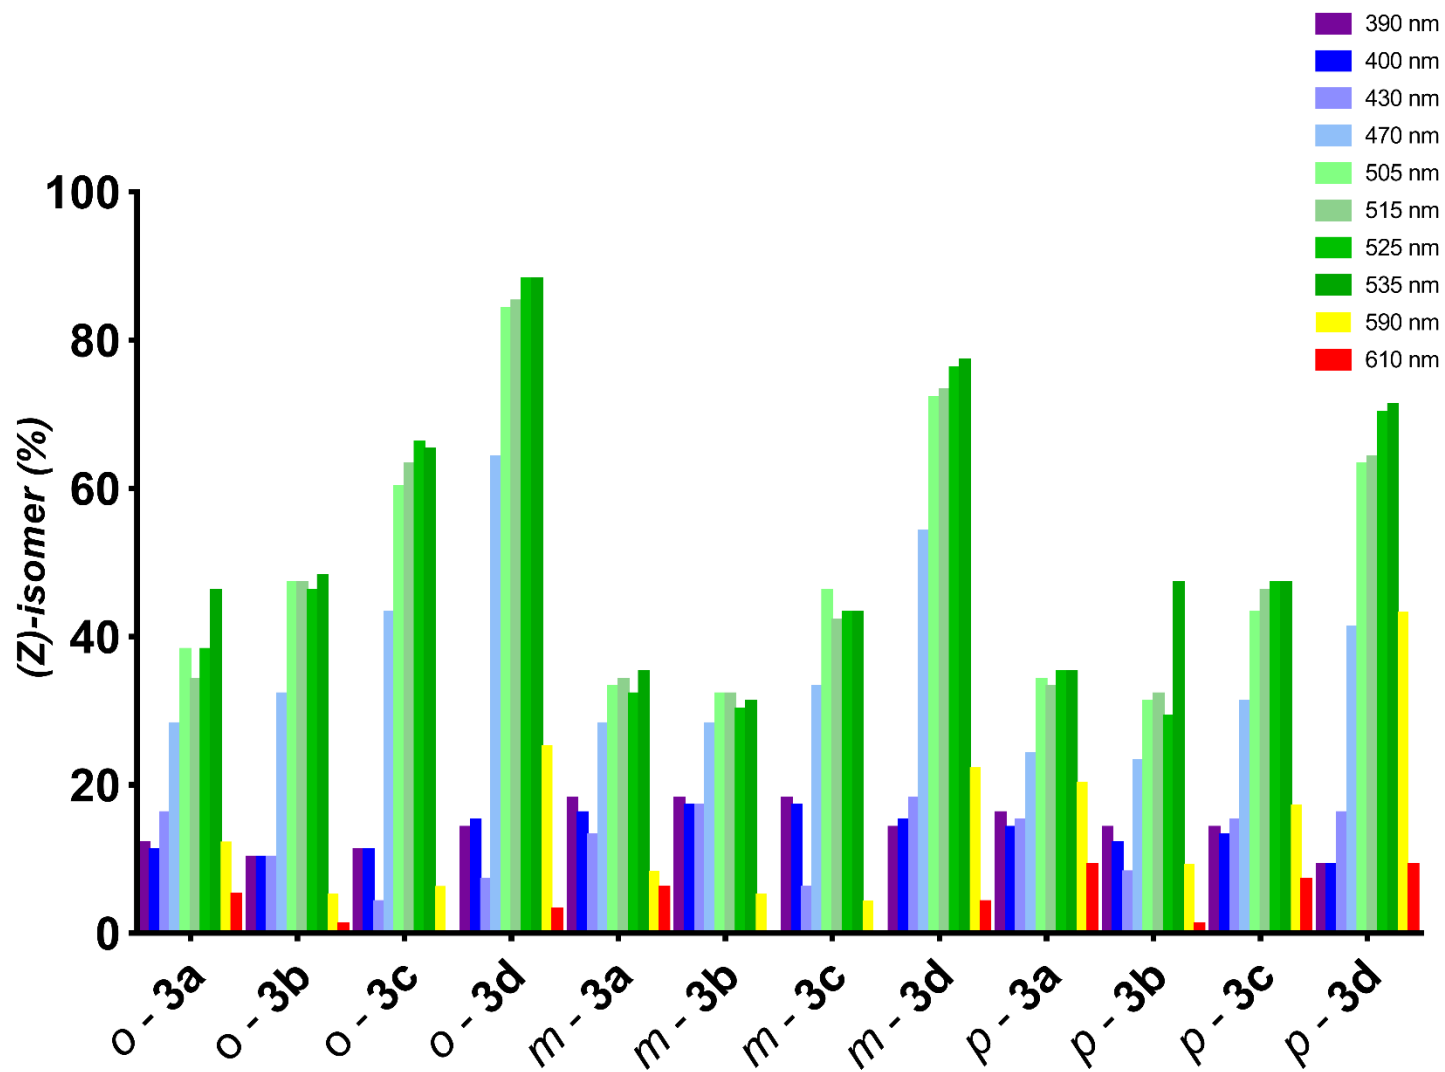

**Figure S6.** Photostationary state (PSS) compositions for azobenzenes *o*-, *m*-, *p*-**3a-d** determined by  $^1\text{H}$  or  $^{19}\text{F}$  NMR analysis ( $c \approx 10$  mM in  $\text{DMSO-}d_6$ ).

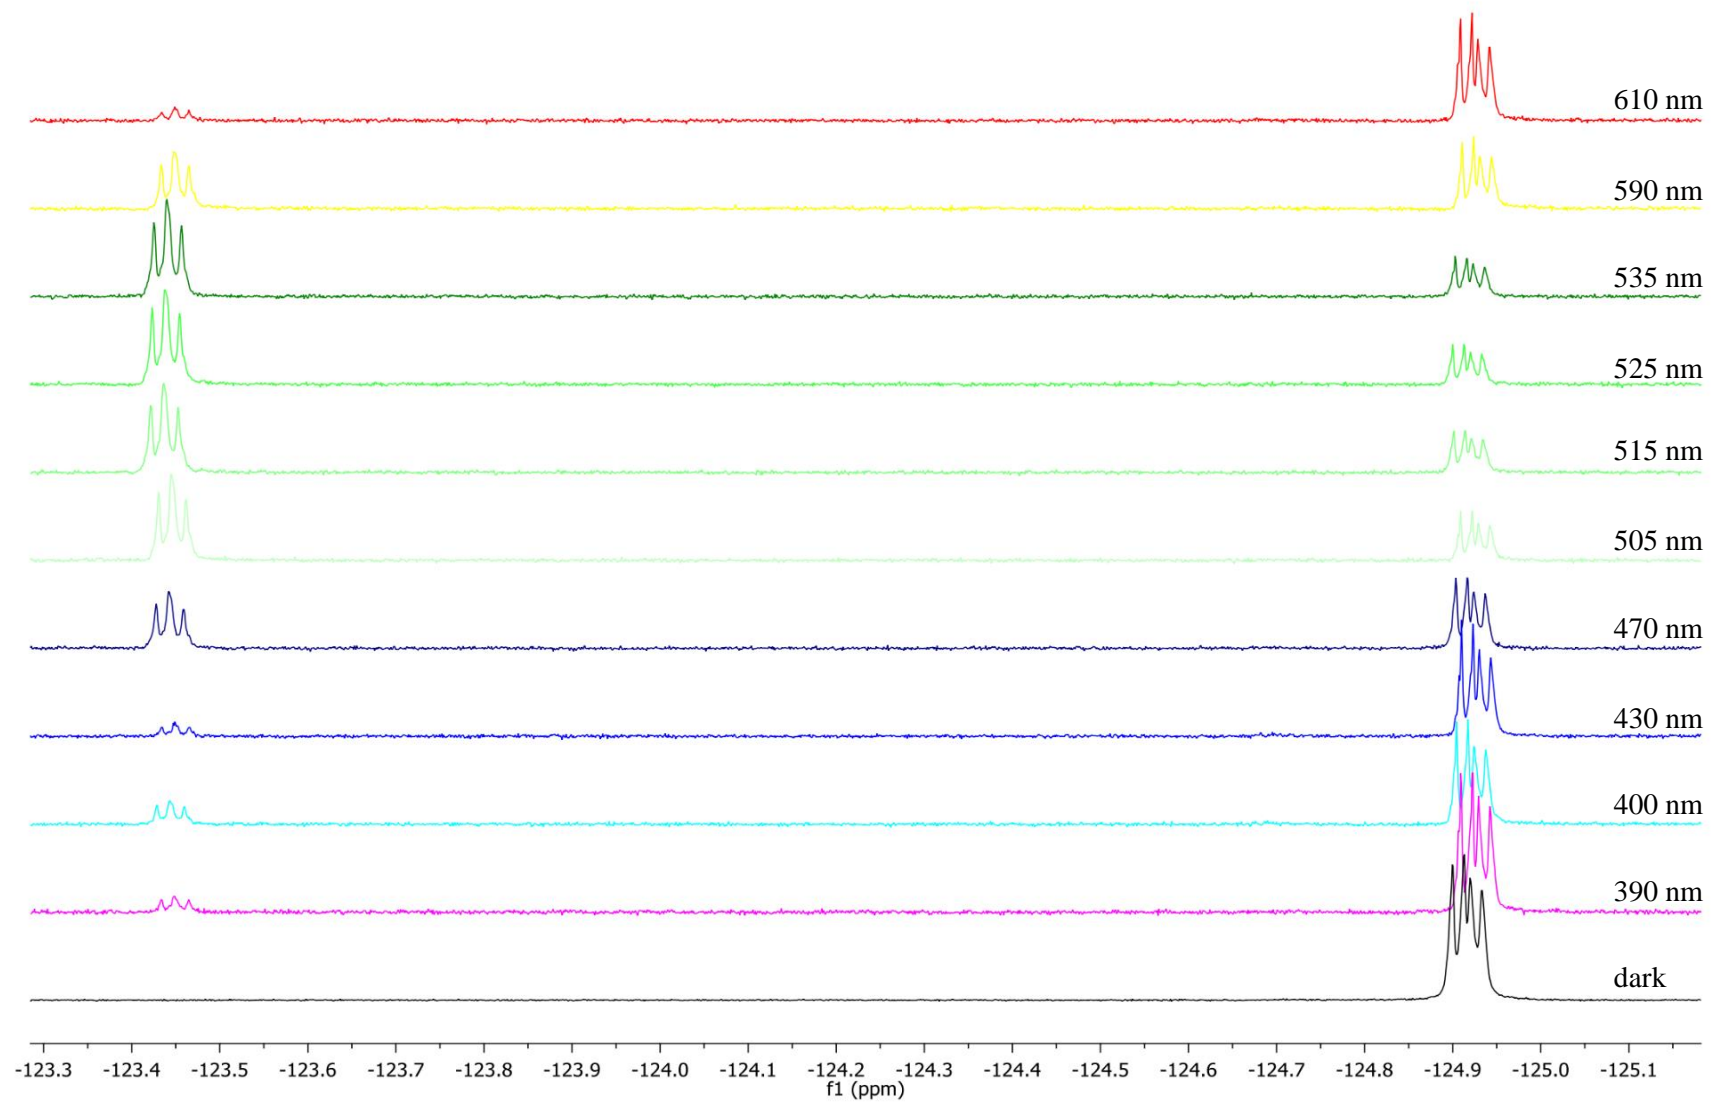

**Figure S7.** Partial  $^{19}\text{F}$  NMR spectra of *p*-3d at dark adapted state and after irradiation with light at different wavelength in DMSO- $\text{d}_6$  ( $c \approx 2$  mM).



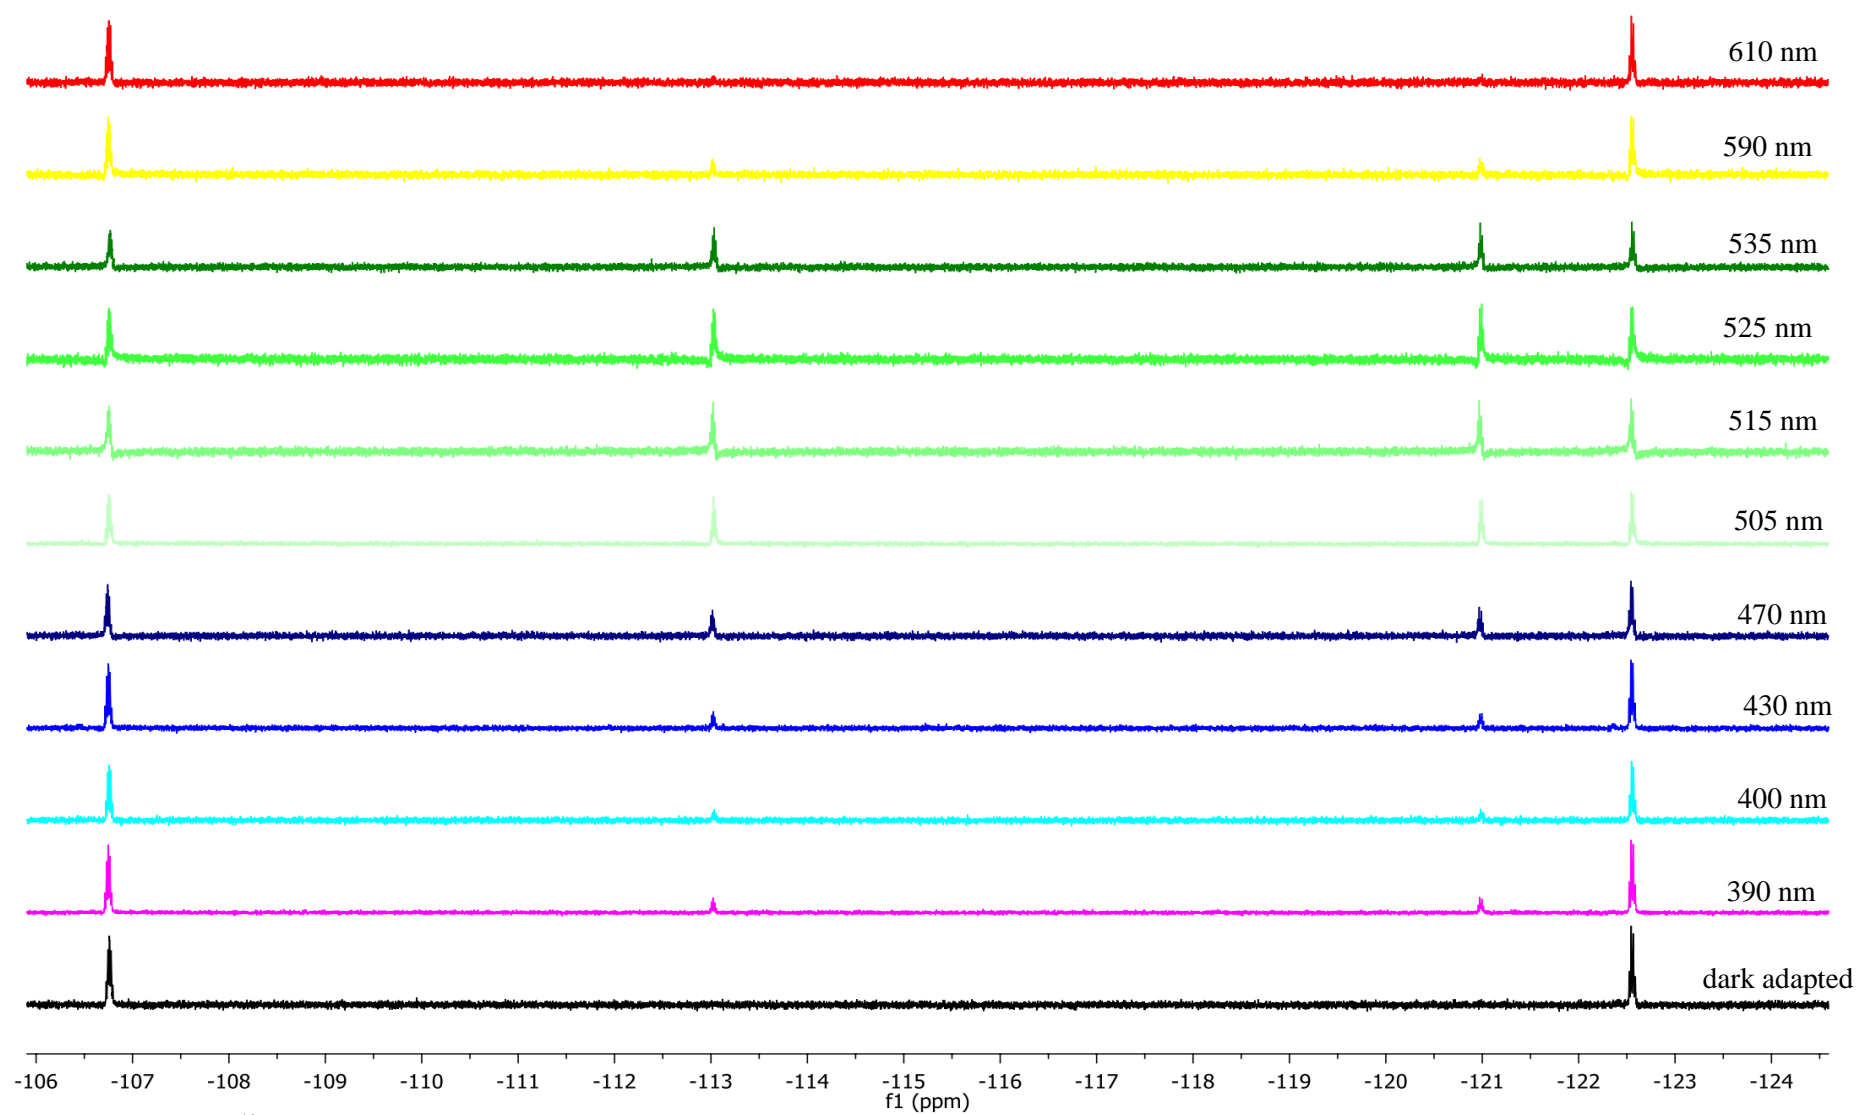

**Figure S8.** Partial  $^{19}\text{F}$  NMR spectra of *p*-3c at dark adapted state and after irradiation with light at different wavelength in DMSO- $\text{d}_6$  ( $c \approx 2$  mM).

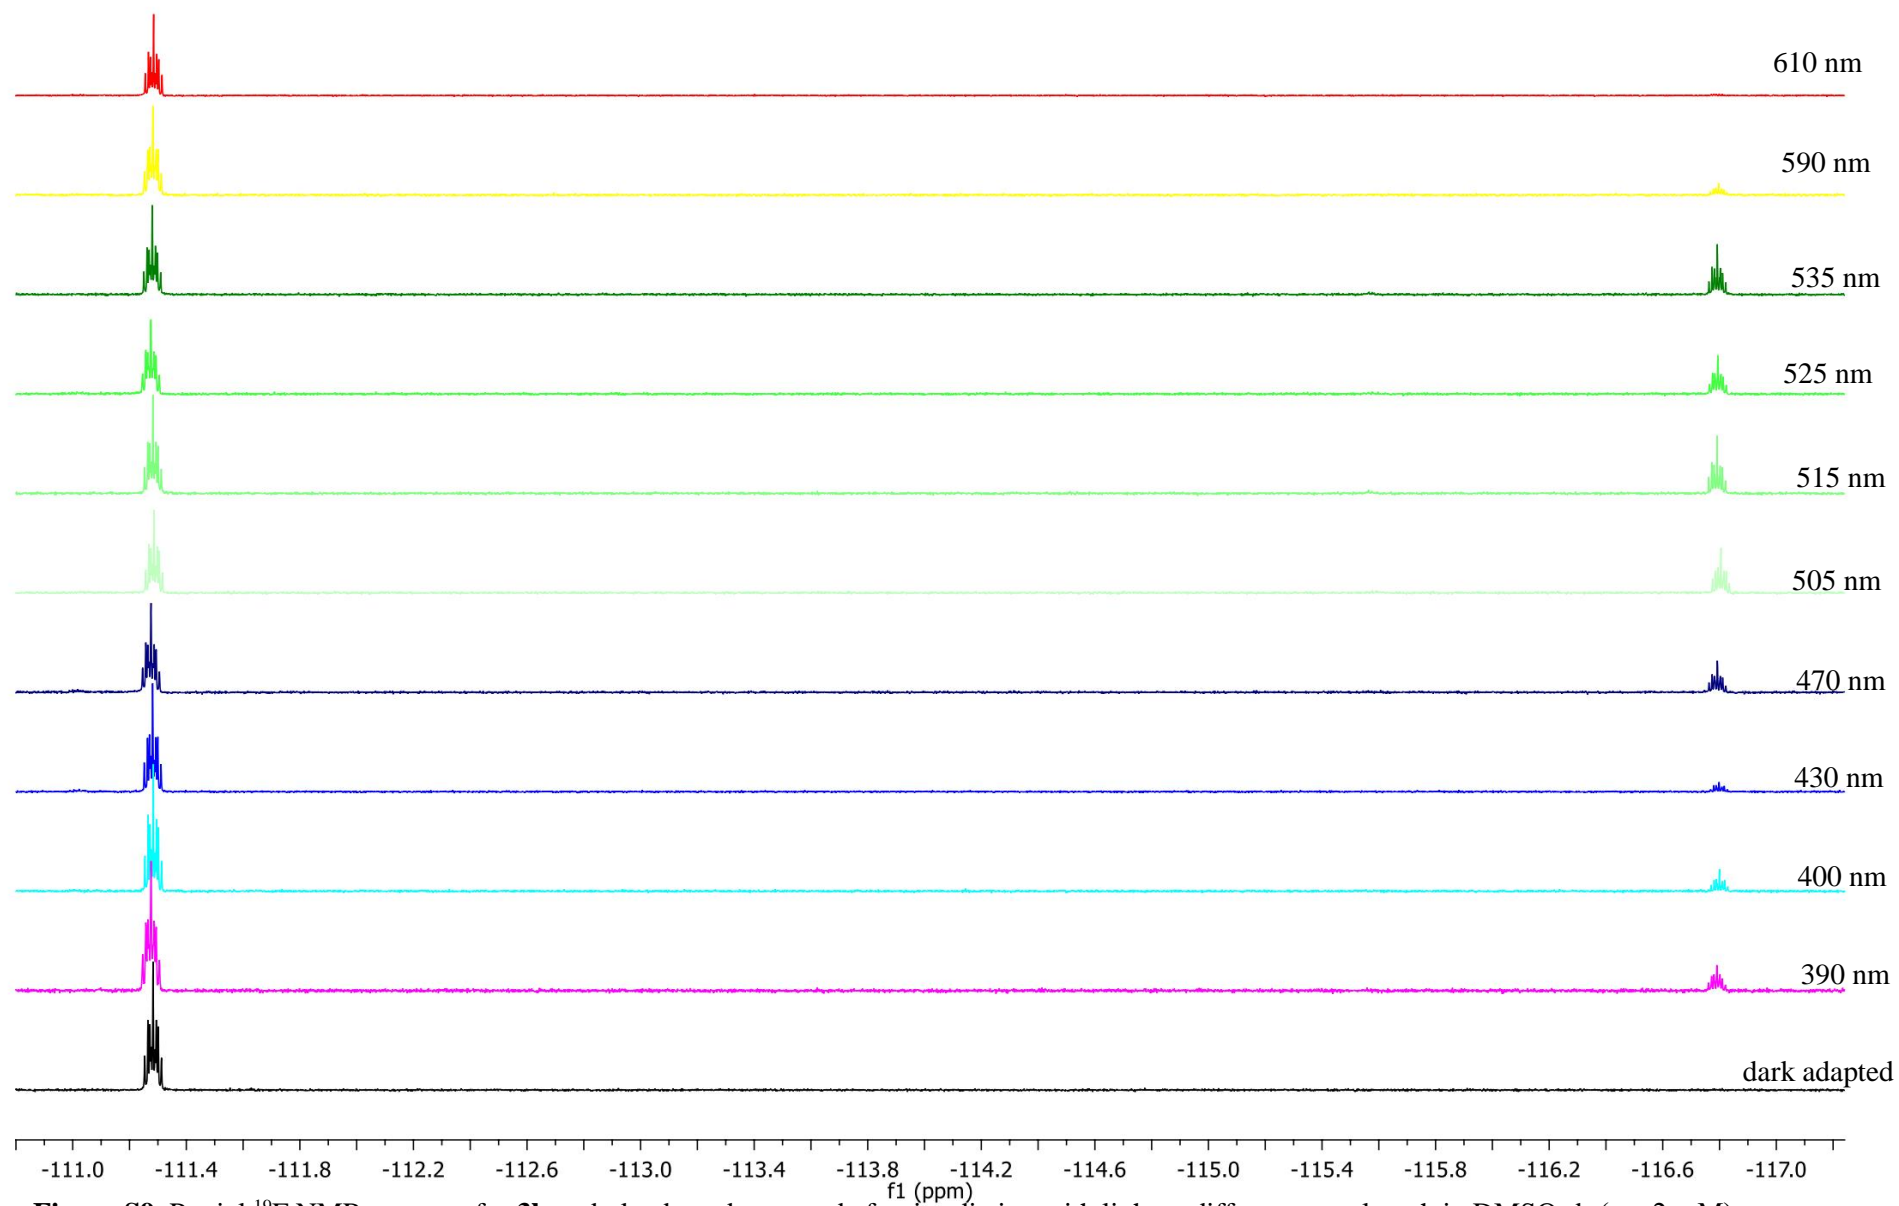

**Figure S9.** Partial  $^{19}\text{F}$  NMR spectra of *p*-**3b** at dark adapted state and after irradiation with light at different wavelength in DMSO- $\text{d}_6$  ( $c \approx 2$  mM).

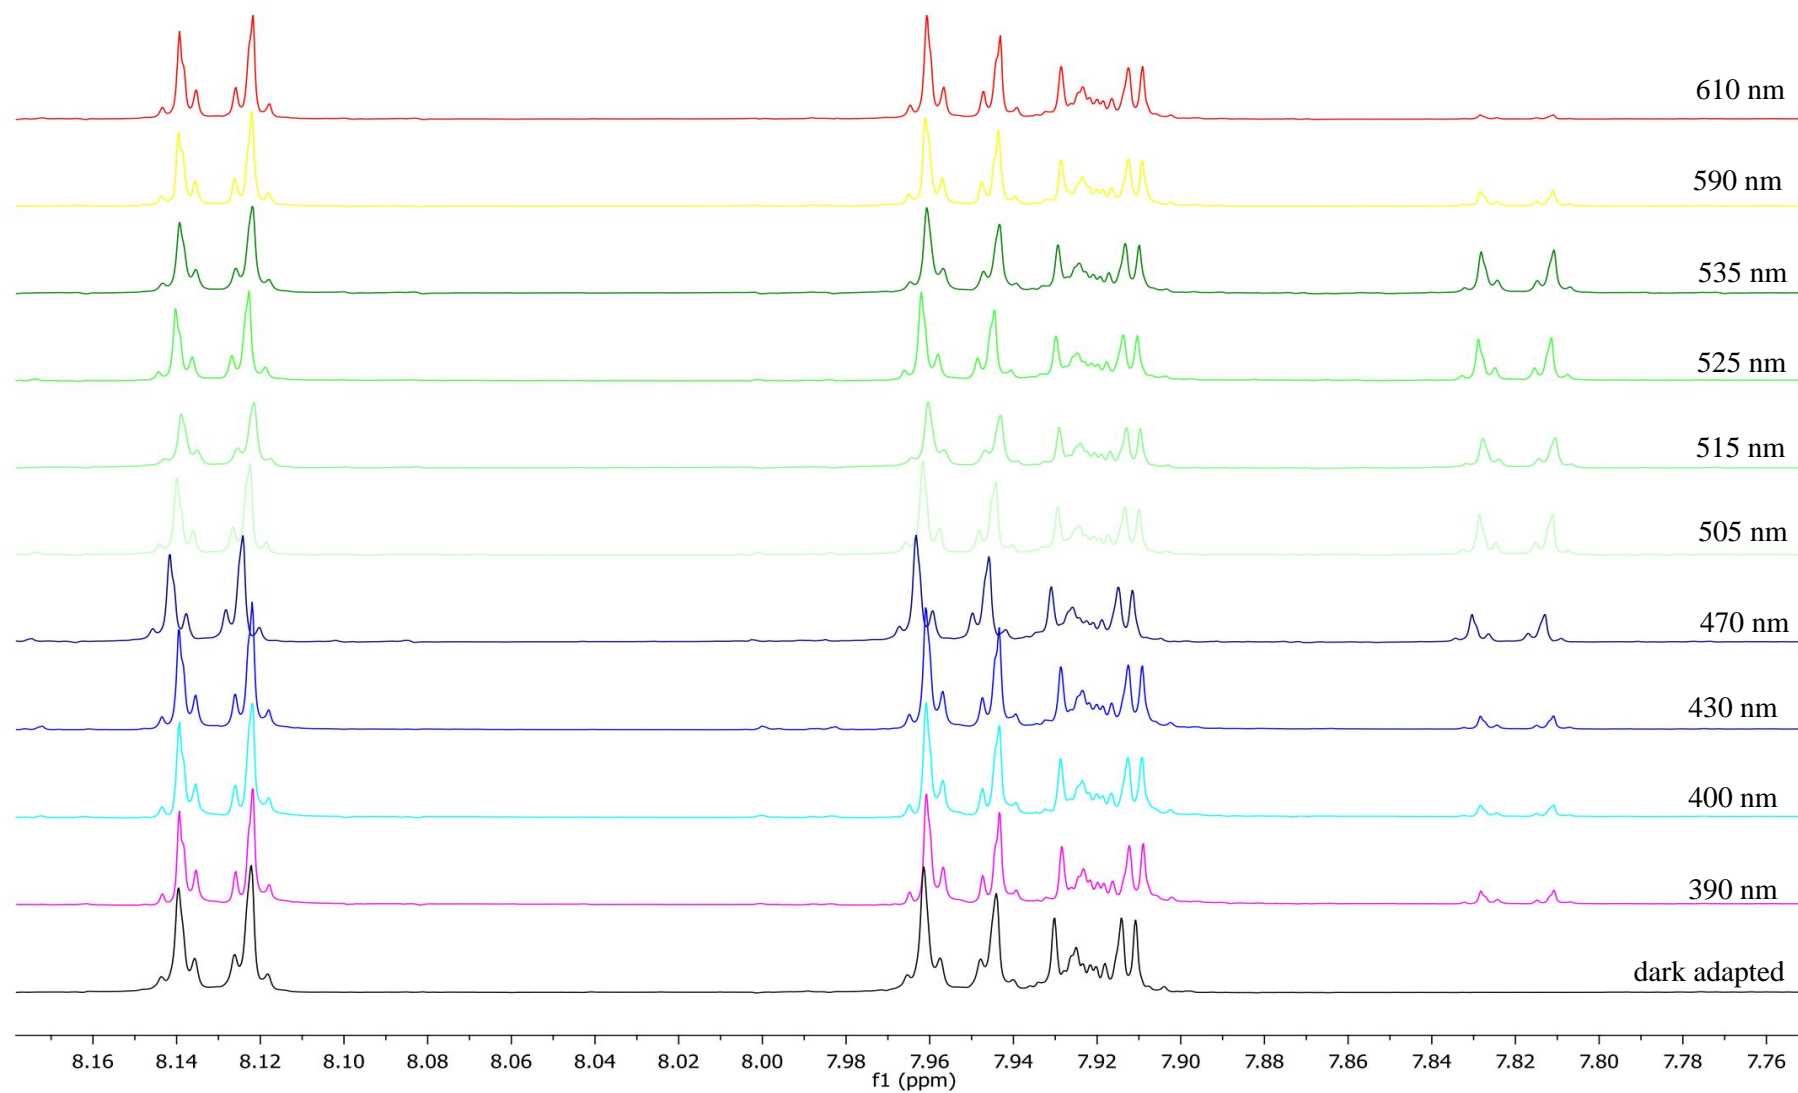

**Figure S10.** Partial  $^1\text{H}$  NMR spectra of *p*-3a at dark adapted state and after irradiation with light at different wavelength in DMSO- $d_6$  ( $c \approx 2$  mM).

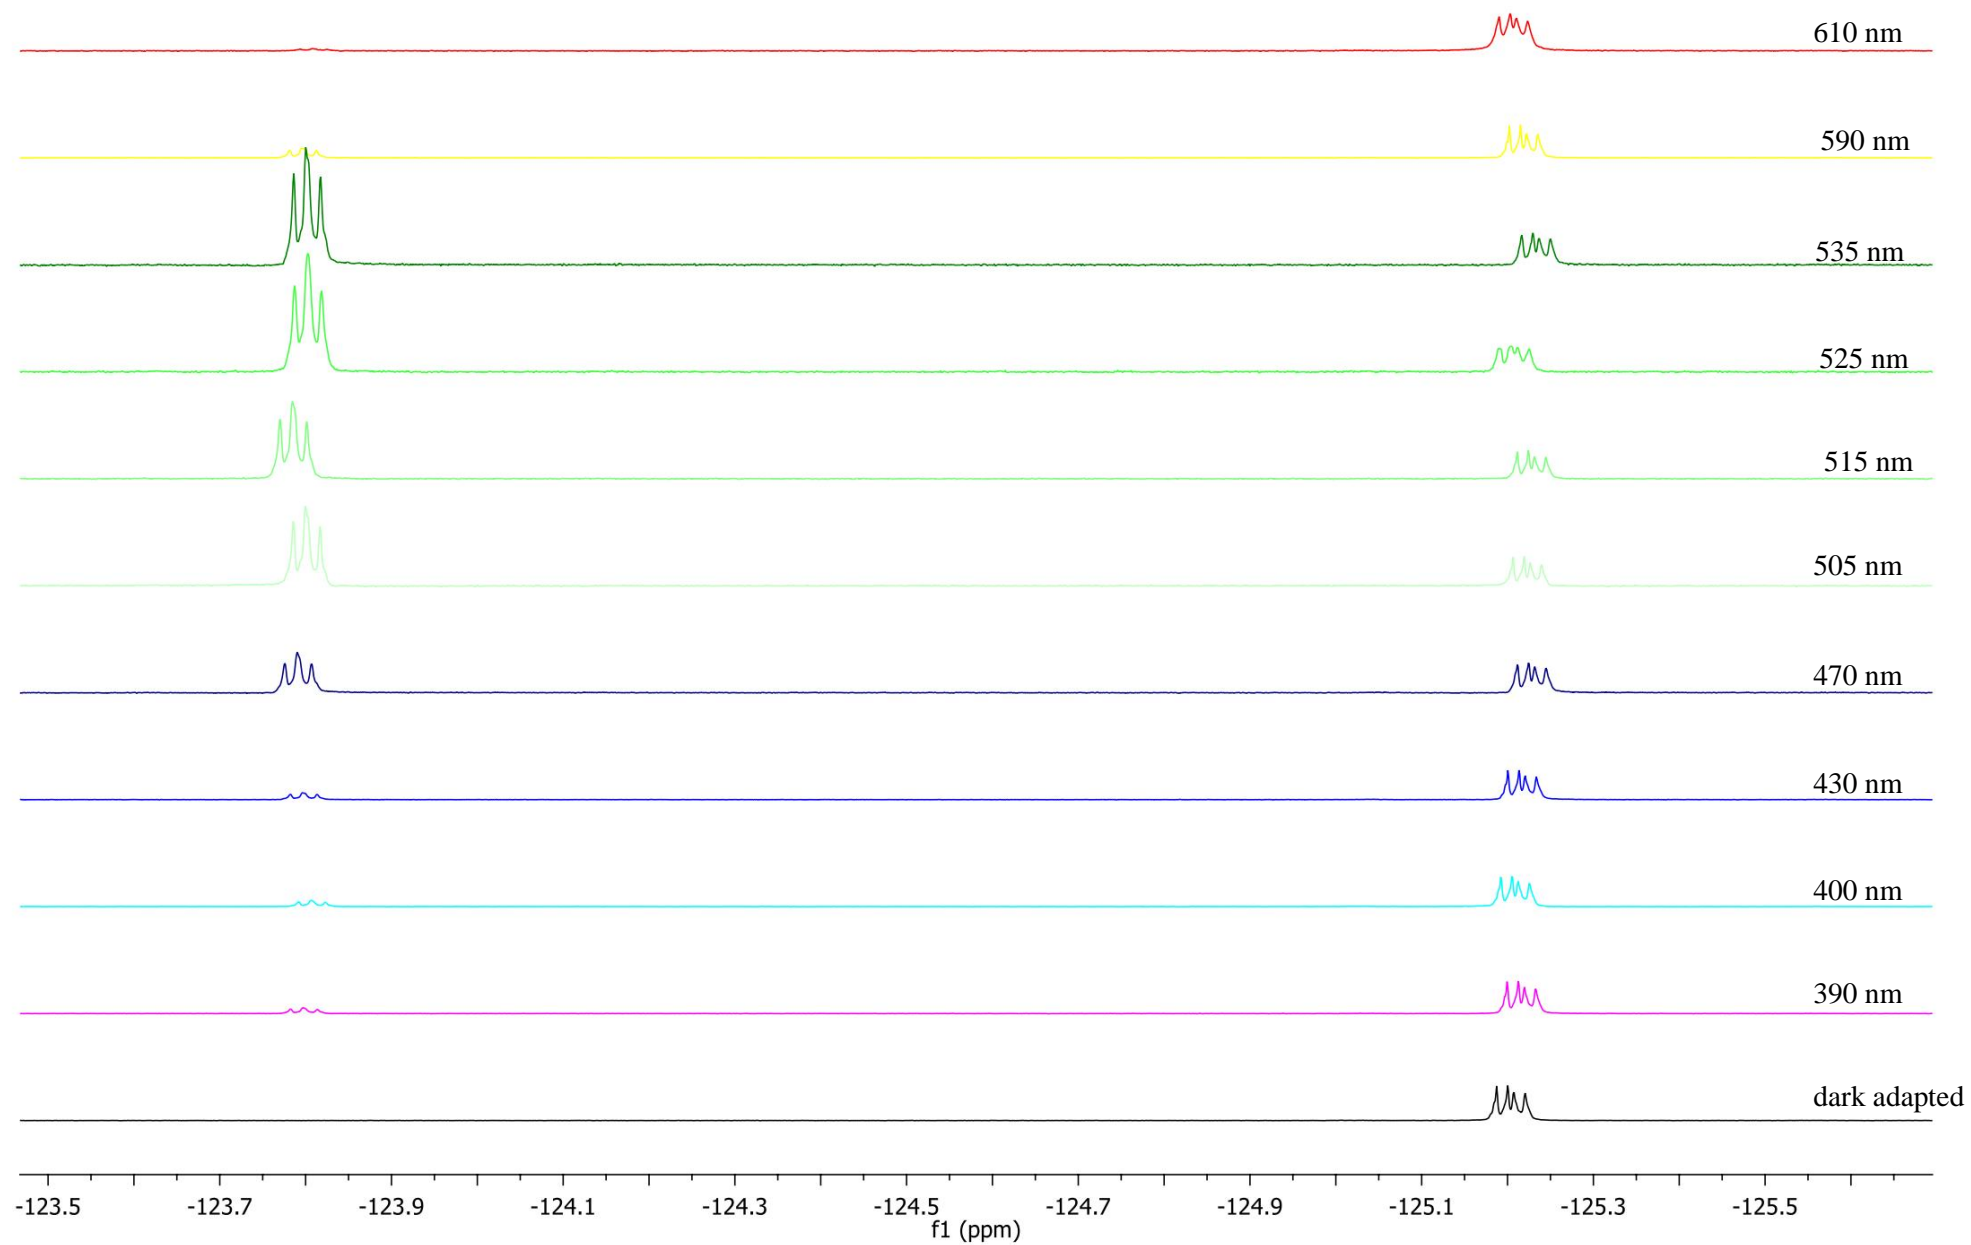

**Figure S11.** Partial  $^{19}\text{F}$  NMR spectra of *m*-3d at dark adapted state and after irradiation with light at different wavelength in DMSO- $\text{d}_6$  ( $c \approx 2$  mM).

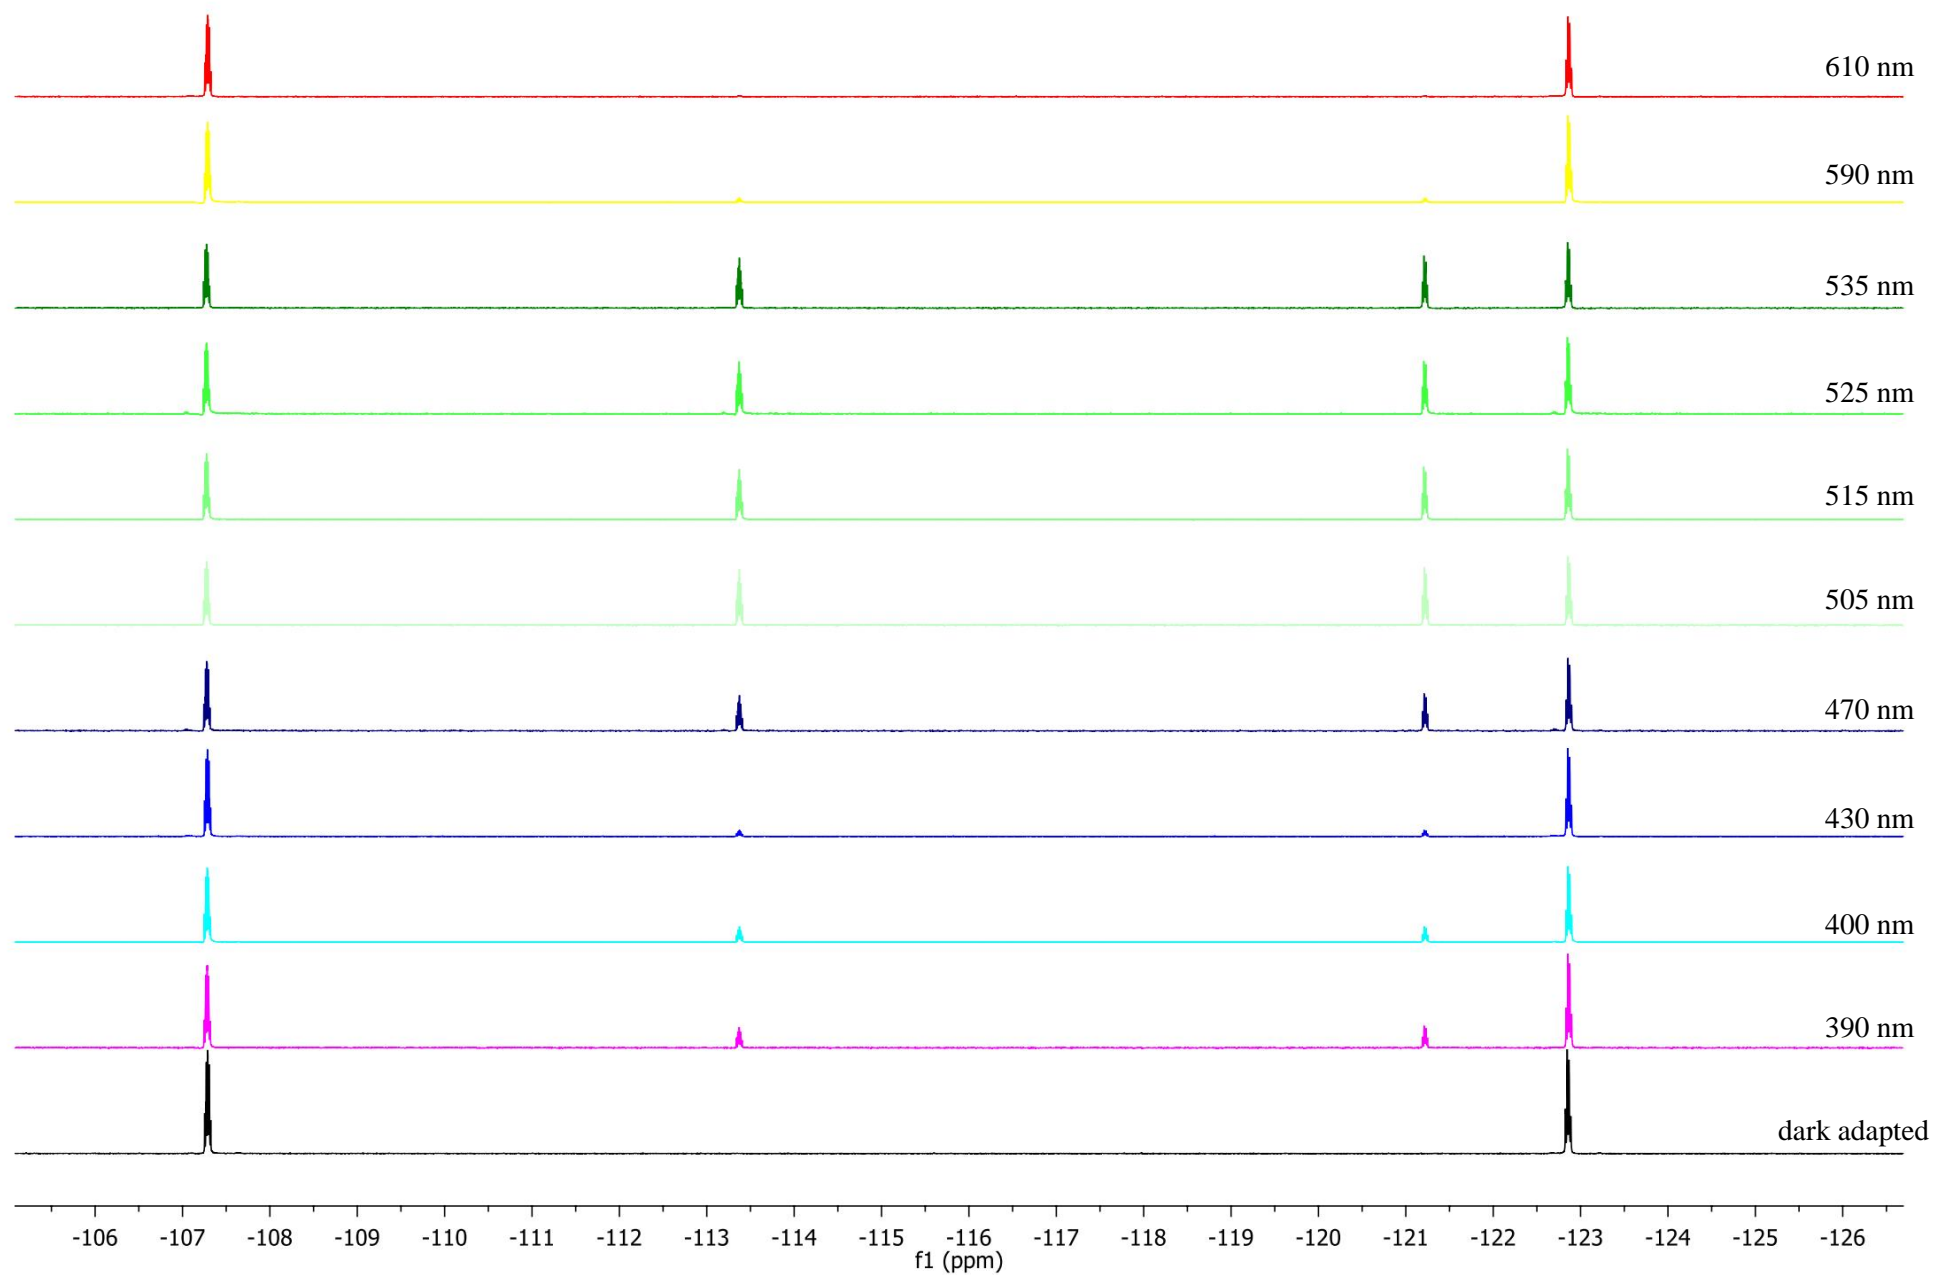

**Figure S12.** Partial  $^{19}\text{F}$  NMR spectra of *m*-3c at dark adapted state and after irradiation with light at different wavelength in DMSO- $\text{d}_6$  ( $c \approx 2$  mM).

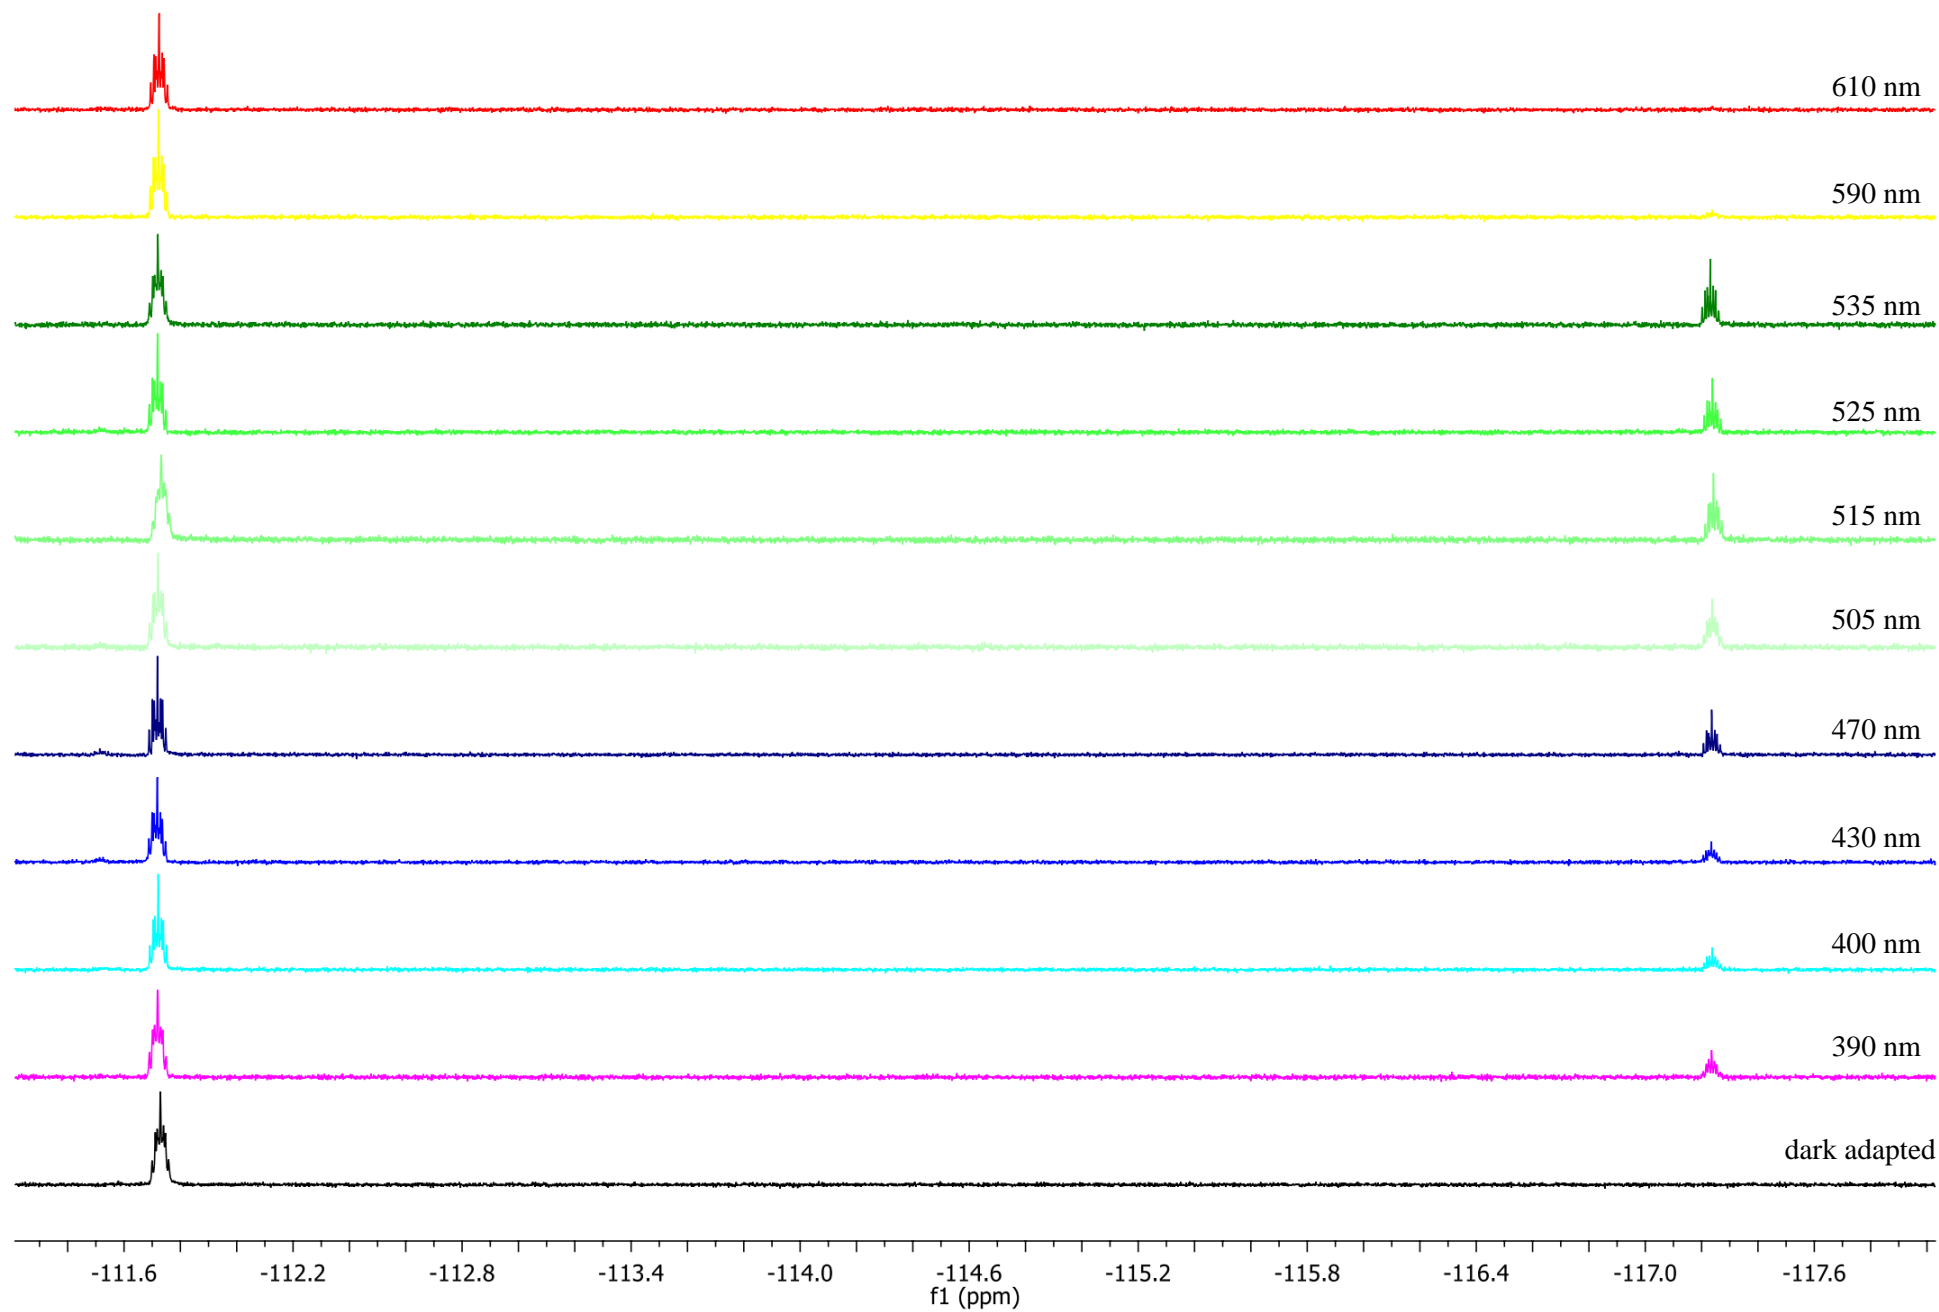

**Figure S13.** Partial  $^{19}\text{F}$  NMR spectra of *m*-**3b** at dark adapted state and after irradiation with light at different wavelength in DMSO- $\text{d}_6$  ( $c \approx 2$  mM).

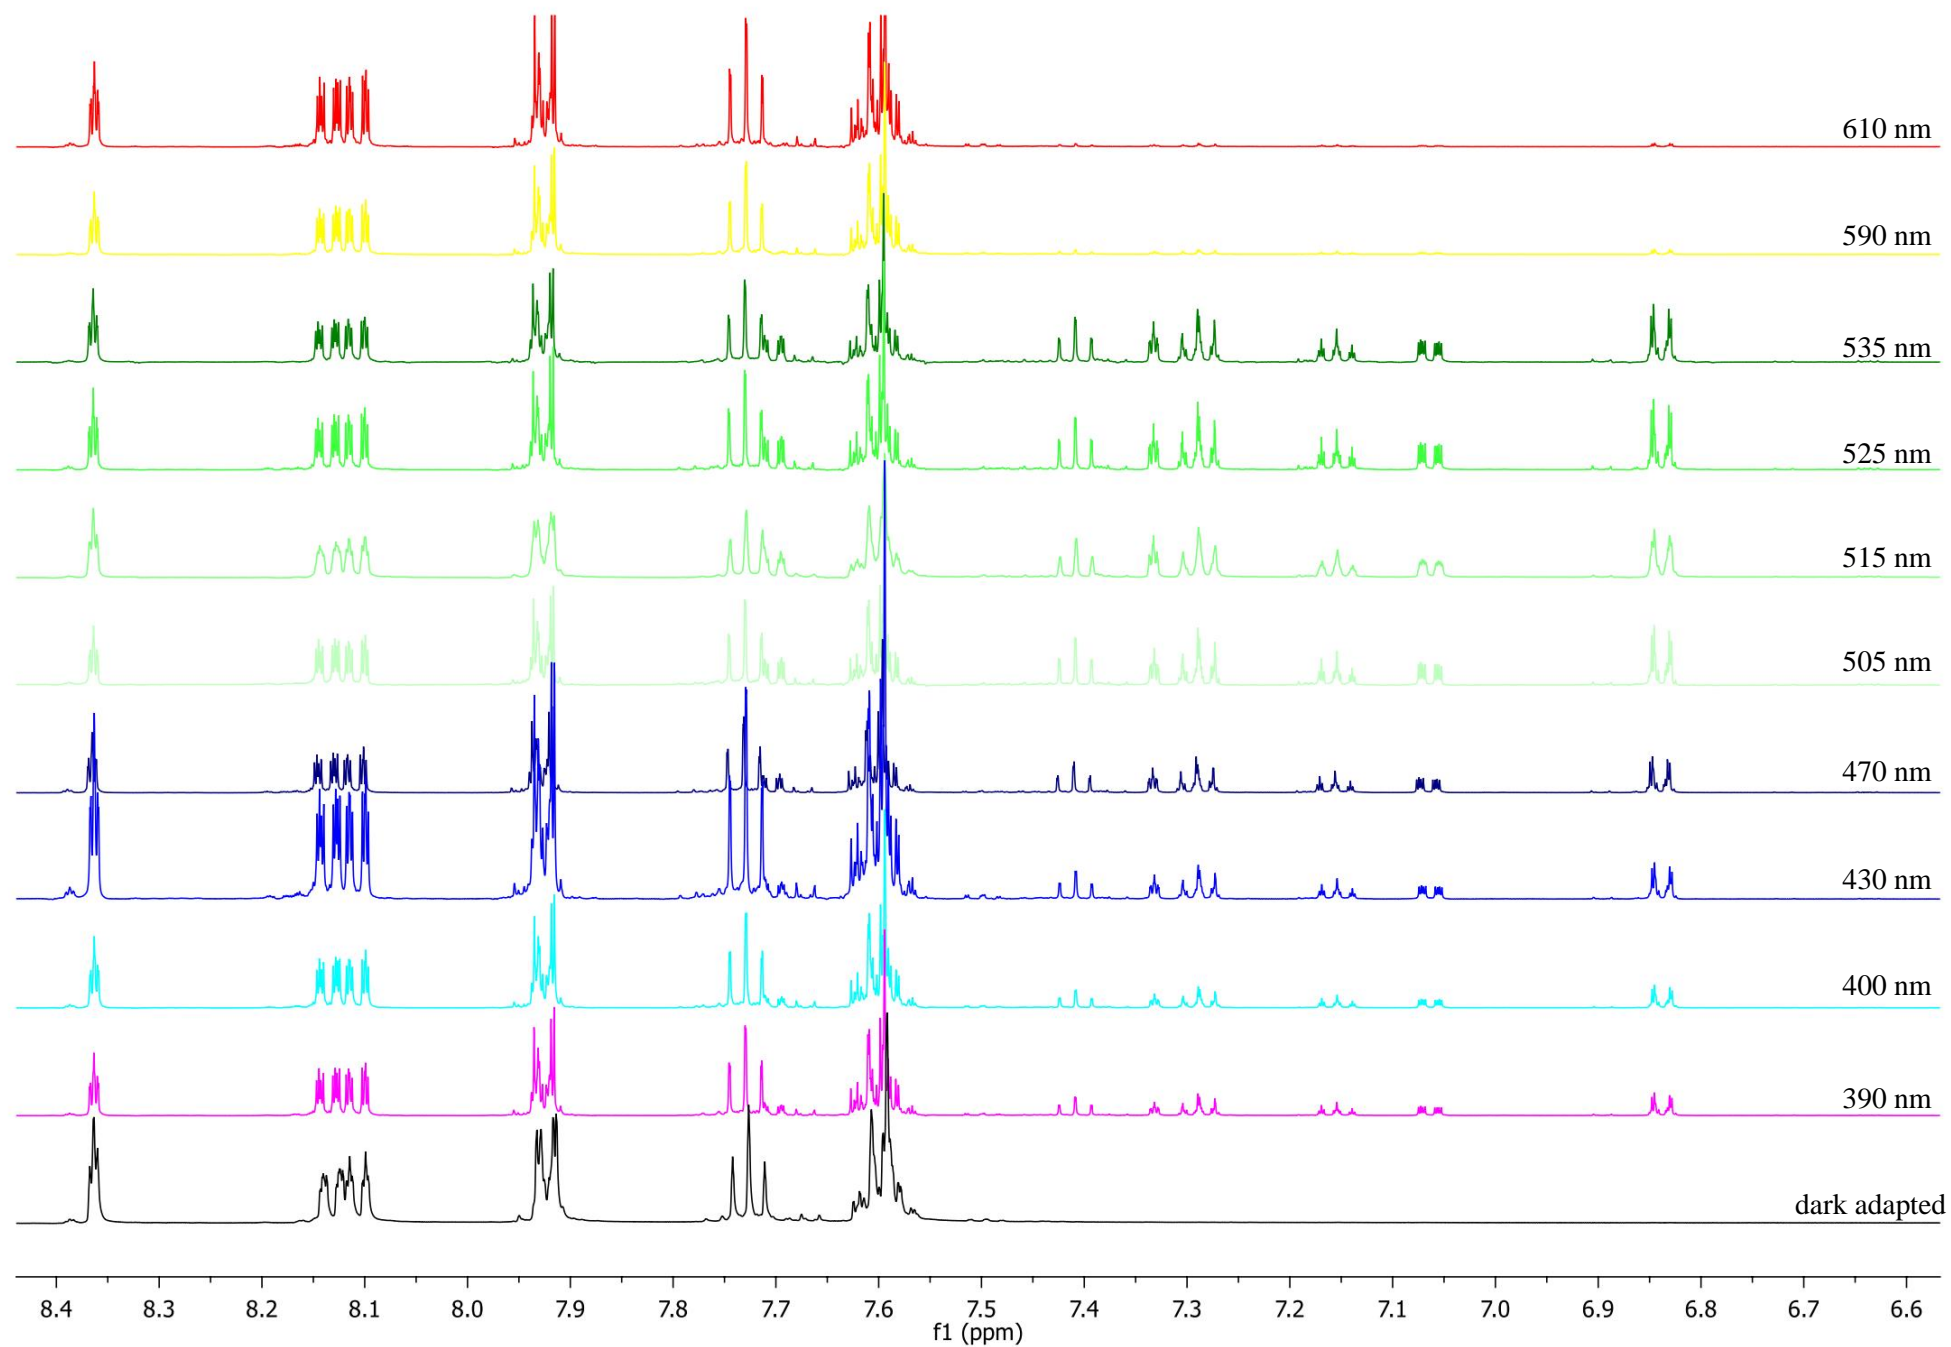

**Figure S14.** Partial  $^1\text{H}$  NMR spectra of *m-3a* at dark adapted state and after irradiation with light at different wavelength in  $\text{DMSO-d}_6$  ( $c \approx 2 \text{ mM}$ ).

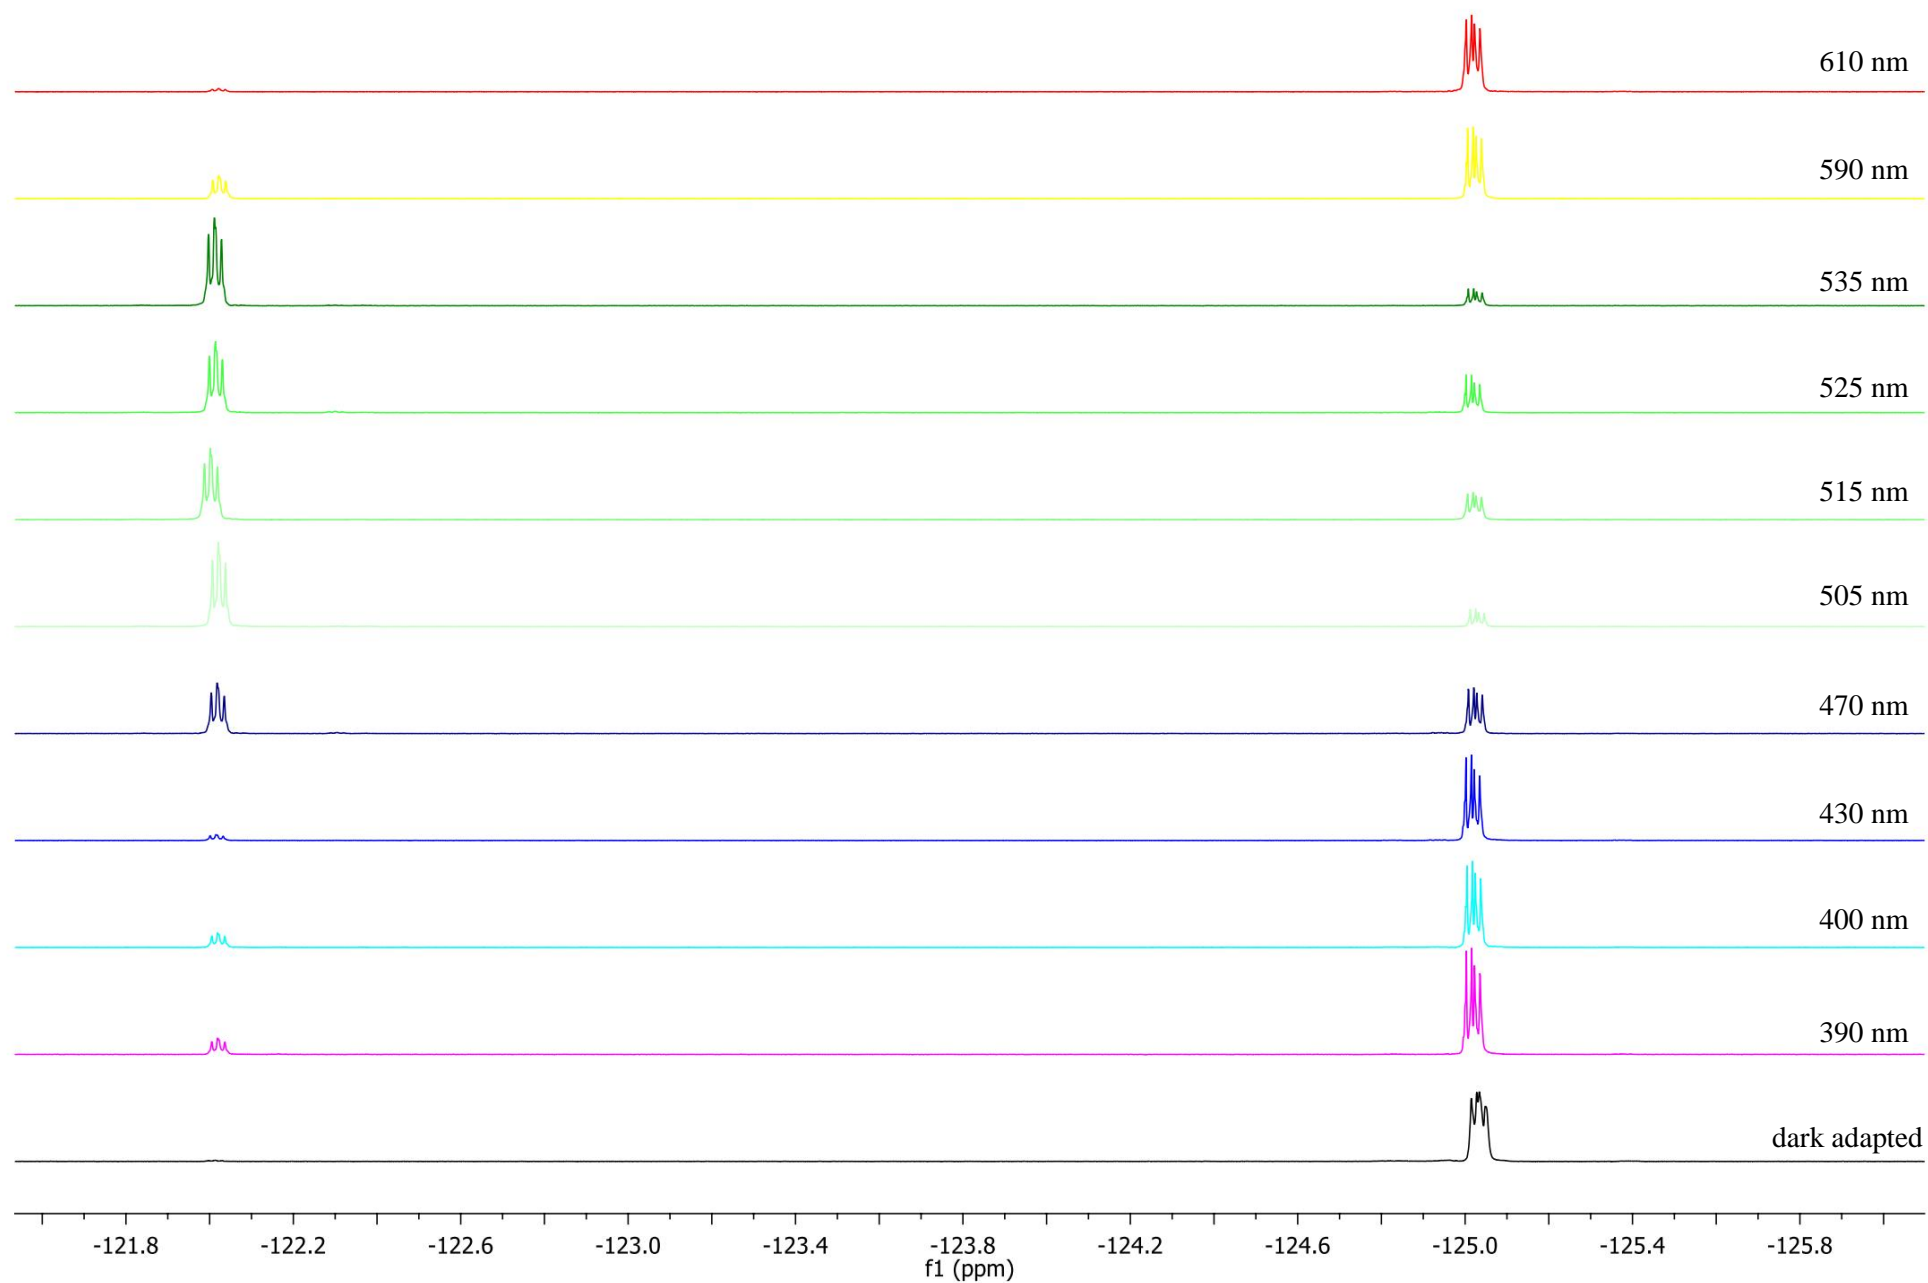

**Figure S15.** Partial  $^{19}\text{F}$  NMR spectra of *o*-**3d** at dark adapted state and after irradiation with light at different wavelength in DMSO- $\text{d}_6$  ( $c \approx 2 \text{ mM}$ ).



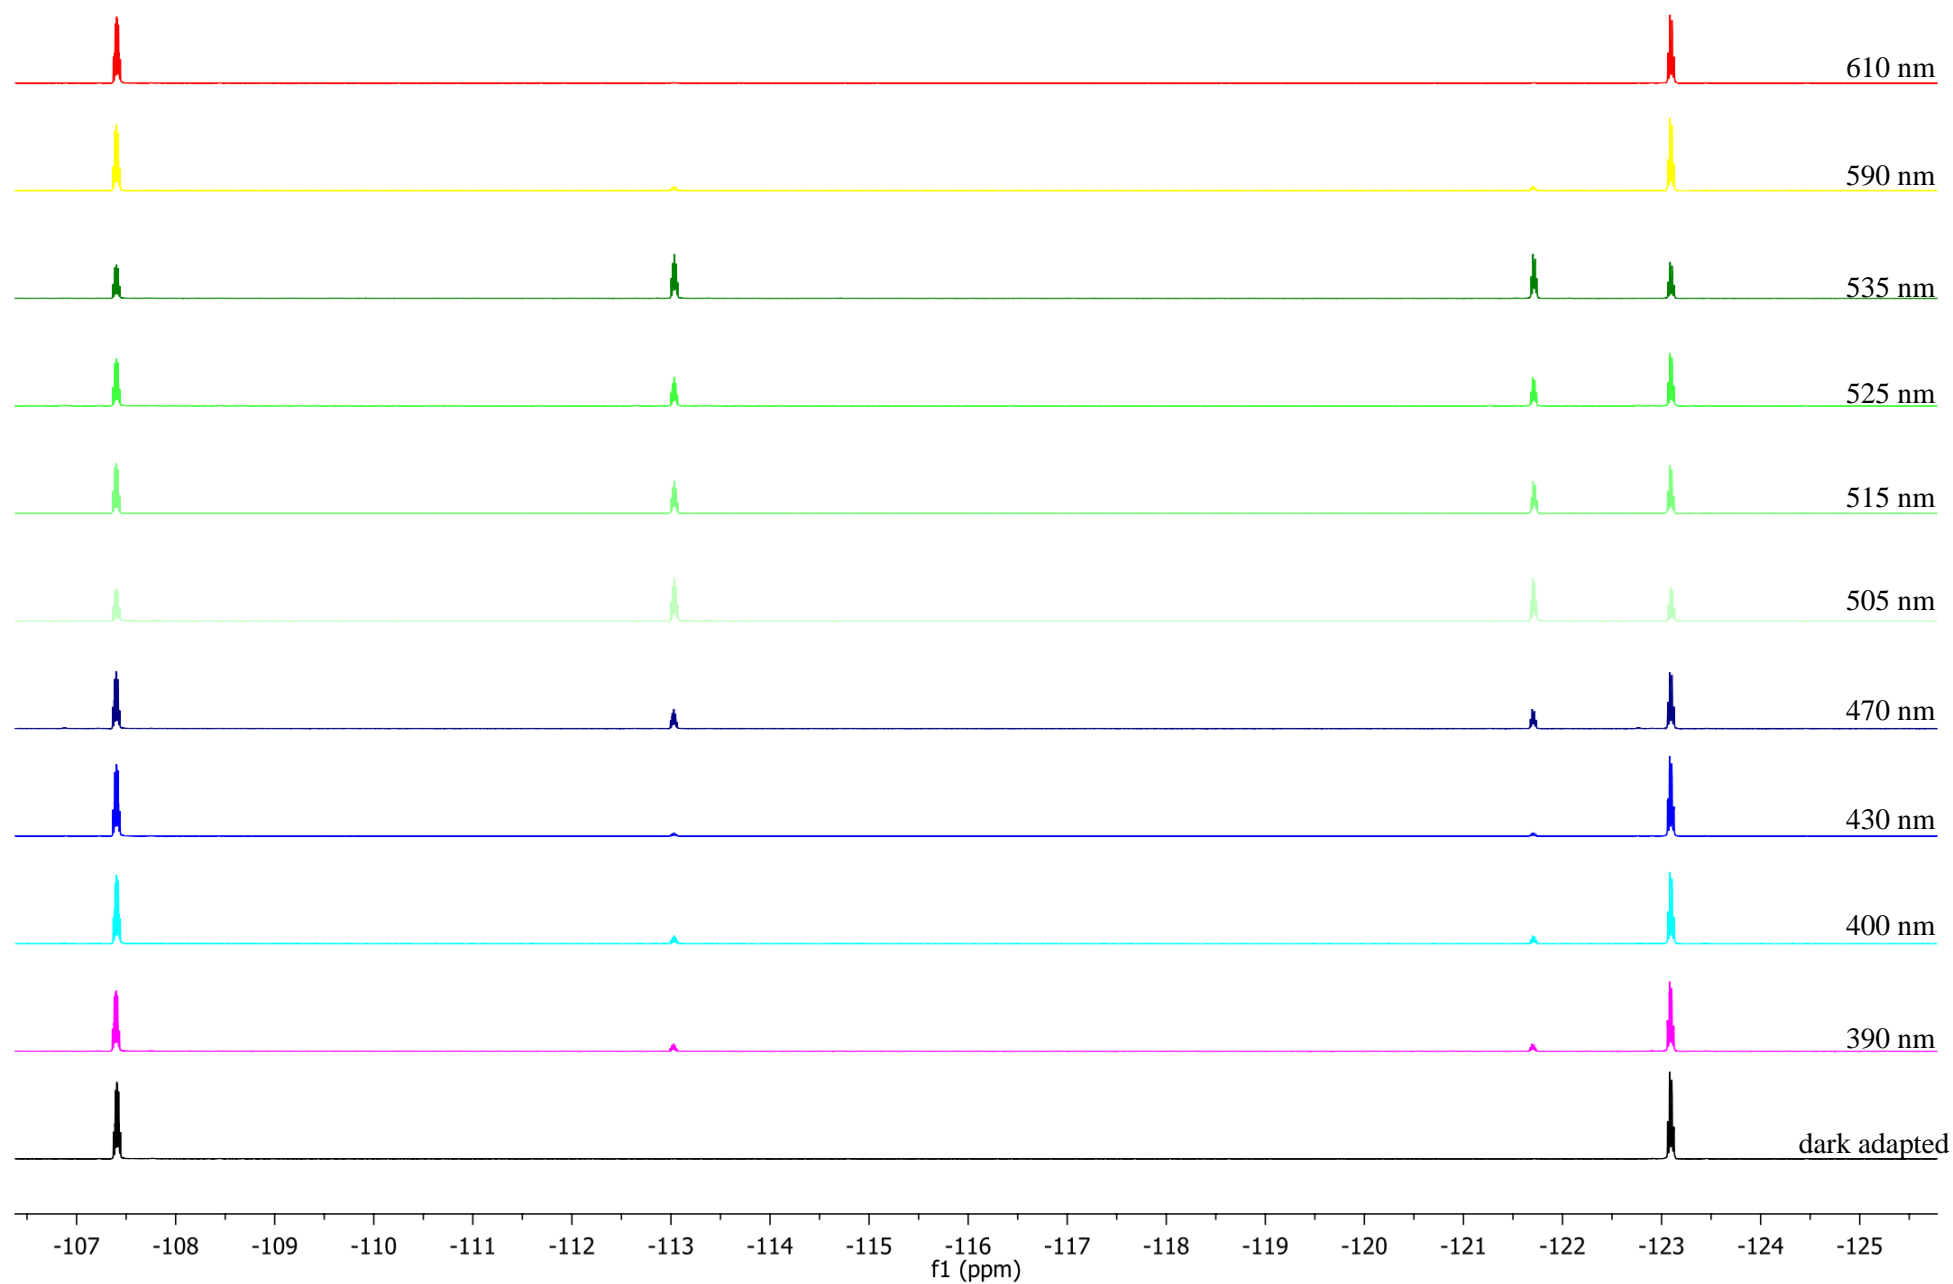

**Figure S16.** Partial  $^{19}\text{F}$  NMR spectra of *o*-**3c** at dark adapted state and after irradiation with light at different wavelength in DMSO- $\text{d}_6$  ( $c \approx 2$  mM).

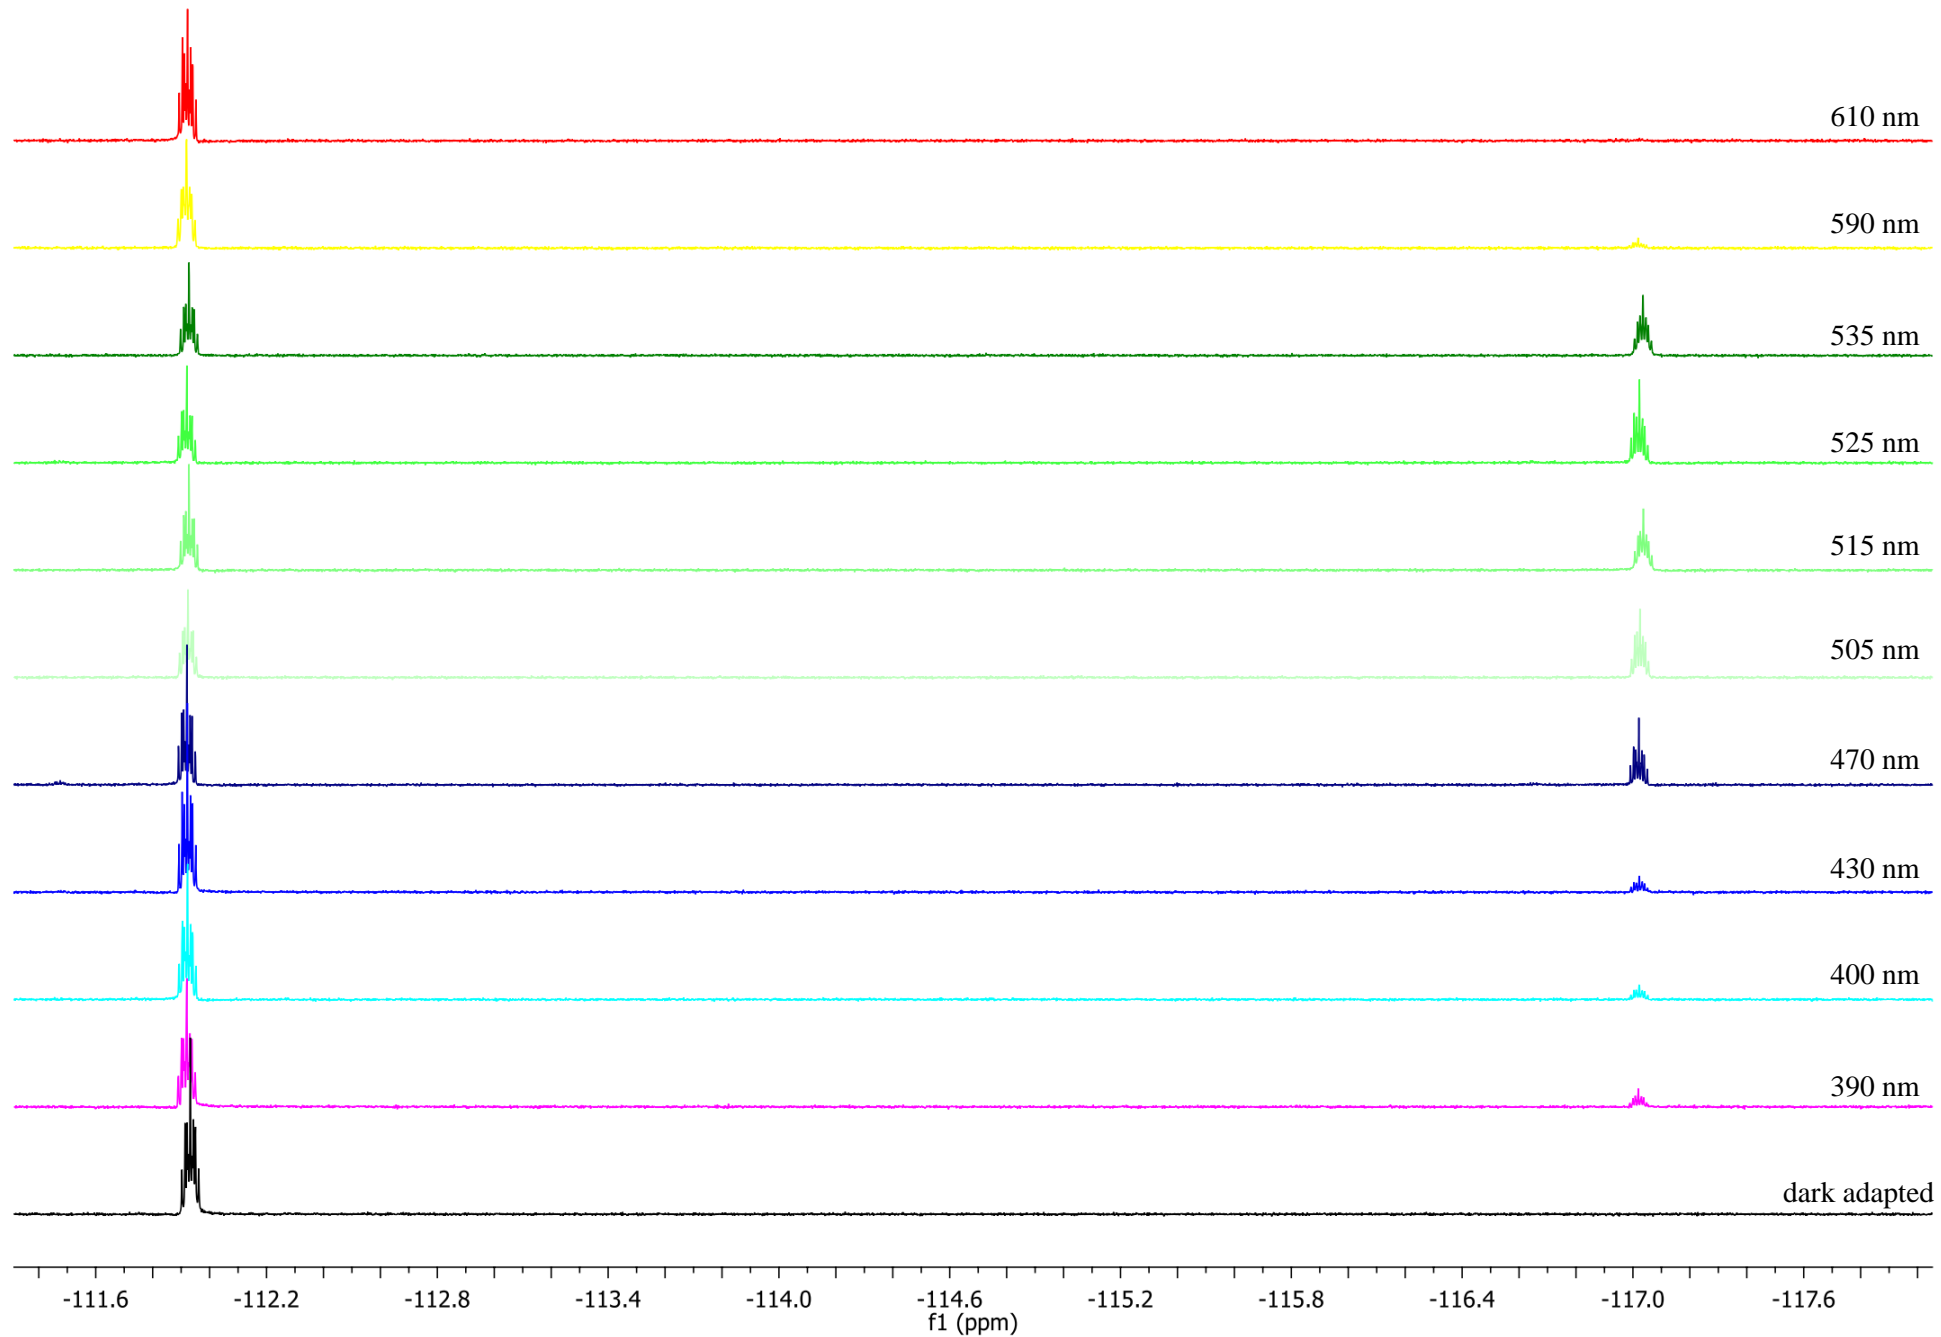

**Figure S17.** Partial  $^{19}\text{F}$  NMR spectra of *o*-**3b** at dark adapted state and after irradiation with light at different wavelength in DMSO- $\text{d}_6$  ( $c \approx 2 \text{ mM}$ ).

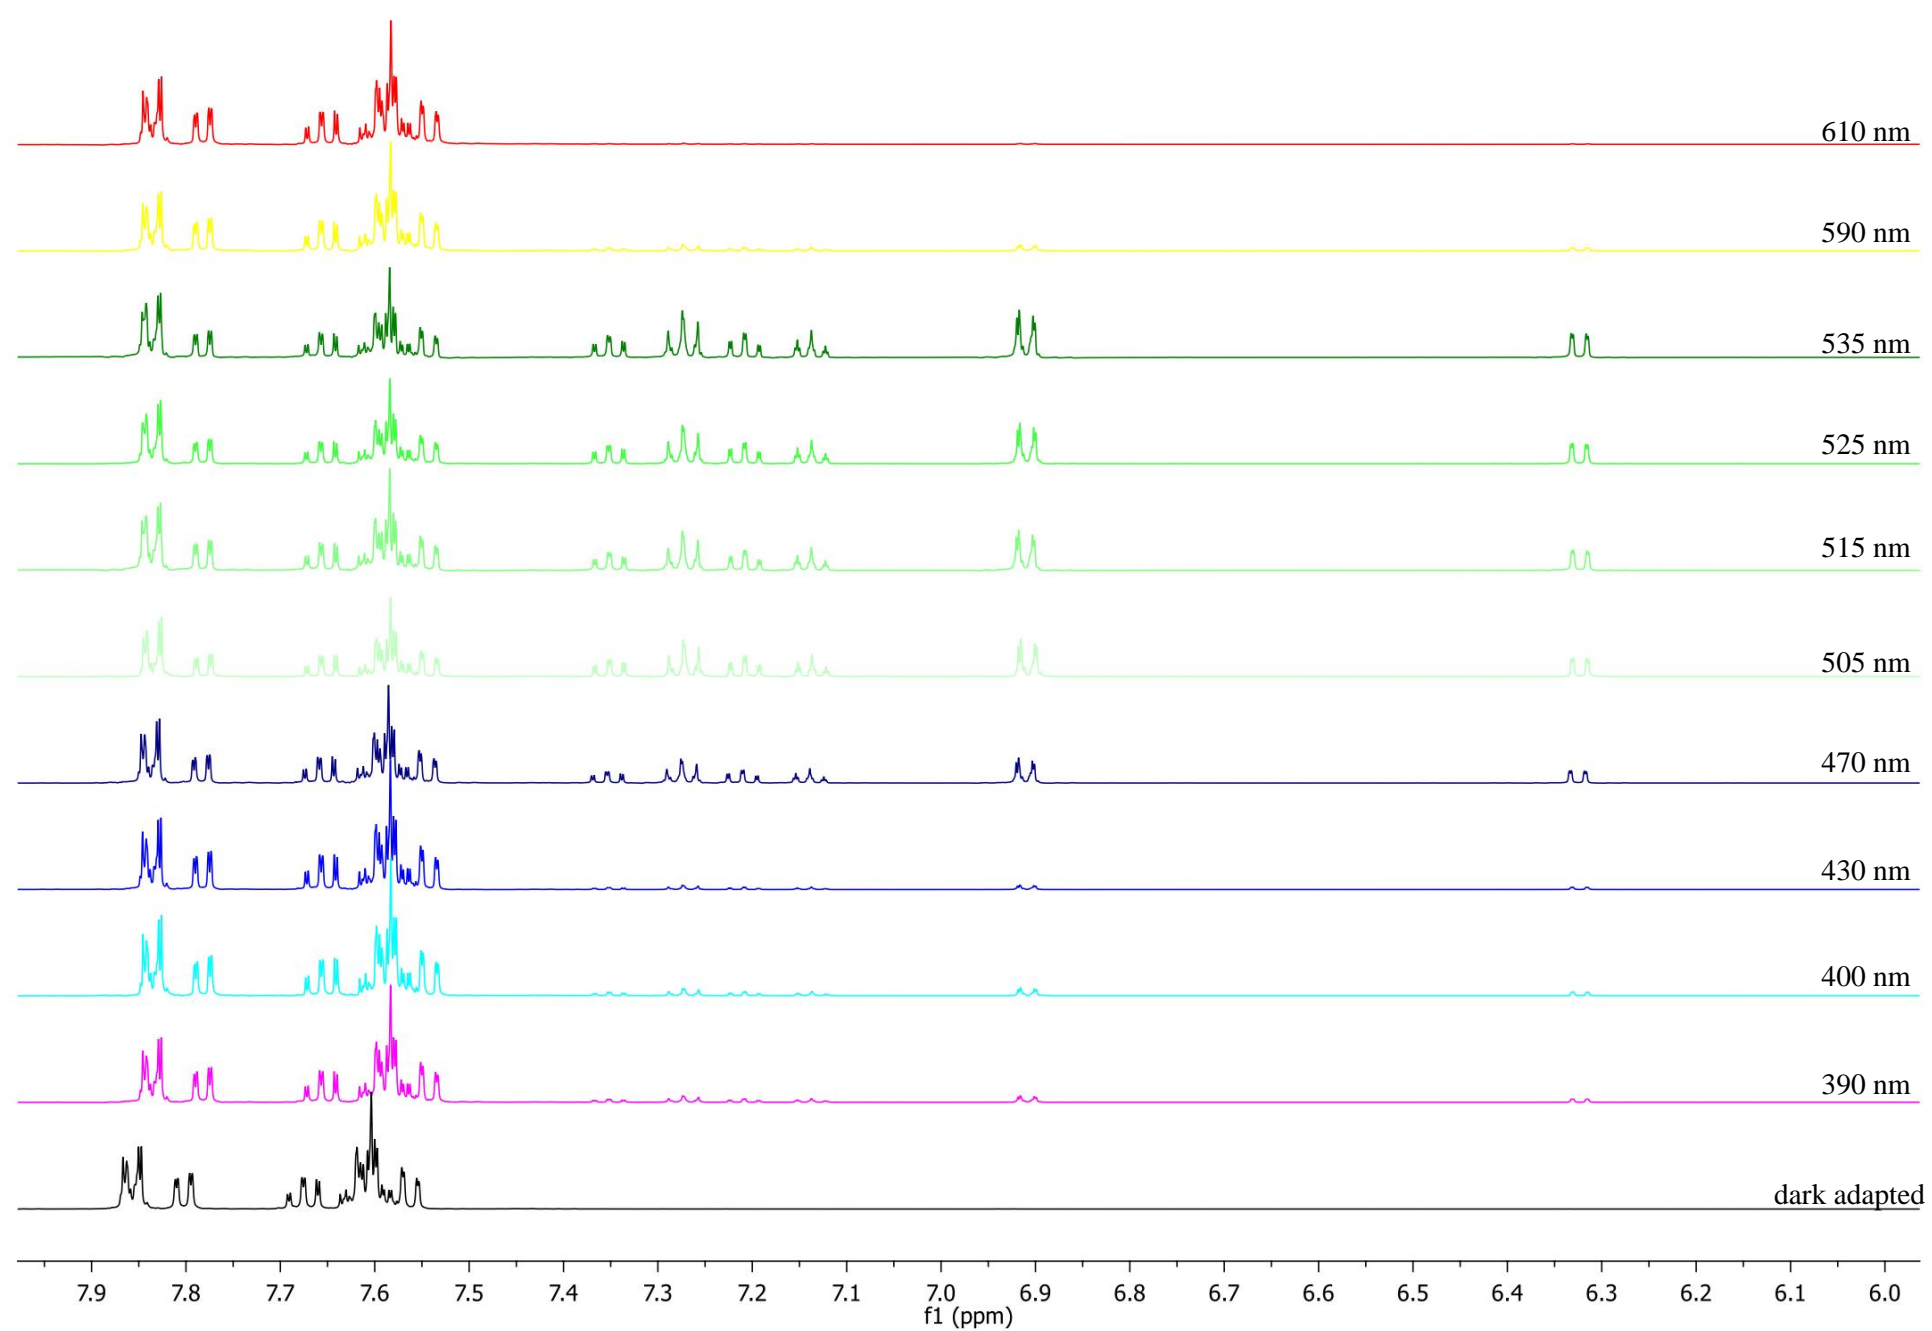

**Figure S18.** Partial  $^1\text{H}$  NMR spectra of *o*-3a at dark adapted state and after irradiation with light at different wavelength in DMSO- $\text{d}_6$  ( $c \approx 2$  mM).

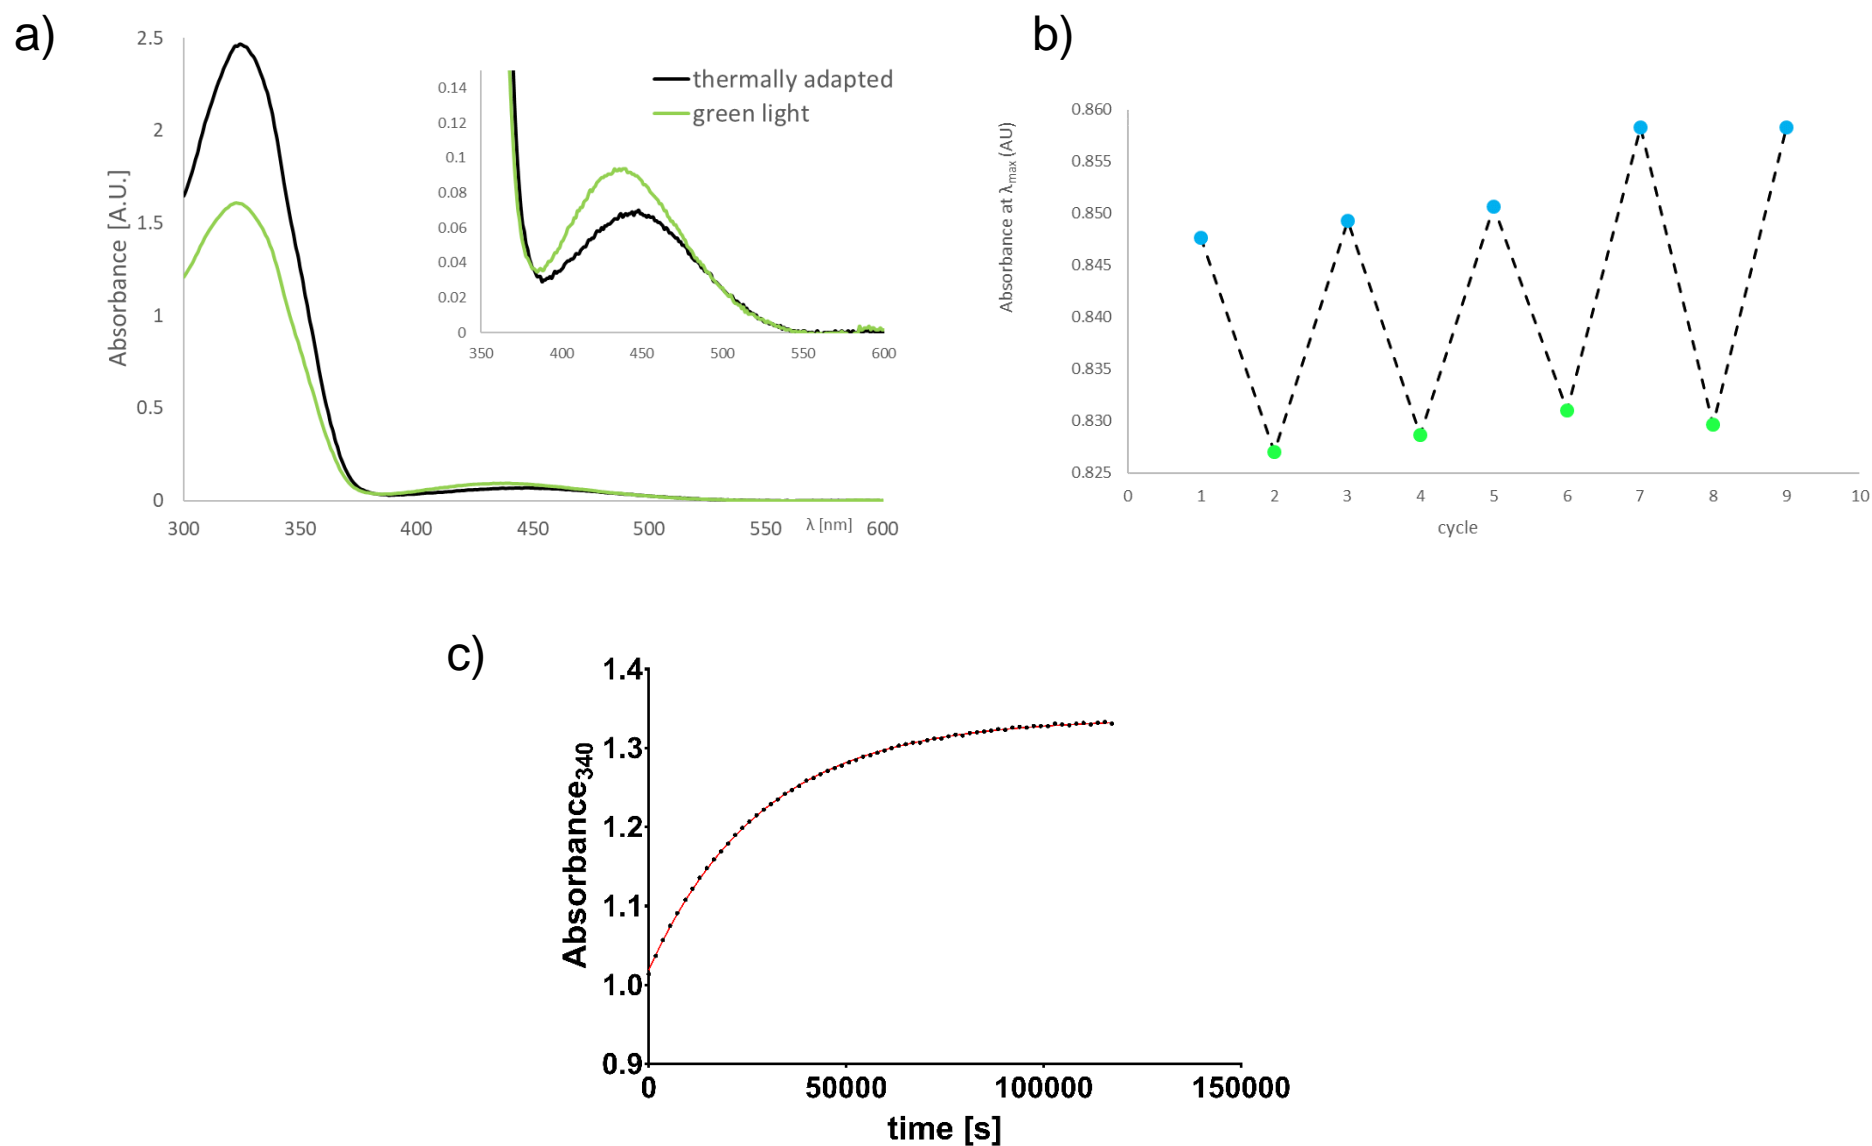

**Figure S19.** (a) UV-Vis absorption spectra of thermally adapted and green light irradiated 500  $\mu\text{M}$  *o*-3a in DMSO. (b) Multiple photoswitching rounds of 50  $\mu\text{M}$  *o*-3a in DMSO by pulsed green and blue light illumination. (c) Lifetime plot of *o*-3a based on following UV-Vis absorbance over time after irradiation with 535 nm light (37 °C, DMSO).

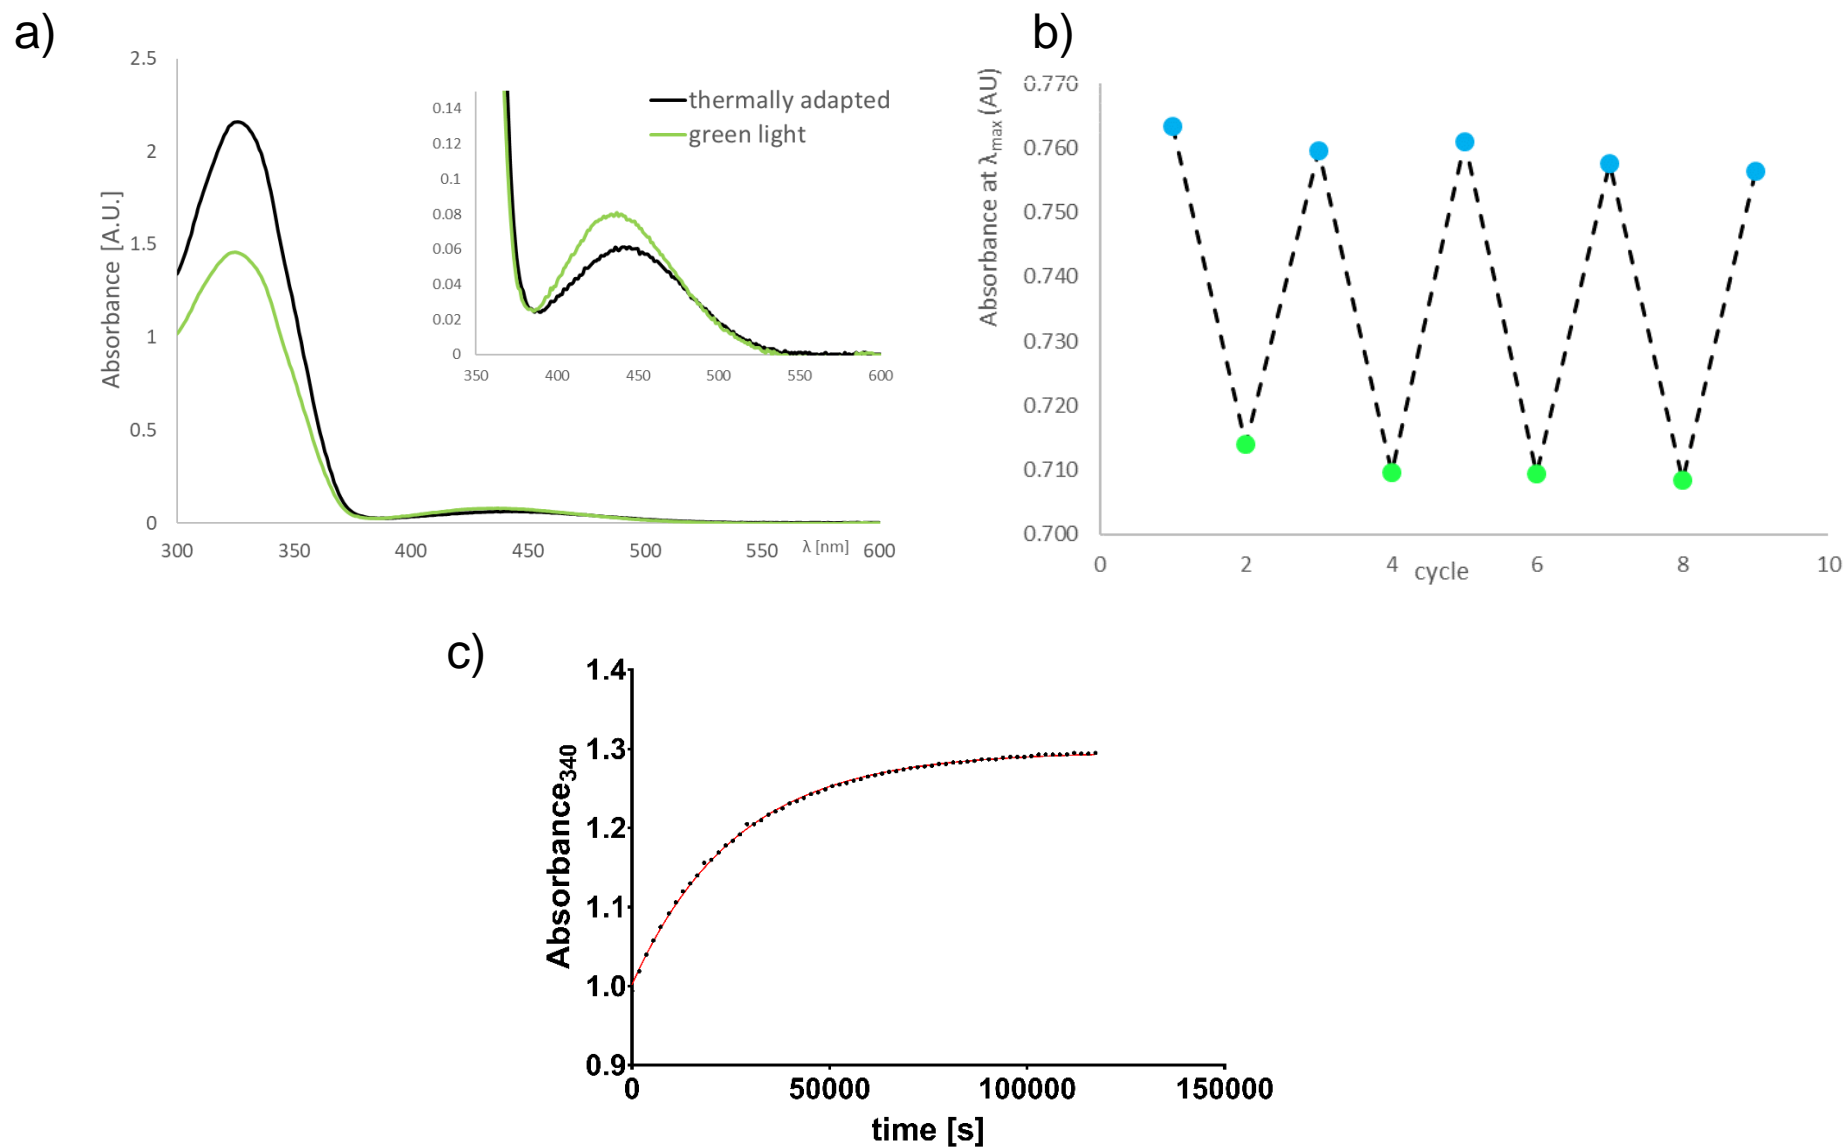

**Figure S20.** (a) UV-Vis absorption spectra of thermally adapted and green light irradiated 500  $\mu\text{M}$  *o*-3b in DMSO. (b) Multiple photoswitching rounds of 50  $\mu\text{M}$  *o*-3b in DMSO by pulsed green and blue light illumination. (c) Lifetime plot of *o*-3b based on following UV-Vis absorbance over time after irradiation with 530 nm light (37  $^{\circ}\text{C}$ , DMSO).

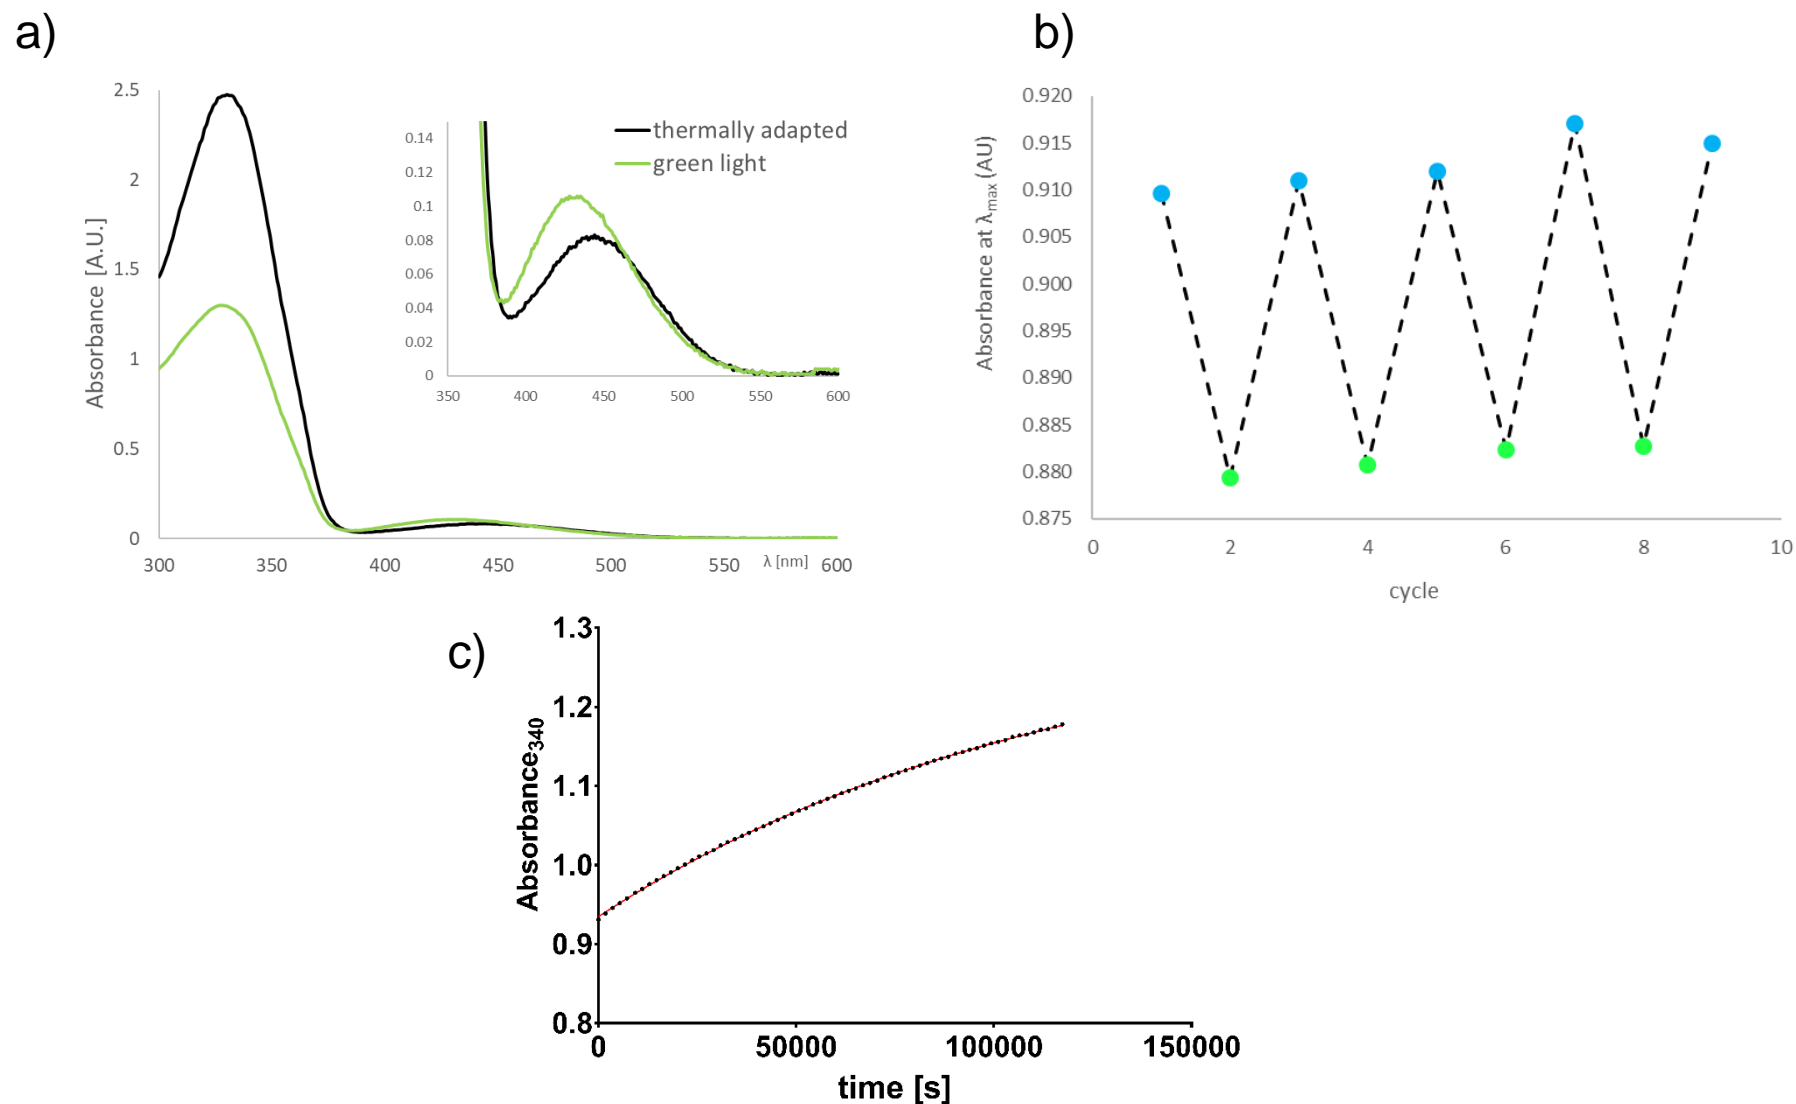

**Figure S21.** (a) UV-Vis absorption spectra of thermally adapted and green light irradiated 500  $\mu\text{M}$  *o*-3c in DMSO. (b) Multiple photoswitching rounds of 50  $\mu\text{M}$  *o*-3c in DMSO by pulsed green and blue light illumination. (c) Lifetime plot of *o*-3c based on following UV-Vis absorbance over time after irradiation with 530 nm light (37  $^{\circ}\text{C}$ , DMSO).

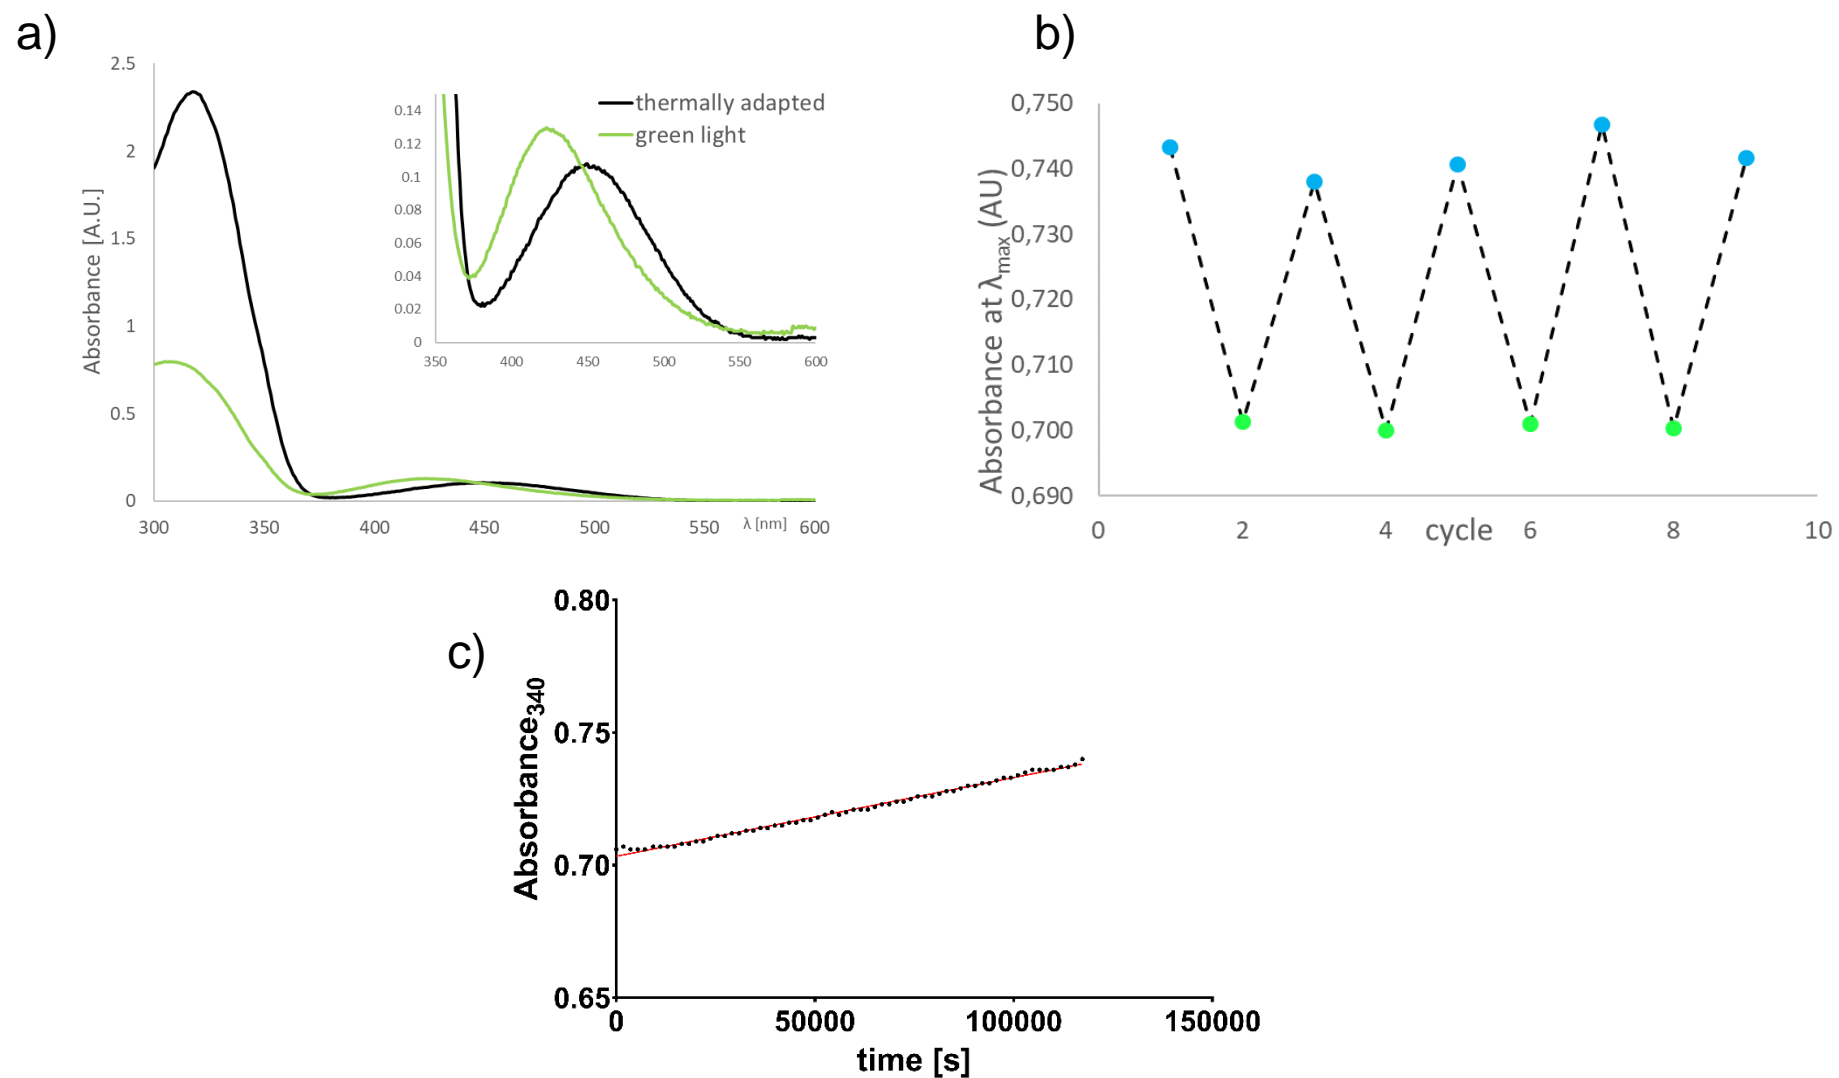

**Figure S22.** (a) UV-Vis absorption spectra of thermally adapted and green light irradiated 500  $\mu\text{M}$  *o*-3d in DMSO. (b) Multiple photoswitching rounds of 50  $\mu\text{M}$  *o*-3d in DMSO by pulsed green and blue light illumination. (c) Lifetime plot of *o*-3d based on following UV-Vis absorbance over time after irradiation with 530 nm light (37 °C, DMSO).

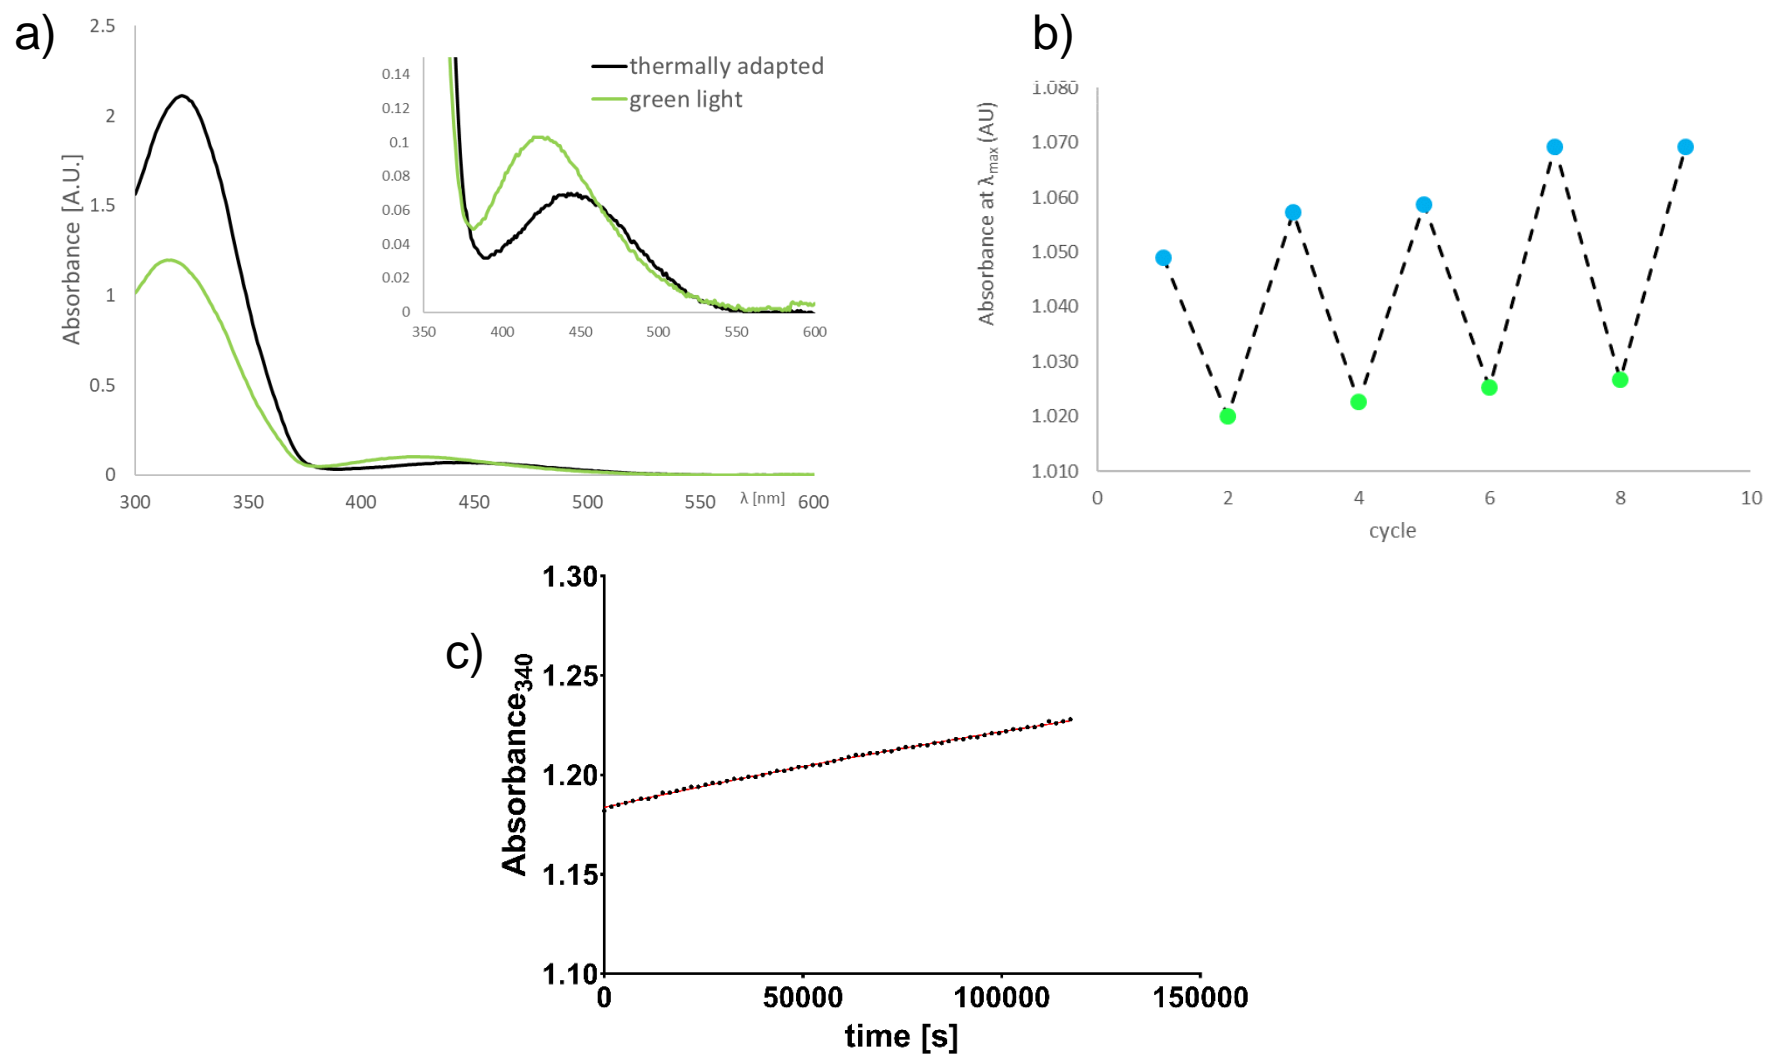

**Figure S23.** (a) UV-Vis absorption spectra of thermally adapted and green light irradiated 500  $\mu\text{M}$  *m-3a* in DMSO. (b) Multiple photoswitching rounds of 50  $\mu\text{M}$  *m-3a* in DMSO by pulsed green and blue light illumination. (c) Lifetime plot of *m-3a* based on following UV-Vis absorbance over time after irradiation with 530 nm light (37 °C, DMSO)



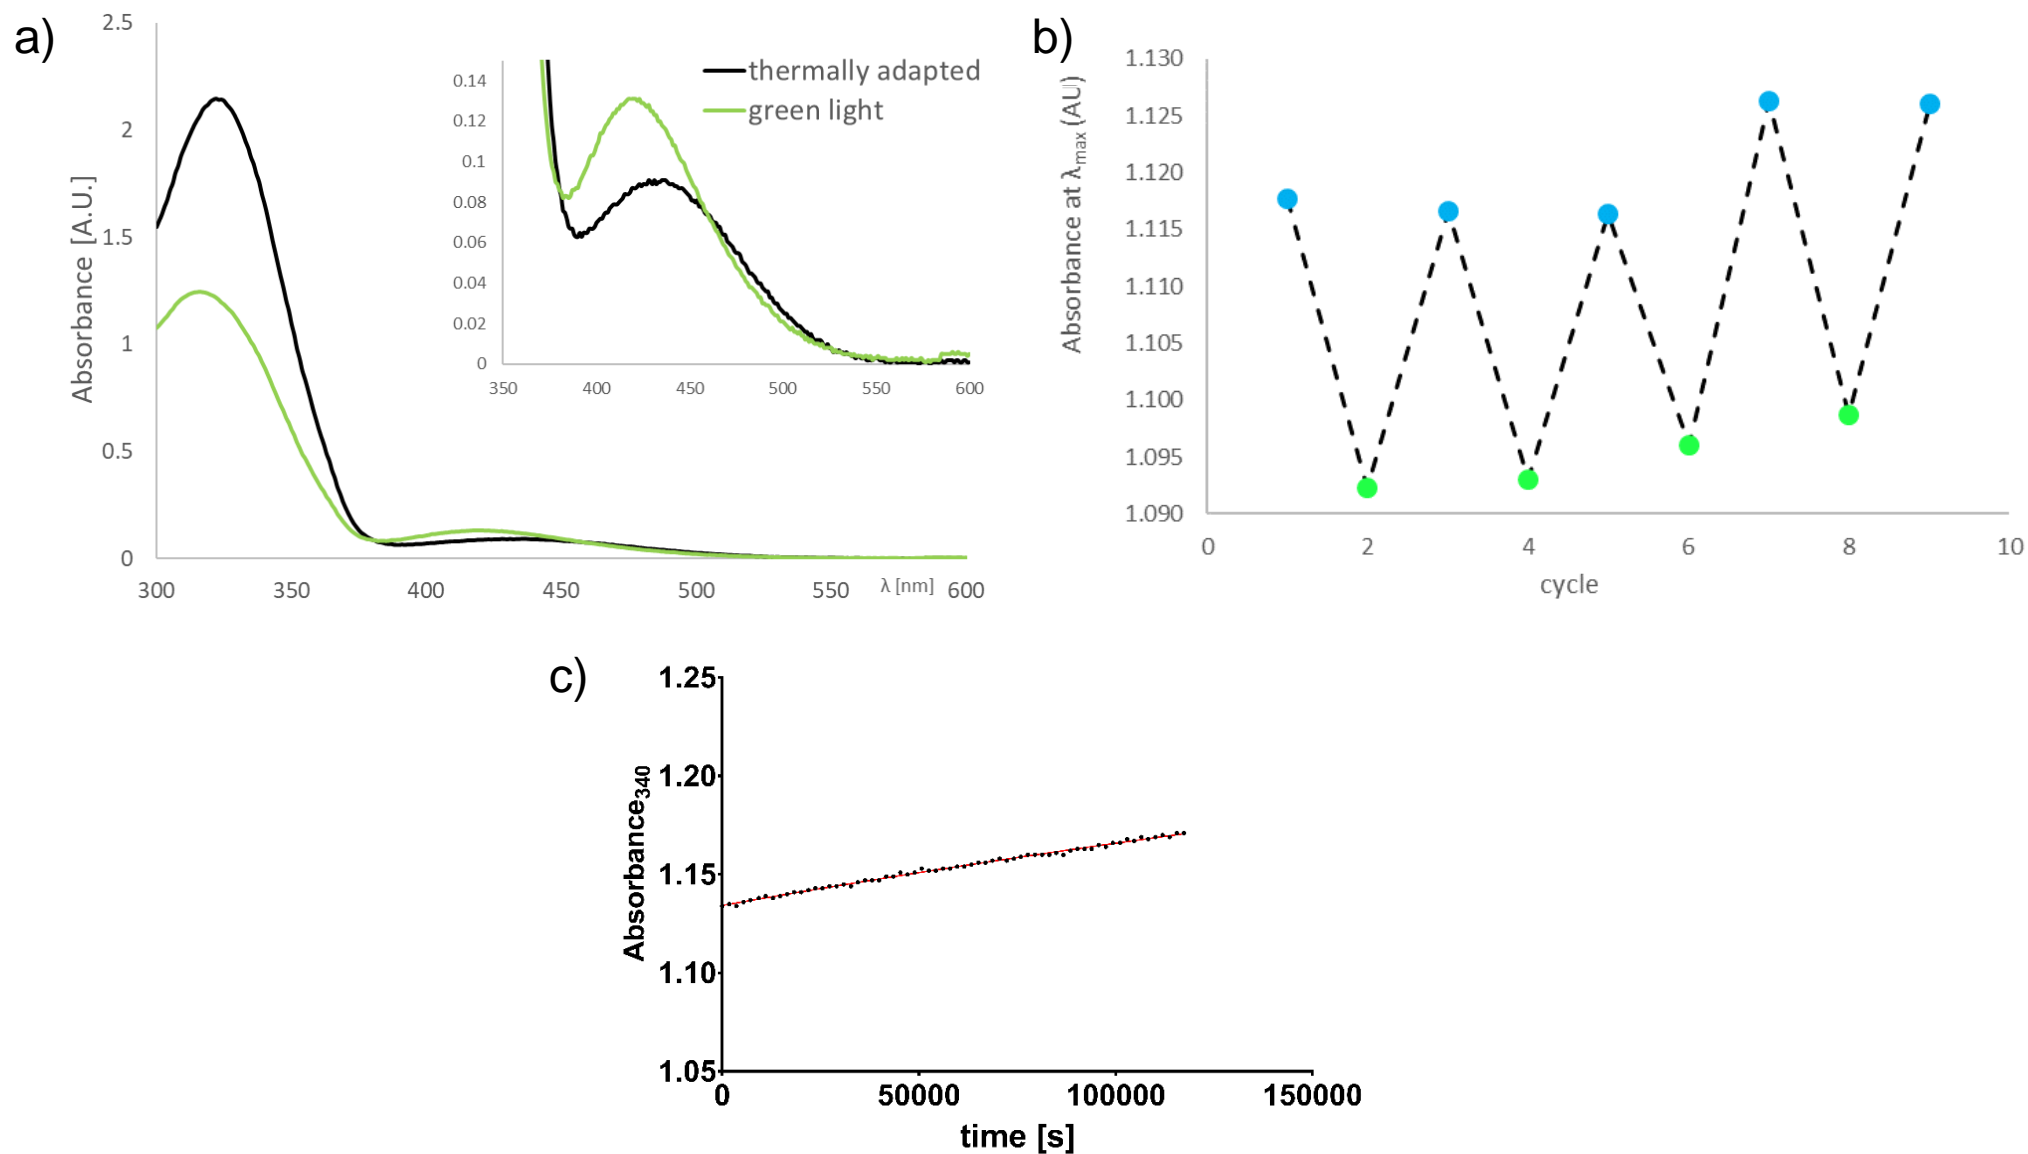

**Figure S24.** (a) UV-Vis absorption spectra of thermally adapted and green light irradiated 500  $\mu\text{M}$  *m-3b* in DMSO. (b) Multiple photoswitching rounds of 50  $\mu\text{M}$  *m-3b* in DMSO by pulsed green and blue light illumination. (c) Lifetime plot of *m-3b* based on following UV-Vis absorbance over time after irradiation with 530 nm light (37  $^{\circ}\text{C}$ , DMSO)

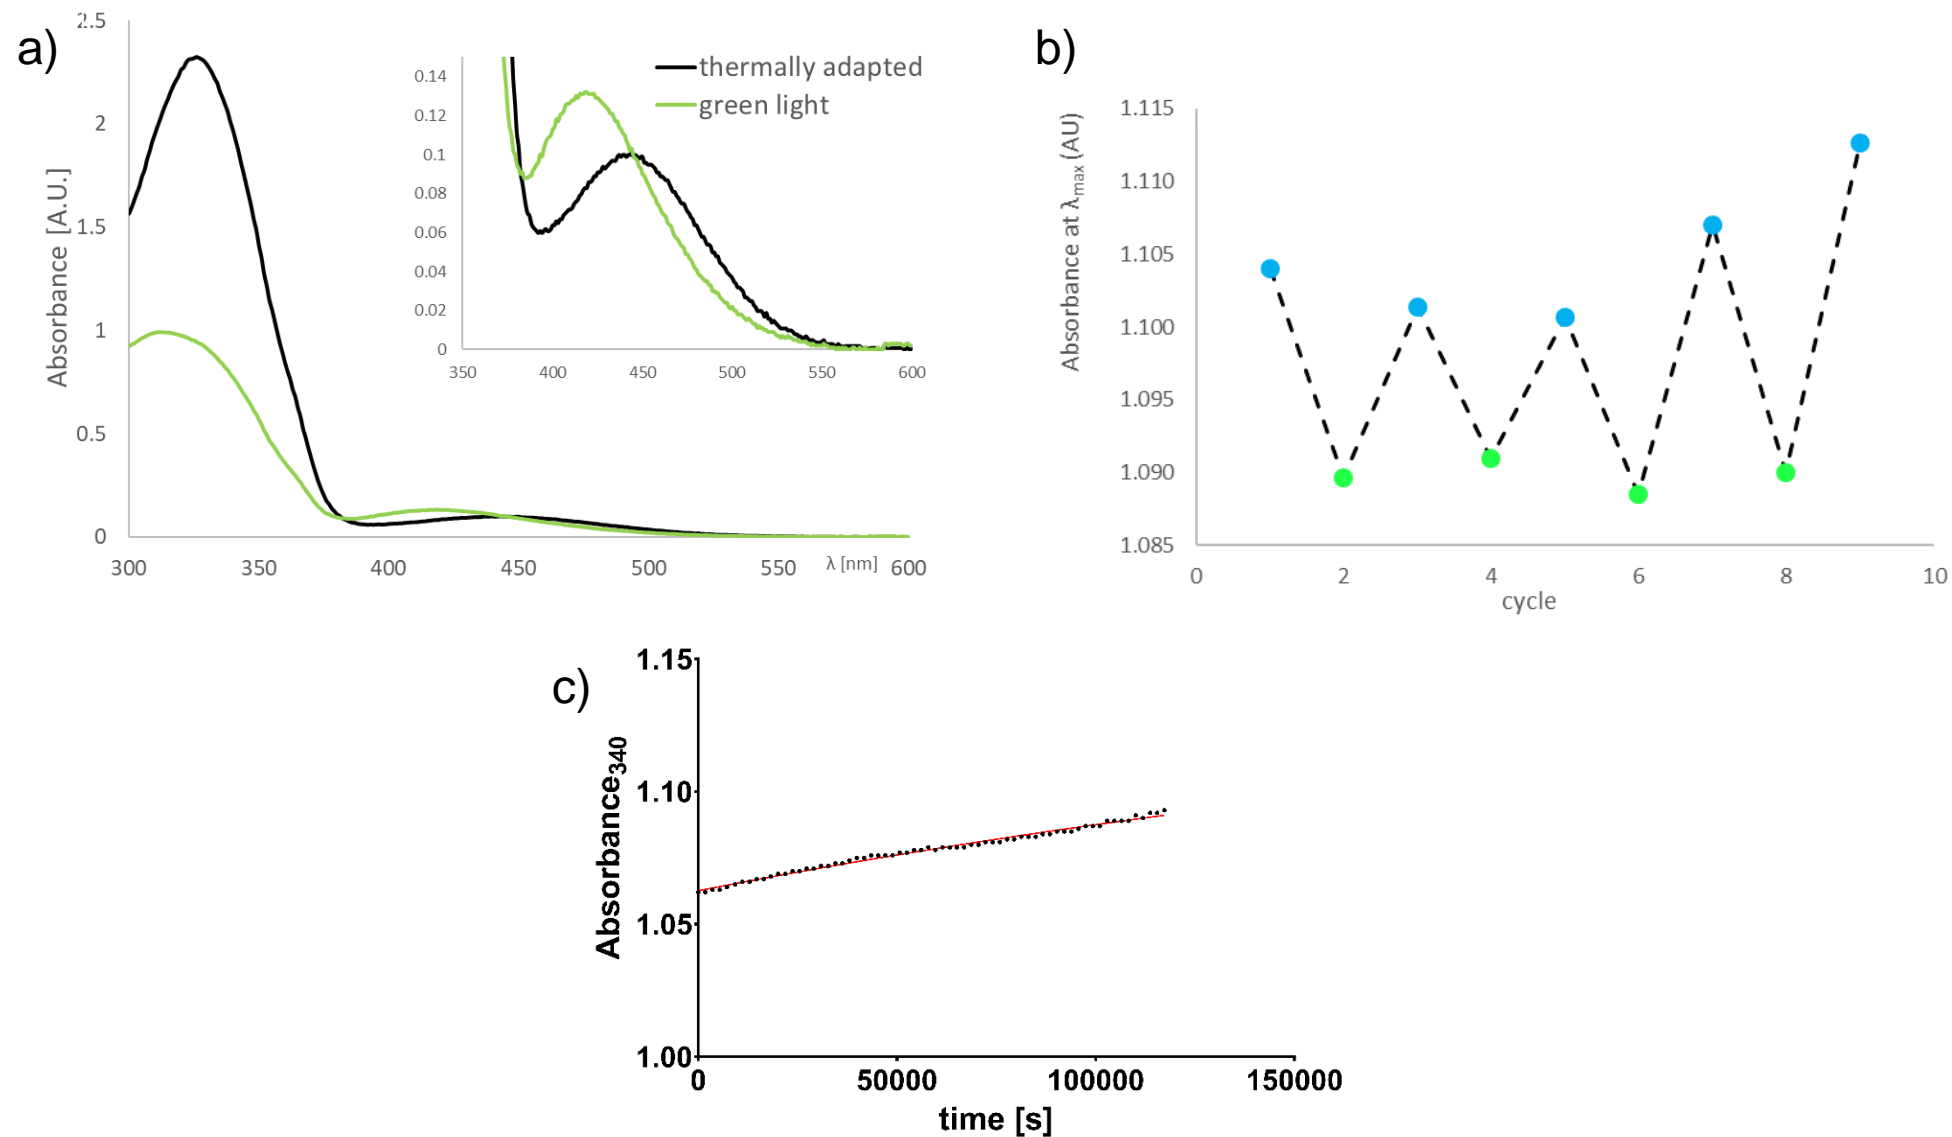

**Figure S25.** (a) UV-Vis absorption spectra of thermally adapted and green light irradiated 500  $\mu\text{M}$  *m*-3c in DMSO. (b) Multiple photoswitching rounds of 50  $\mu\text{M}$  *m*-3c in DMSO by pulsed green and blue light illumination. (c) Lifetime plot of *m*-3c based on following UV-Vis absorbance over time after irradiation with 530 nm light (37  $^{\circ}\text{C}$ , DMSO)

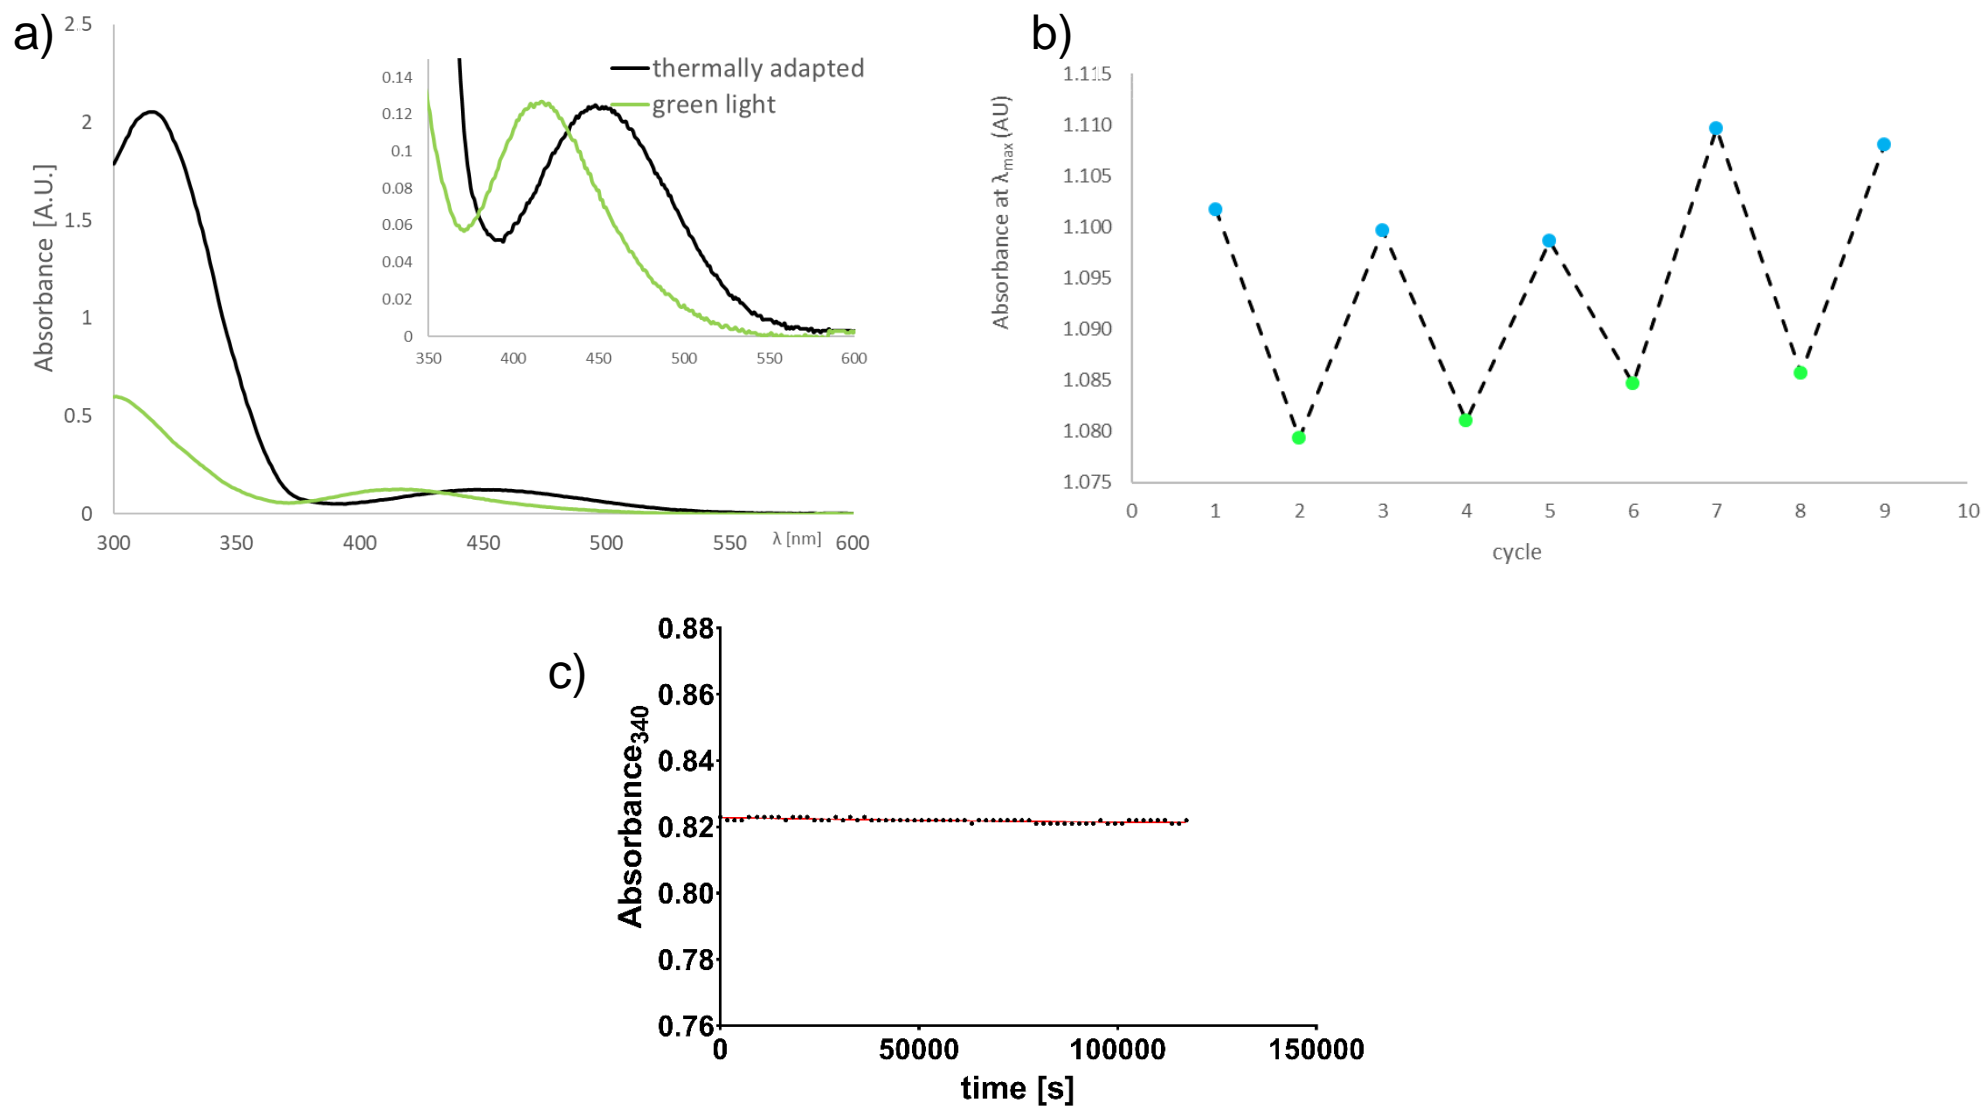

**Figure S26.** (a) UV-Vis absorption spectra of thermally adapted and green light irradiated 500  $\mu\text{M}$  *m-3d* in DMSO. (b) Multiple photoswitching rounds of 50  $\mu\text{M}$  *m-3d* in DMSO by pulsed green and blue light illumination. (c) Lifetime plot of *m-3d* based on following UV-Vis absorbance over time after irradiation with 530 nm light (37 °C, DMSO)

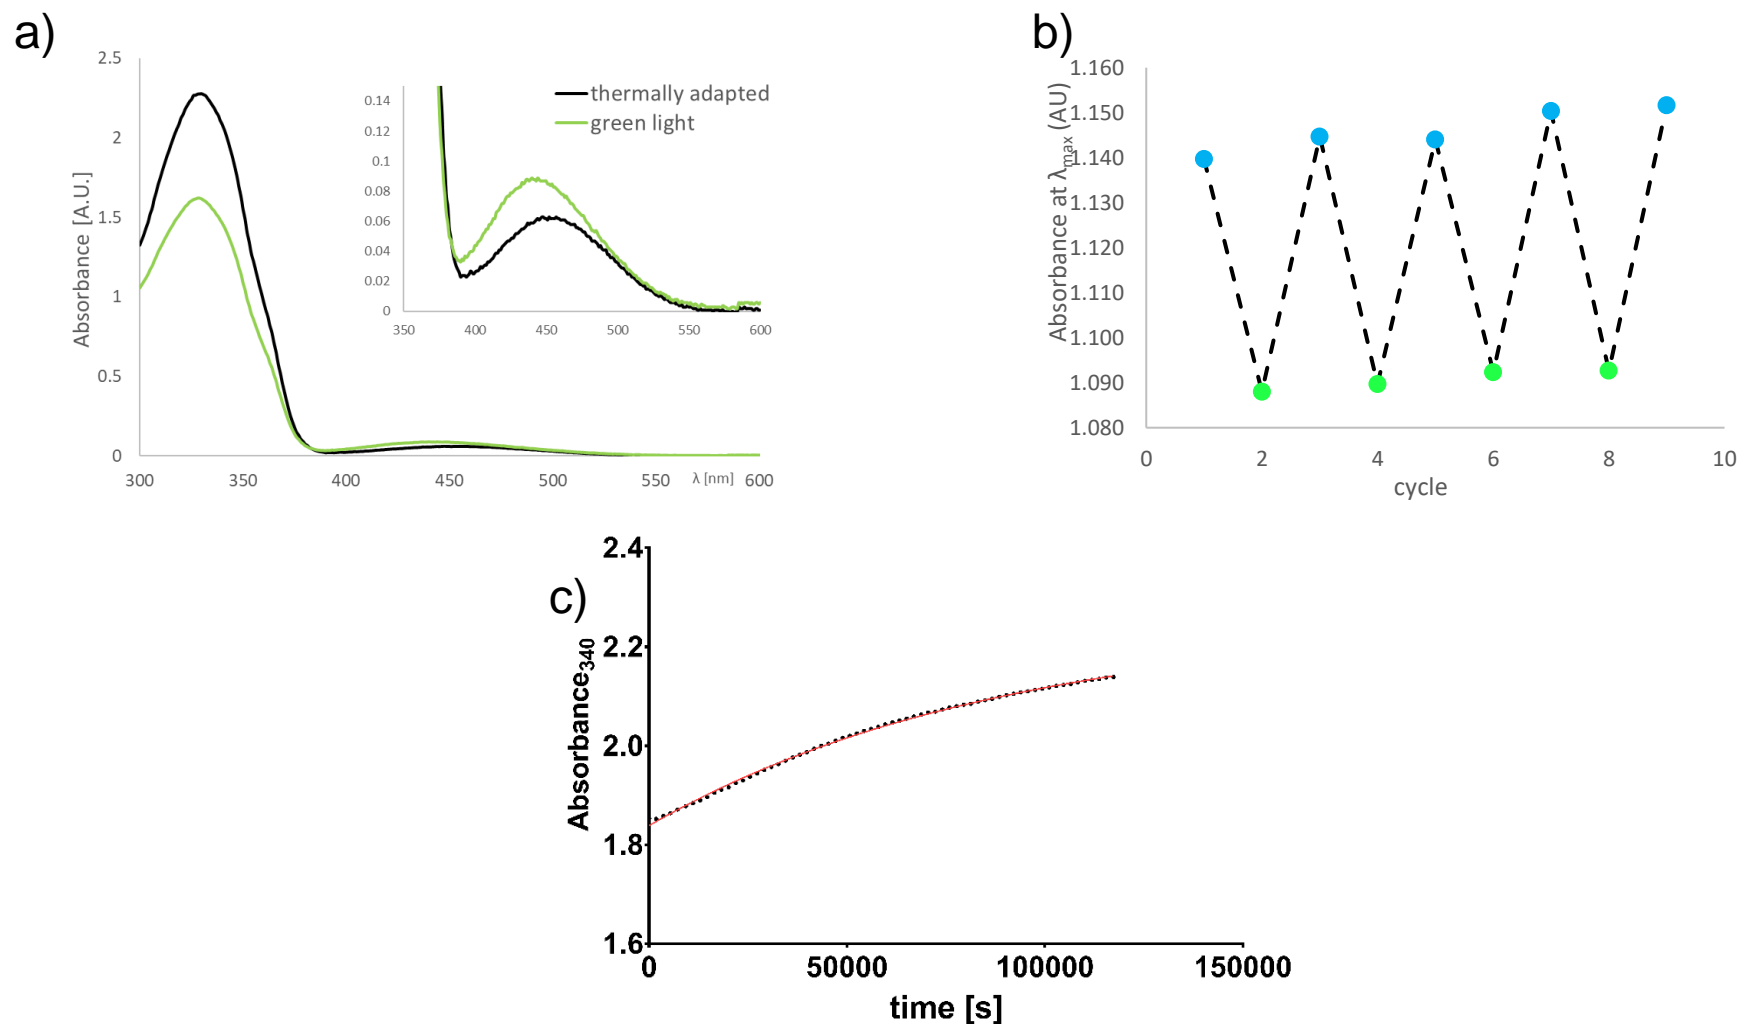

**Figure S27.** (a) UV-Vis absorption spectra of thermally adapted and green light irradiated 500  $\mu\text{M}$  *p*-3a in DMSO. (b) Multiple photoswitching rounds of 50  $\mu\text{M}$  *p*-3a in DMSO by pulsed green and blue light illumination. (c) Lifetime plot of *p*-3a based on following UV-Vis absorbance over time after irradiation with 530 nm light (37  $^{\circ}\text{C}$ , DMSO)

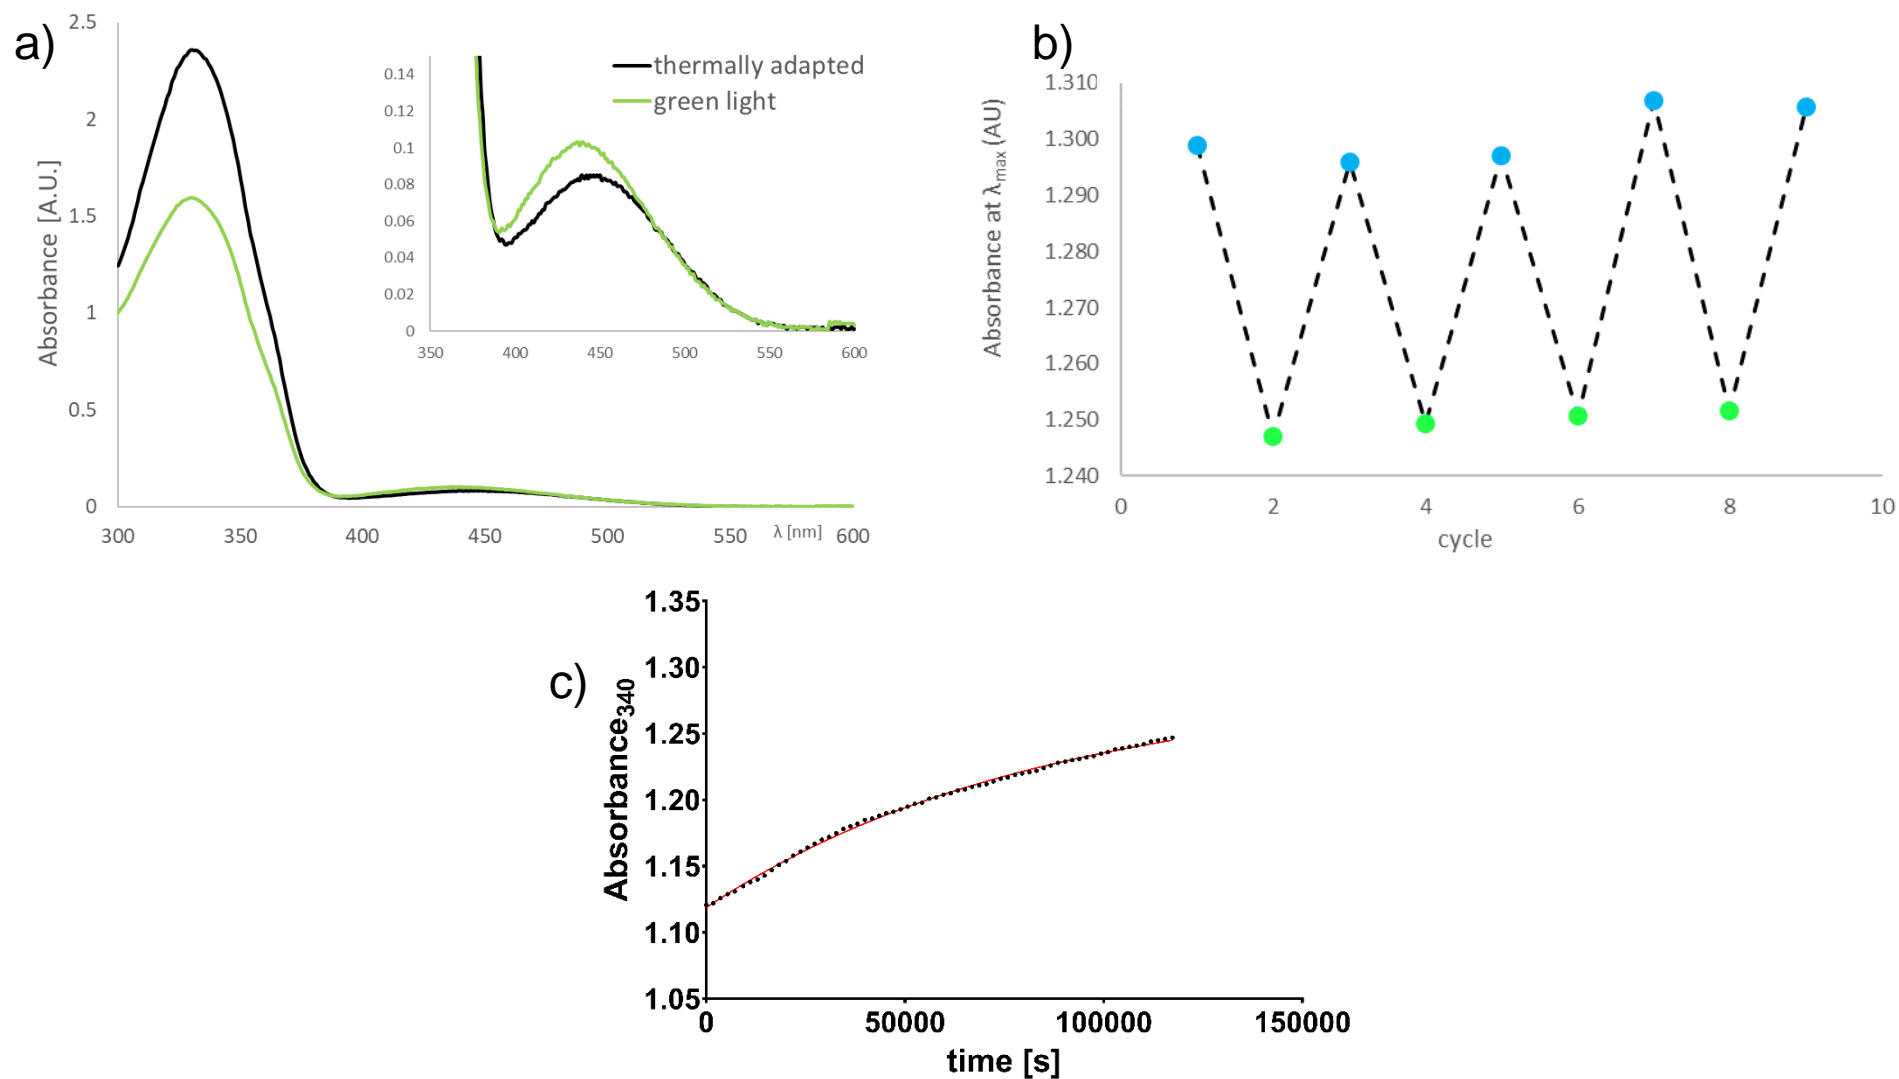

**Figure S28.** (a) UV-Vis absorption spectra of thermally adapted and green light irradiated 500  $\mu\text{M}$  *p*-3b in DMSO. (b) Multiple photoswitching rounds of 50  $\mu\text{M}$  *p*-3b in DMSO by pulsed green and blue light illumination. (c) Lifetime plot of *p*-3b based on following UV-Vis absorbance over time after irradiation with 530 nm light (37 °C, DMSO)

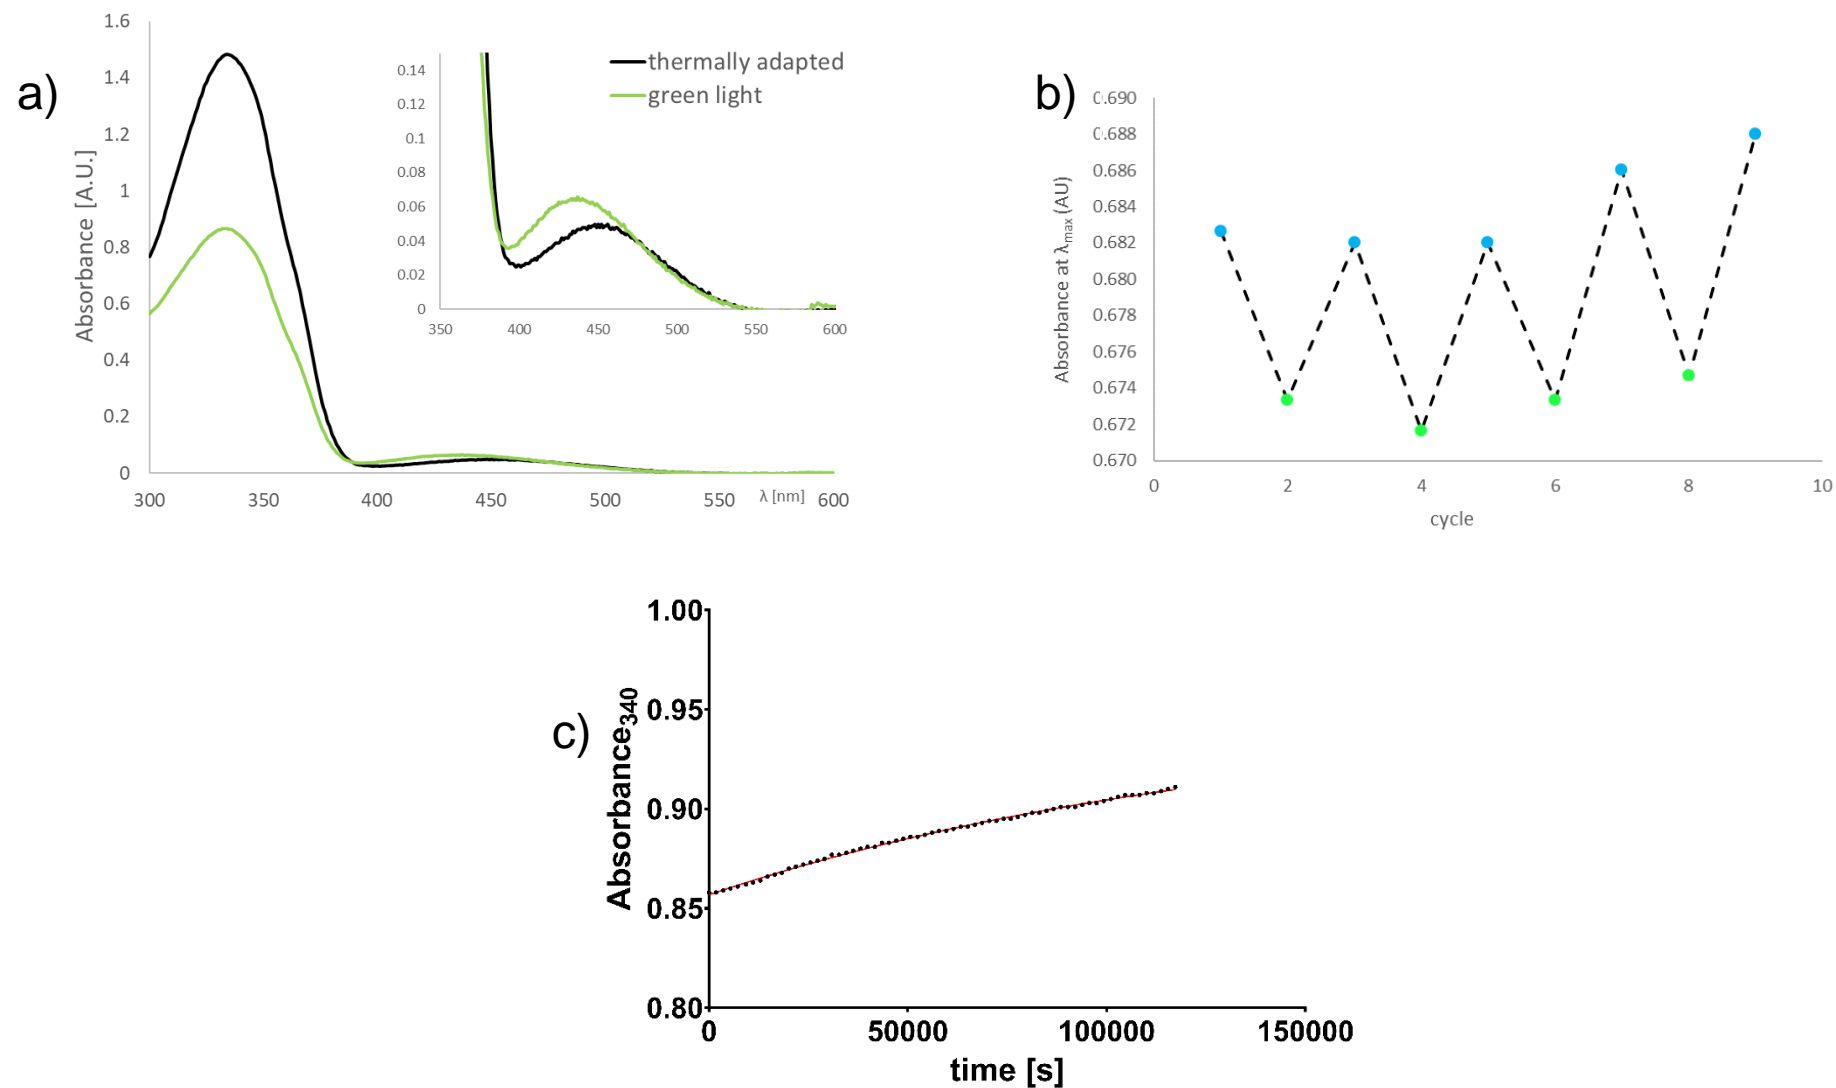

**Figure S29.** (a) UV-Vis absorption spectra of thermally adapted and green light irradiated 500  $\mu\text{M}$  *p*-3c in DMSO. (b) Multiple photoswitching rounds of 50  $\mu\text{M}$  *p*-3c in DMSO by pulsed green and blue light illumination. (c) Lifetime plot of *p*-3c based on following UV-Vis absorbance over time after irradiation with 530 nm light (37 °C, DMSO)

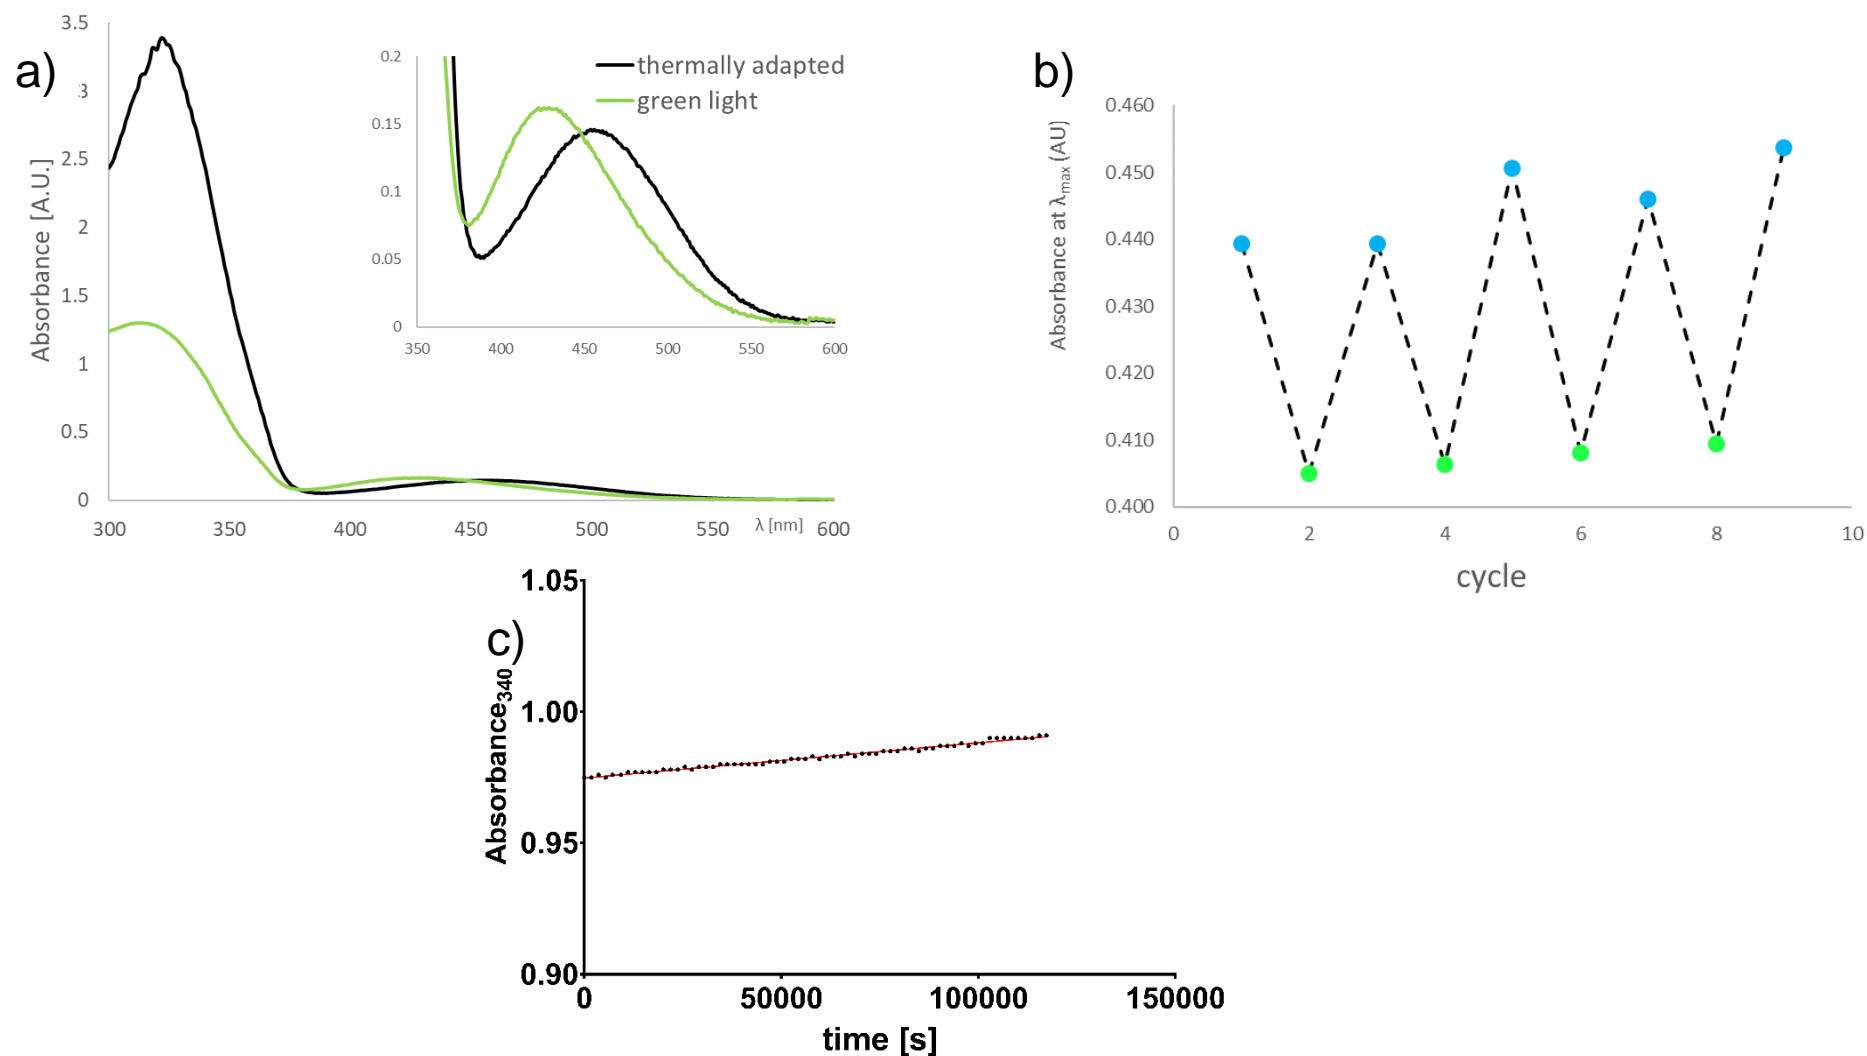

**Figure S30.** (a) UV-Vis absorption spectra of thermally adapted and green light irradiated 500  $\mu\text{M}$  *p*-3d in DMSO. (b) Multiple photoswitching rounds of 50  $\mu\text{M}$  *p*-3d in DMSO by pulsed green and blue light illumination. (c) Lifetime plot of *p*-3d based on following UV-Vis absorbance over time after irradiation with 530 nm light (37  $^{\circ}\text{C}$ , DMSO)

# BIOLOGICAL ASSAYS

## **Tubulin polymerisation assay:**

Tubulin from porcine brain was purified according to protocol published earlier [46]. The tubulin polymerisation reaction was conducted at 3.5 mg/mL tubulin, in tubulin polymerisation buffer (80 mM piperazine-N,N'-bis(2-ethanesulfonic acid) (PIPES) pH = 6.9; 0.5 mM EGTA; 2 mM MgCl<sub>2</sub>), in a 96-well plate (100 µL final volume) in a EnSpire® multimode plate reader (PerkinElmer, Turku, Finland) with temperature maintained at 37 °C. Tubulin was initially preincubated for 30 min at room temperature with (Z) enriched isomer (green light pre-illuminated) or with all (E) isomer (thermally adapted in dark) of *o*-AzoCol26DF (final concentration 10 µM) in buffer with 1% DMSO, without GTP. Sample with 1% DMSO alone was used as a control. Then GTP was added to concentration 1 mM, and the change in absorbance at 340 nm was monitored with 15 s intervals for 20 minutes.

## **Cell Culturing:**

Cells were cultured in a humidified incubator at 37 °C under 5% CO<sub>2</sub>. Human breast adenocarcinoma (MCF-7) cells were maintained in phenol red-free Dulbecco's Modified Eagle's Medium (Thermo Fisher Scientific, 11054020) supplemented with 2 mM L-glutamine and human colorectal carcinoma (HCT116) cells were maintained in the same medium but supplemented with 4.5 g/L glucose and 4 mM L-glutamine. All culture media were supplemented with 1% Penicillin-Streptomycin (Sigma-Aldrich, P4333) and 10% fetal bovine serum (Gibco, 10270-106). Cells were sub-cultured at approximately 70–90% confluency to maintain the culture in the logarithmic growth phase.

## **MTT Cytotoxicity Assay with green and blue light irradiation:**

Cells were seeded at a 96-well plate at the density of  $7 \times 10^3$  cells per well and allowed to grow for 24 h. Afterward, the medium was aspirated and fresh medium was added (200 µL) with serial dilutions of tested compounds or DMSO at corresponding concentrations as a control. Following 48 h of incubation under 500 ms pulsed green or blue light irradiation every 15 seconds, the medium was replaced with medium (100 µL) containing MTT (3-(4,5-dimethylthiazol-2-yl)-2,5-diphenyl-2H-tetrazolium bromide, 0.5 mg/mL) and incubated at 37 °C for 4 hours. The formed formazan was dissolved in DMSO (100 µL) and incubated at 37 °C for 10 min. The absorbance was measured at 540 nm. After blank subtraction, the half maximal effective concentration (IC<sub>50</sub>) was calculated by GraphPad Prism software (GraphPad Software Inc, San Diego, CA, USA). Each independent experiment was performed in triplicate.

## **Immunofluorescence:**

Cells were seeded on coverslips on a 24-well plate at a density of  $5 \times 10^4$  cells per well and allowed to grow overnight. Next, the medium was replaced with a medium containing the *o*-AzoCol26DF or the colchicine (without illumination) or DMSO as control and incubated for 24 h under 500 ms pulsed green or blue light irradiation every 15 s. Then, cells were fixed and permeabilised with 100% methanol at –20 °C for 15 min and subsequently washed three times with PBS at room temperature. After 1 h blocking with 3% BSA/PBS at 4 °C, slides were incubated with anti- $\alpha$ -tubulin 12G10 antibody (Developmental Studies Hybridoma Bank, University of Iowa, Iowa City, IA, USA) (diluted 1:300 in 3% BSA/PBS) and anti-acetylated  $\alpha$ -tubulin antibody (Cell Signalling, Danvers, MA, USA) (diluted 1:1000 in 3% BSA/PBS) overnight at 4 °C. After  $3 \times 10$  min washing with PBS, slides were incubated with AlexaFluor555-conjugated anti-rabbit and AlexaFluor488-conjugated anti-mouse secondary antibodies (diluted 1:400 in 3% BSA/PBS) (Thermo Fisher Scientific, Waltham, MA, USA, A31570) and with DAPI (50 ng/mL) for 1 h at room temperature. After washing ( $3 \times 10$  min with PBS), slides were mounted in Fluoromount-G



(Southern Biotech., Birmingham, AL, USA). Images were recorded using Leica TCS SP8 (Leica Microsystems, Wetzlar, Germany) confocal microscope and analysed using ImageJ 1.53t software

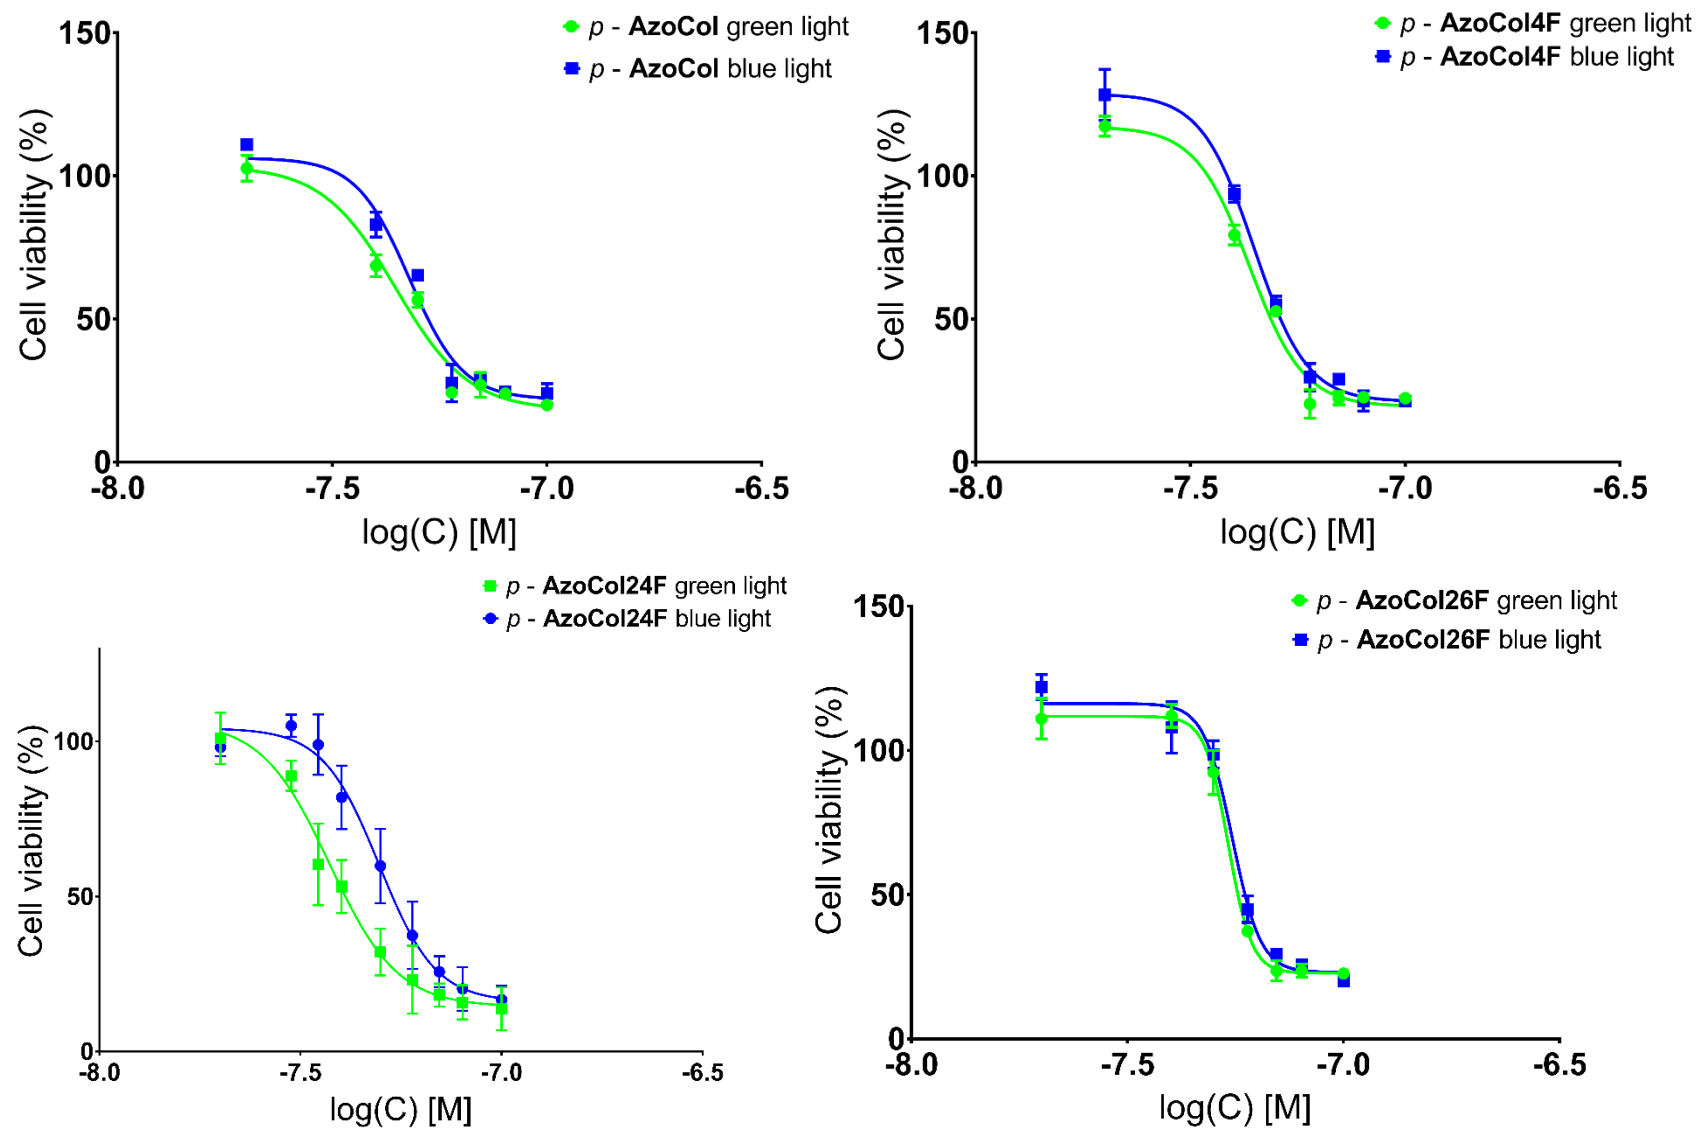

**Figure S31.** Representative viability of MCF-7 cells from MTT assays for *p*-AzoCols

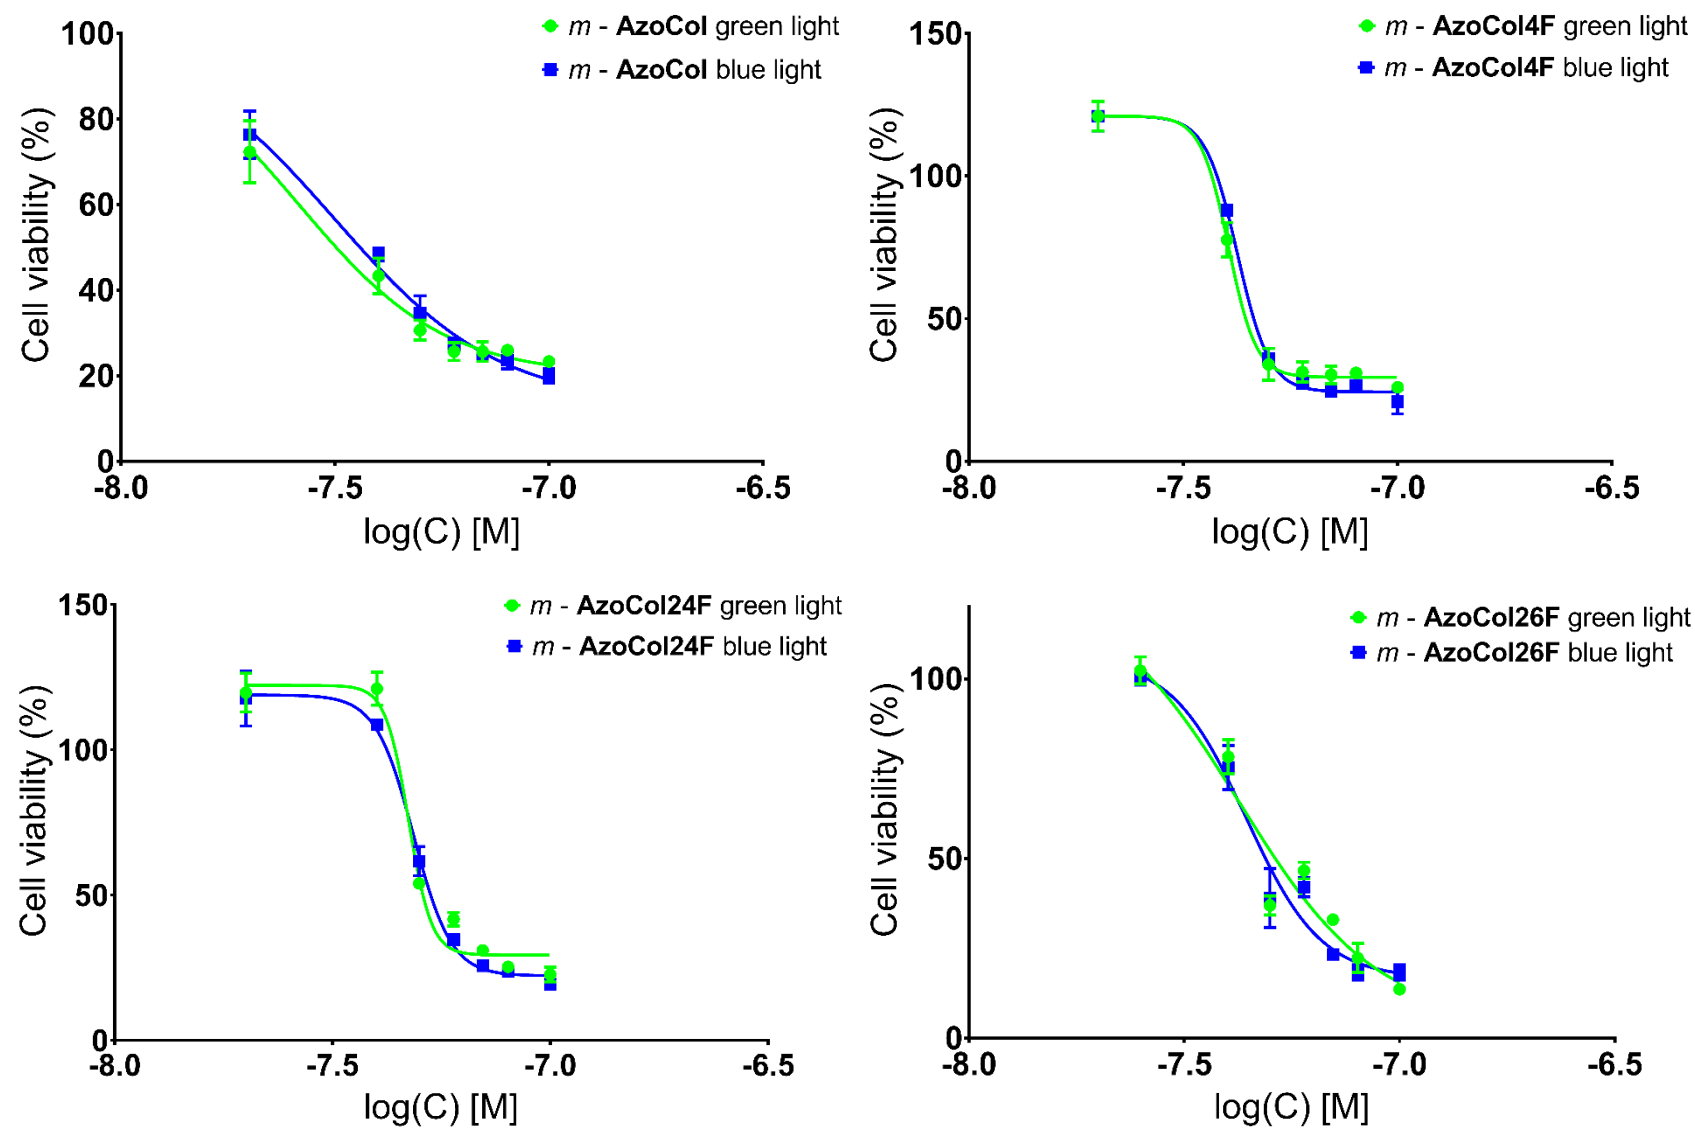

**Figure S32.** Viability of MCF-7 cells from MTT assays for *m*-AzoCols

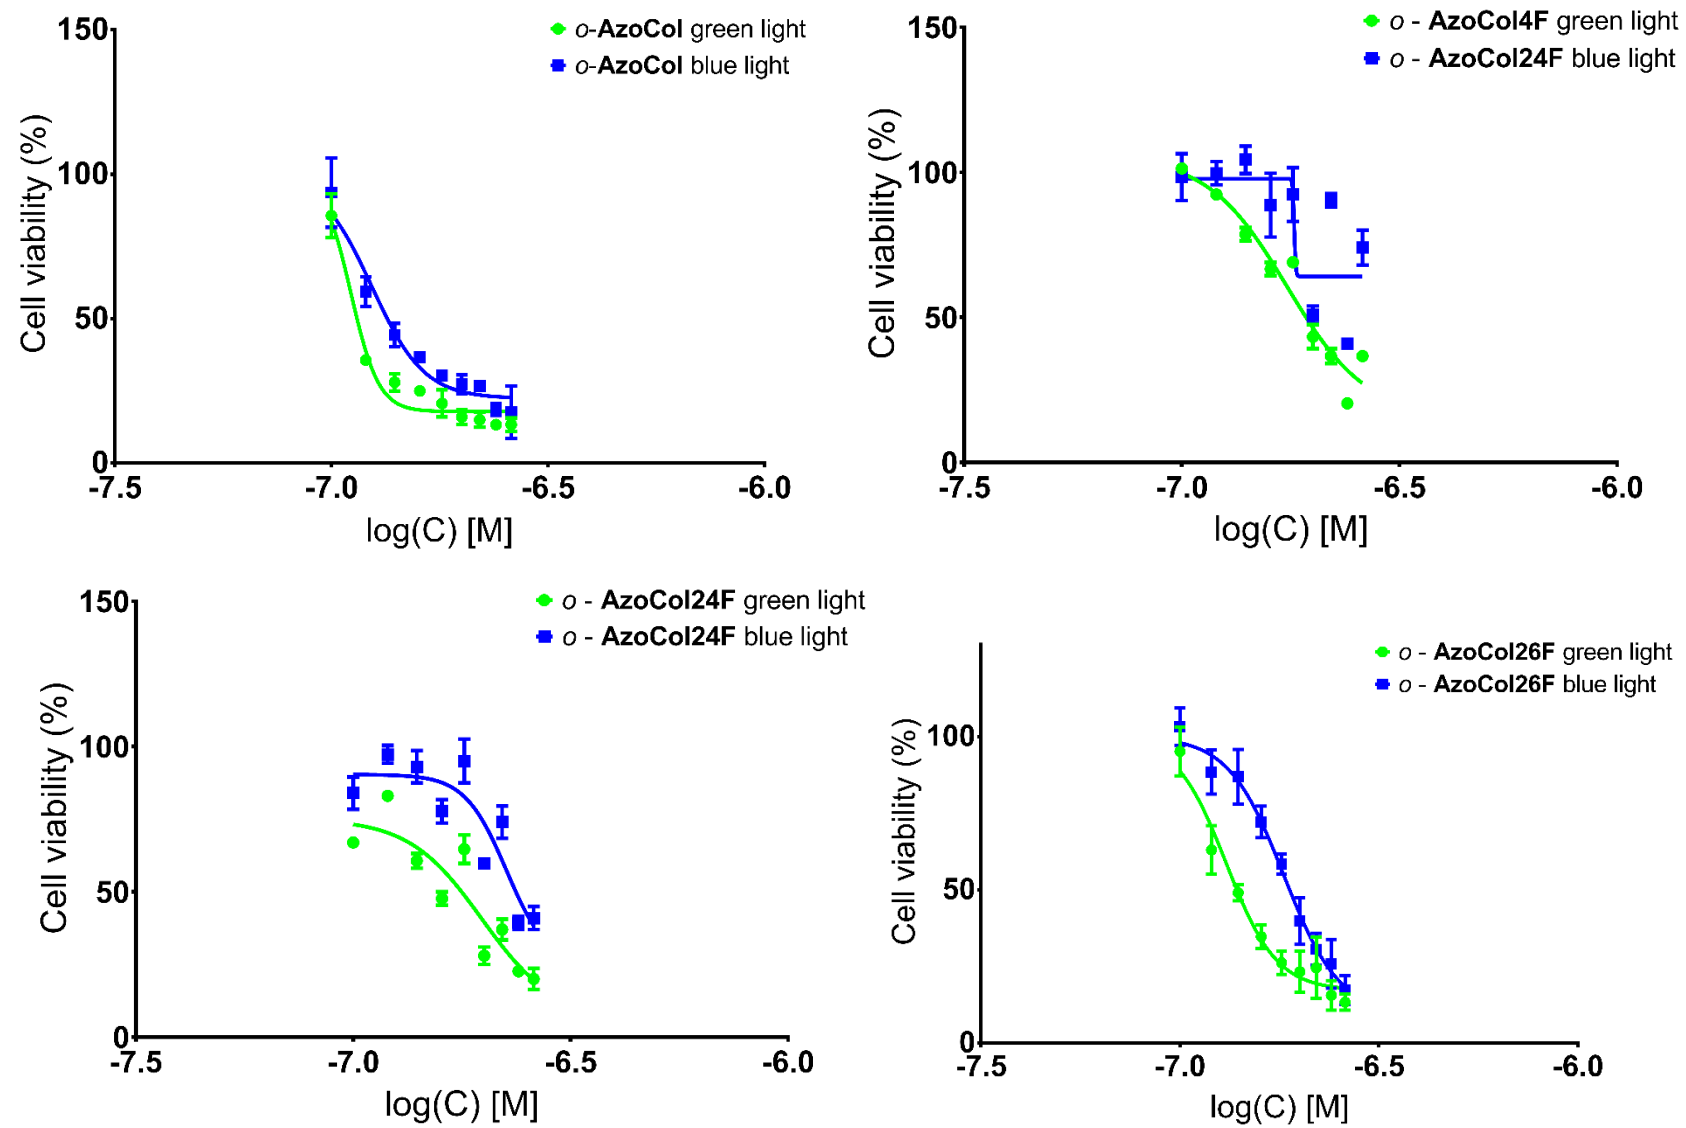

**Figure S33.** Viability of MCF-7 cells from MTT assays for *o*-AzoCols

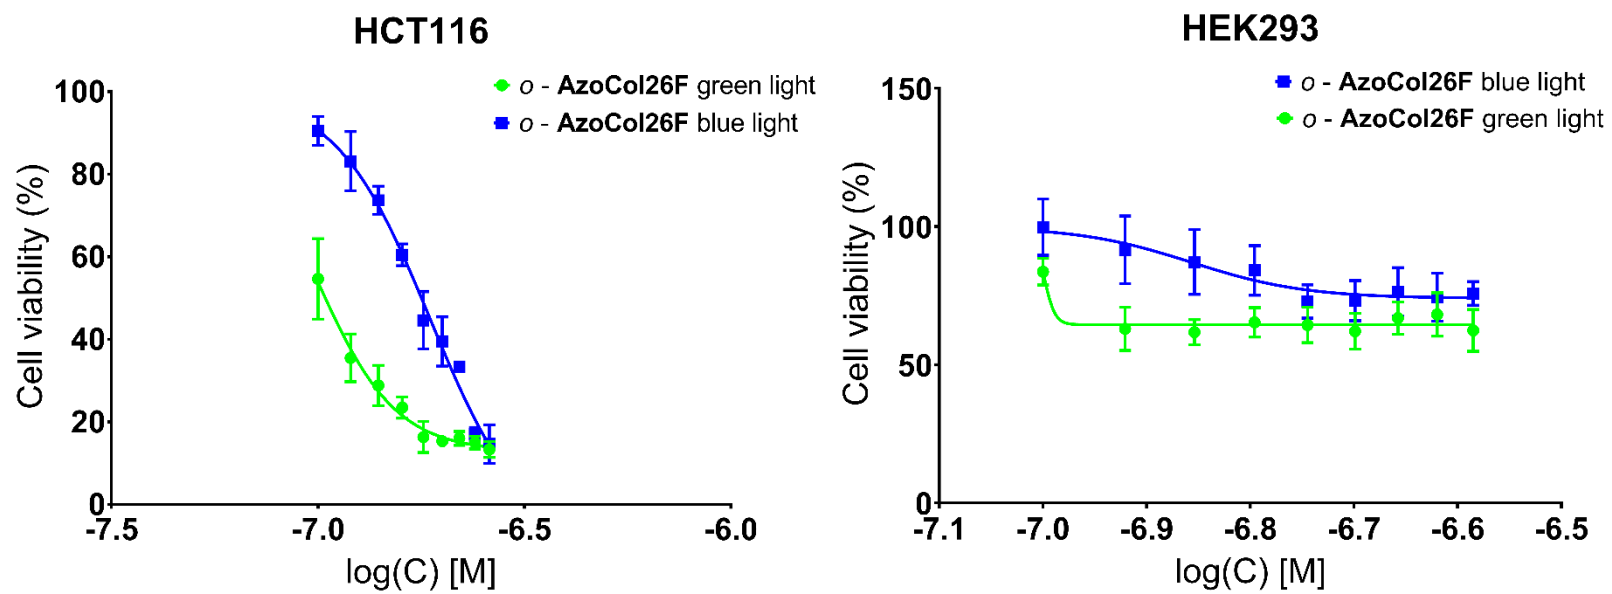

**Figure S34.** Representative viability of HCT116 and HEK293 cells from MTT assays for *o*-AzoCol26DF.

# COPIES OF NMR SPECTRA

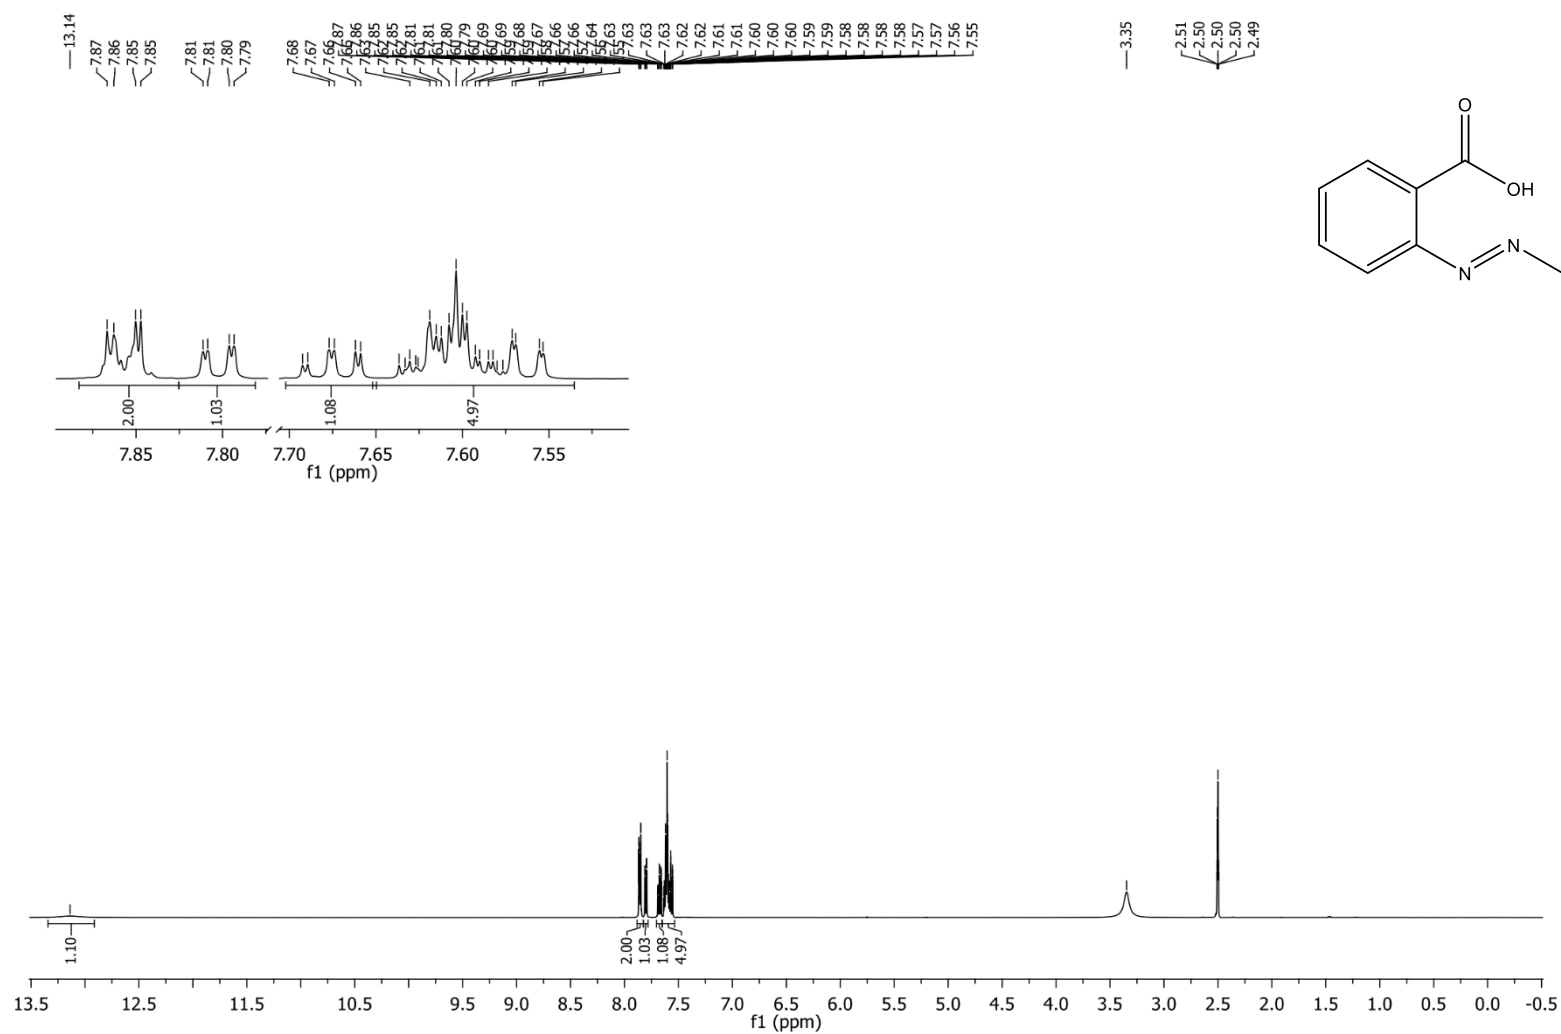

**Figure S35.**  $^1\text{H}$  NMR spectra of *o*-**3a** ((*E*)-2-(phenyldiazenyl)benzoic acid).

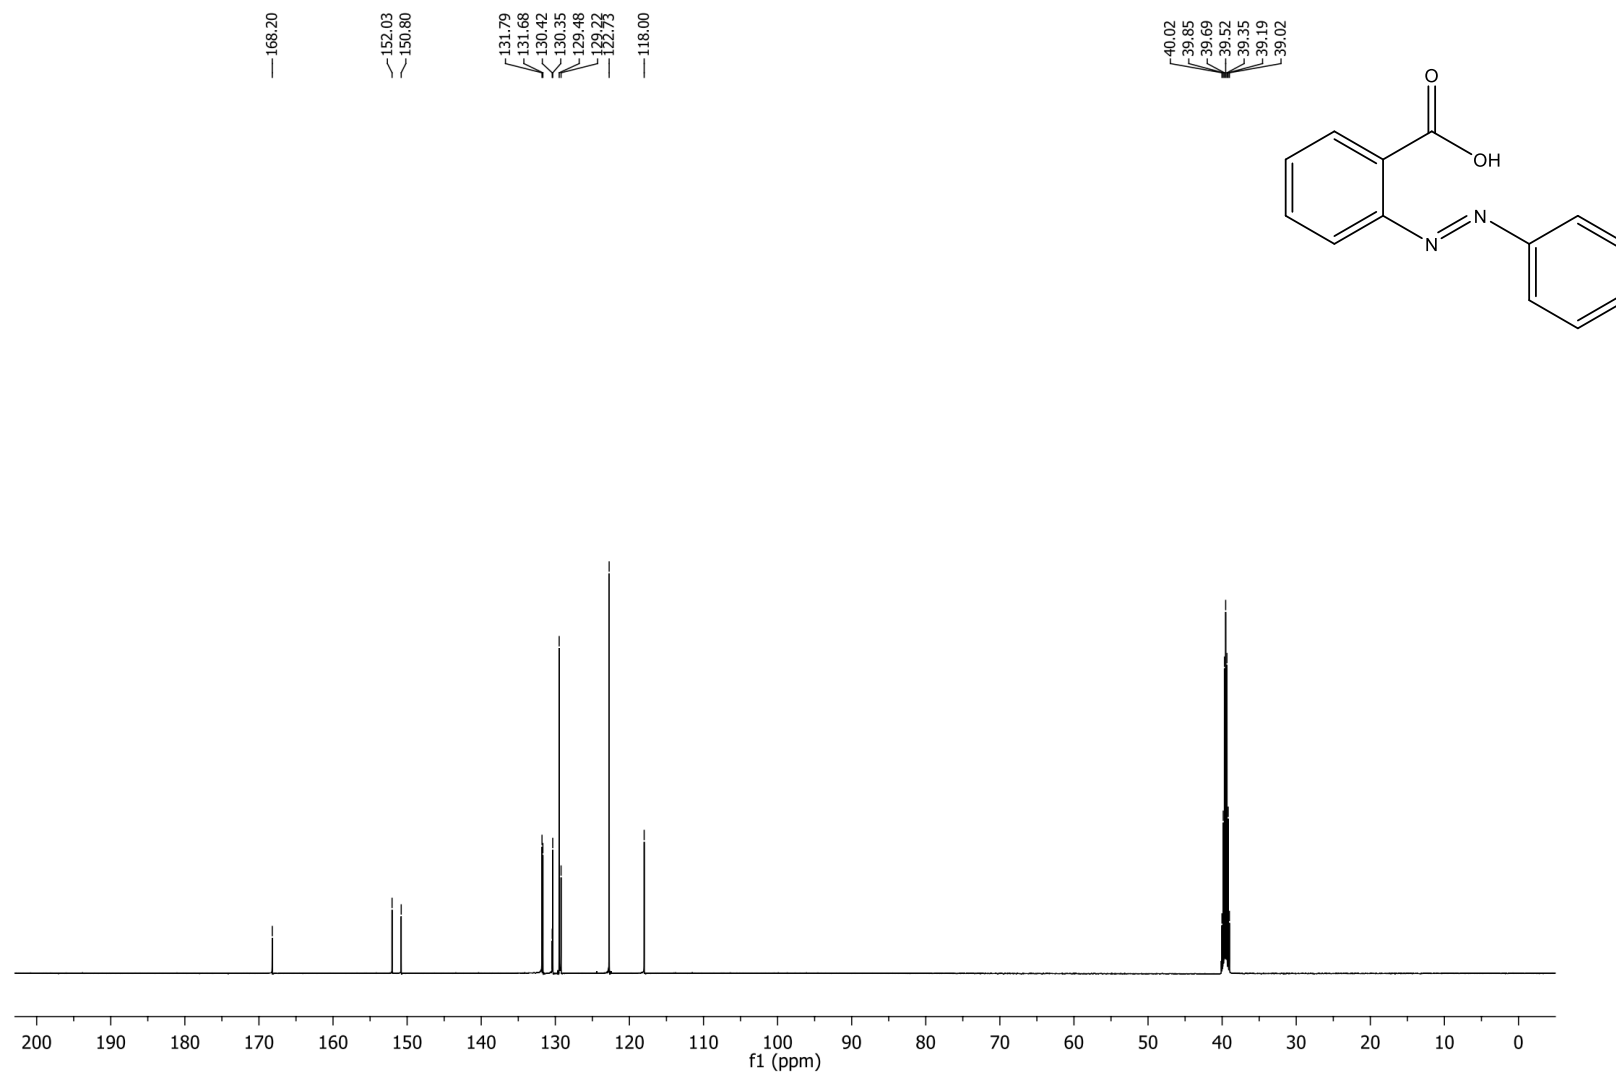

**Figure S36.** <sup>13</sup>C NMR spectra of *o*-**3a** ((*E*)-2-(phenyldiazenyl)benzoic acid).

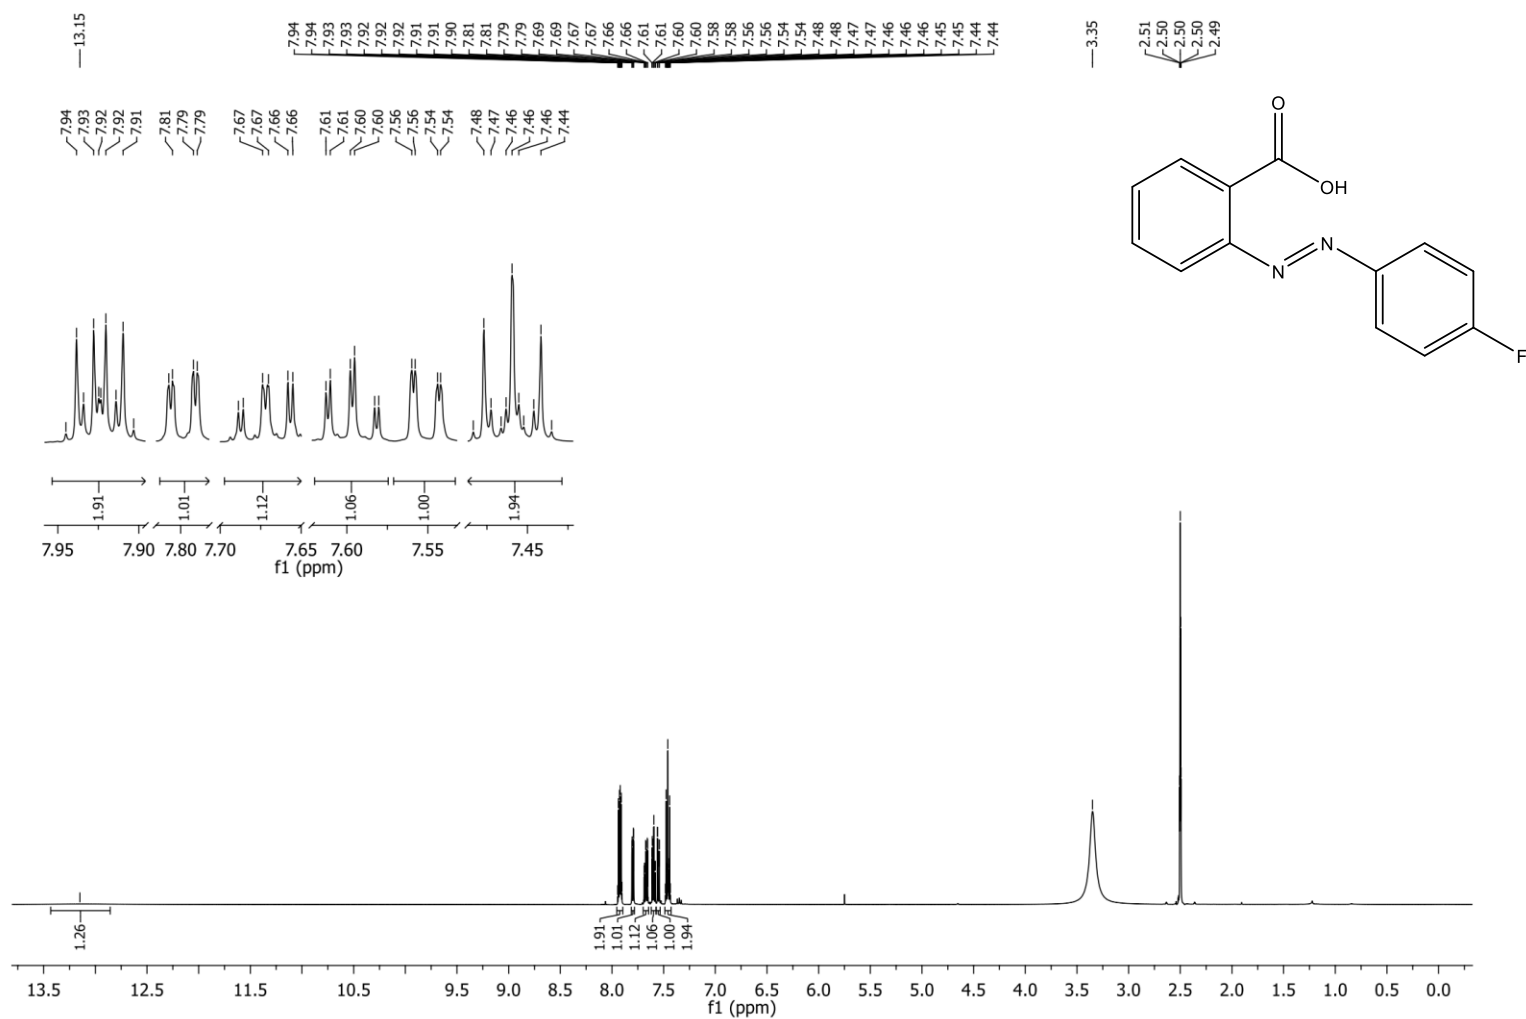

**Figure S37.** <sup>1</sup>H NMR spectra of *o*-**3b** (*(E)*-2-((4-fluorophenyl)diazenyl)benzoic).



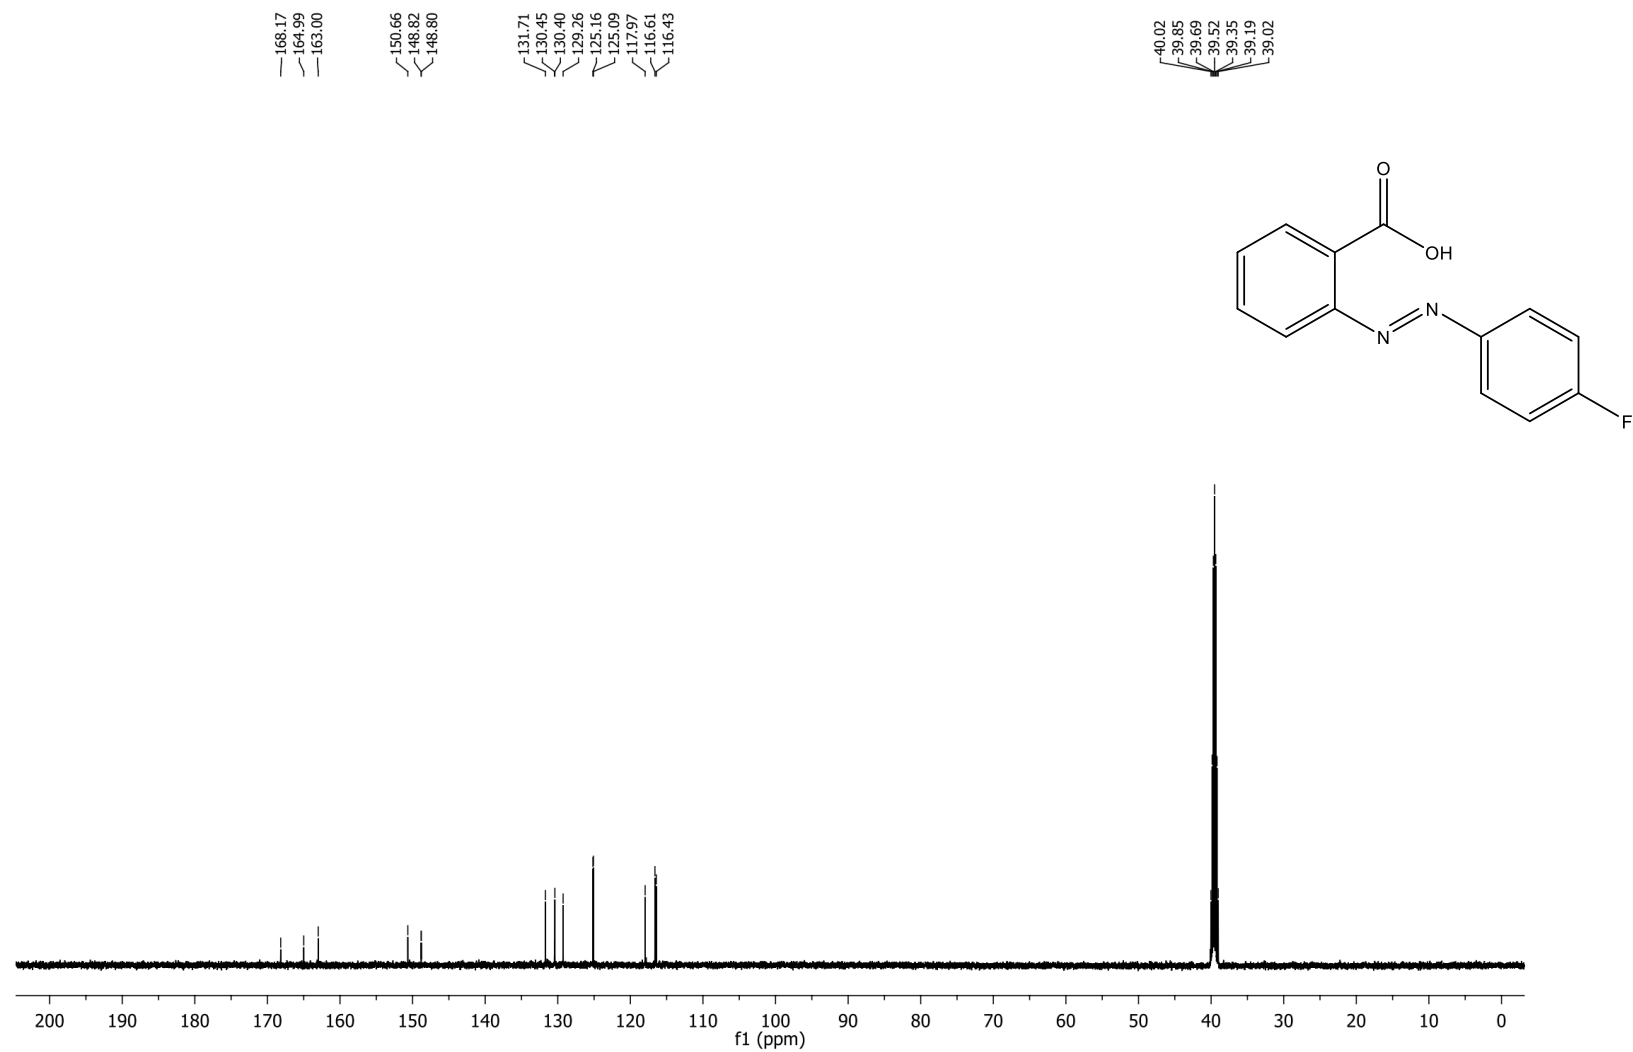

**Figure S38.**  $^{13}\text{C}$  NMR spectra of *o*-**3b** ((*E*)-2-((4-fluorophenyl)diazenyl)benzoic).

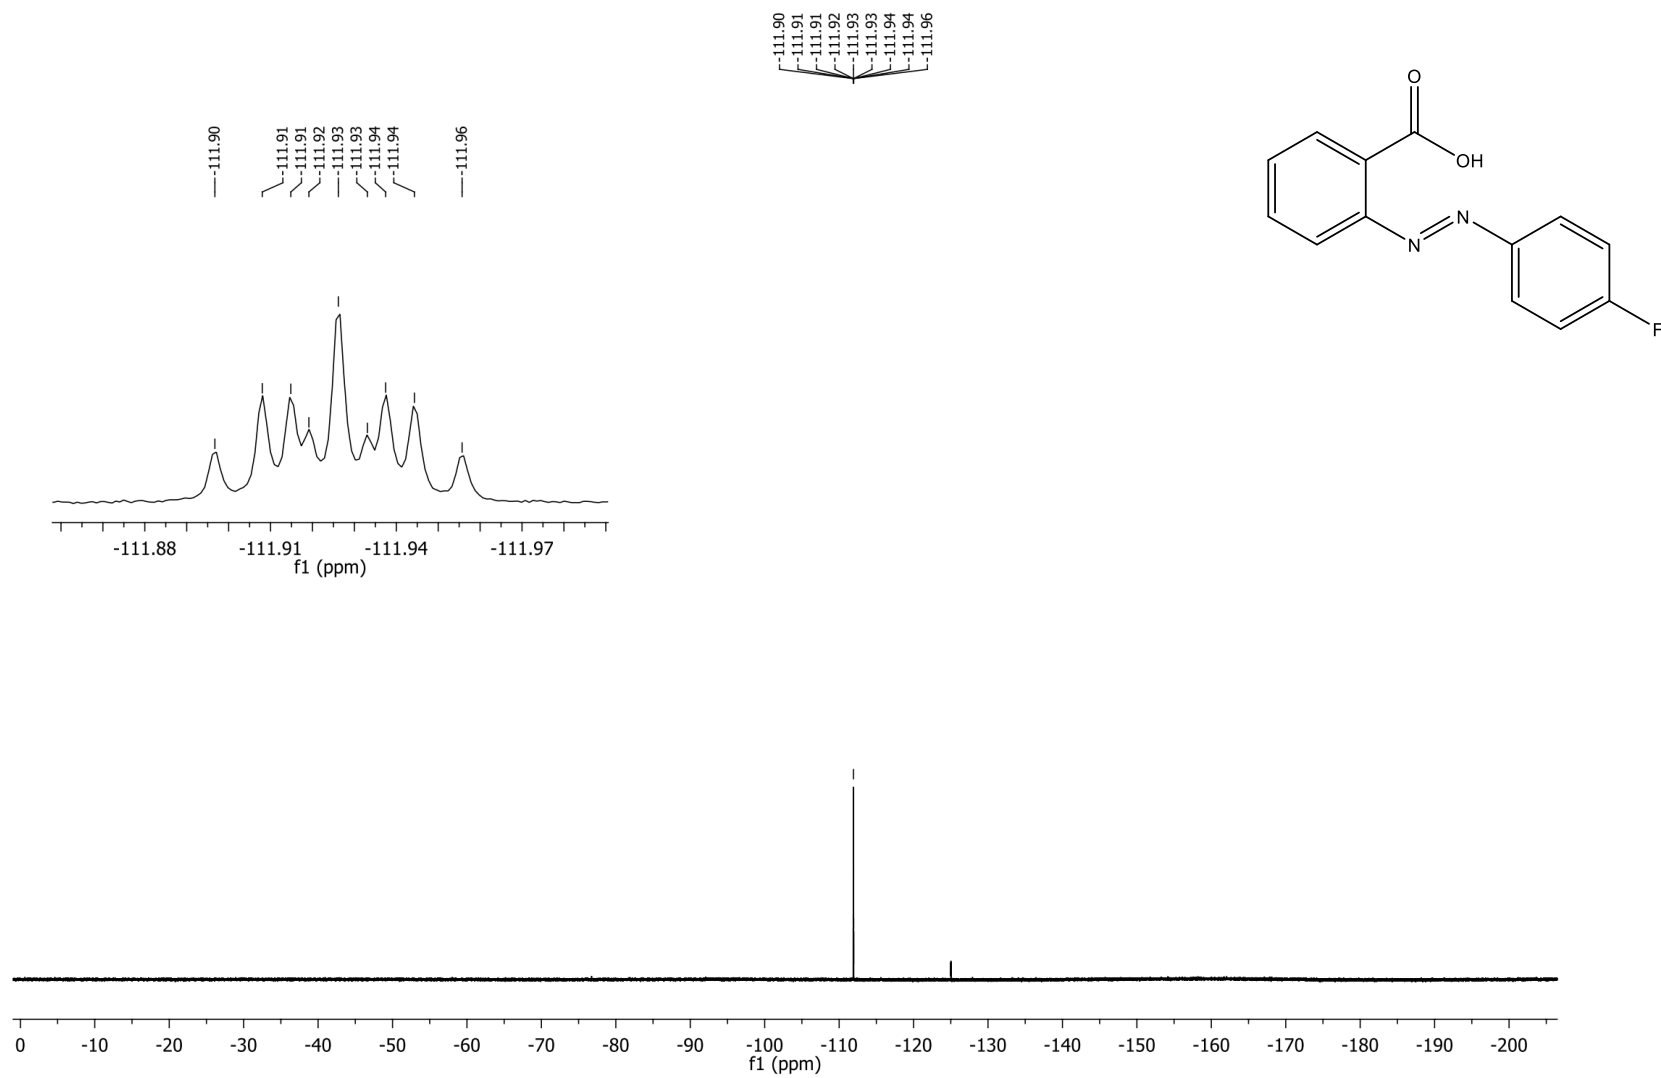

**Figure S39.**  $^{19}\text{F}$  NMR spectra of *o*-**3b** ((*E*)-2-((4-fluorophenyl)diazenyl)benzoic).

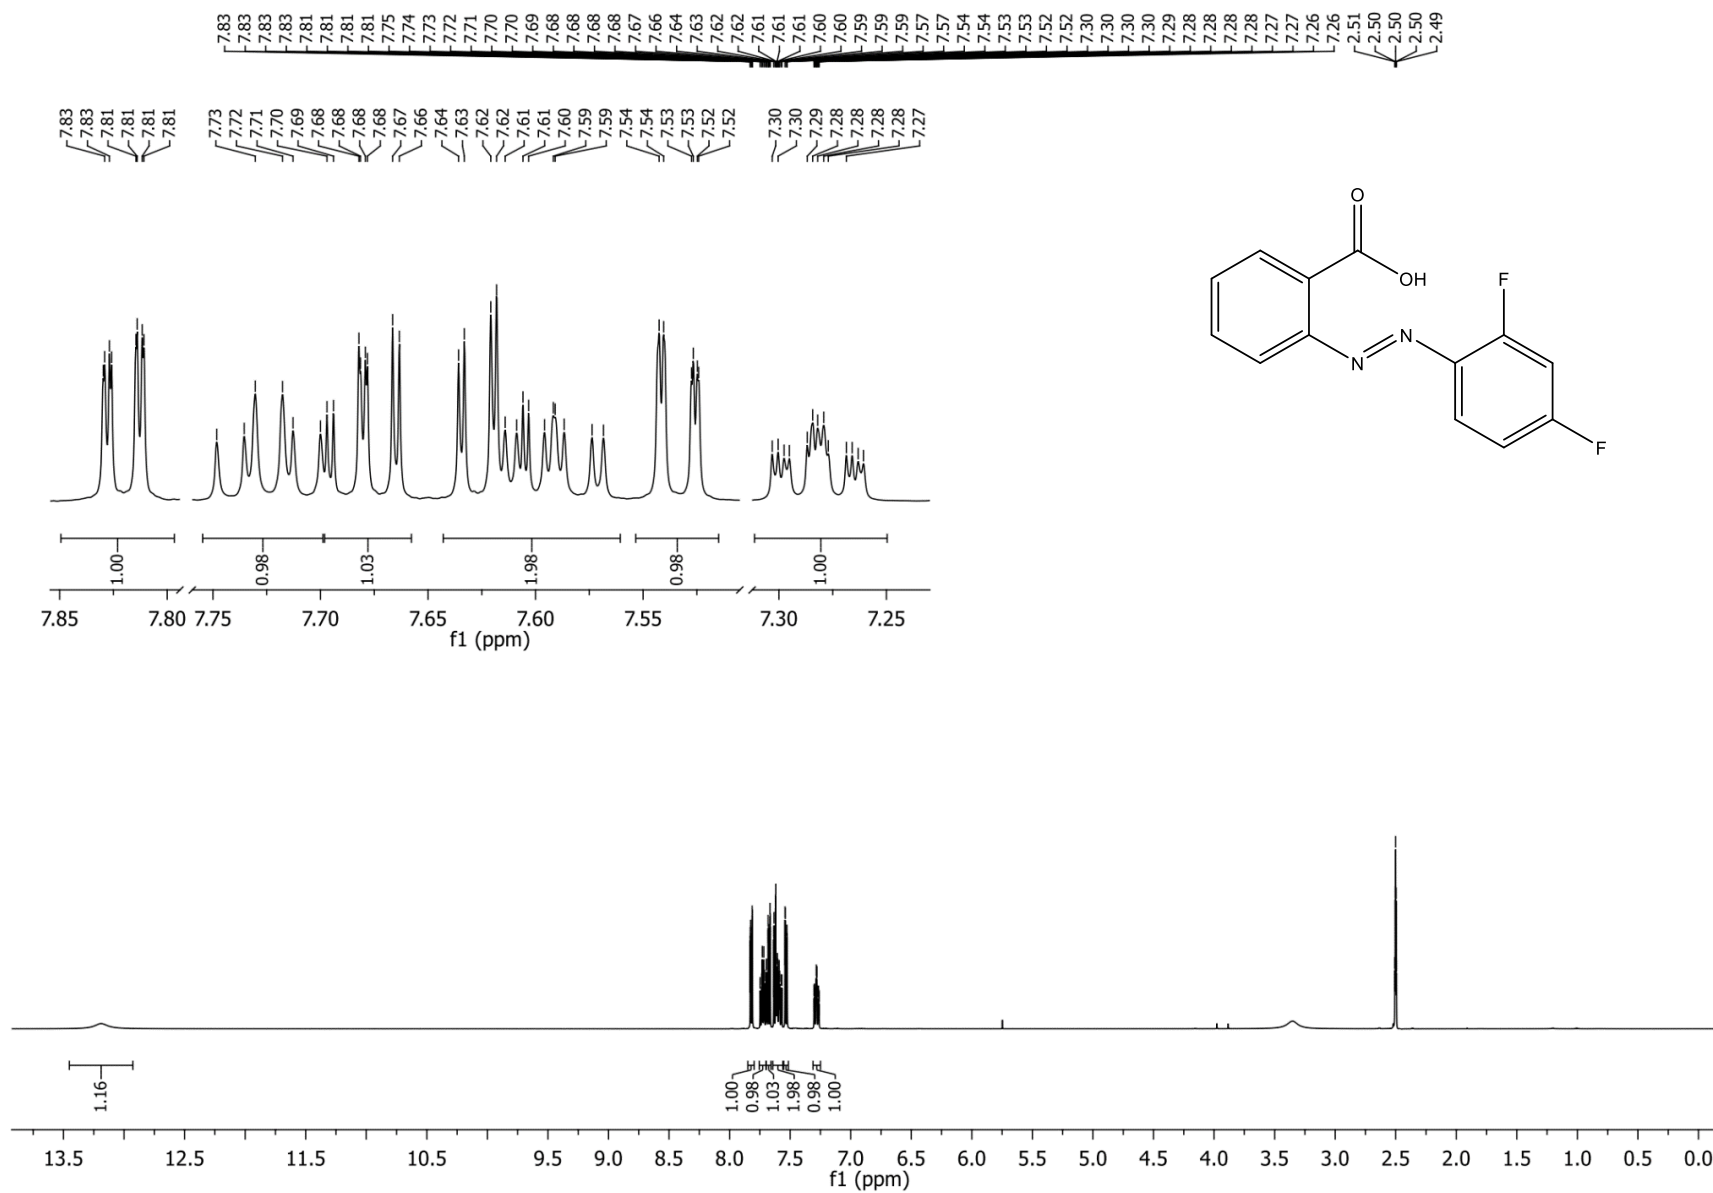

**Figure S40.**  $^1\text{H}$  NMR spectra of *o*-3c ((*E*)-2-((2,4-difluorophenyl)diazenyl)benzoic acid).

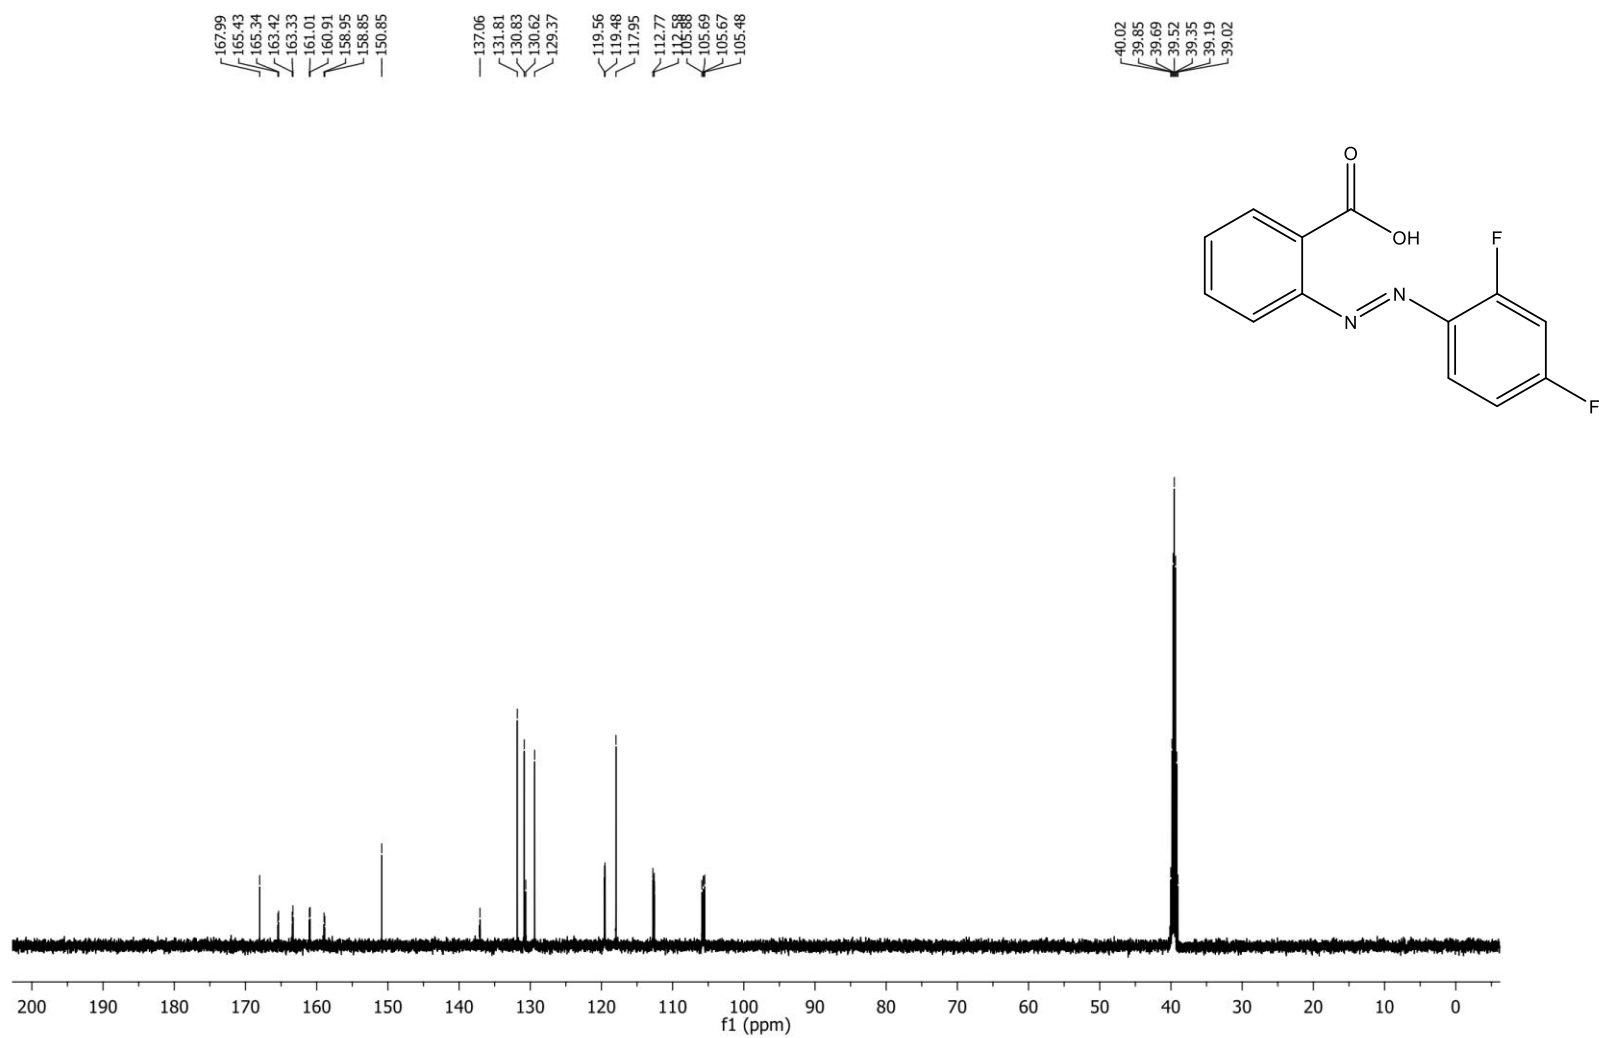

**Figure S41.** <sup>13</sup>C NMR spectra of *o*-**3c** ((*E*)-2-((2,4-difluorophenyl)diazenyl)benzoic acid).

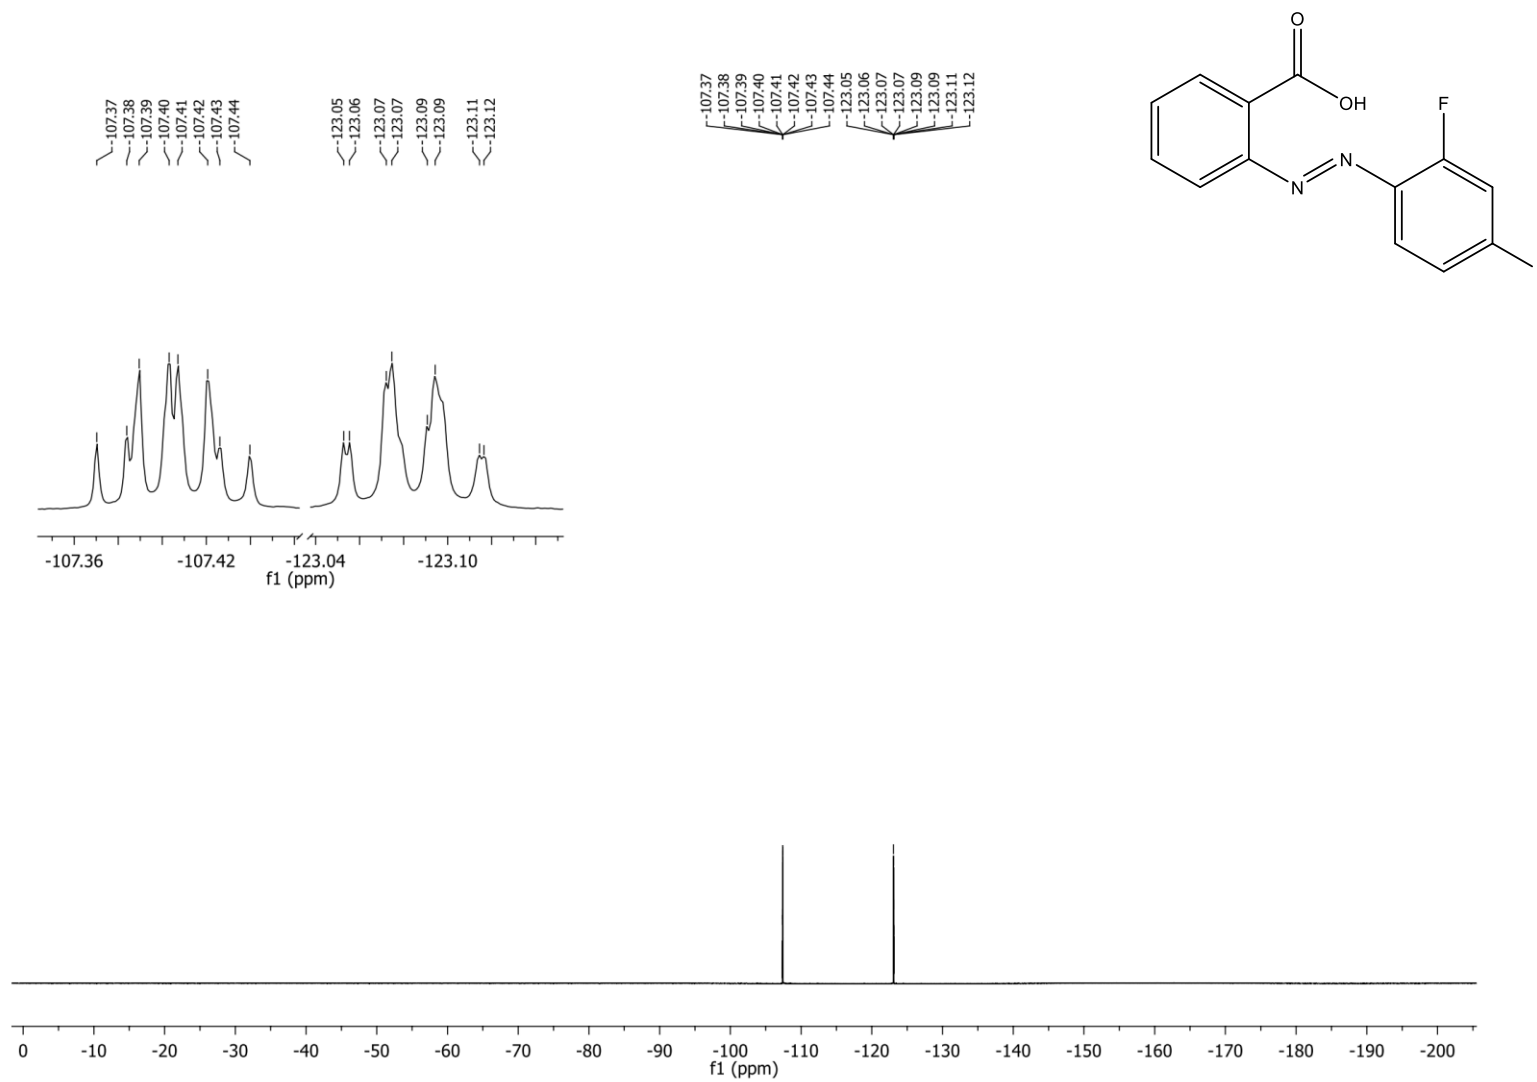

**Figure S42.** <sup>19</sup>F NMR spectra of *o*-3c ((*E*)-2-((2,4-difluorophenyl)diazenyl)benzoic acid).

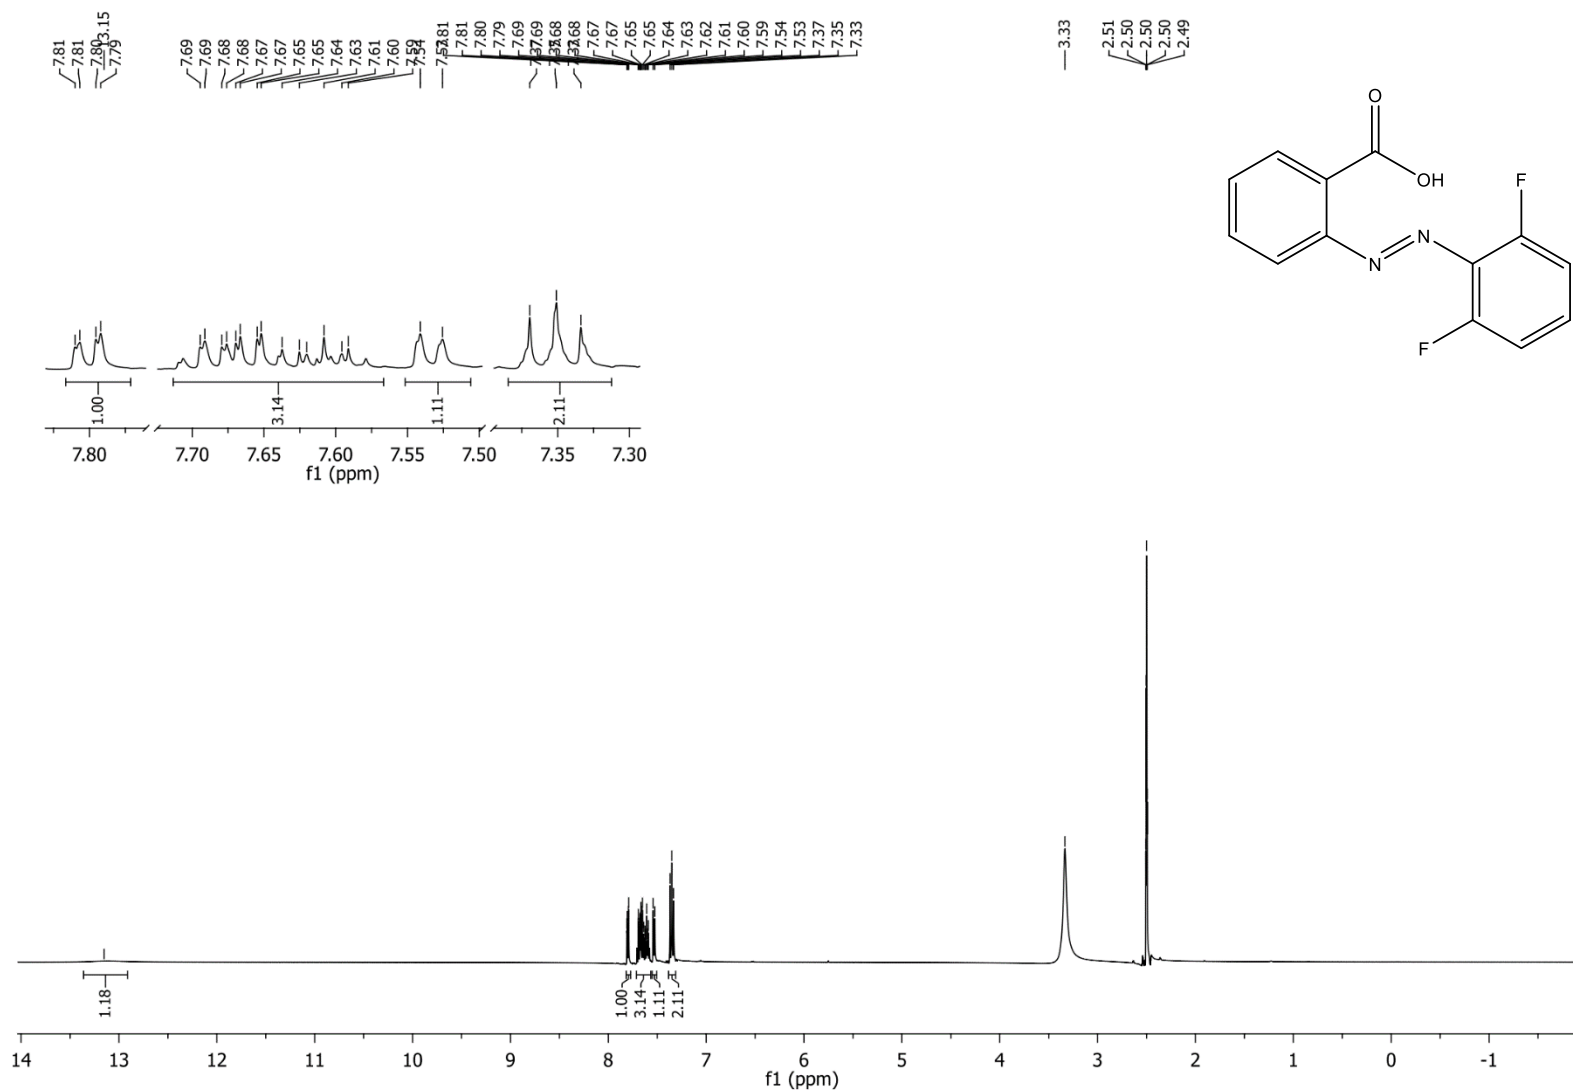

**Figure S43.**  $^1\text{H}$  NMR spectra of *o*-**3d** ((*E*)-2-((2,6-difluorophenyl)diazenyl)benzoic acid).

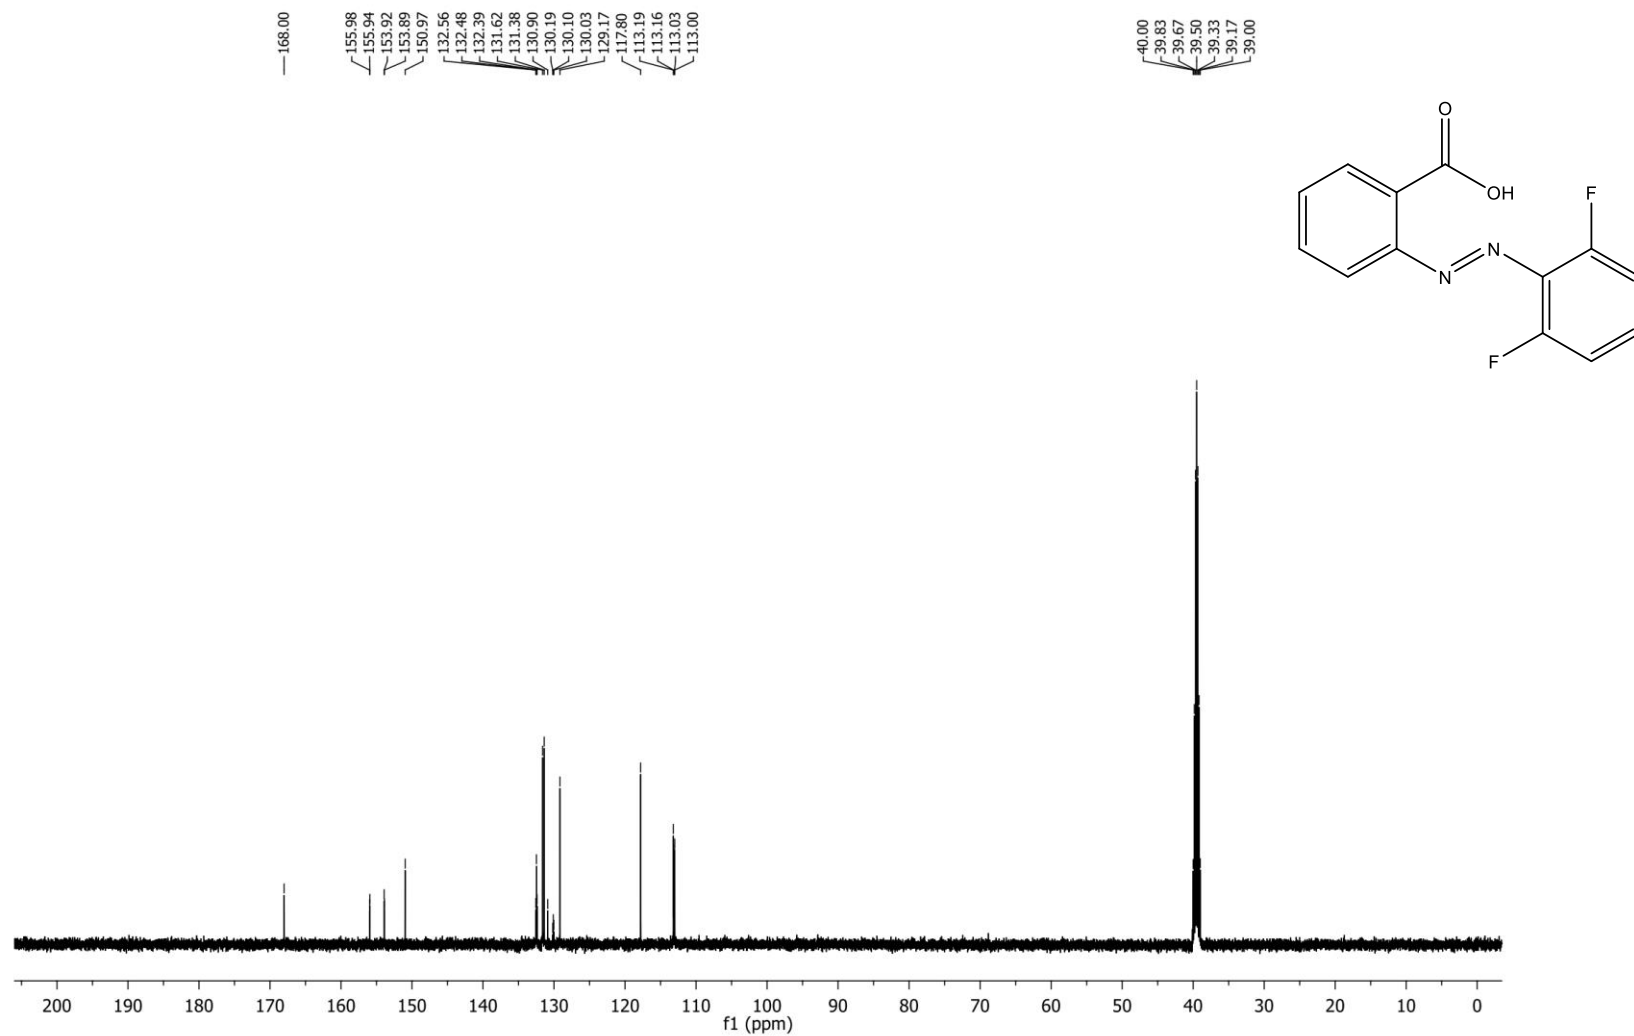

**Figure S44.** <sup>13</sup>C NMR spectra of *o*-**3d** ((*E*)-2-((2,6-difluorophenyl)diazenyl)benzoic acid).

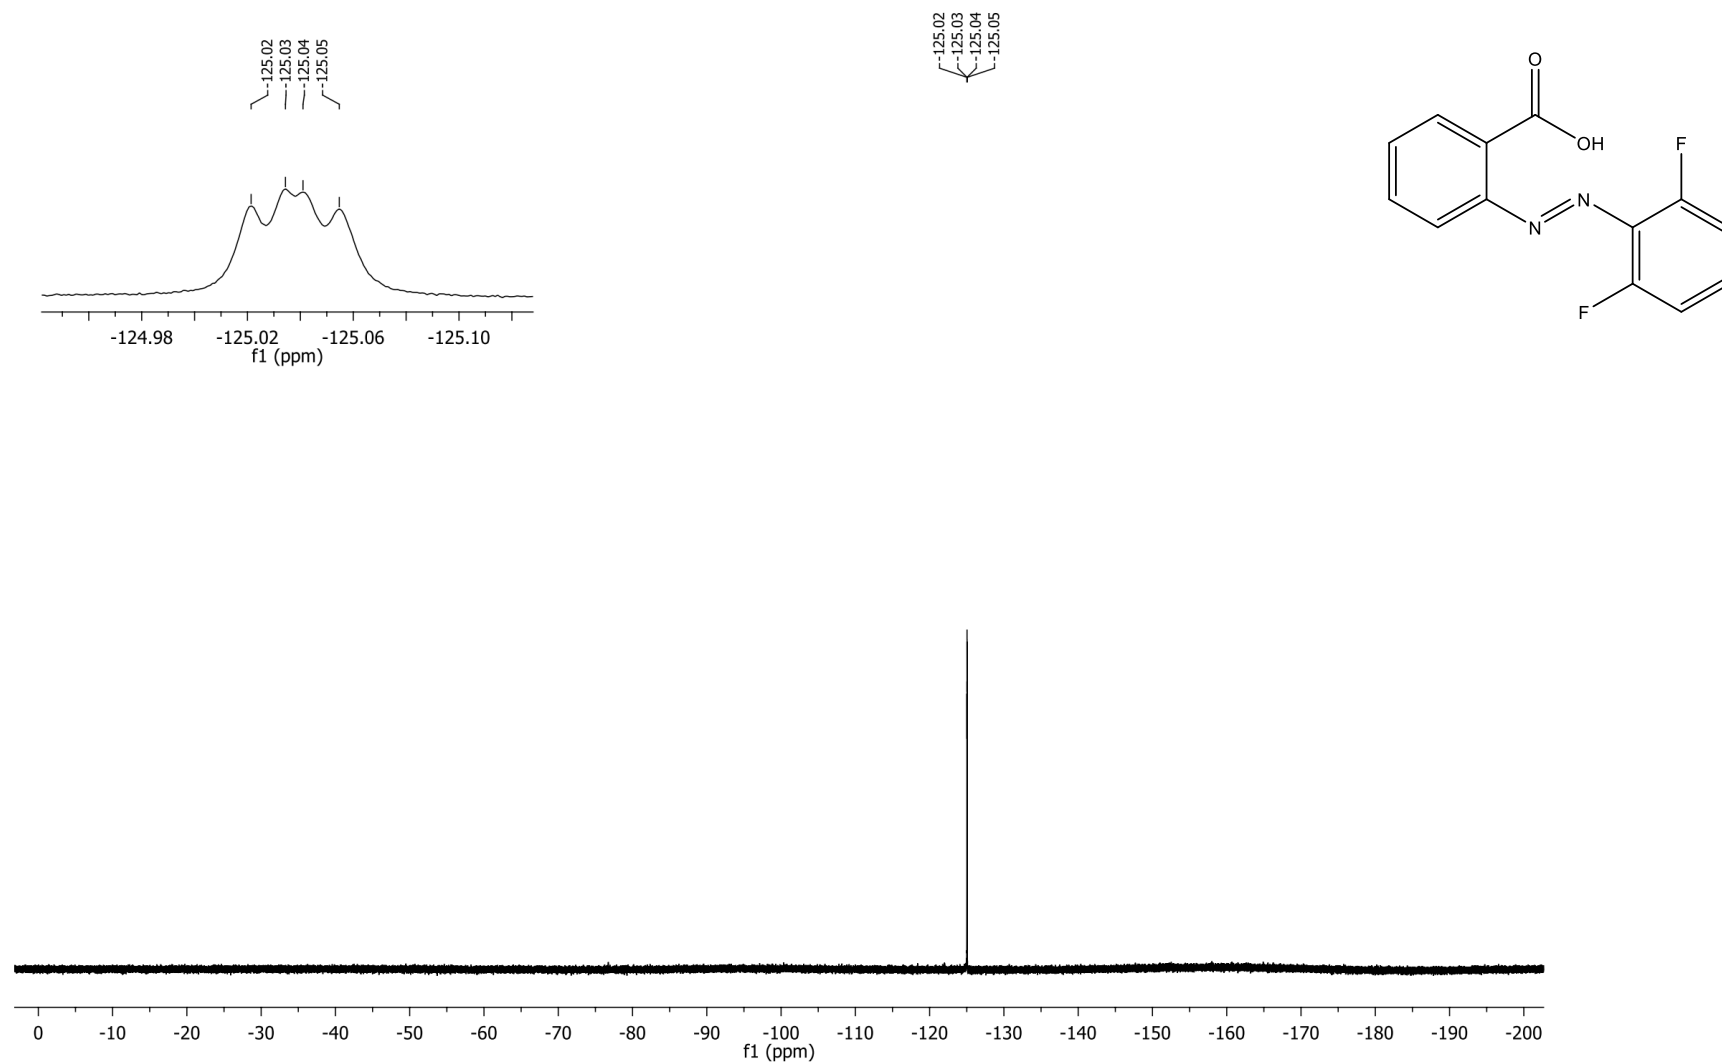

**Figure S45.**  $^{19}\text{F}$  NMR spectra of *o*-**3d** (*(E)*-2-((2,6-difluorophenyl)diazenyl)benzoic acid).



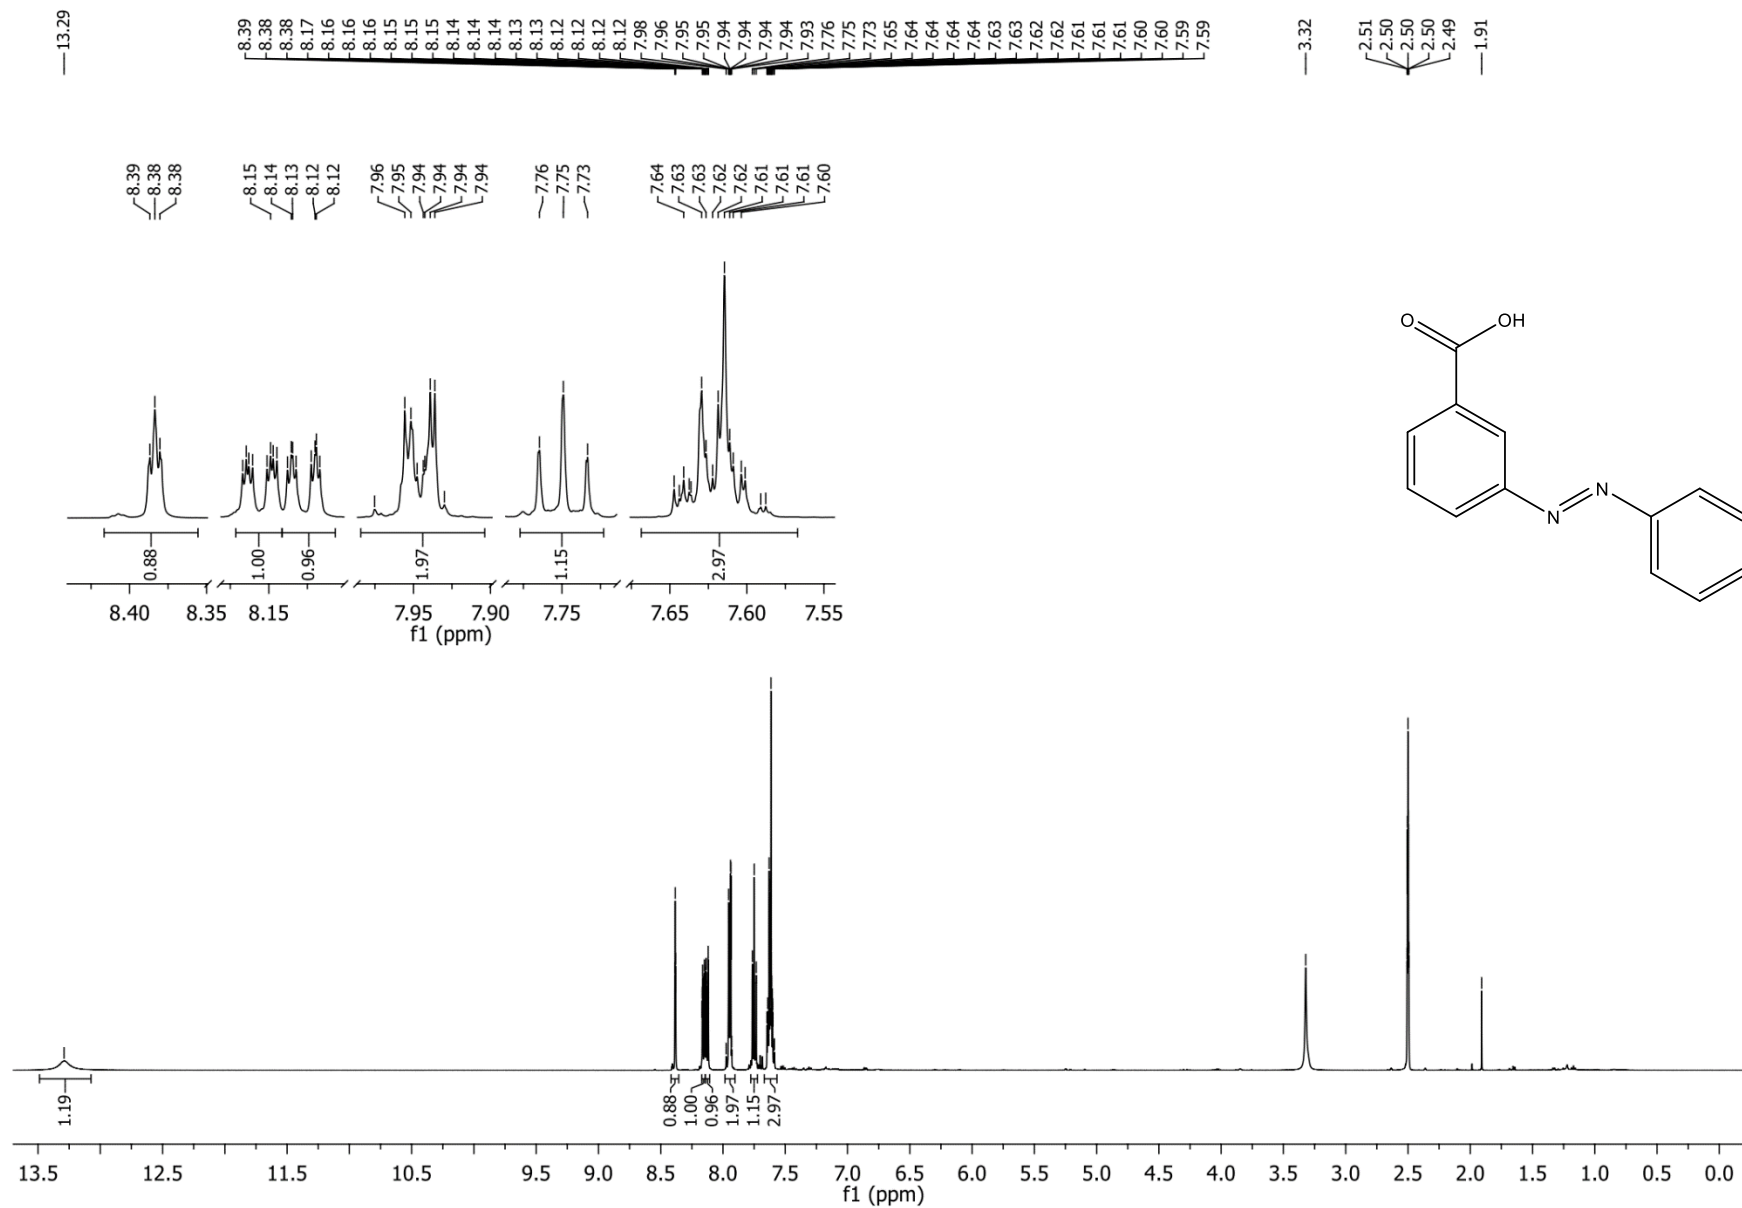

**Figure S46.**  $^1\text{H}$  NMR spectra of *m*-**3a** (*(E)*-3-(phenyldiazenyl)benzoic acid).

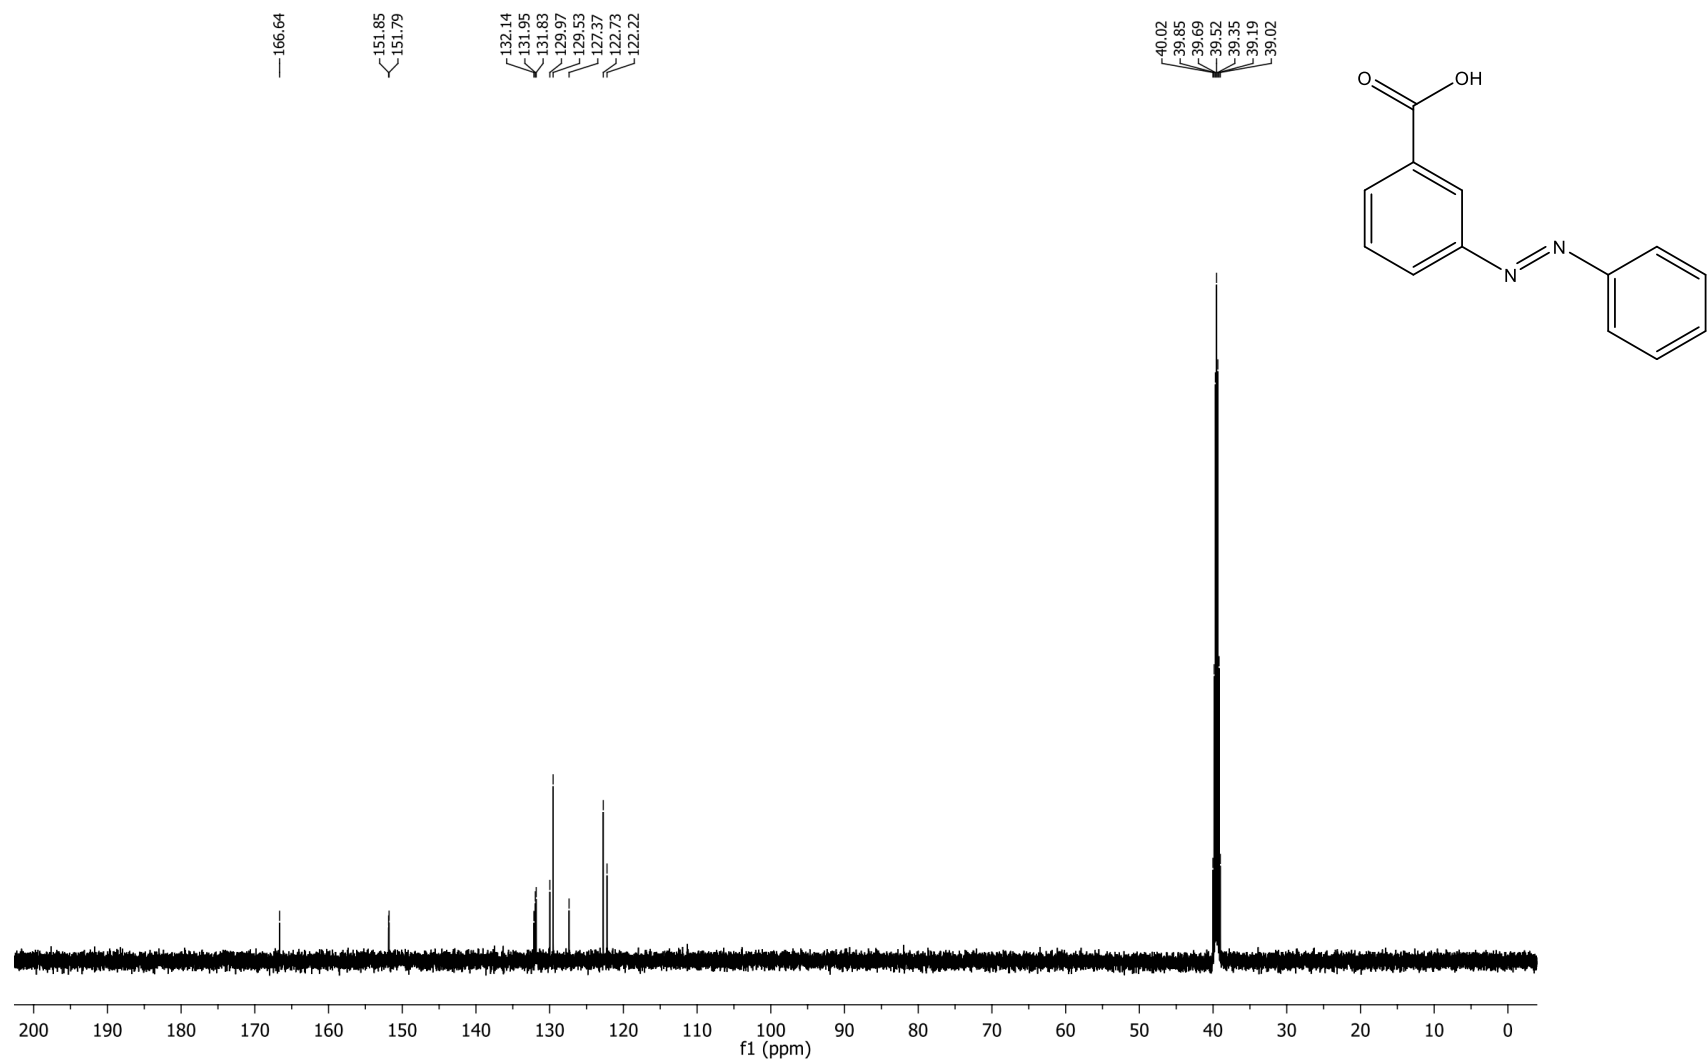

**Figure S47.** <sup>13</sup>C NMR spectra of *m*-**3a** ((*E*)-3-(phenyldiazenyl)benzoic acid).

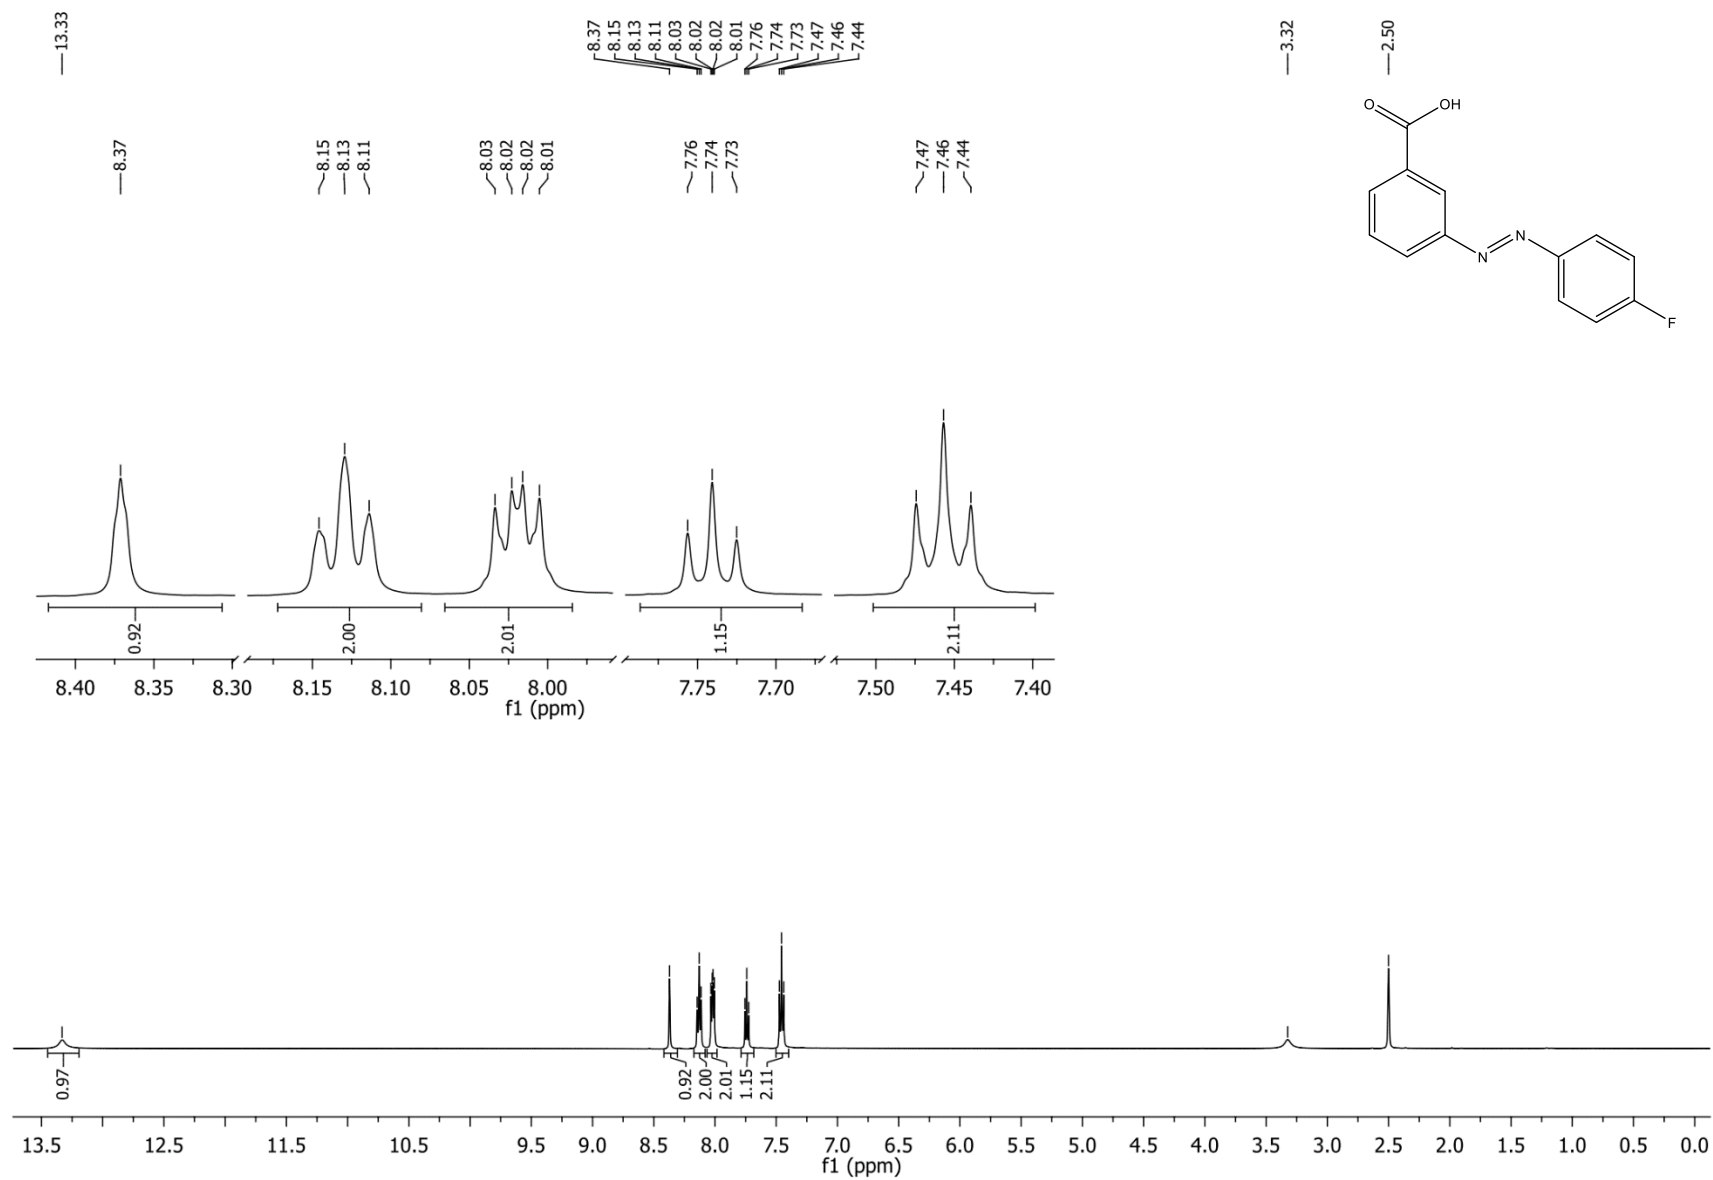

**Figure S48.**  $^1\text{H}$  NMR spectra of *m*-**3b** ((*E*)-3-((4-fluorophenyl)diazenyl)benzoic acid).

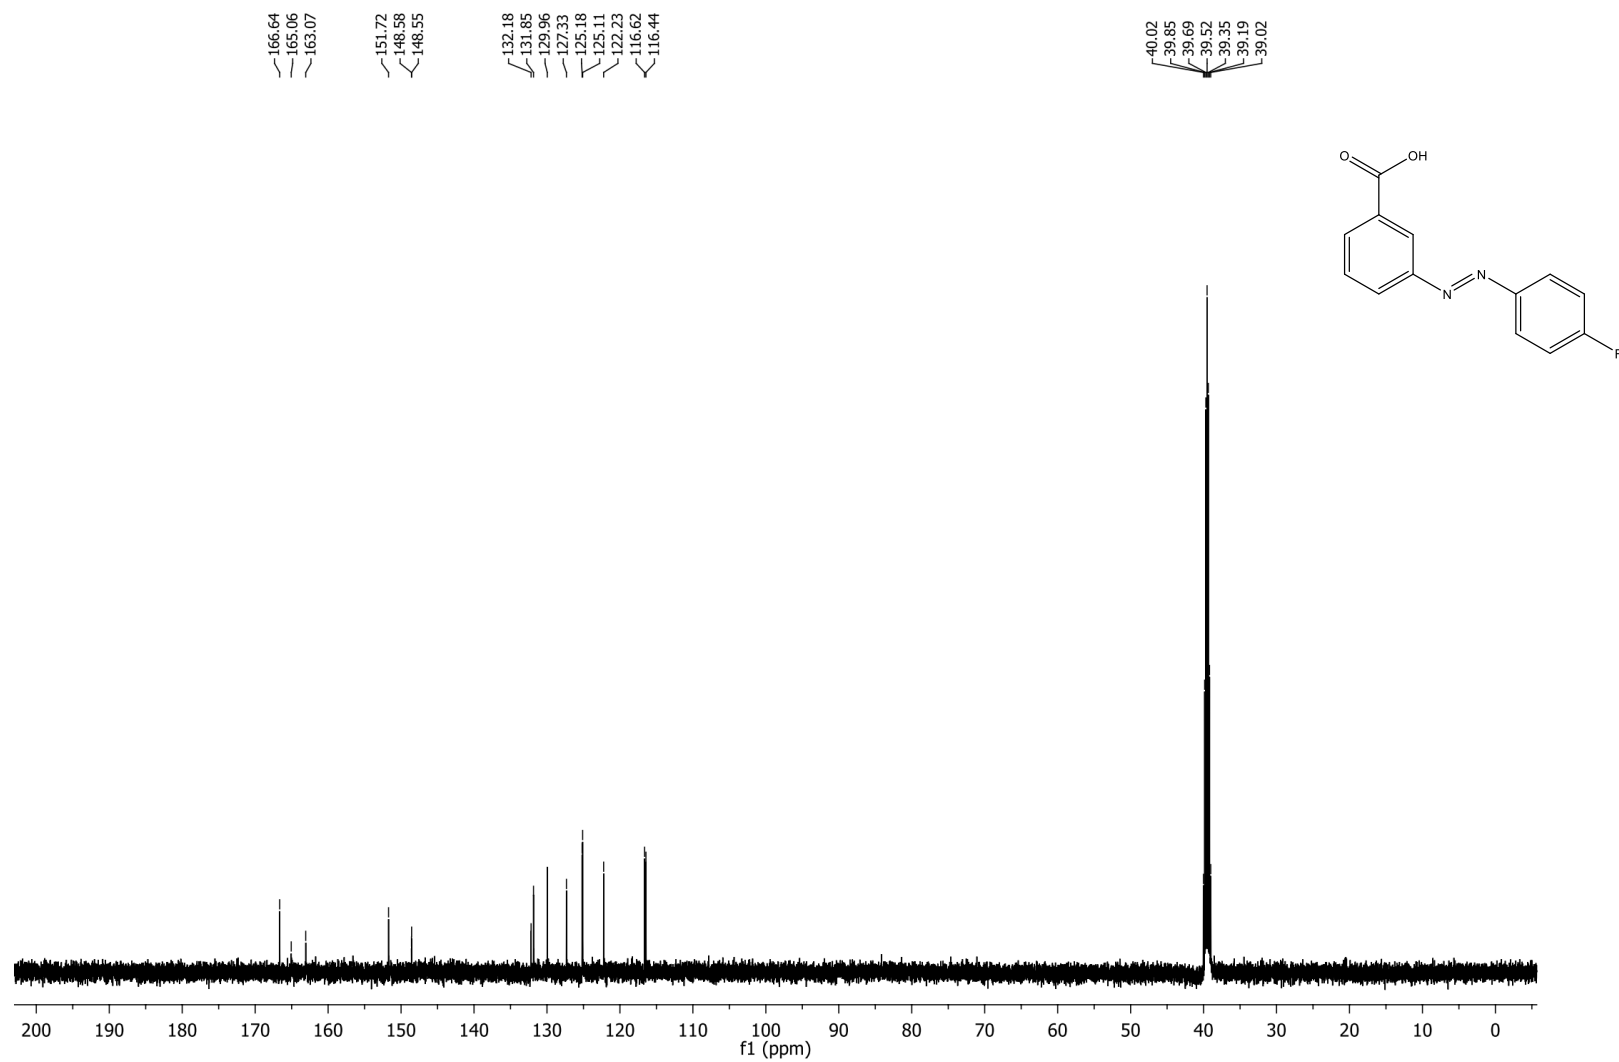

**Figure S49.** <sup>13</sup>C NMR spectra of *m*-**3b** ((*E*)-3-((4-fluorophenyl)diazenyl)benzoic acid).

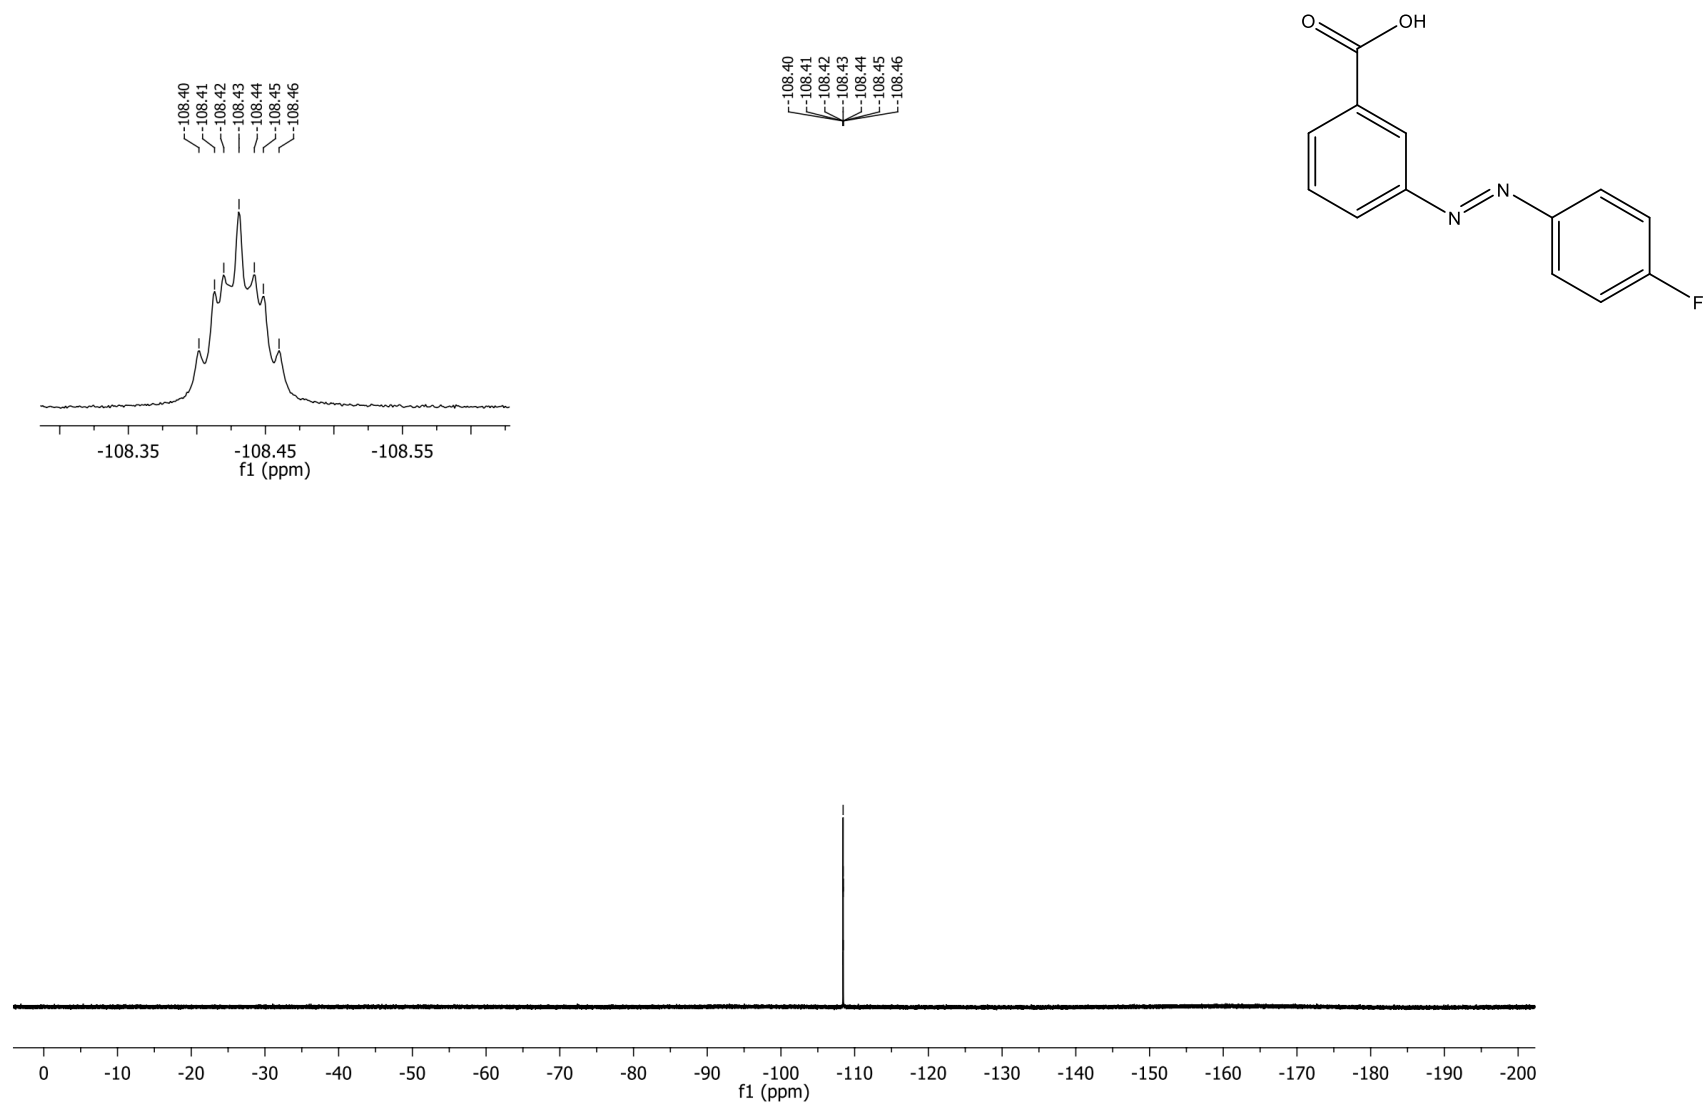

**Figure S50.**  $^{19}\text{F}$  NMR spectra of *m*-**3b** ((*E*)-3-((4-fluorophenyl)diazenyl)benzoic acid).

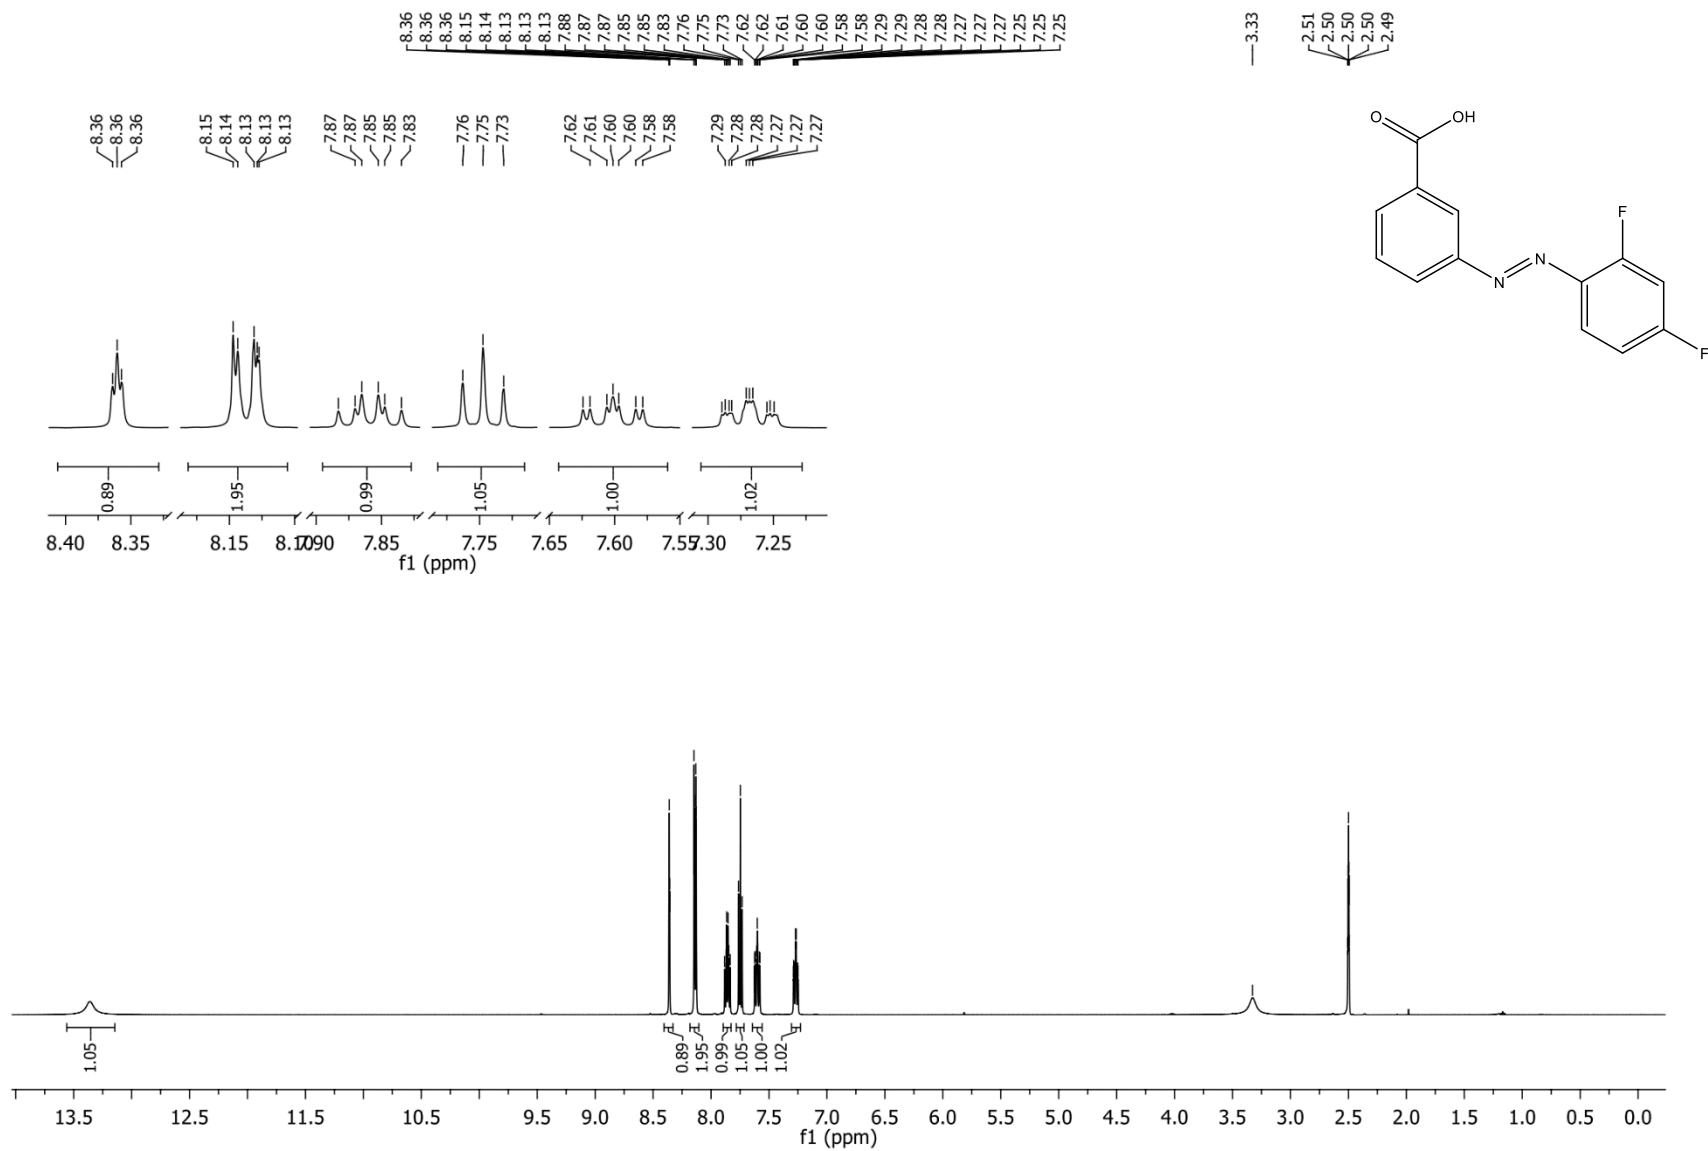

**Figure S51.**  $^1\text{H}$  NMR spectra of *m*-**3c** ((*E*)-3-((2,4-difluorophenyl)diazenyl)benzoic acid)

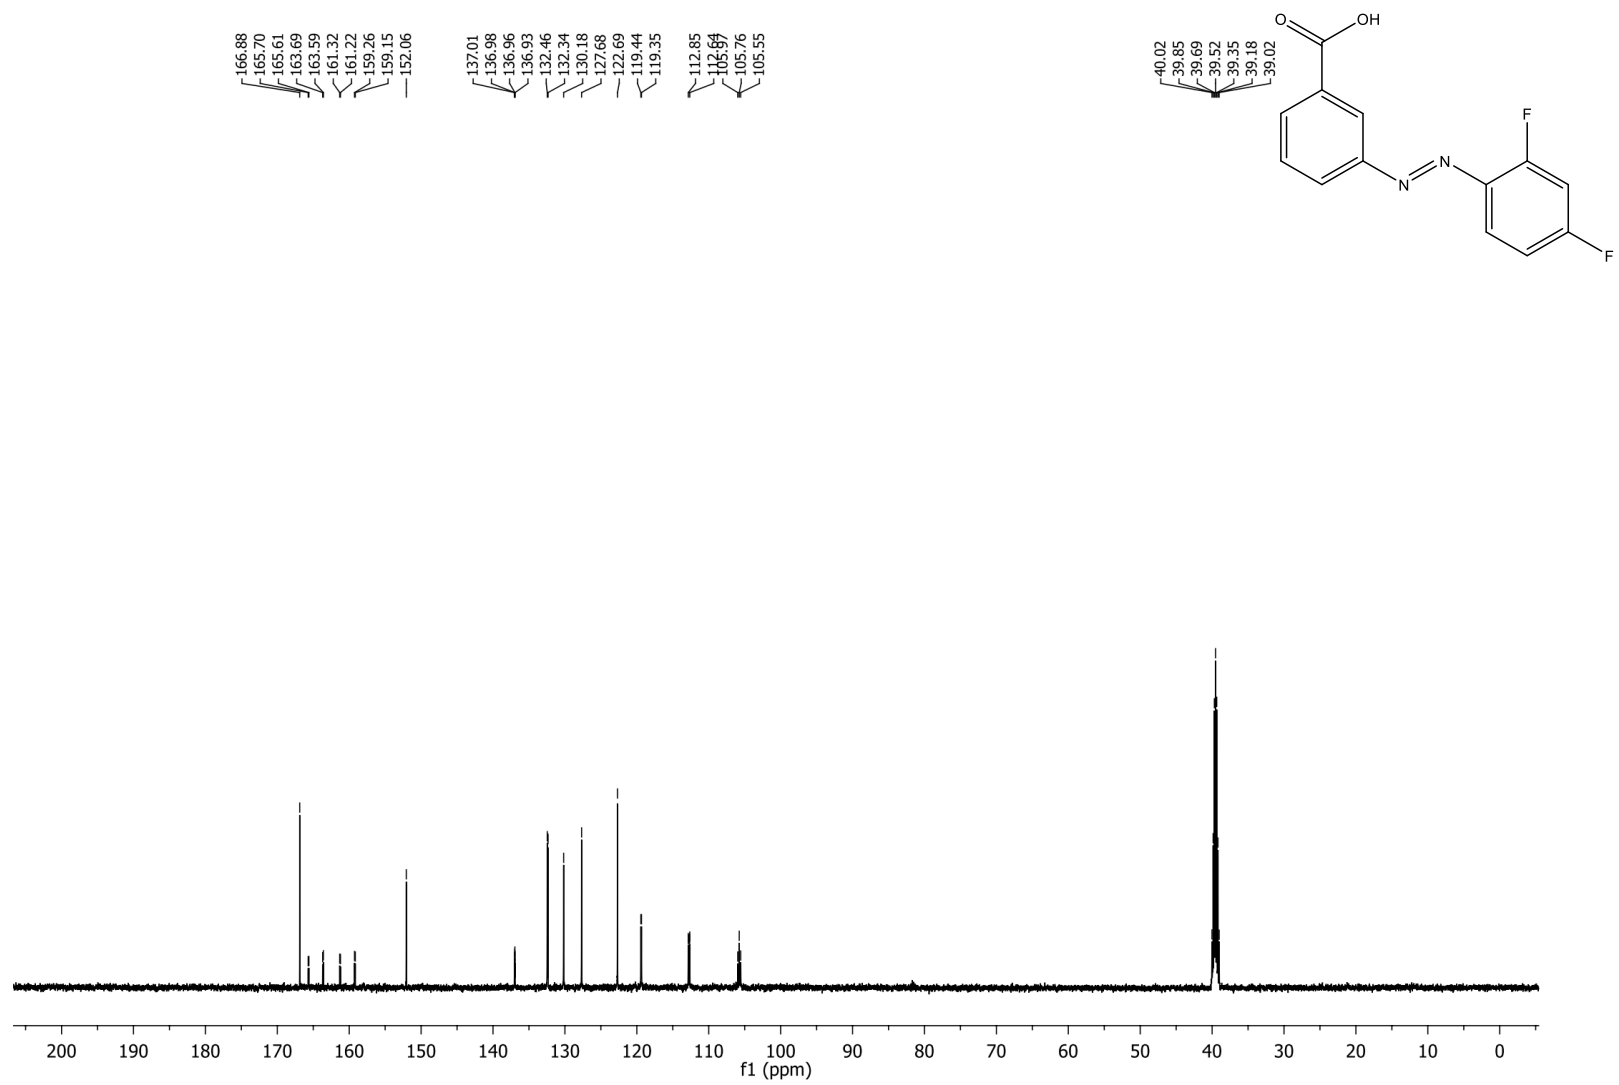

**Figure S52.**  $^{13}\text{C}$  NMR spectra of *m*-**3c** (*(E)*-3-((2,4-difluorophenyl)diazenyl)benzoic acid).

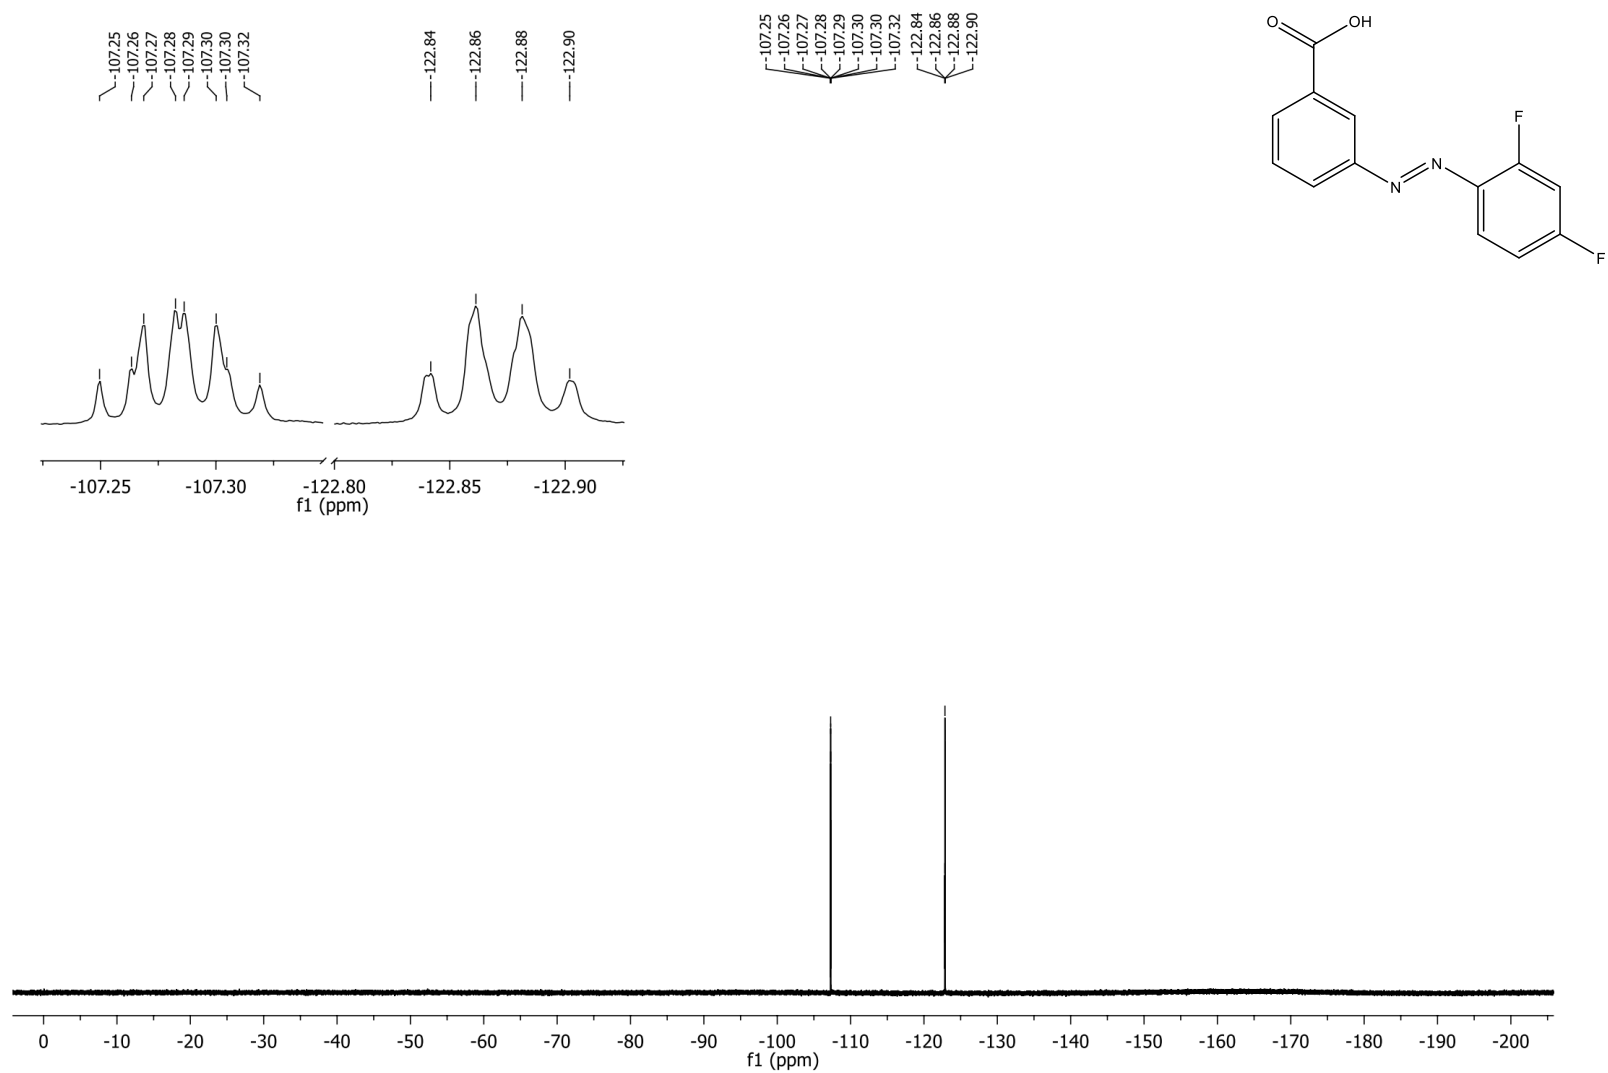

**Figure S53.**  $^{19}\text{F}$  NMR spectra of *m*-**3c** ((*E*)-3-((2,4-difluorophenyl)diazenyl)benzoic acid).



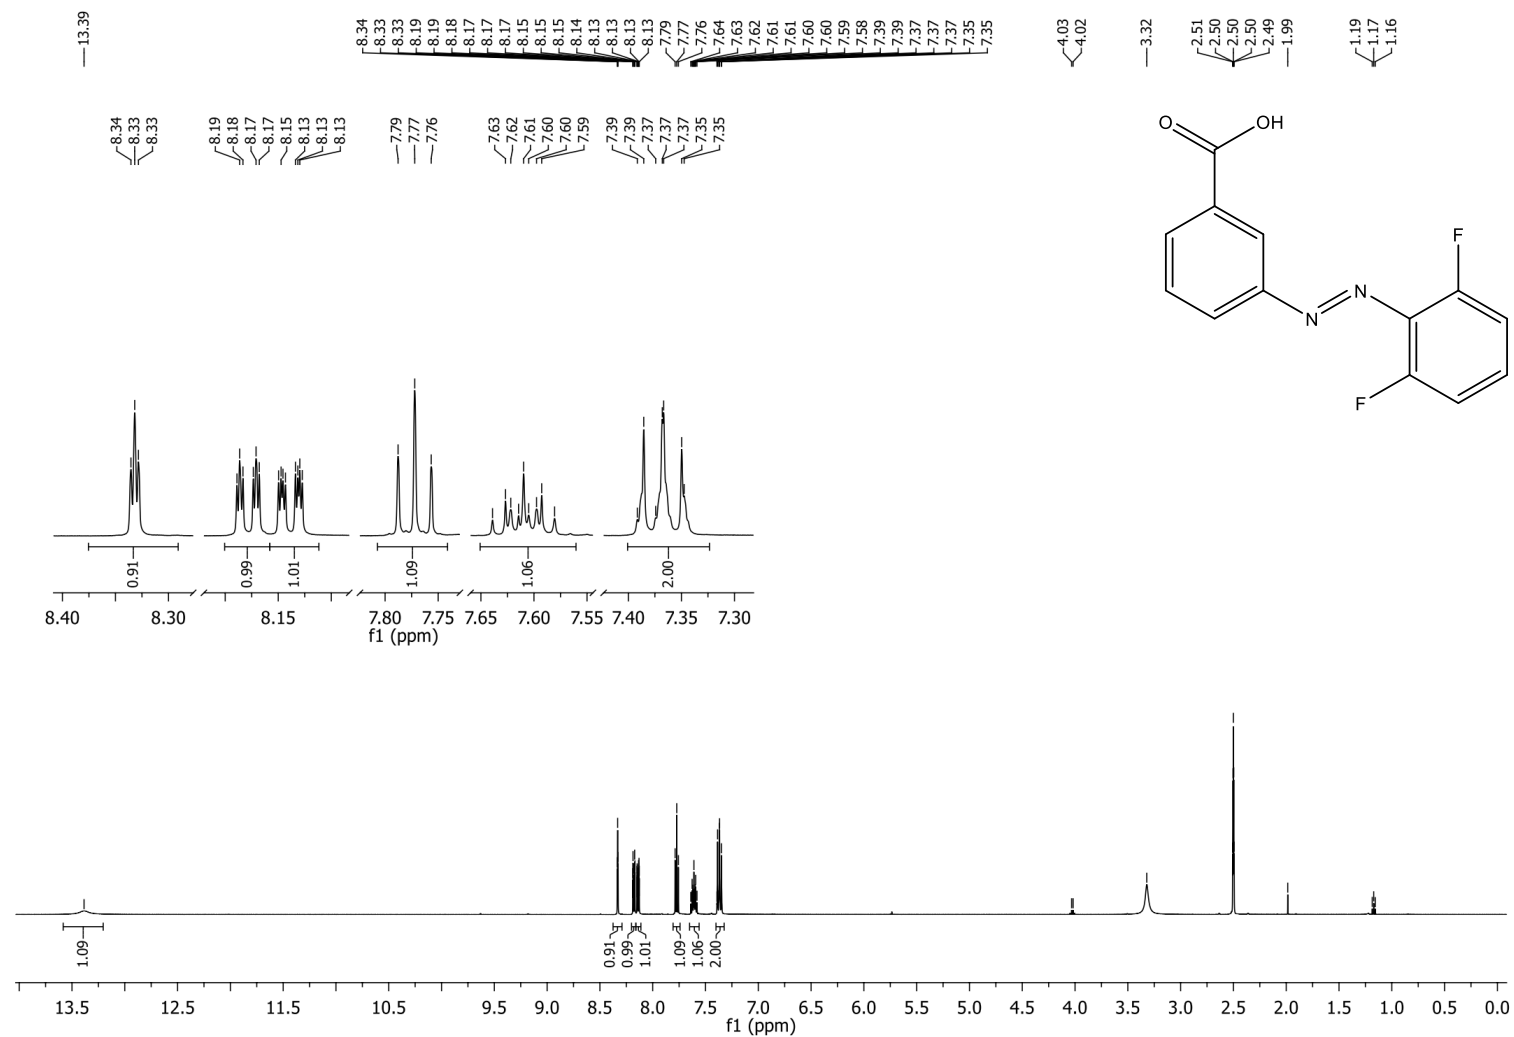

**Figure S54.**  $^1\text{H}$  NMR spectra of *m*-**3d** ((*E*)-3-((2,6-difluorophenyl)diazenyl)benzoic acid).

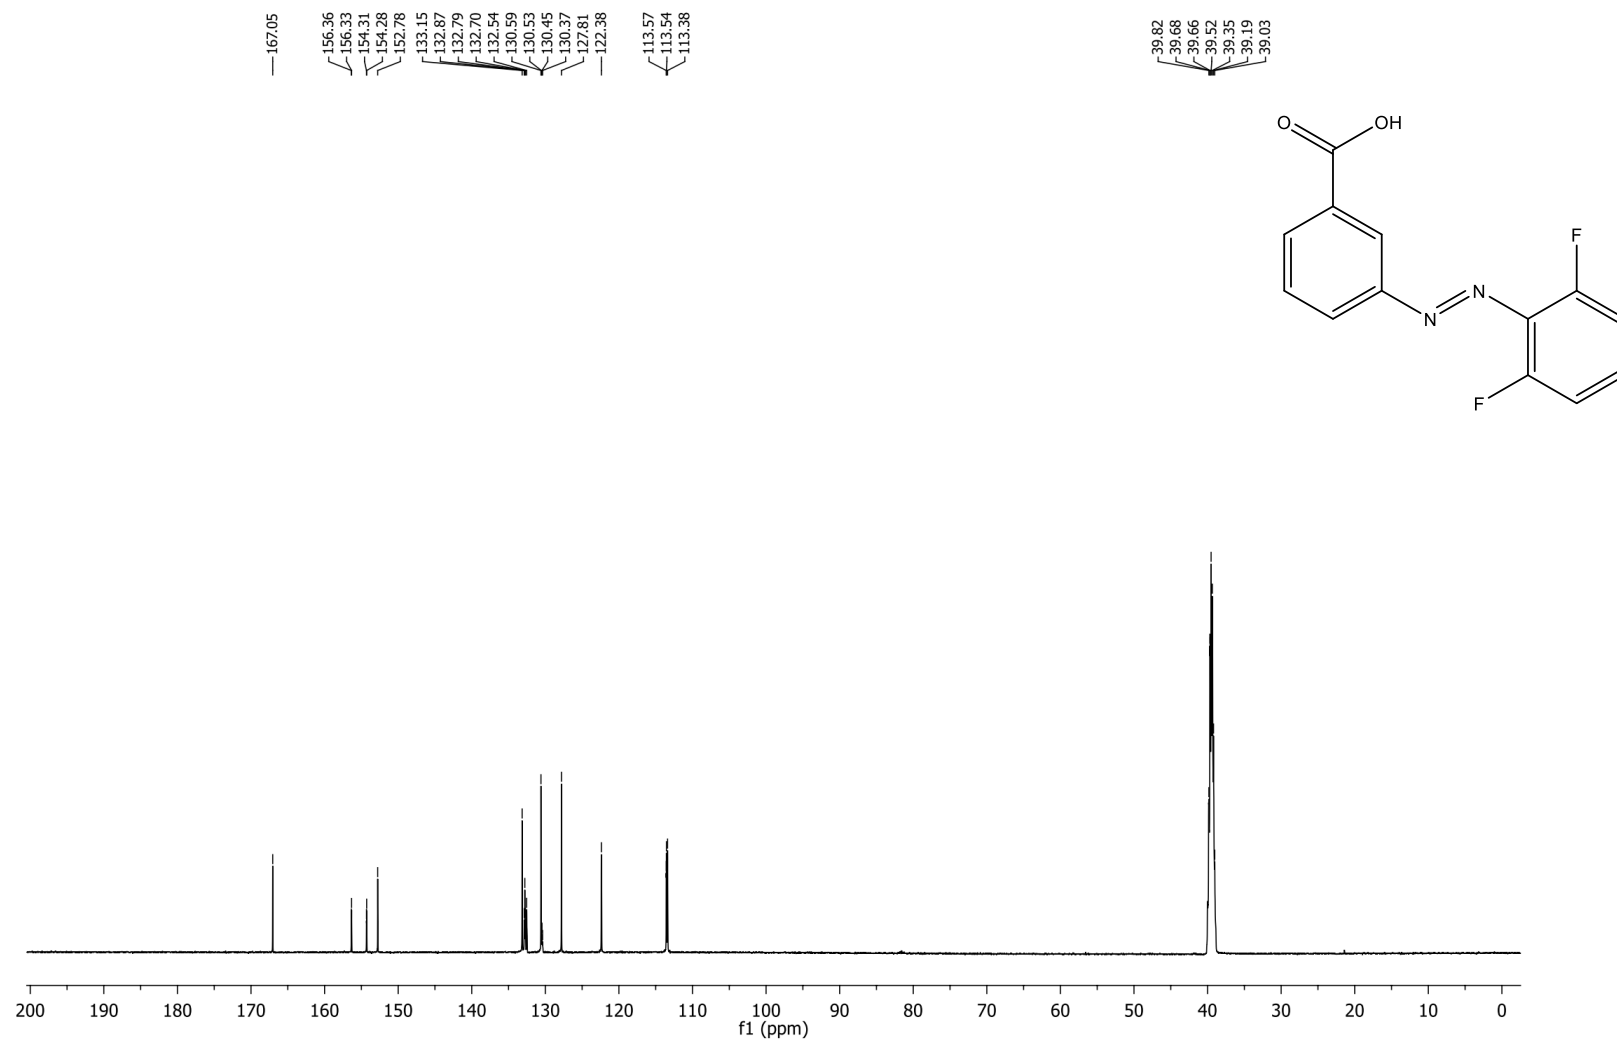

**Figure S55.** <sup>13</sup>C NMR spectra of *m*-3d ((*E*)-3-((2,6-difluorophenyl)diazenyl)benzoic acid).

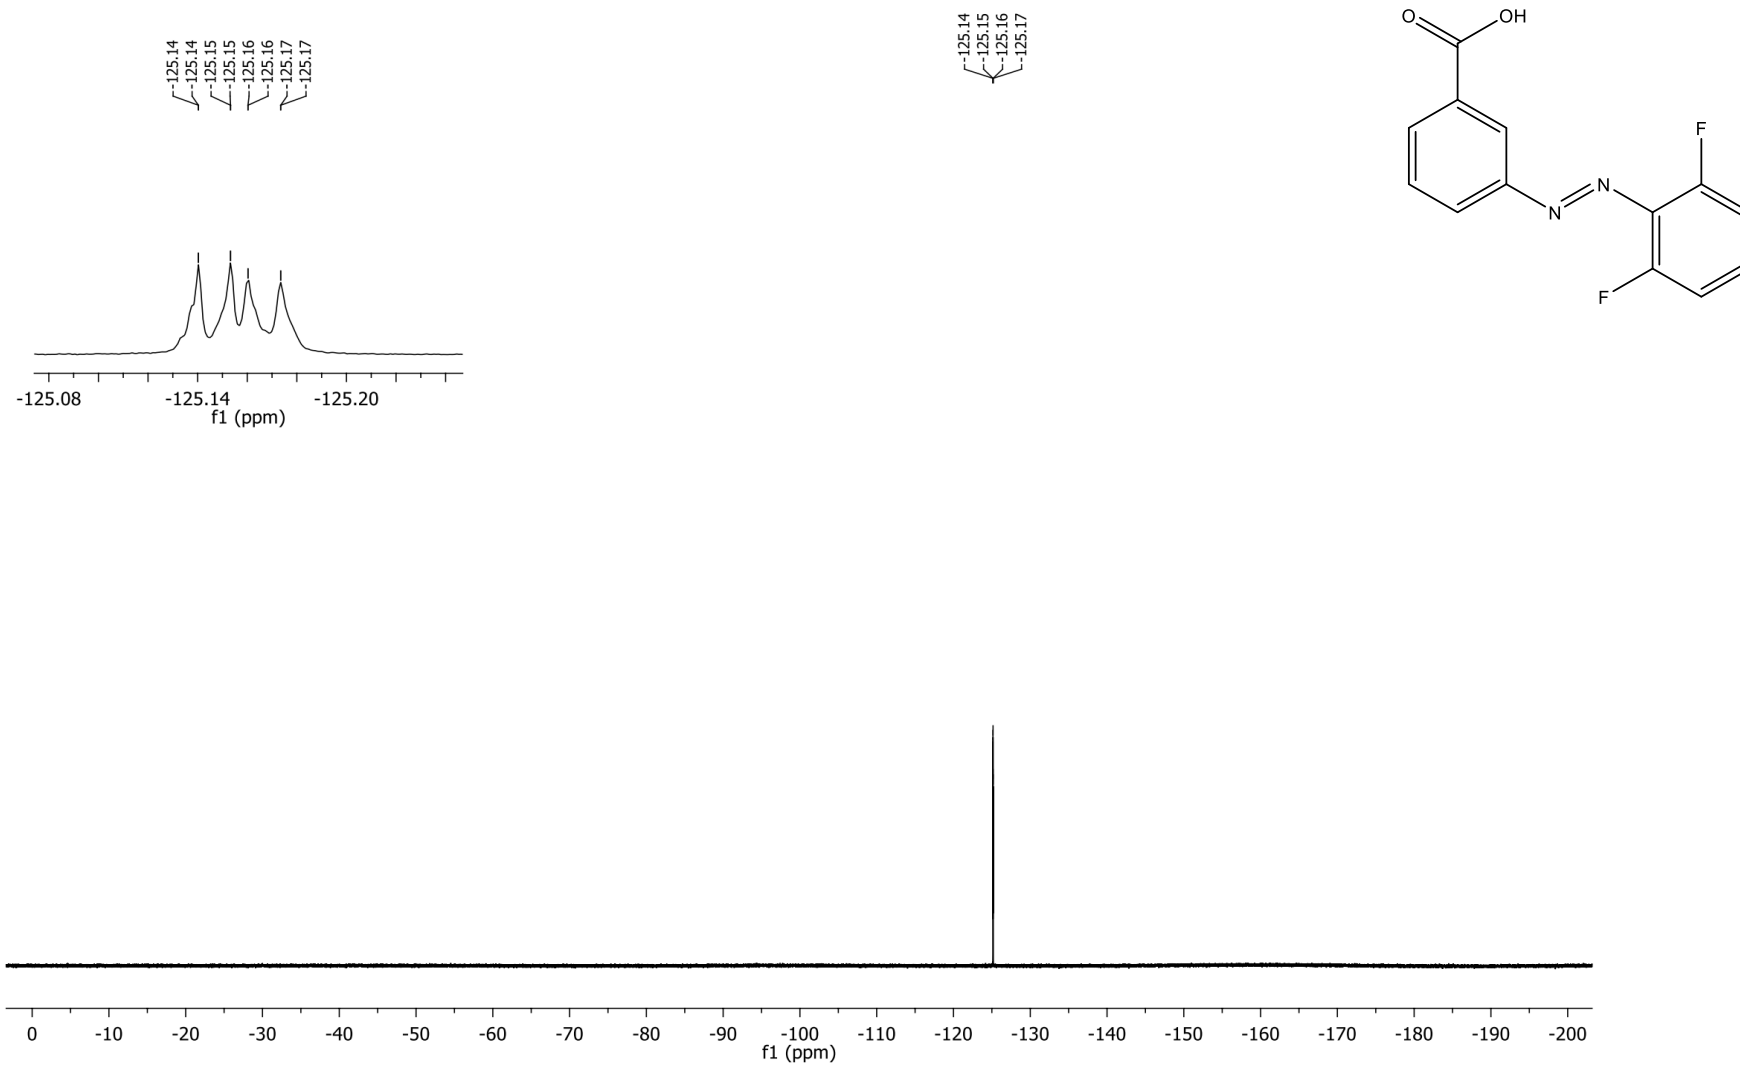

**Figure S56.**  $^{19}\text{F}$  NMR spectra of *m*-**3d** ((*E*)-3-((2,6-difluorophenyl)diazenyl)benzoic acid).

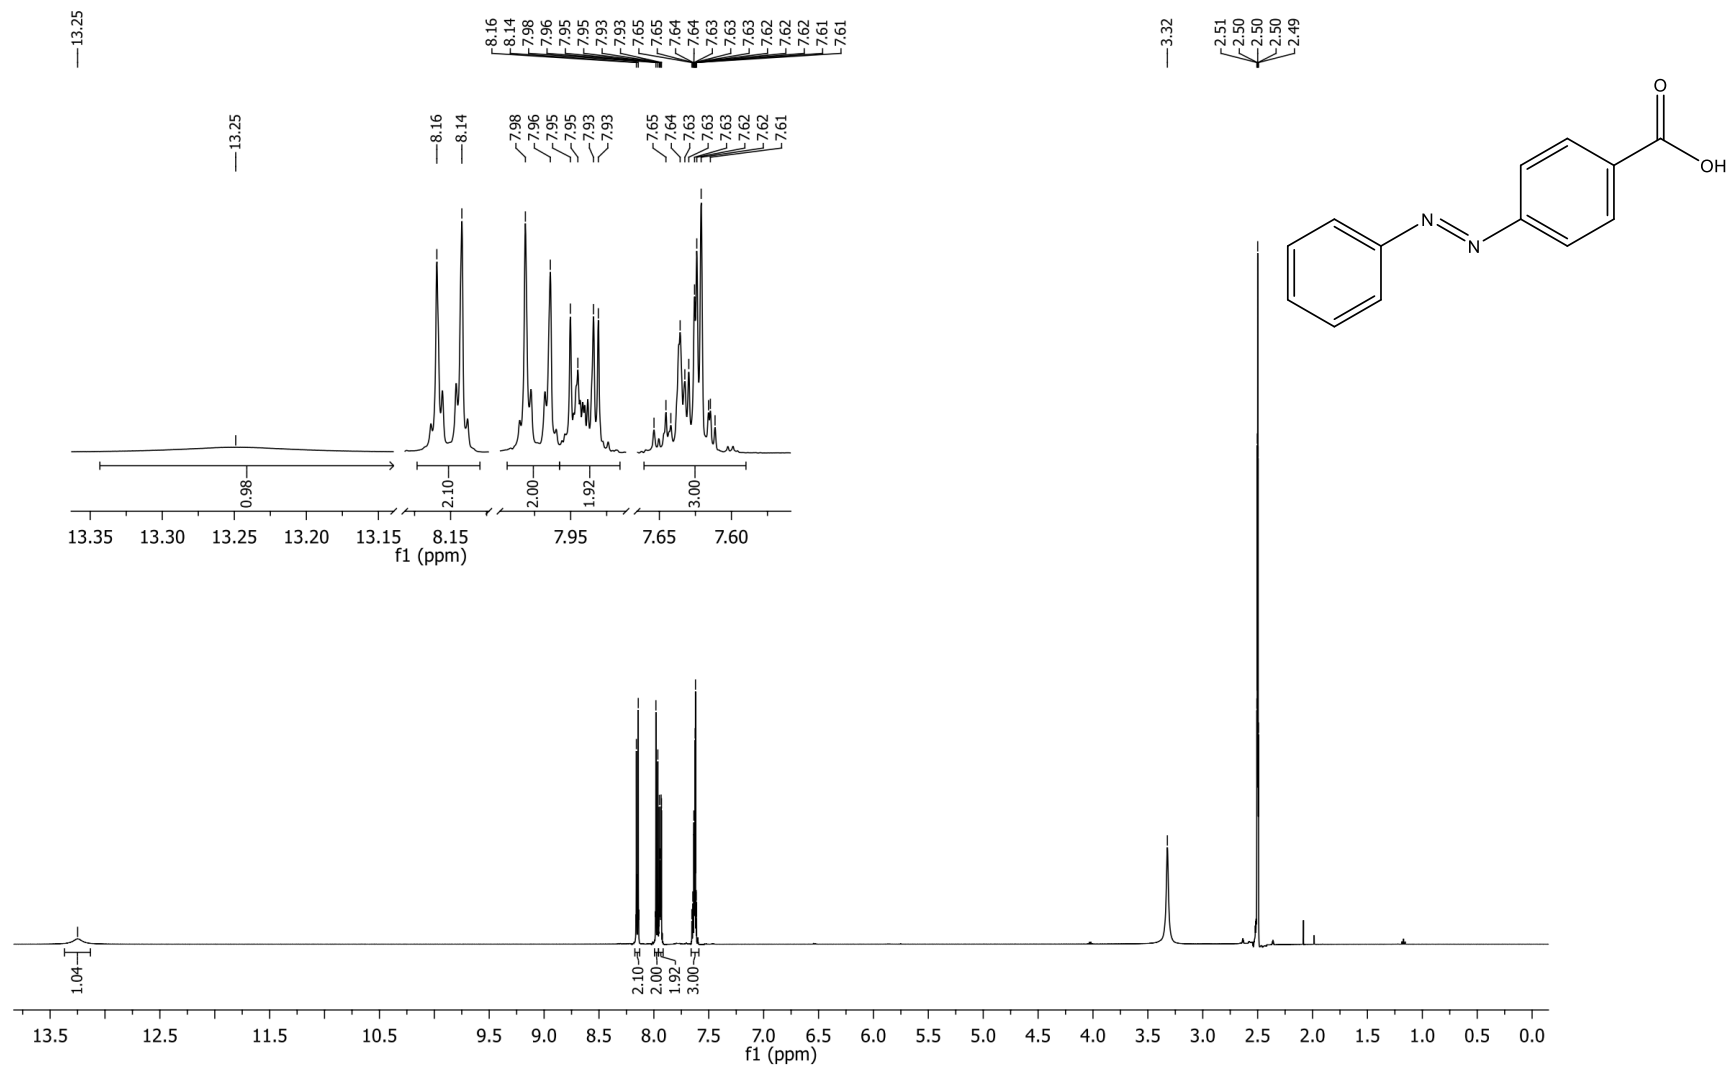

**Figure S57.**  $^1\text{H}$  NMR spectra of *p*-3a ((*E*)-4-(phenyldiazenyl)benzoic acid).

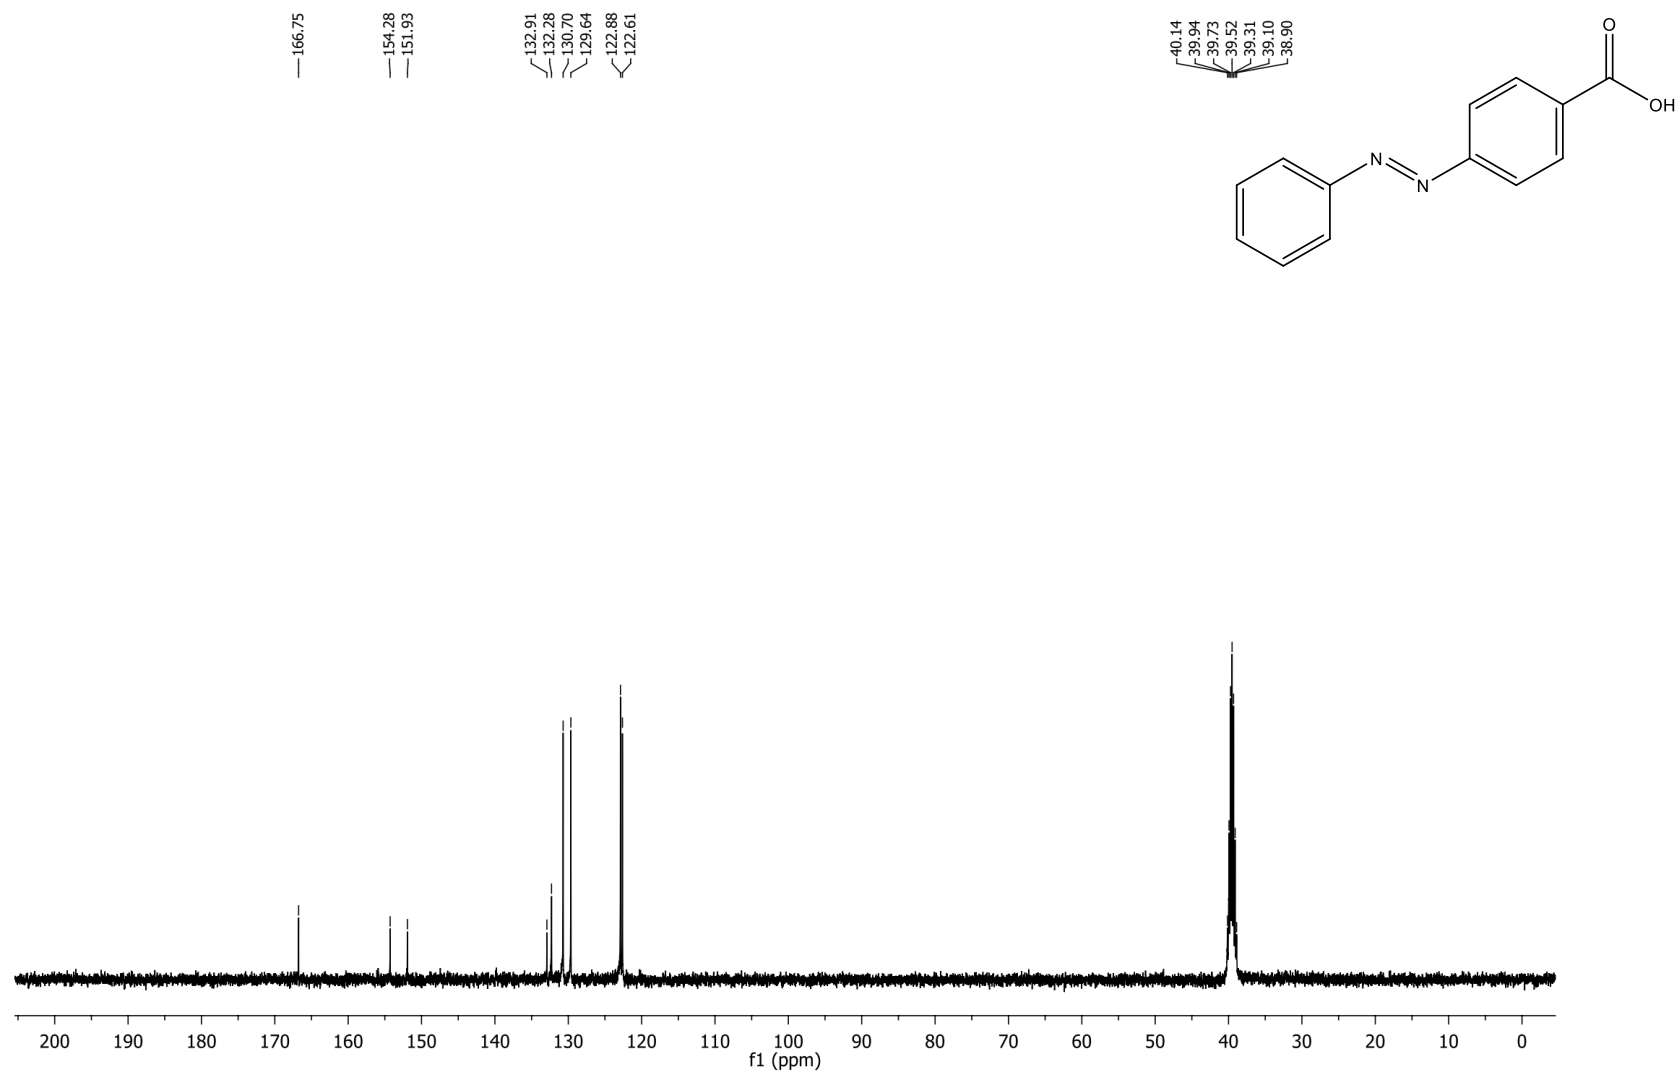

**Figure S58.** <sup>13</sup>C NMR spectra of *p*-**3a** ((*E*)-4-(phenyldiazenyl)benzoic acid).

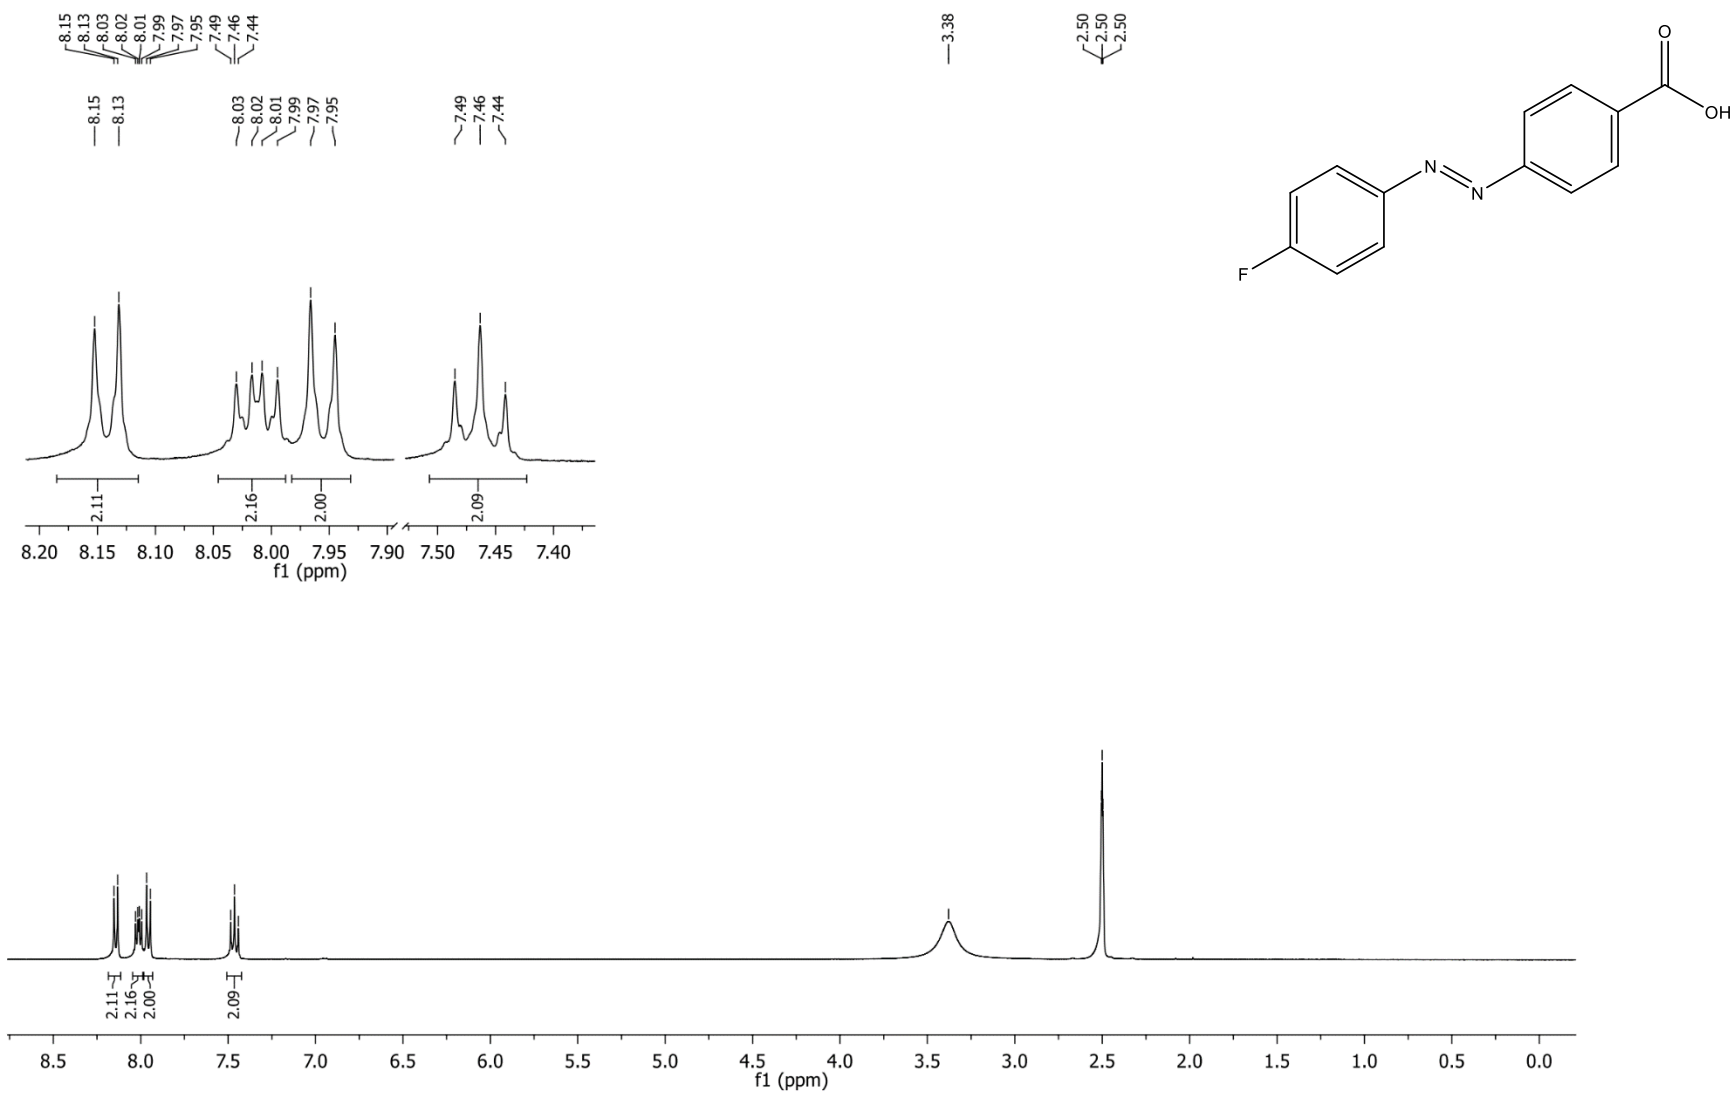

**Figure S59.**  $^1\text{H}$  NMR spectra of *p*-**3b** ((*E*)-4-((4-fluorophenyl)diazenyl)benzoic acid).

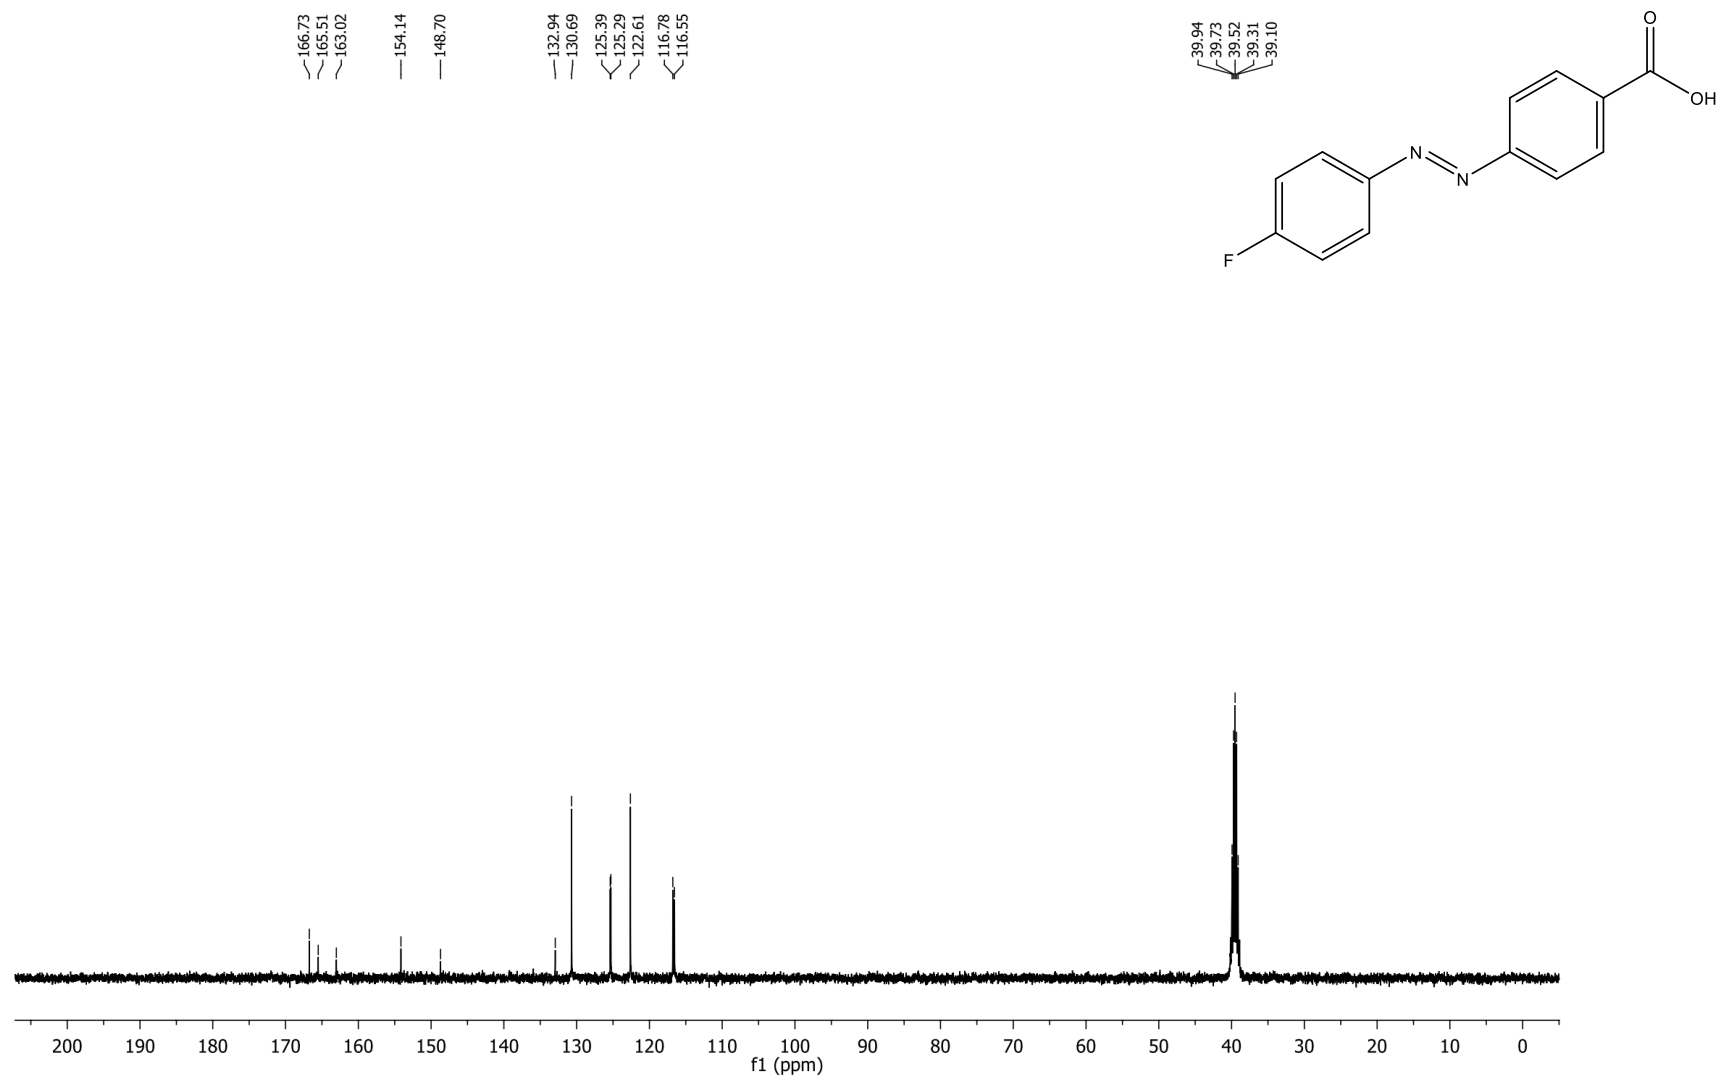

**Figure S60.** <sup>13</sup>C NMR spectra of *p*-**3b** ((*E*)-4-((4-fluorophenyl)diazenyl)benzoic acid).

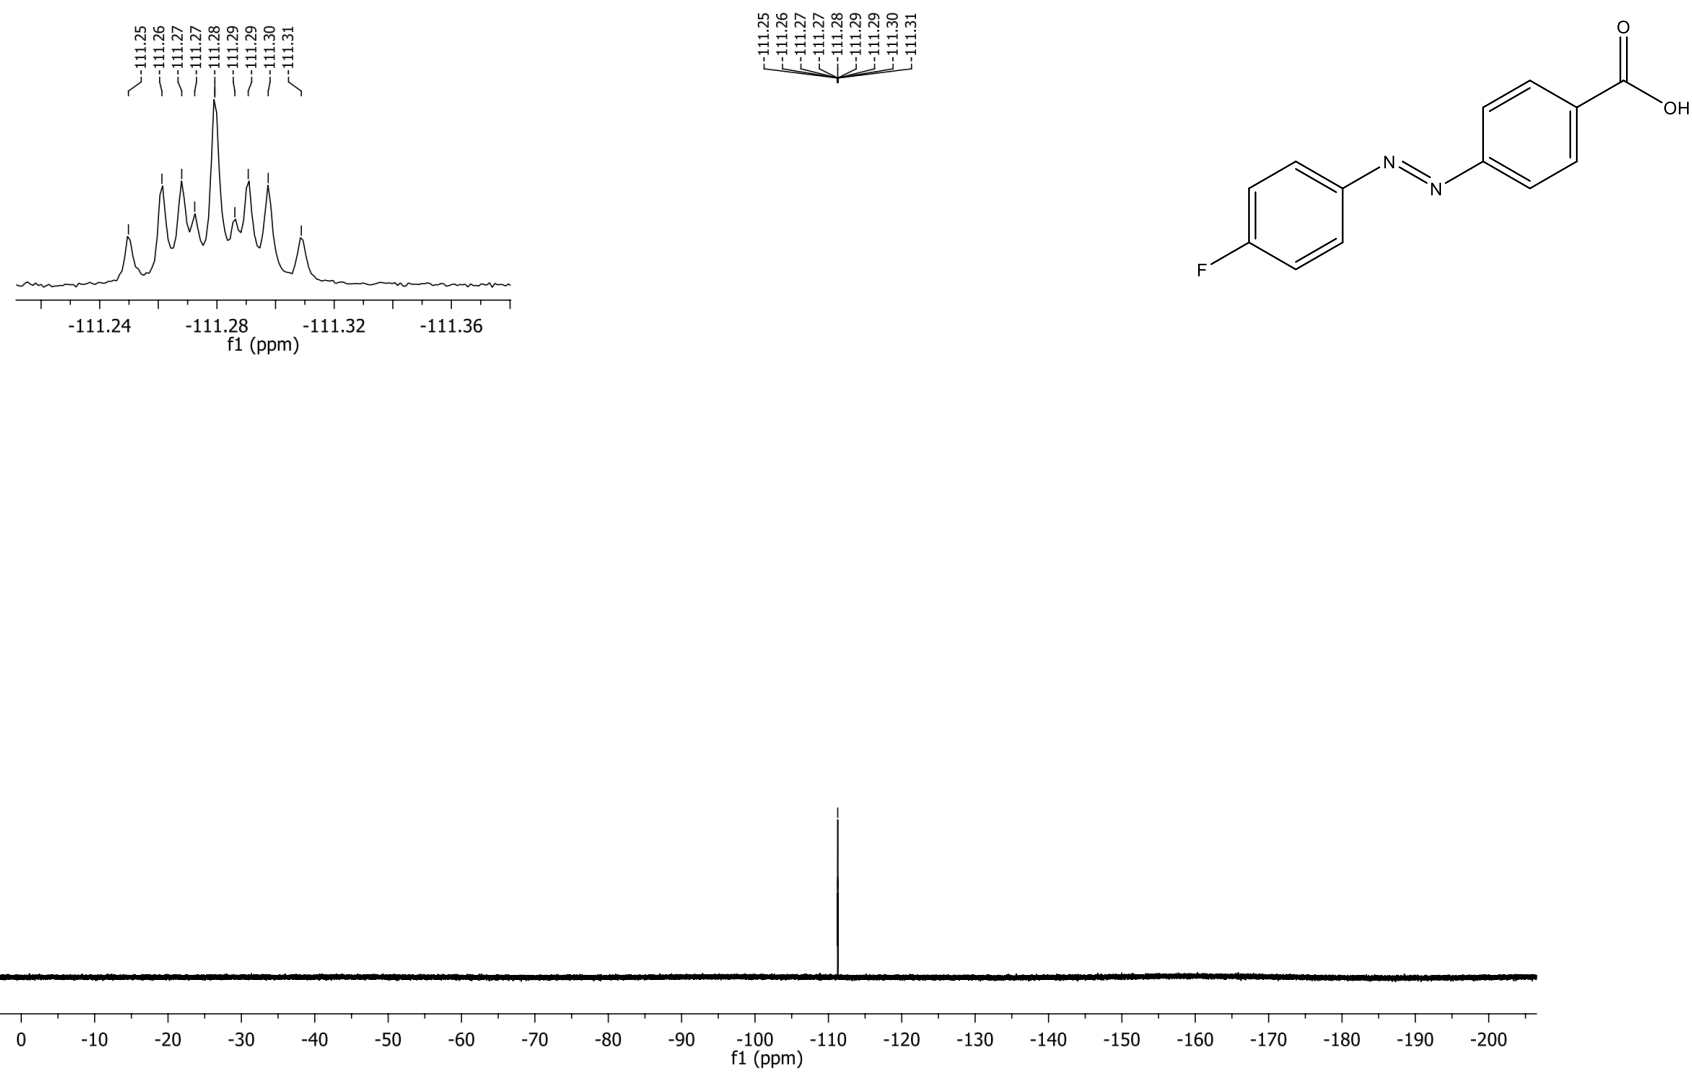

**Figure S61.**  $^{19}\text{F}$  NMR spectra of *p*-**3b** (*(E)*-4-((4-fluorophenyl)diazenyl)benzoic acid).



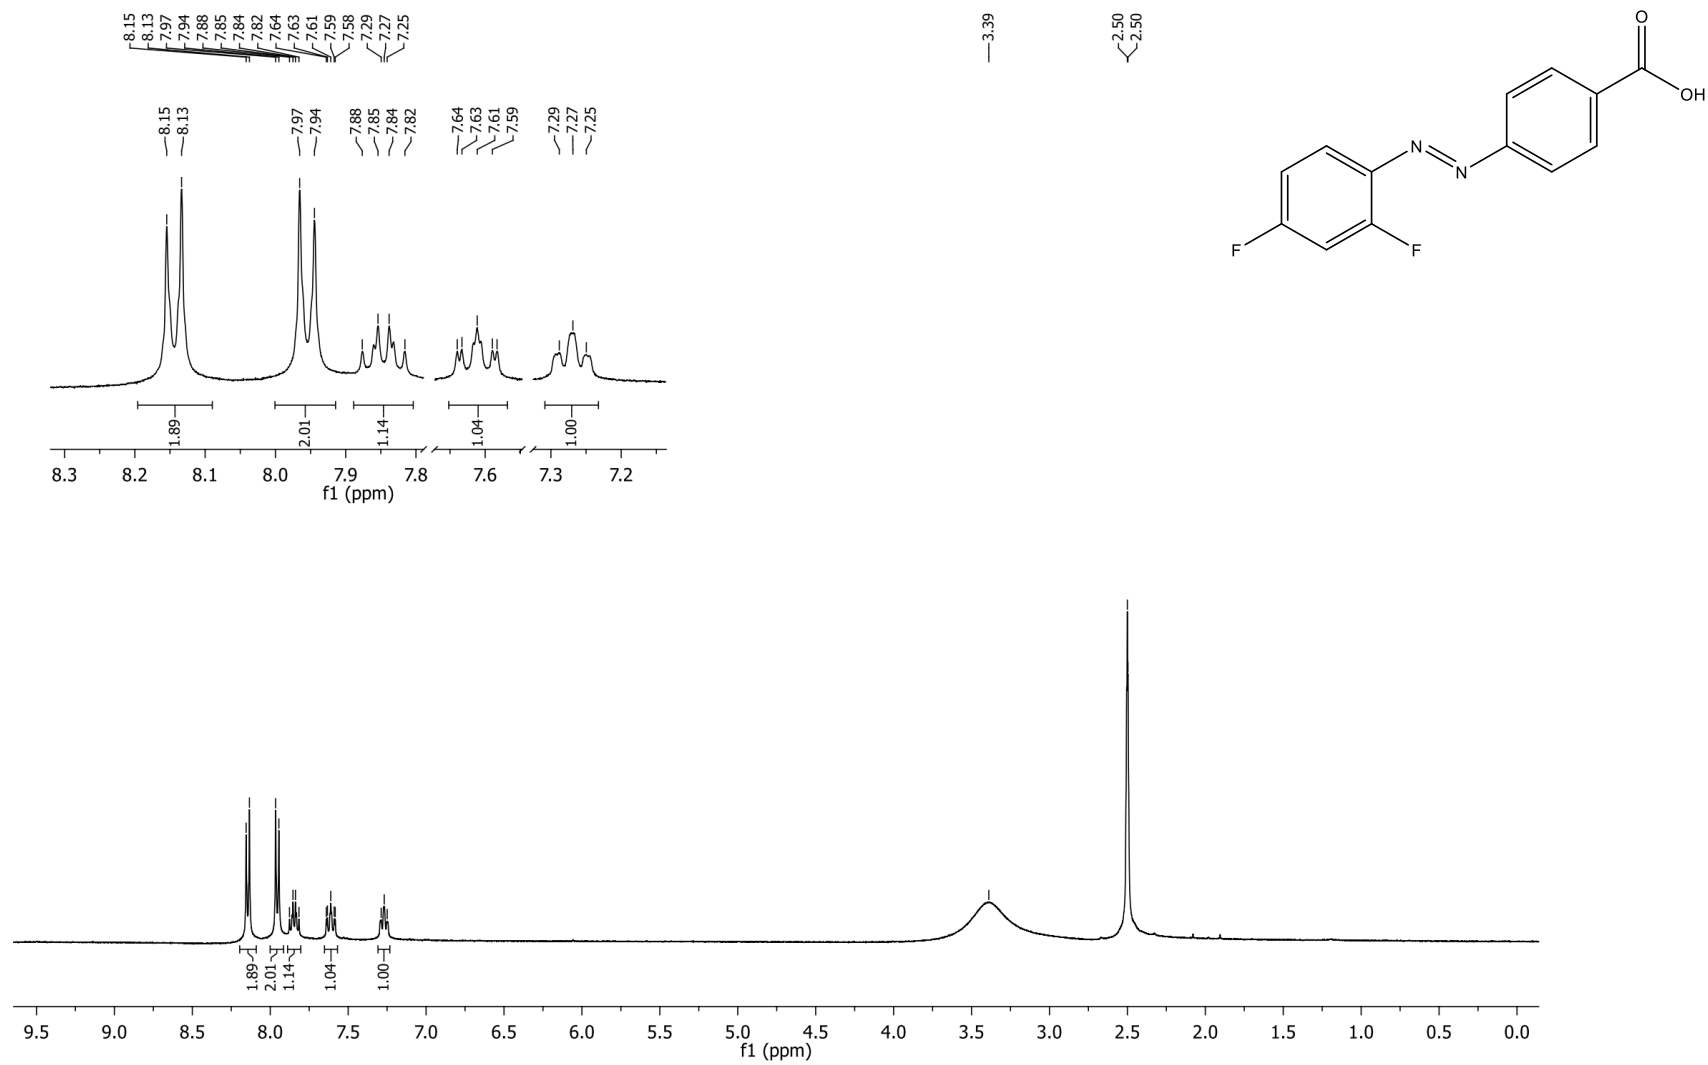

**Figure S62.**  $^1\text{H}$  NMR spectra of *p*-**3c** ((*E*)-4-((2,4-difluorophenyl)diazenyl)benzoic acid).

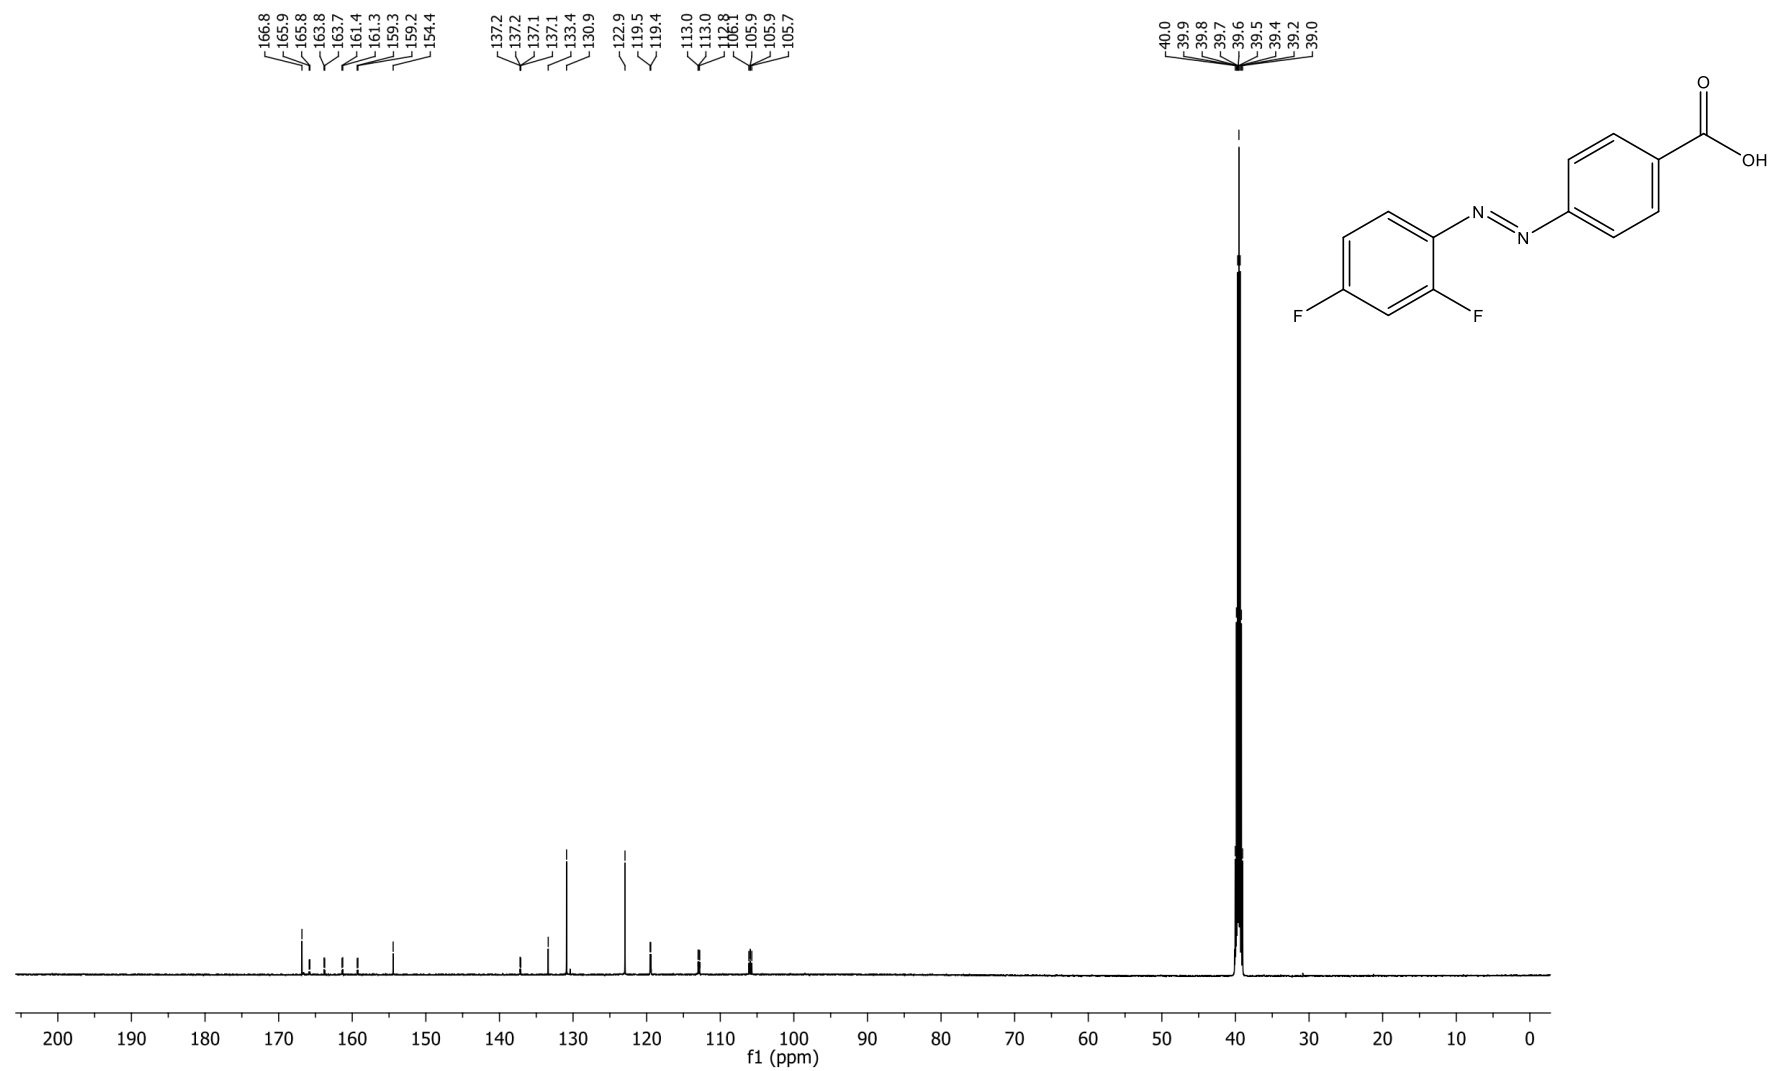

**Figure S63.** <sup>13</sup>C NMR spectra of *p*-**3c** ((*E*)-4-((2,4-difluorophenyl)diazenyl)benzoic acid).

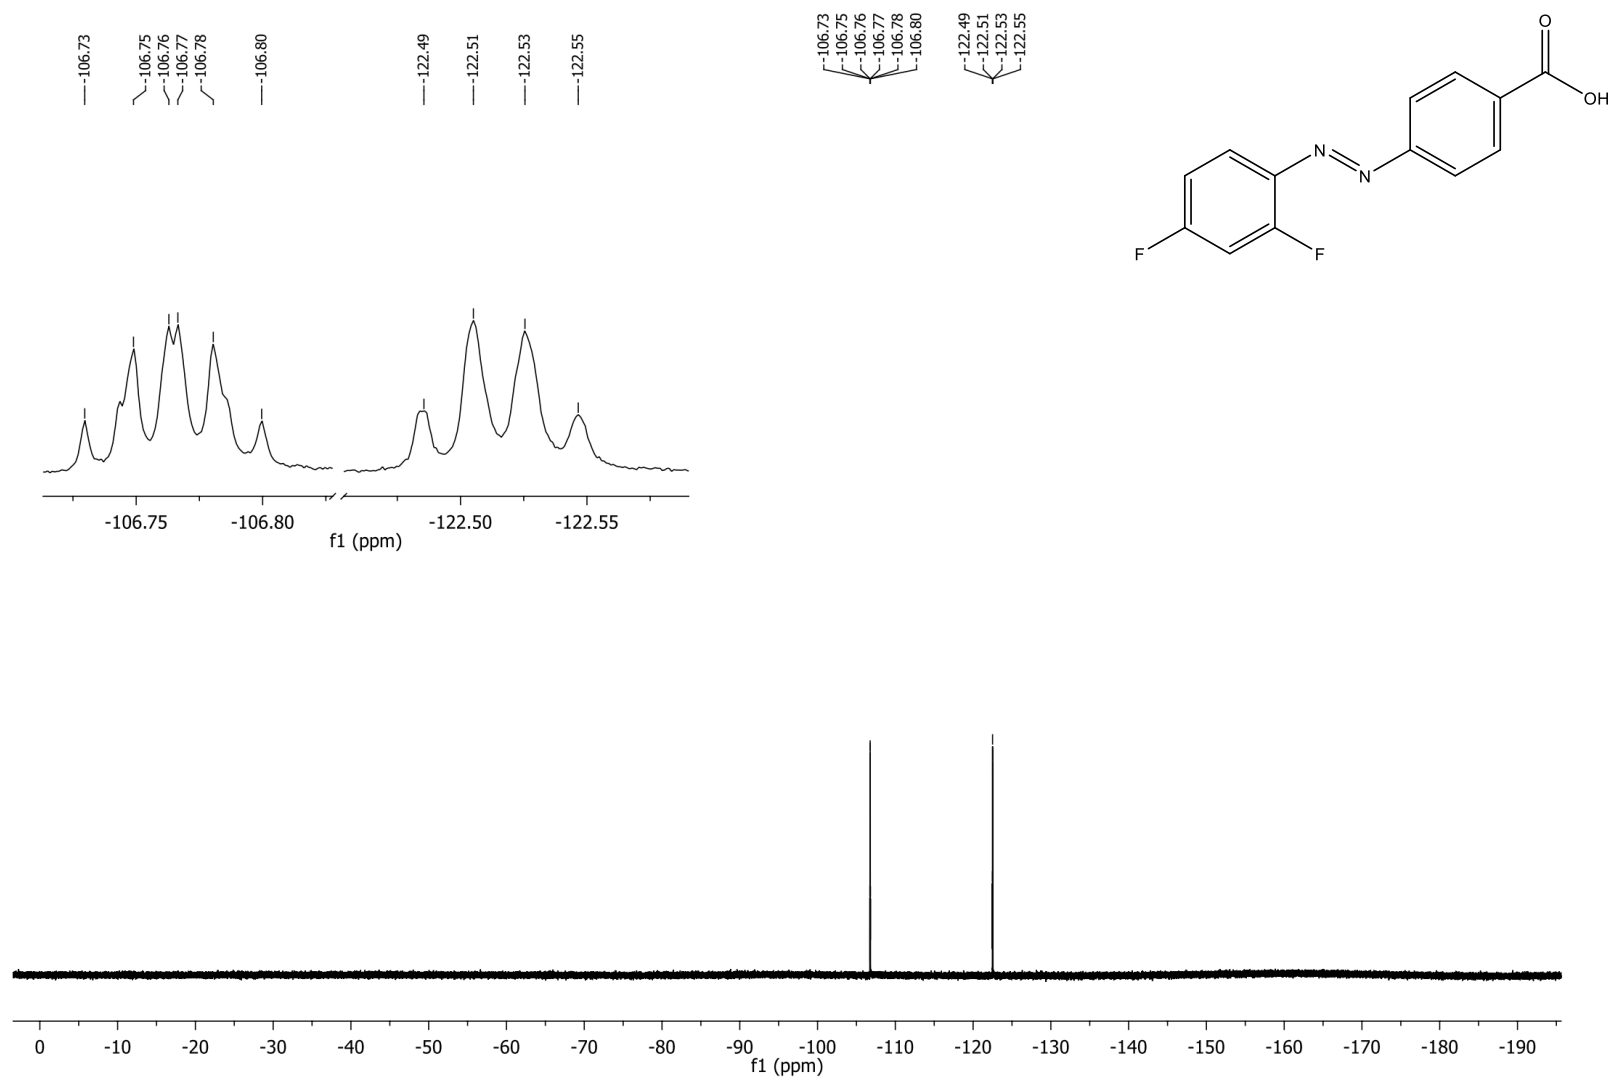

**Figure S64.**  $^{19}\text{F}$  NMR spectra of *p*-3c ((*E*)-4-((2,4-difluorophenyl)diazenyl)benzoic acid).

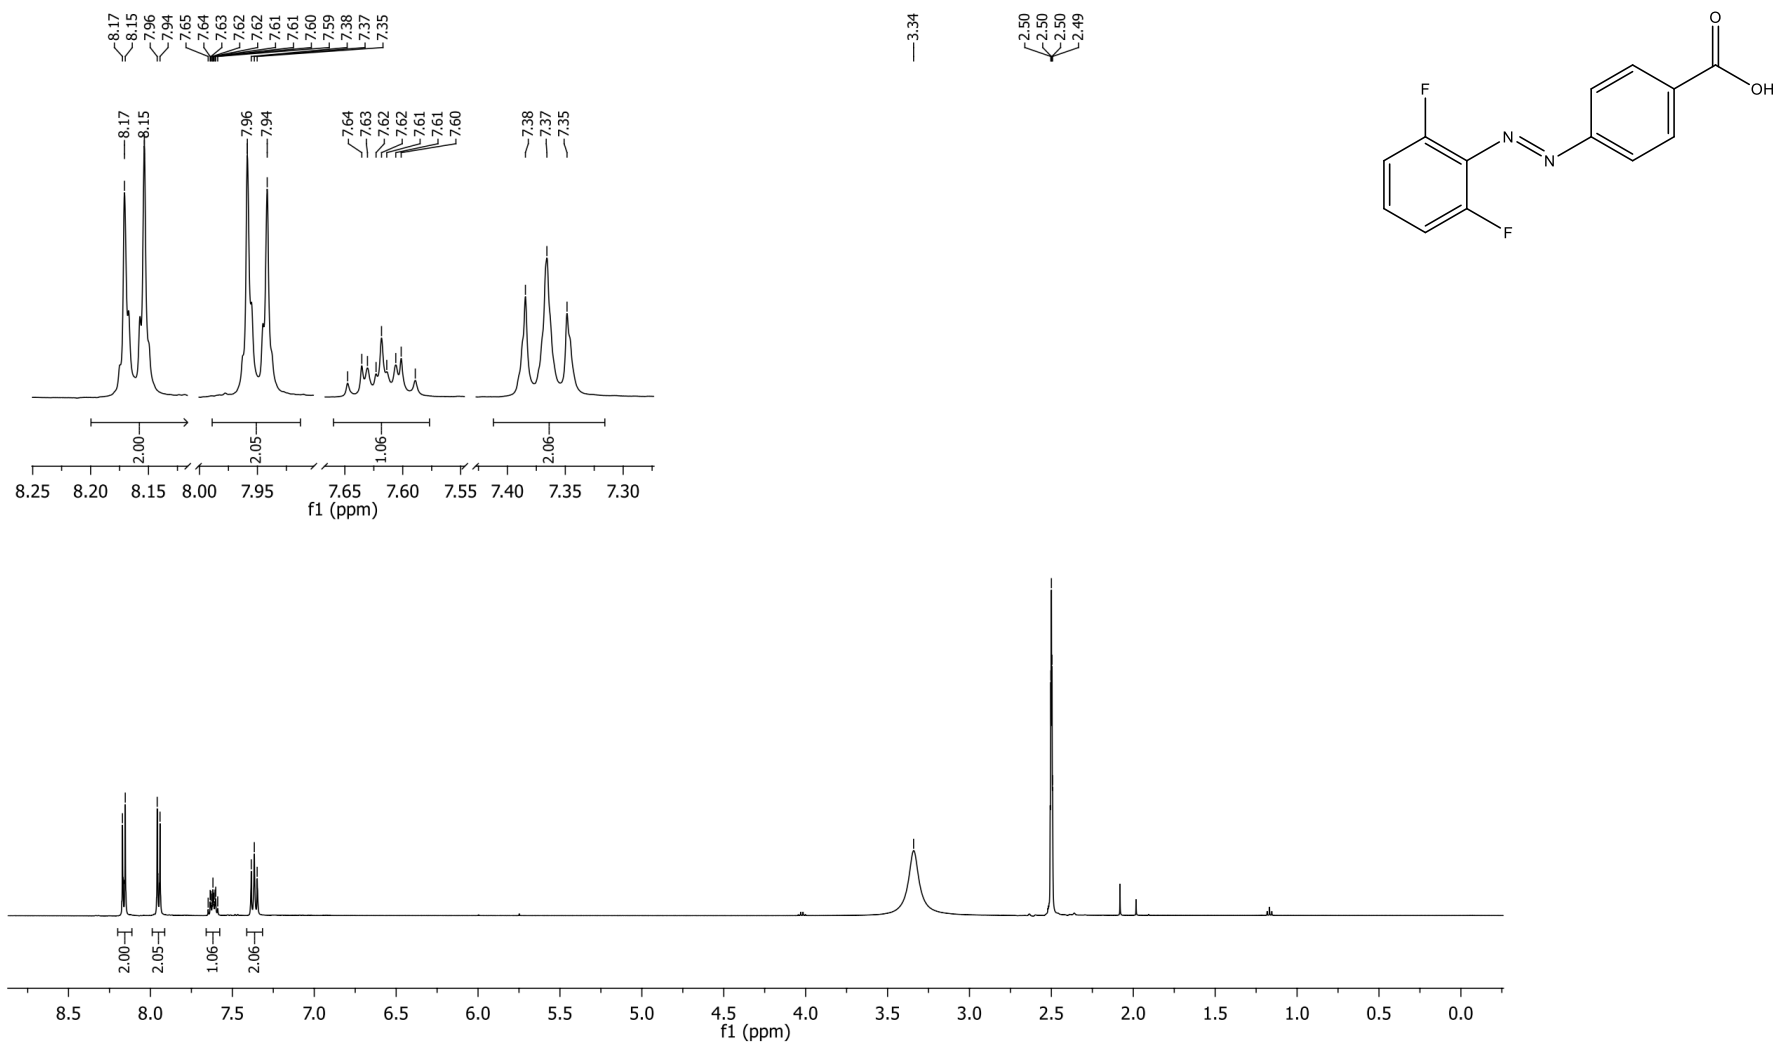

**Figure S65.**  $^1\text{H}$  NMR spectra of *p*-3d ((*E*)-4-((2,6-difluorophenyl)diazenyl)benzoic acid).

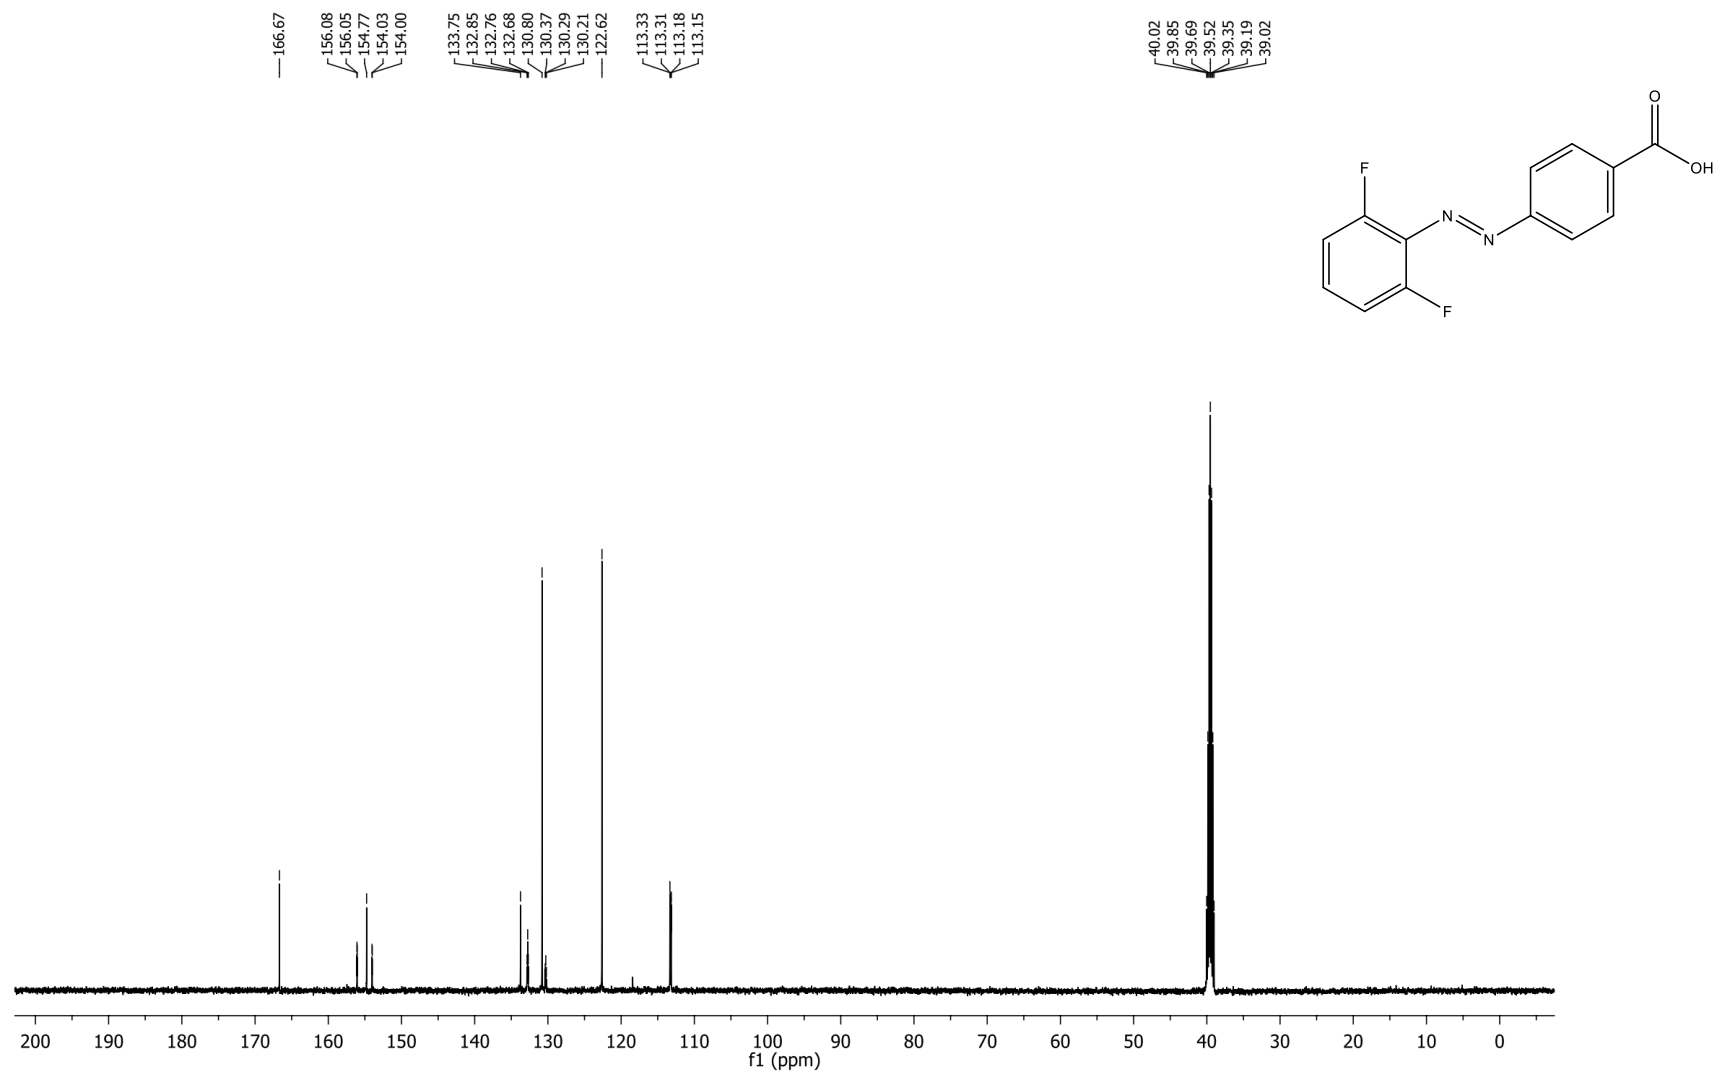

**Figure S66.** <sup>13</sup>C NMR spectra of *p*-**3d** ((*E*)-4-((2,6-difluorophenyl)diazenyl)benzoic acid).

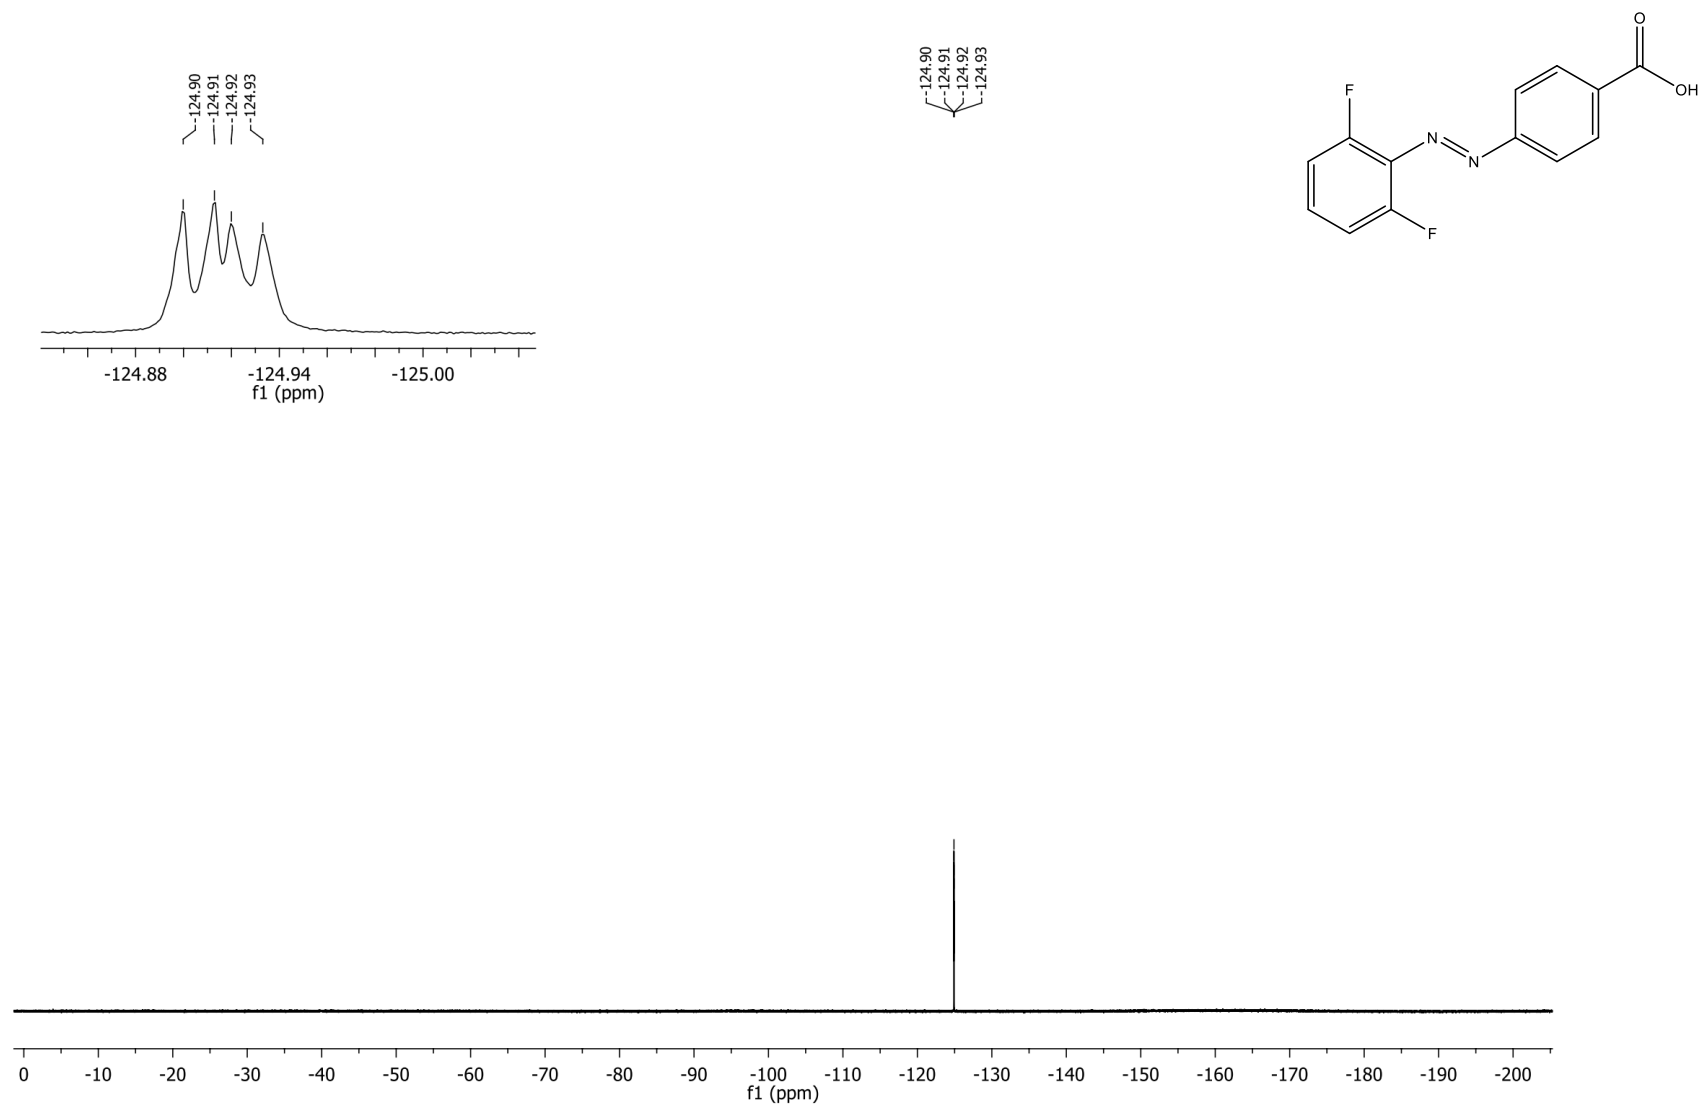

**Figure S67.**  $^{19}\text{F}$  NMR spectra of *p*-**3d** ((*E*)-4-((2,6-difluorophenyl)diazenyl)benzoic acid).

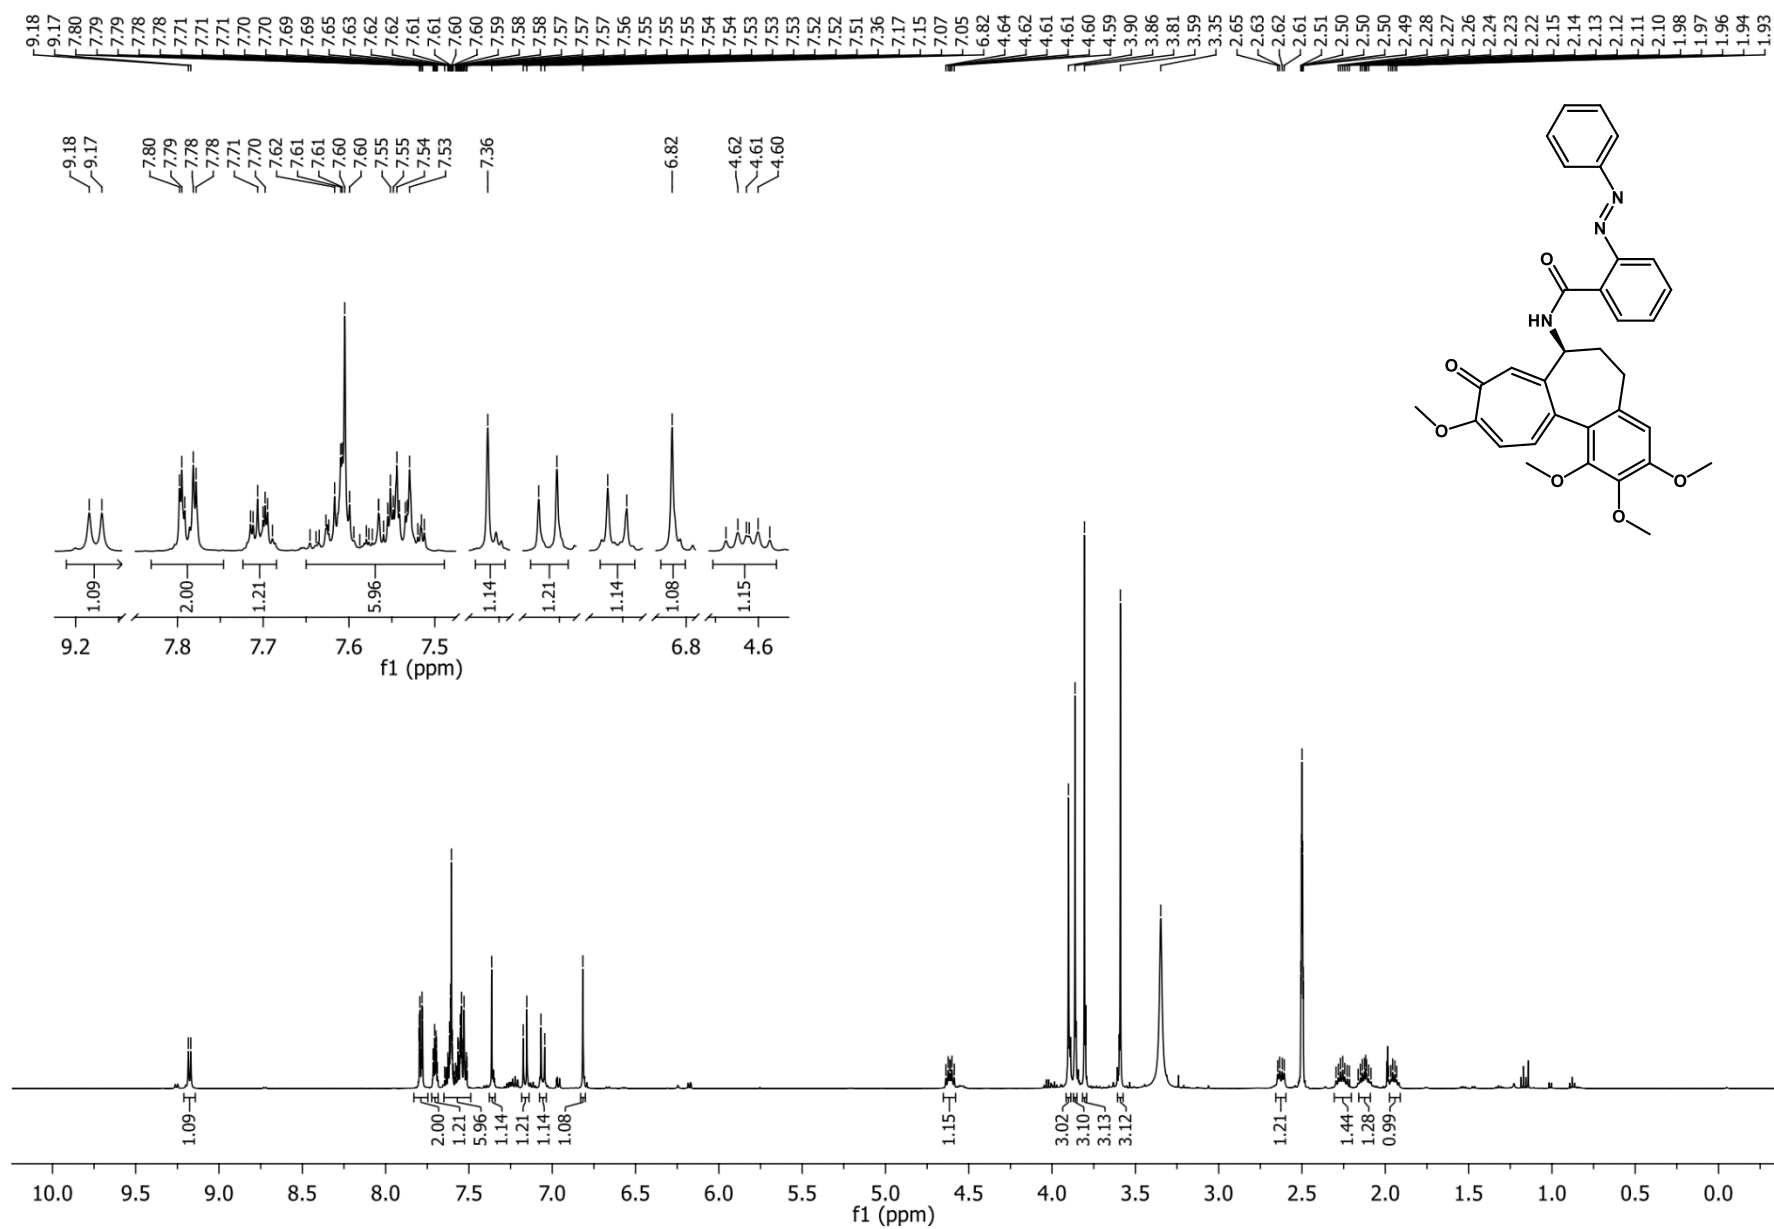

**Figure S68.**  $^1\text{H}$  NMR spectra of *o*-AzoCol ((*S,E*)-2-(phenyldiazenyl)-*N*-(1,2,3,10-tetramethoxy-9-oxo-5,6,7,9-tetrahydrobenzo[*a*]heptalen-7-yl)benzamide).

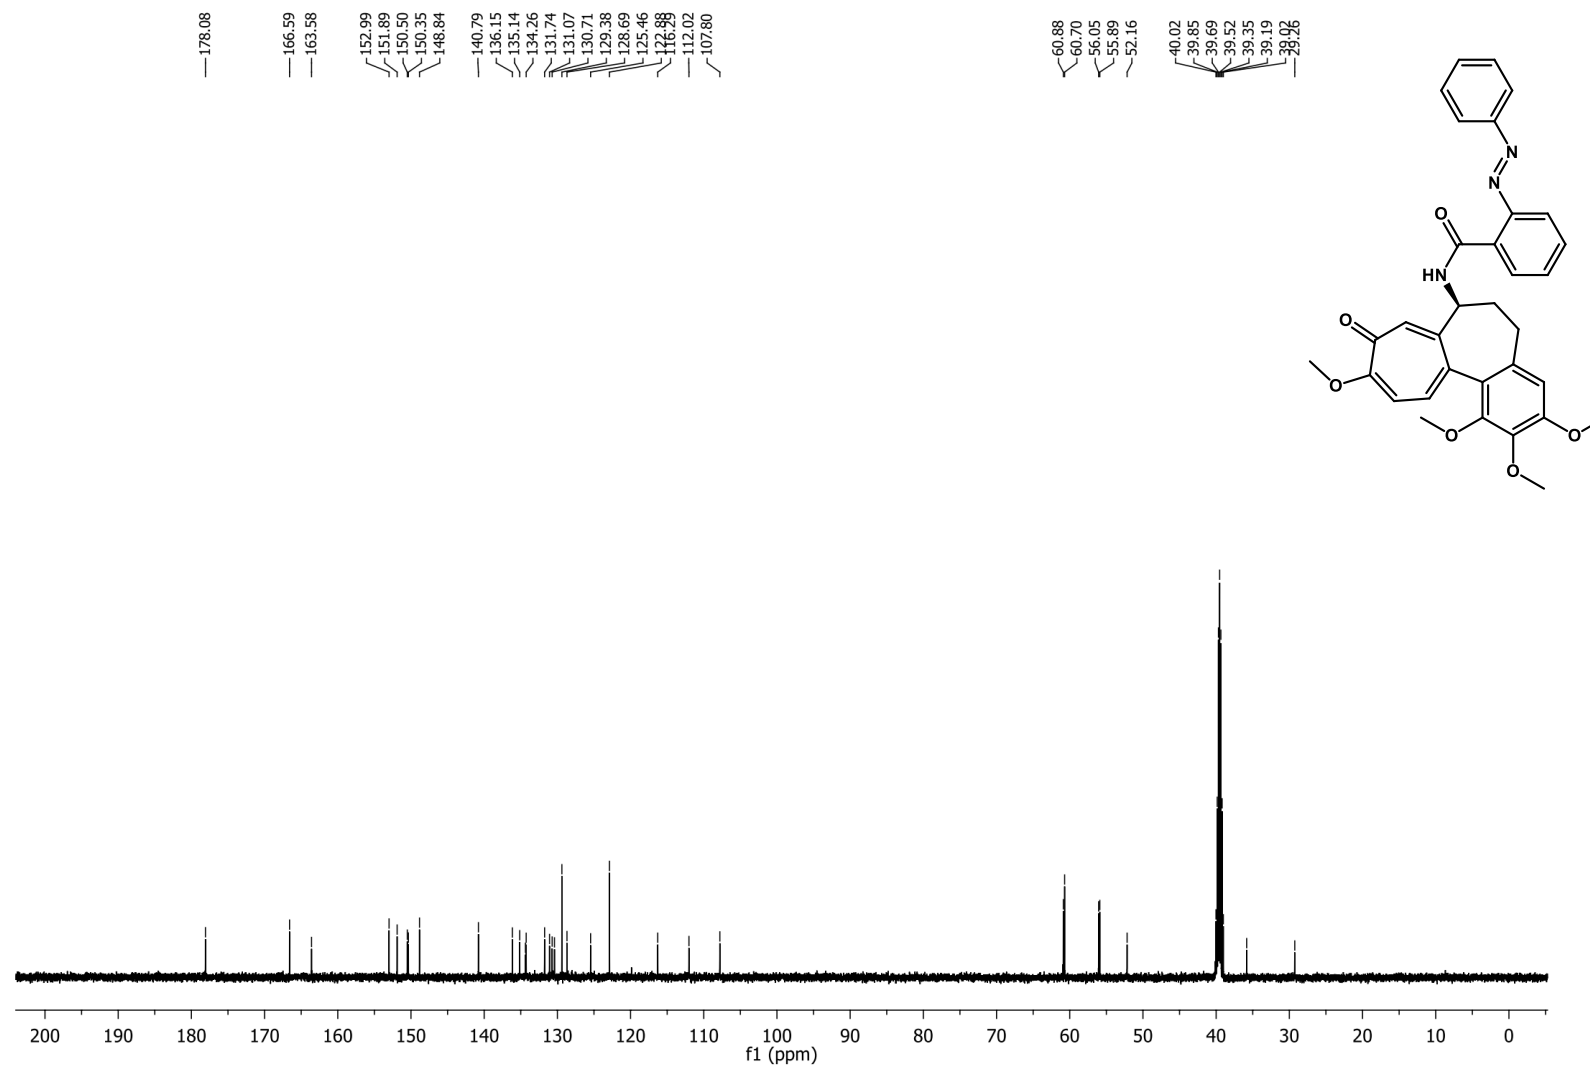

**Figure S69.** <sup>13</sup>C NMR spectra of *o*-AzoCol ((*S,E*)-2-(phenyldiazenyl)-*N*-(1,2,3,10-tetramethoxy-9-oxo-5,6,7,9-tetrahydrobenzo[*a*]heptalen-7-yl)benzamide).



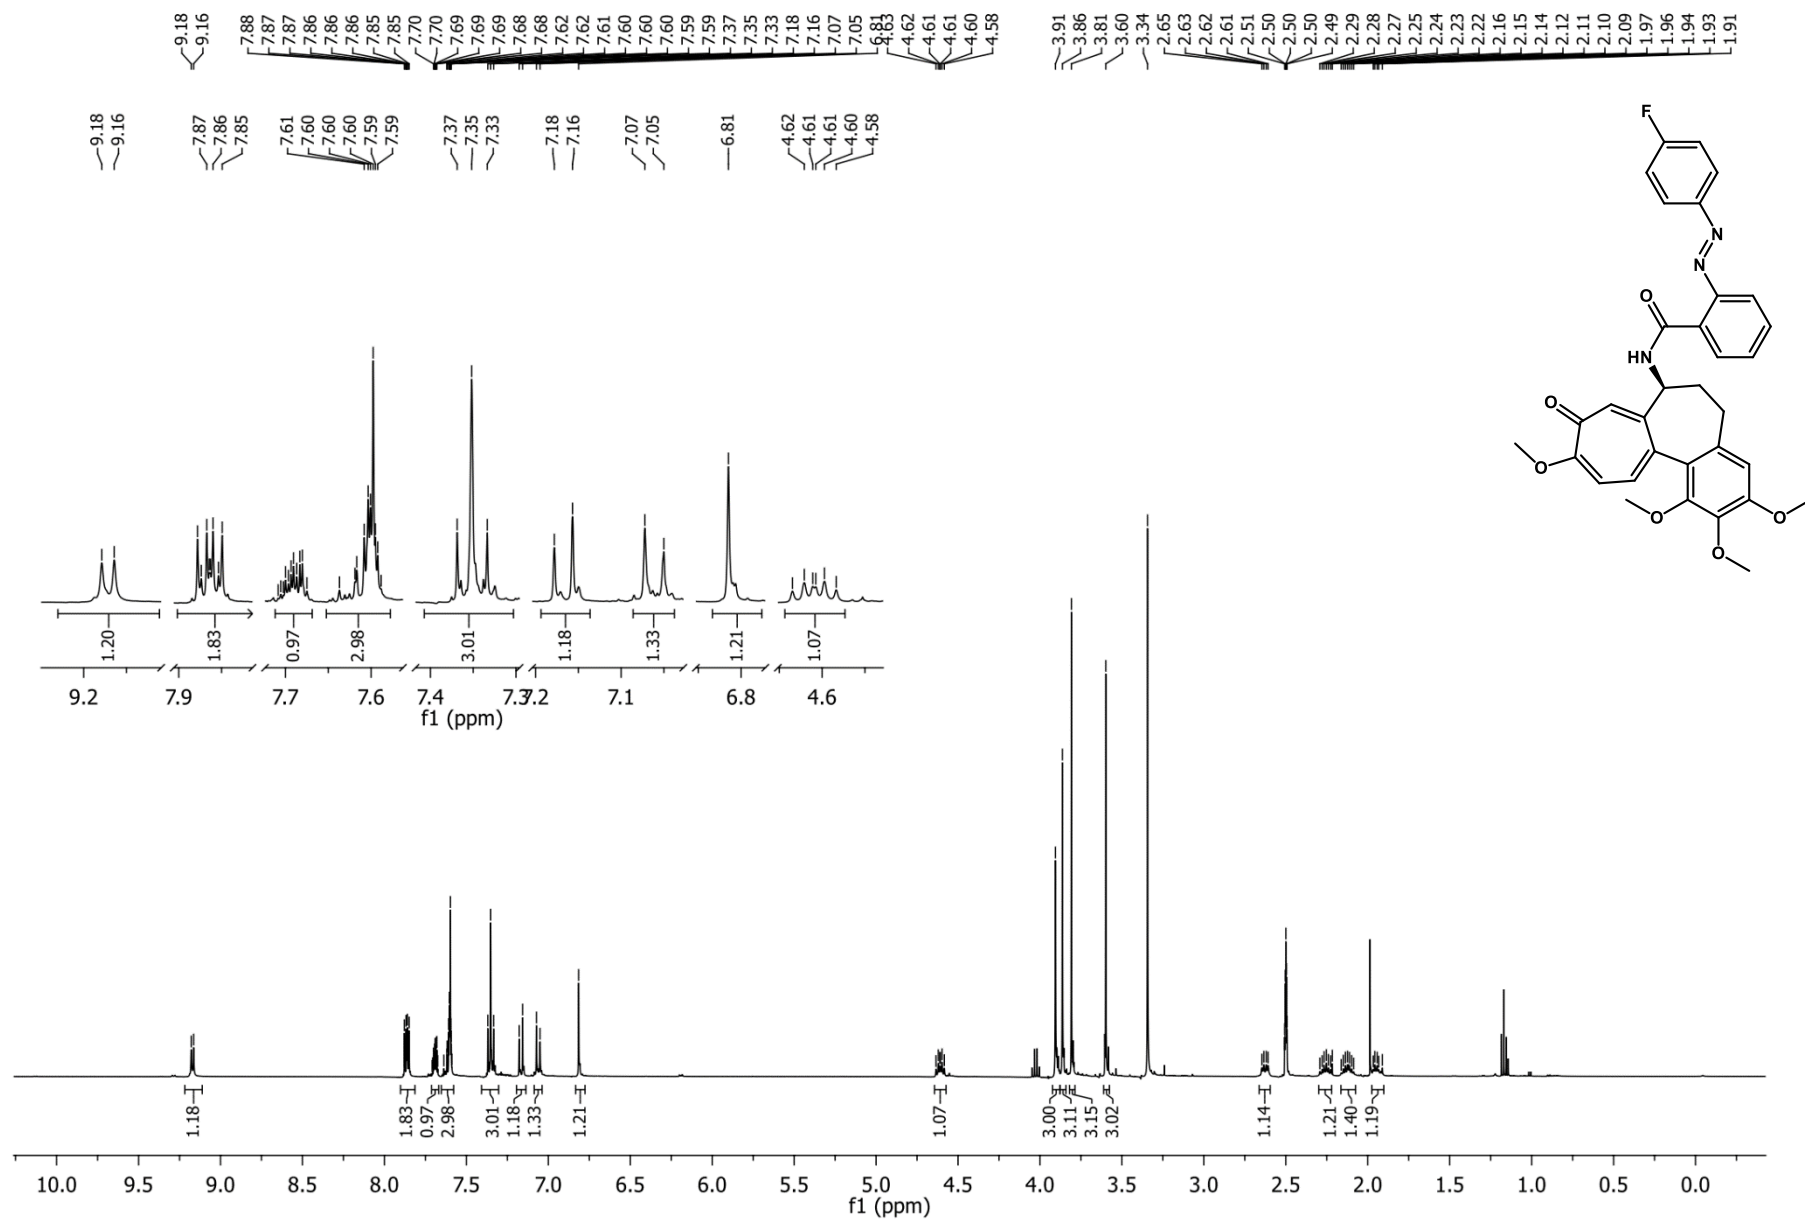

**Figure S70.**  $^1\text{H}$  NMR spectra of *o*-AzoCol4F (S,E)-2-((4-fluorophenyl)diazenyl)-N-(1,2,3,10-tetramethoxy-9-oxo-5,6,7,9-tetrahydrobenzo[a]heptalen-7-yl)benzamide).

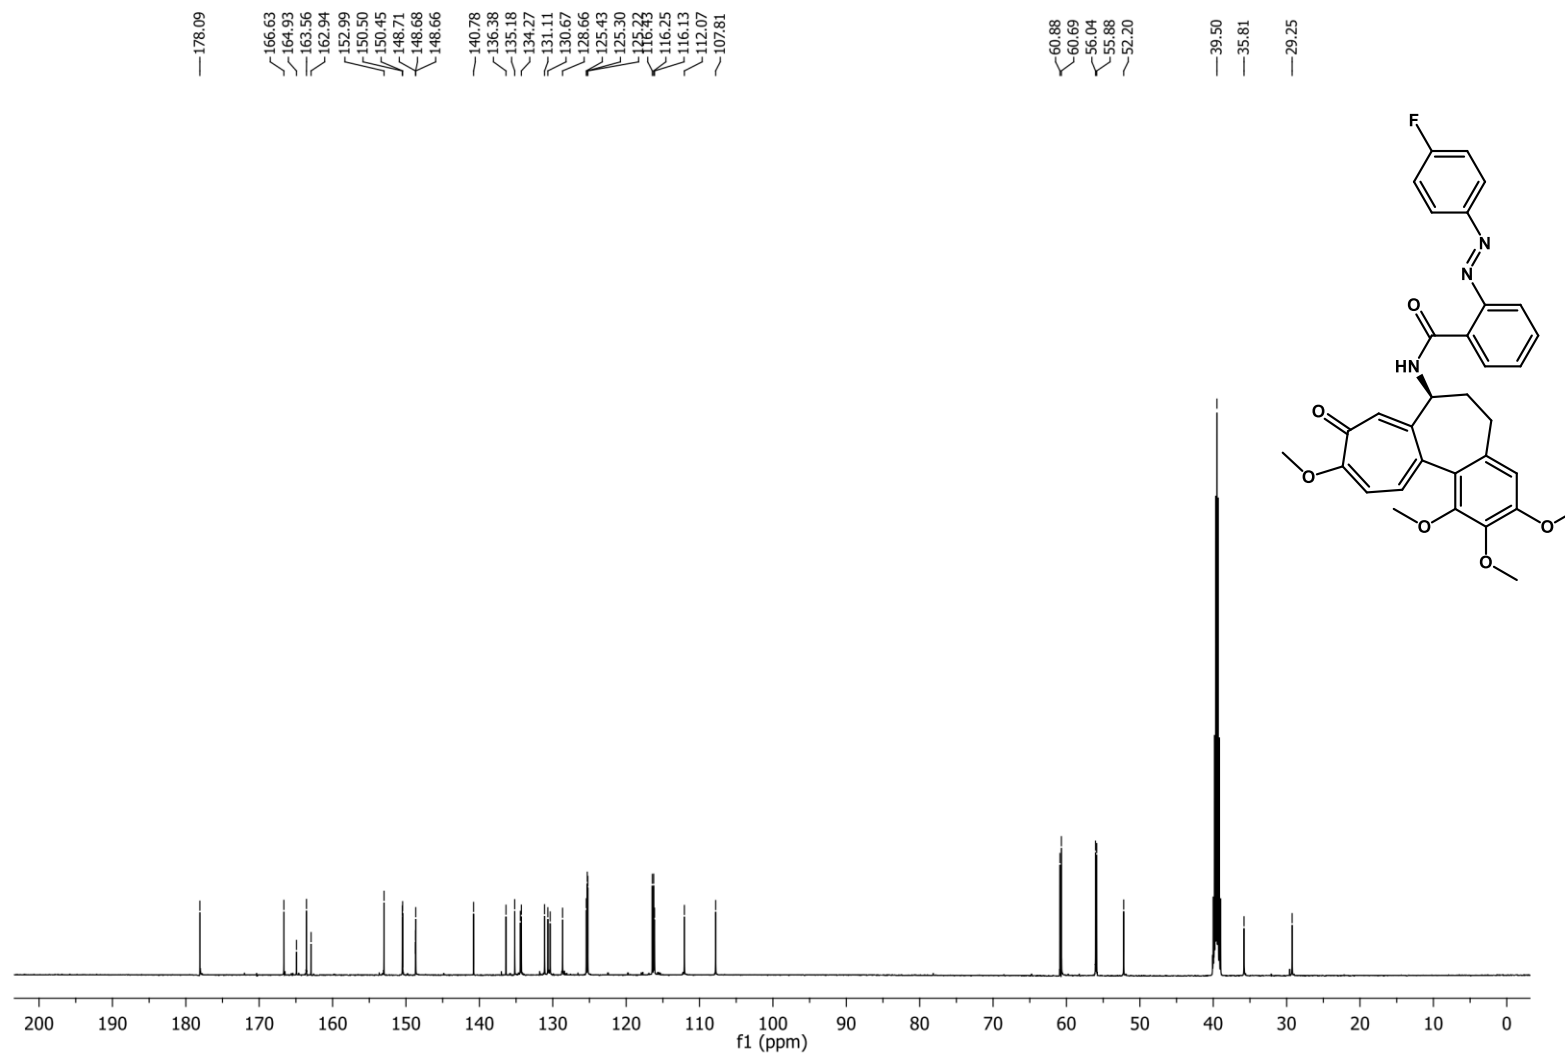

**Figure S71.**  $^{13}\text{C}$  NMR spectra of *o*-AzoCol4F (S,E)-2-((4-fluorophenyl)diazenyl)-N-(1,2,3,10-tetramethoxy-9-oxo-5,6,7,9-tetrahydrobenzo[a]heptalen-7-yl)benzamide).

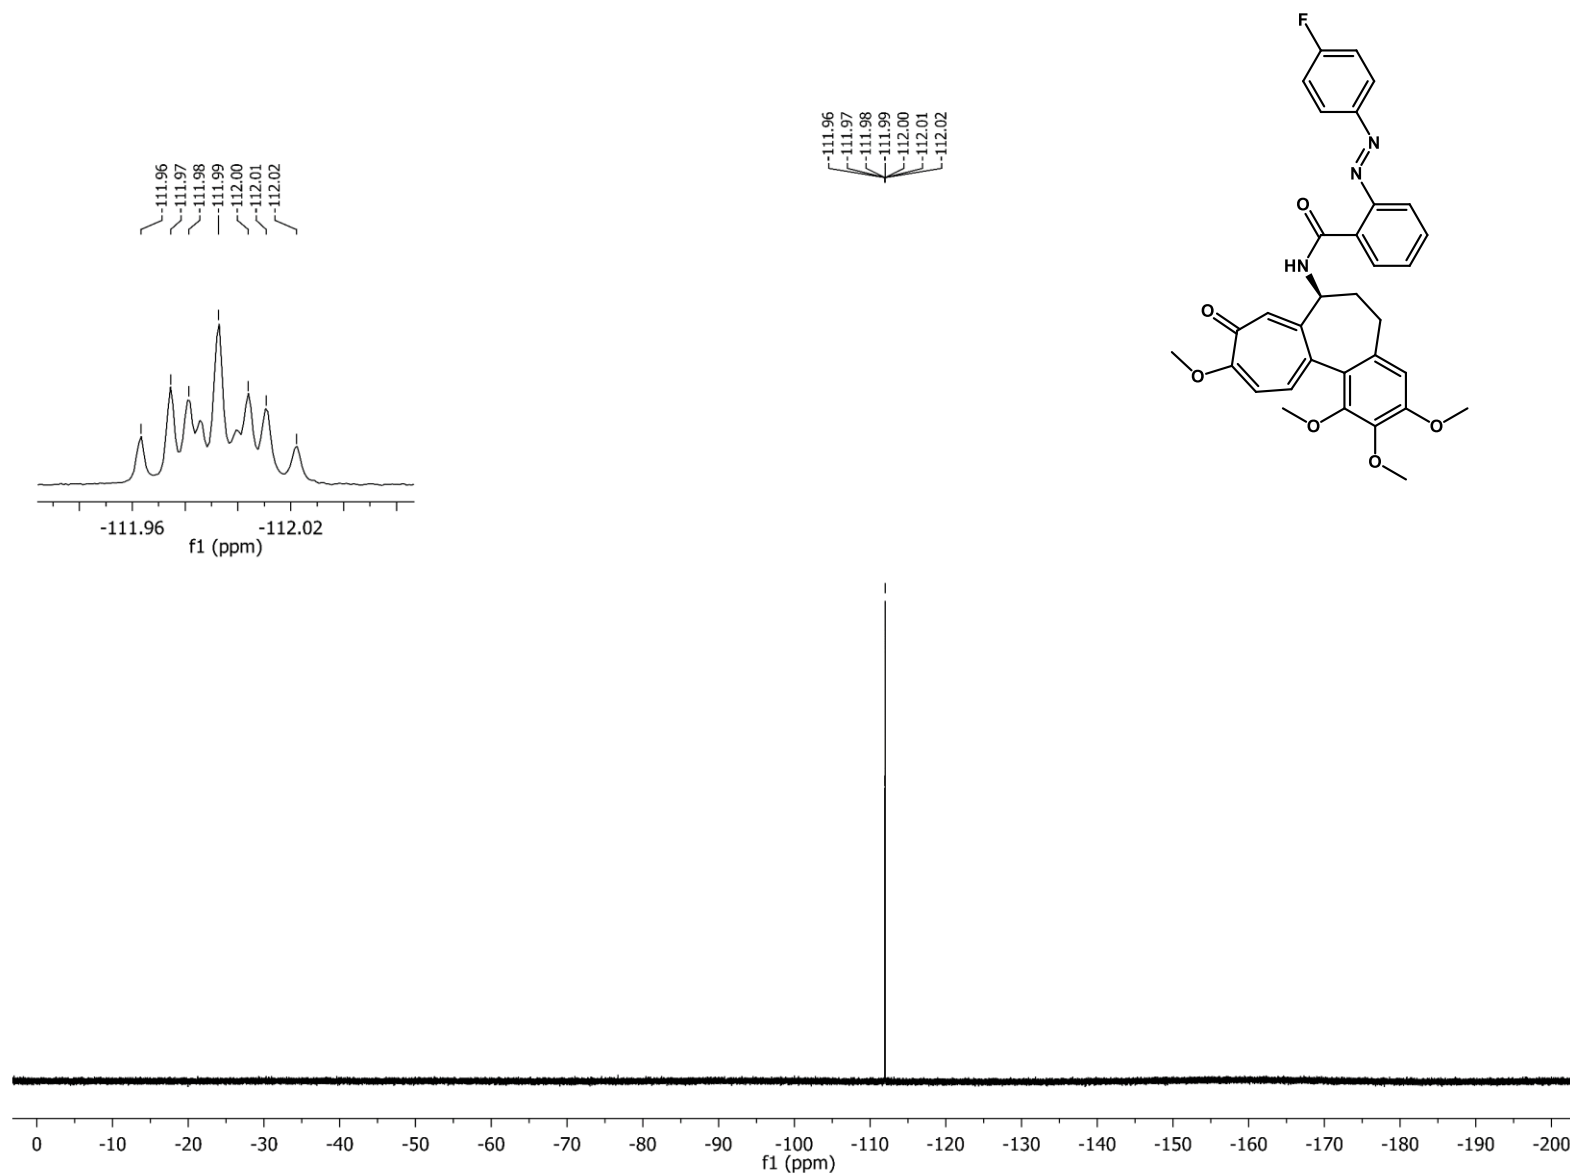

**Figure S72.**  $^{19}\text{F}$  NMR spectra of *o*-AzoCol4F (S,E)-2-((4-fluorophenyl)diazenyl)-N-(1,2,3,10-tetramethoxy-9-oxo-5,6,7,9-tetrahydrobenzo[a]heptalen-7-yl)benzamide).

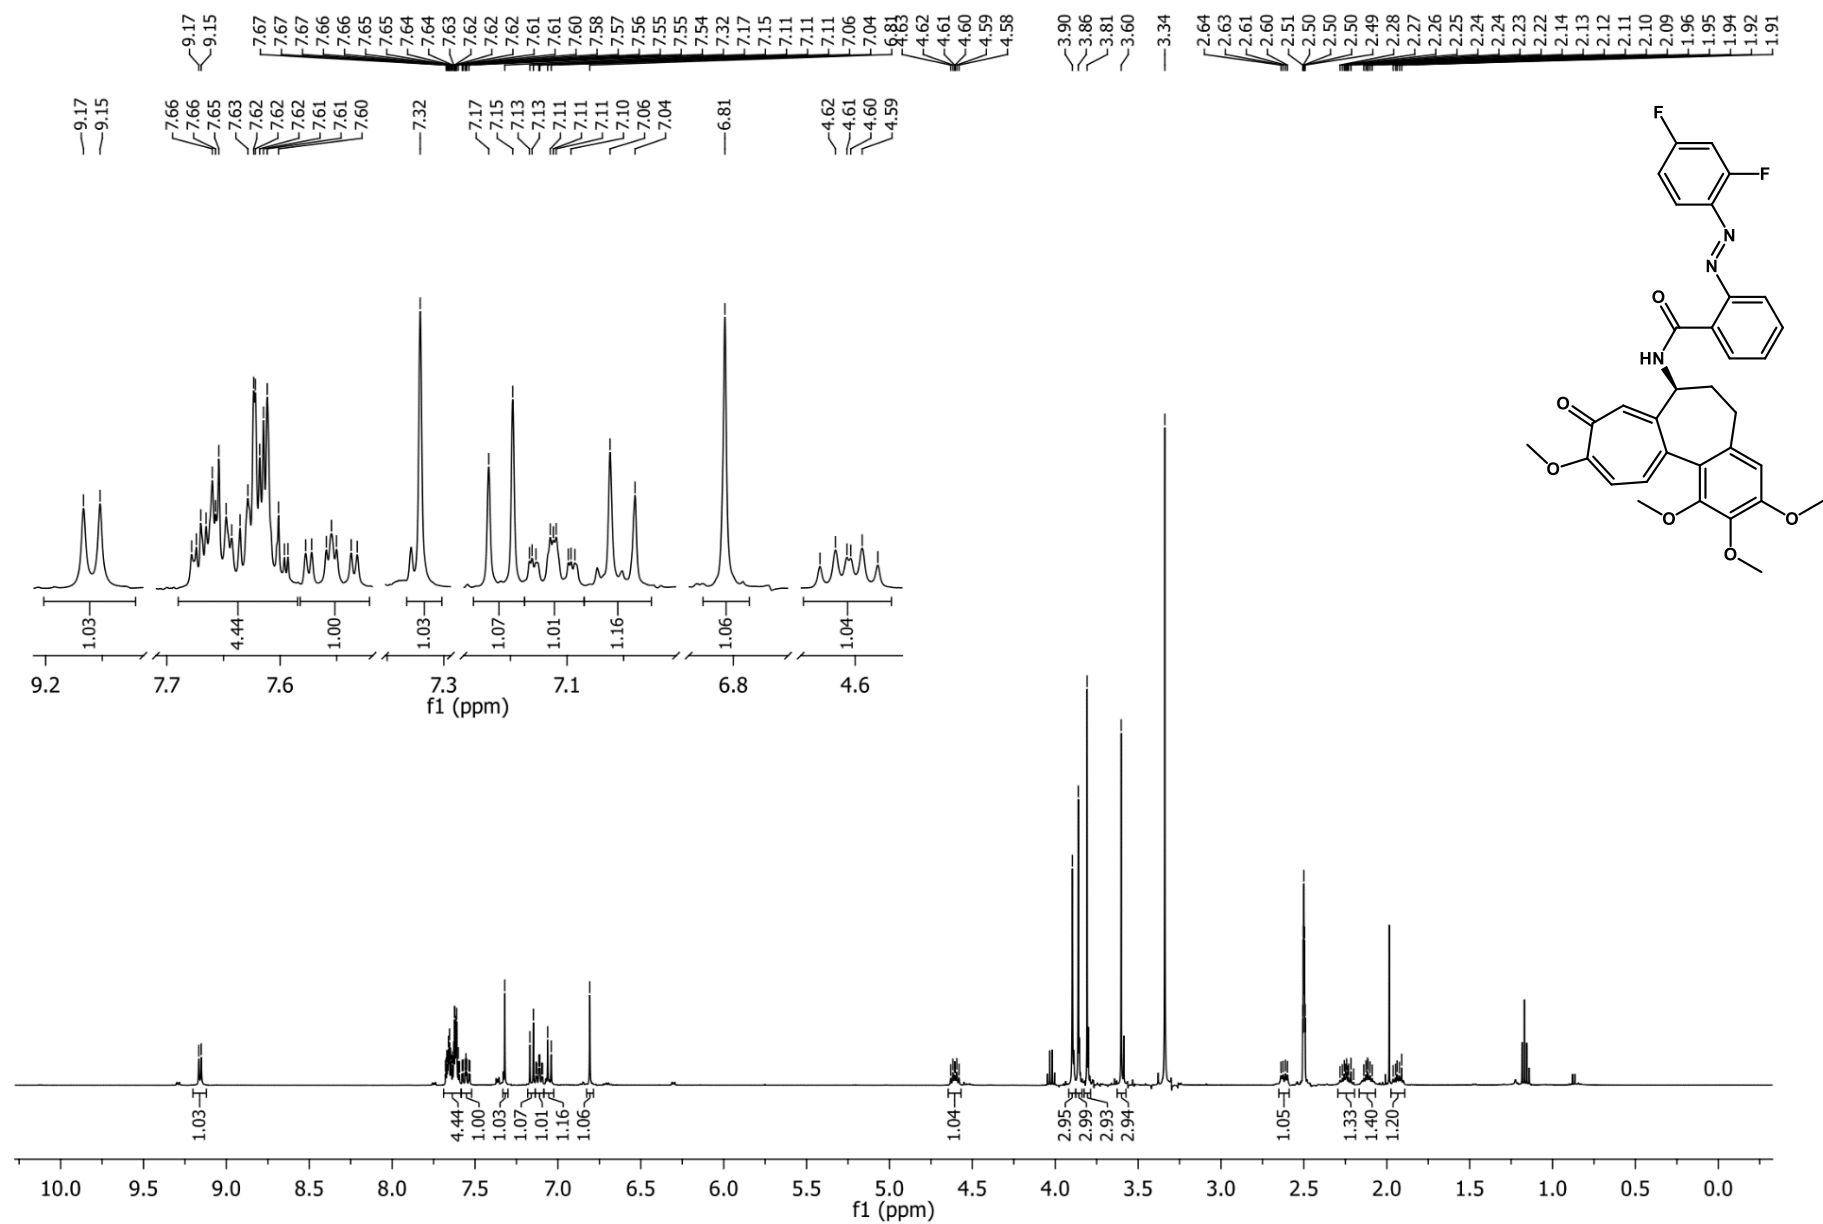

**Figure S73.**  $^1\text{H}$  NMR spectra of *o*-AzoCol24DF ((*S,E*)-2-((2,4-difluorophenyl)diazenyl)-*N*-(1,2,3,10-tetramethoxy-9-oxo-5,6,7,9-tetrahydrobenzo[*a*]heptalen-7-yl)benzamide).

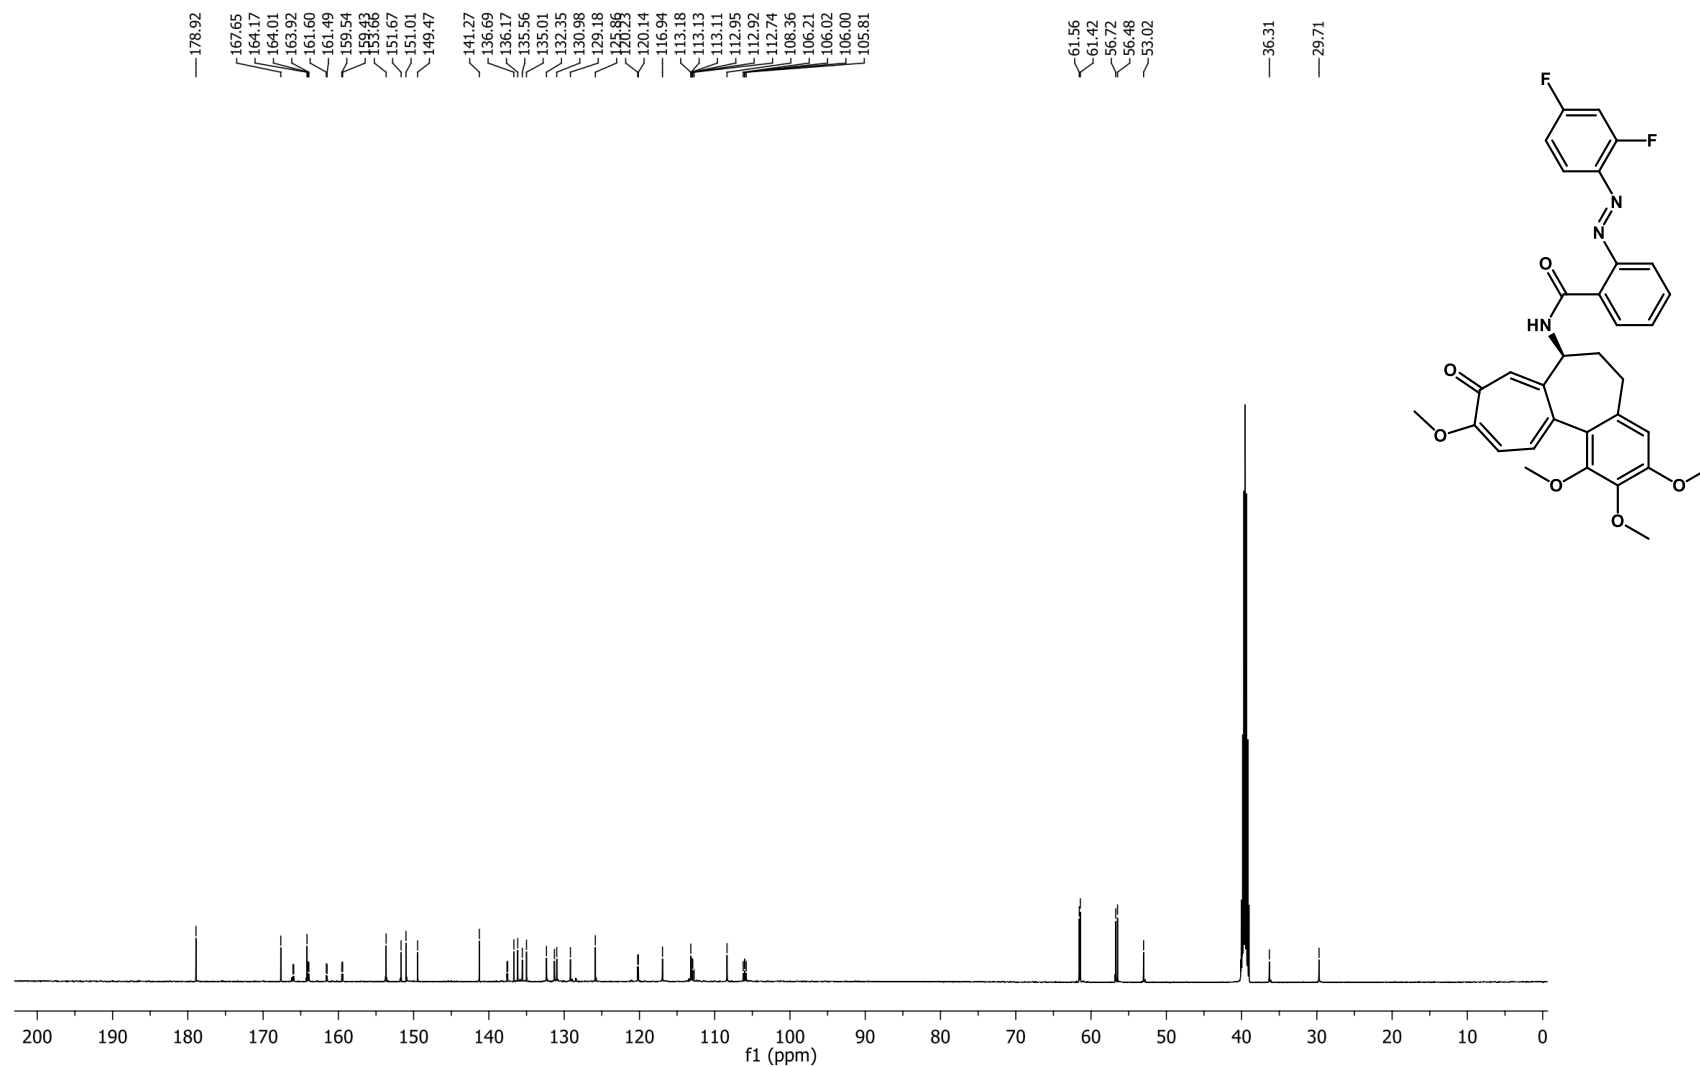

**Figure S74.** <sup>13</sup>C NMR spectra of *o*-**AzoCol24DF** ((*S,E*)-2-((2,4-difluorophenyl)diazenyl)-*N*-(1,2,3,10-tetramethoxy-9-oxo-5,6,7,9-tetrahydrobenzo[*a*]heptalen-7-yl)benzamide).

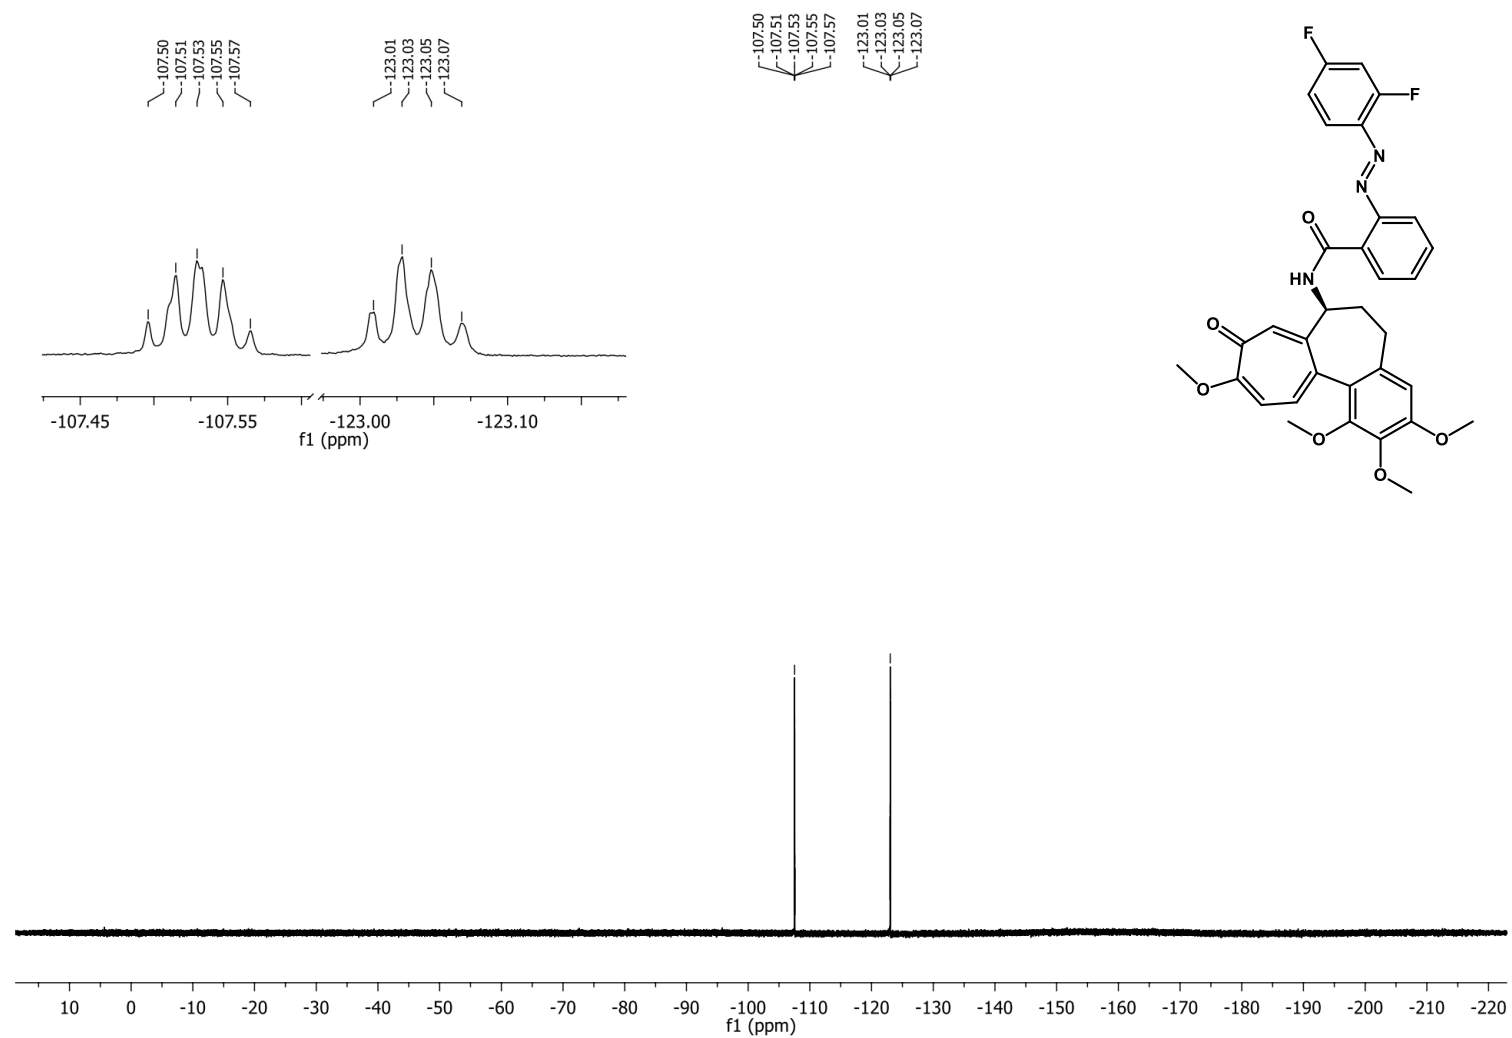

**Figure S75.**  $^{19}\text{F}$  NMR spectra of *o*-AzoCol24DF ((S,E)-2-((2,4-difluorophenyl)diazenyl)-N-(1,2,3,10-tetramethoxy-9-oxo-5,6,7,9-tetrahydrobenzo[a]heptalen-7-yl)benzamide).

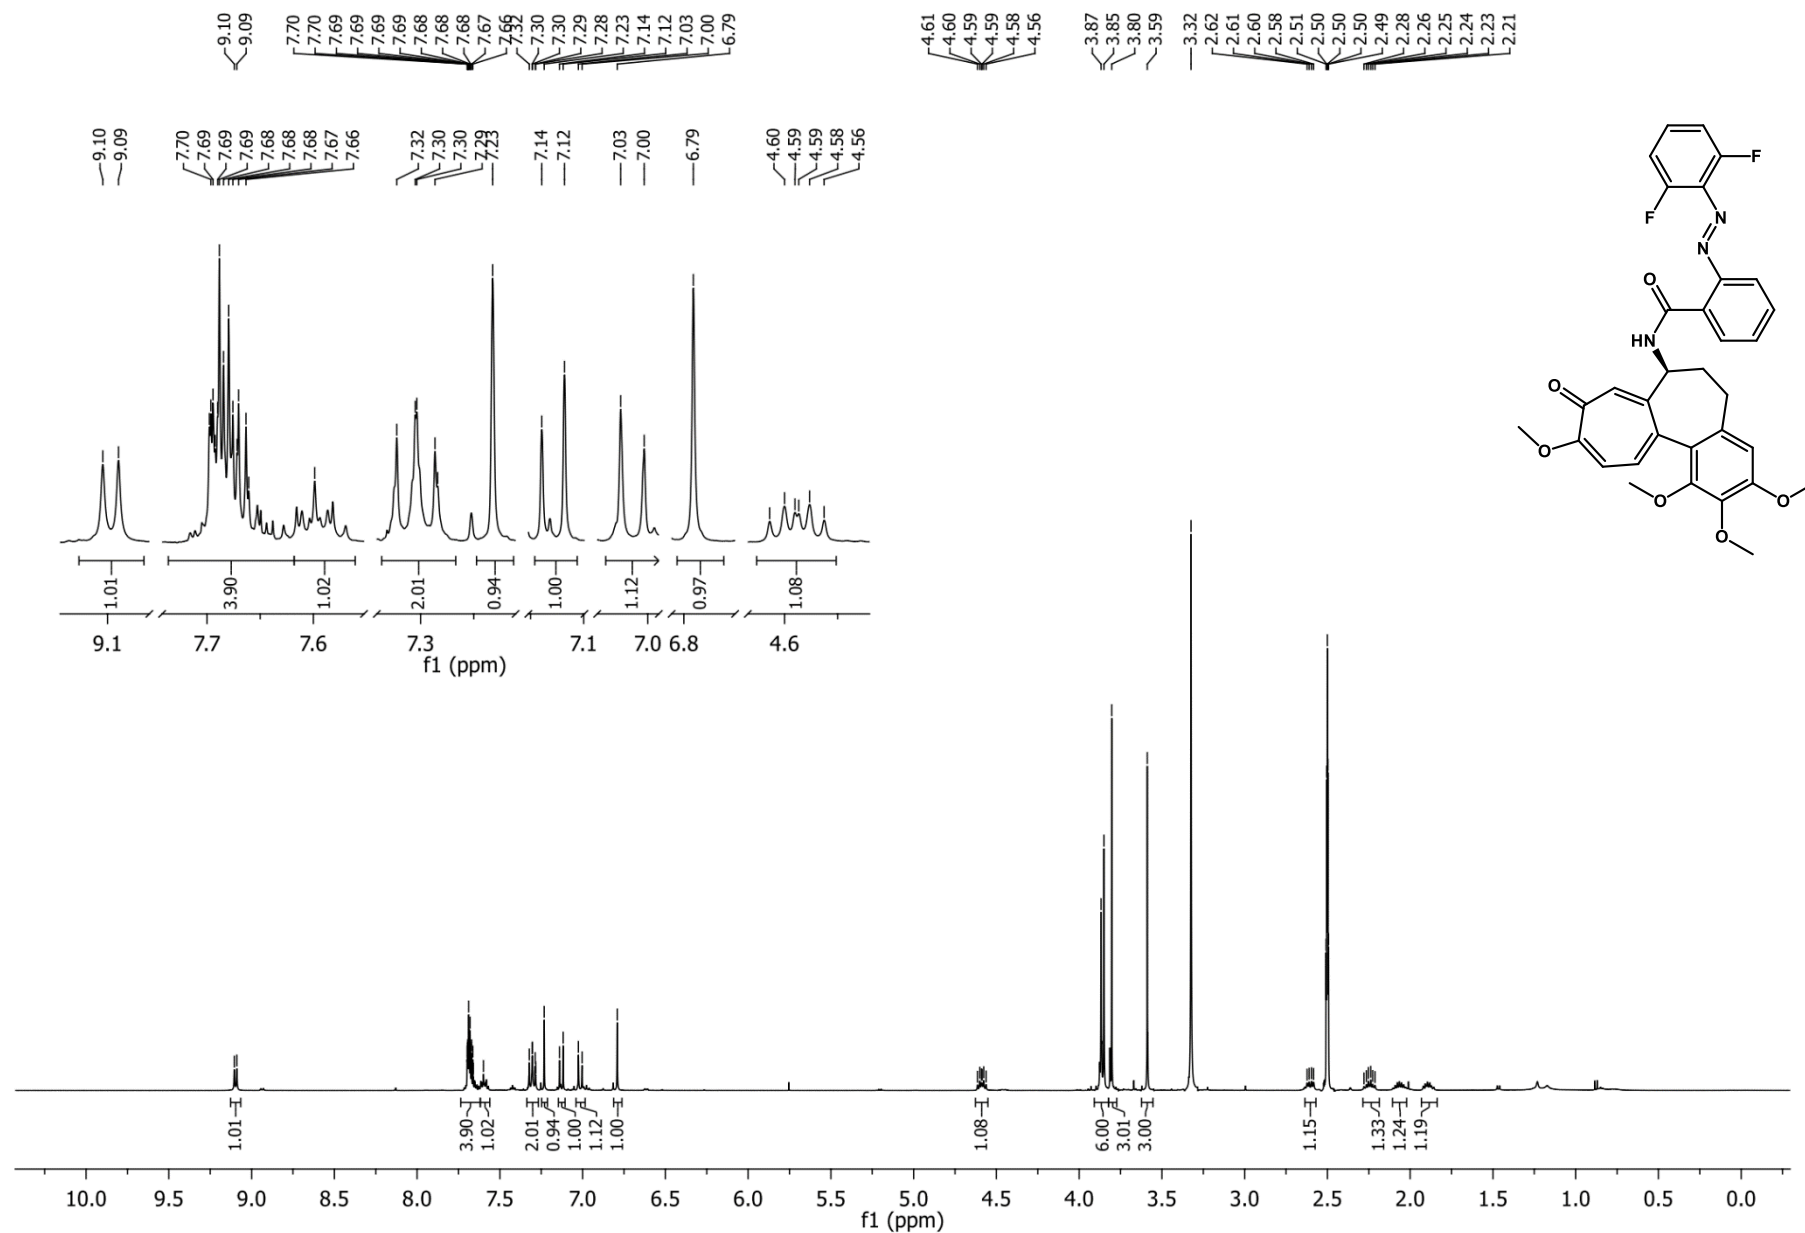

**Figure S76.**  $^1\text{H}$  NMR spectra of *o*-AzoCol26DF (S,E)-2-((2,6-difluorophenyl)diazenyl)-N-(1,2,3,10-tetramethoxy-9-oxo-5,6,7,9-tetrahydrobenzo[a]heptalen-7-yl)benzamide).

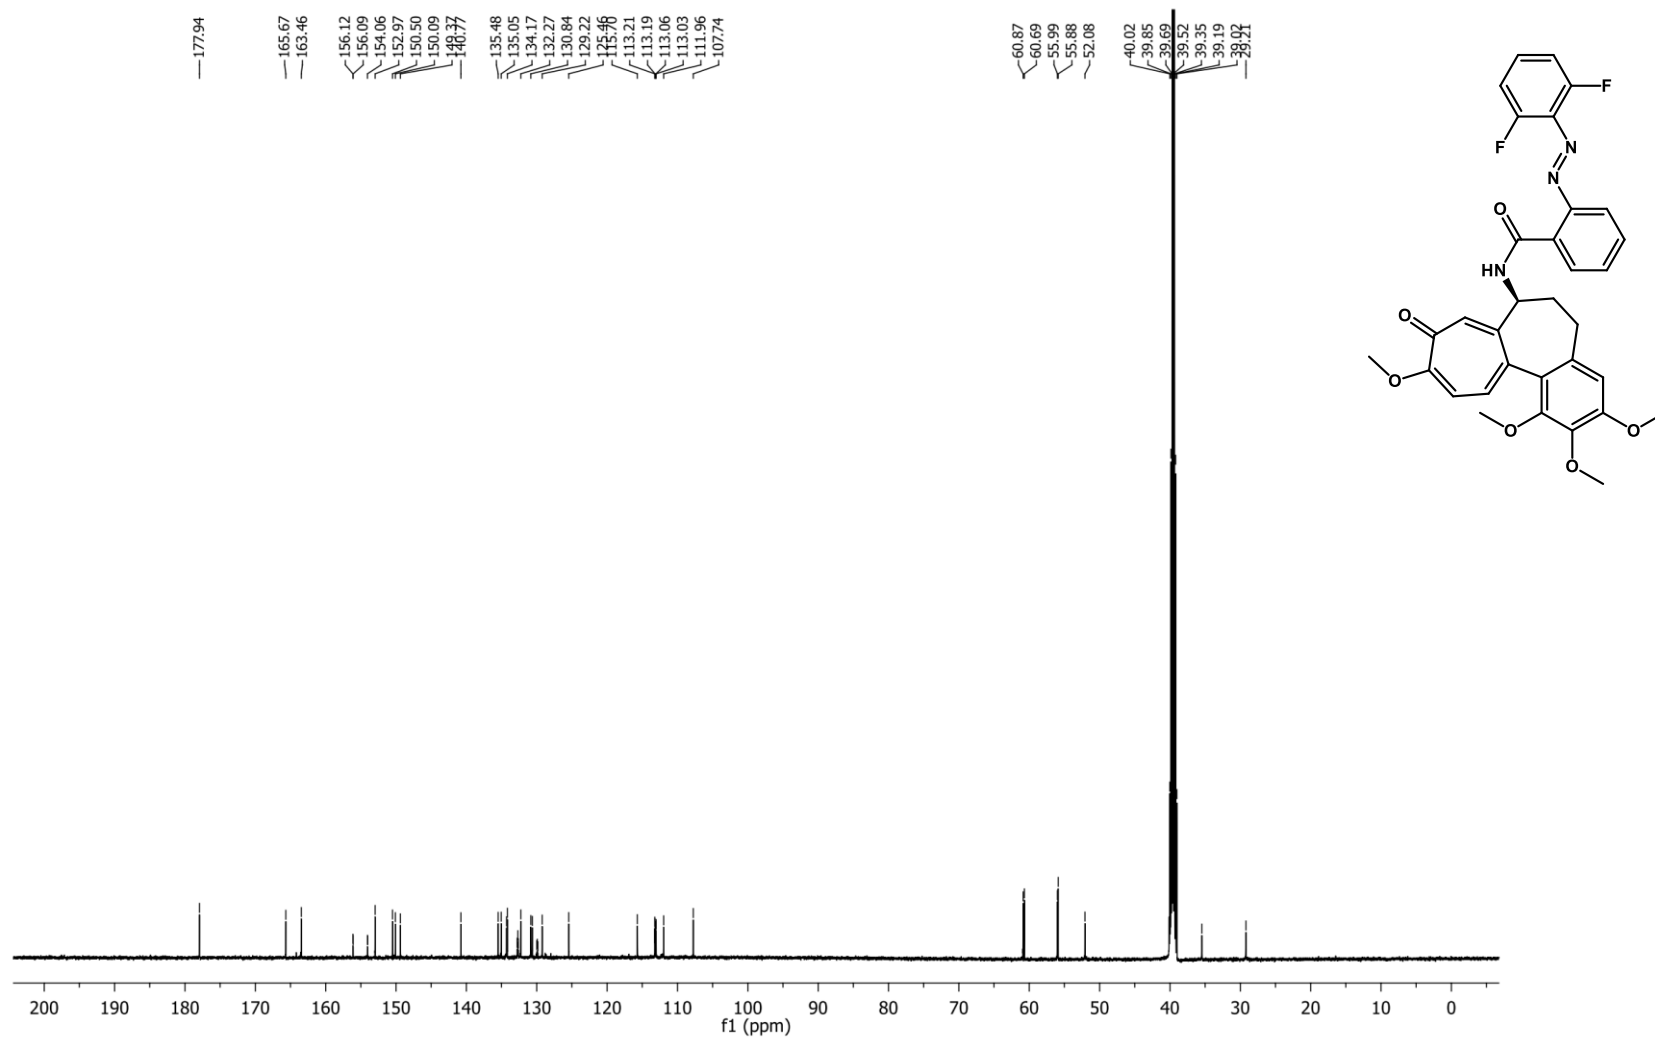

**Figure S77.** <sup>13</sup>C NMR spectra of *o*-AzoCol26DF (S,E)-2-((2,6-difluorophenyl)diazenyl)-N-(1,2,3,10-tetramethoxy-9-oxo-5,6,7,9-tetrahydrobenzo[a]heptalen-7-yl)benzamide).



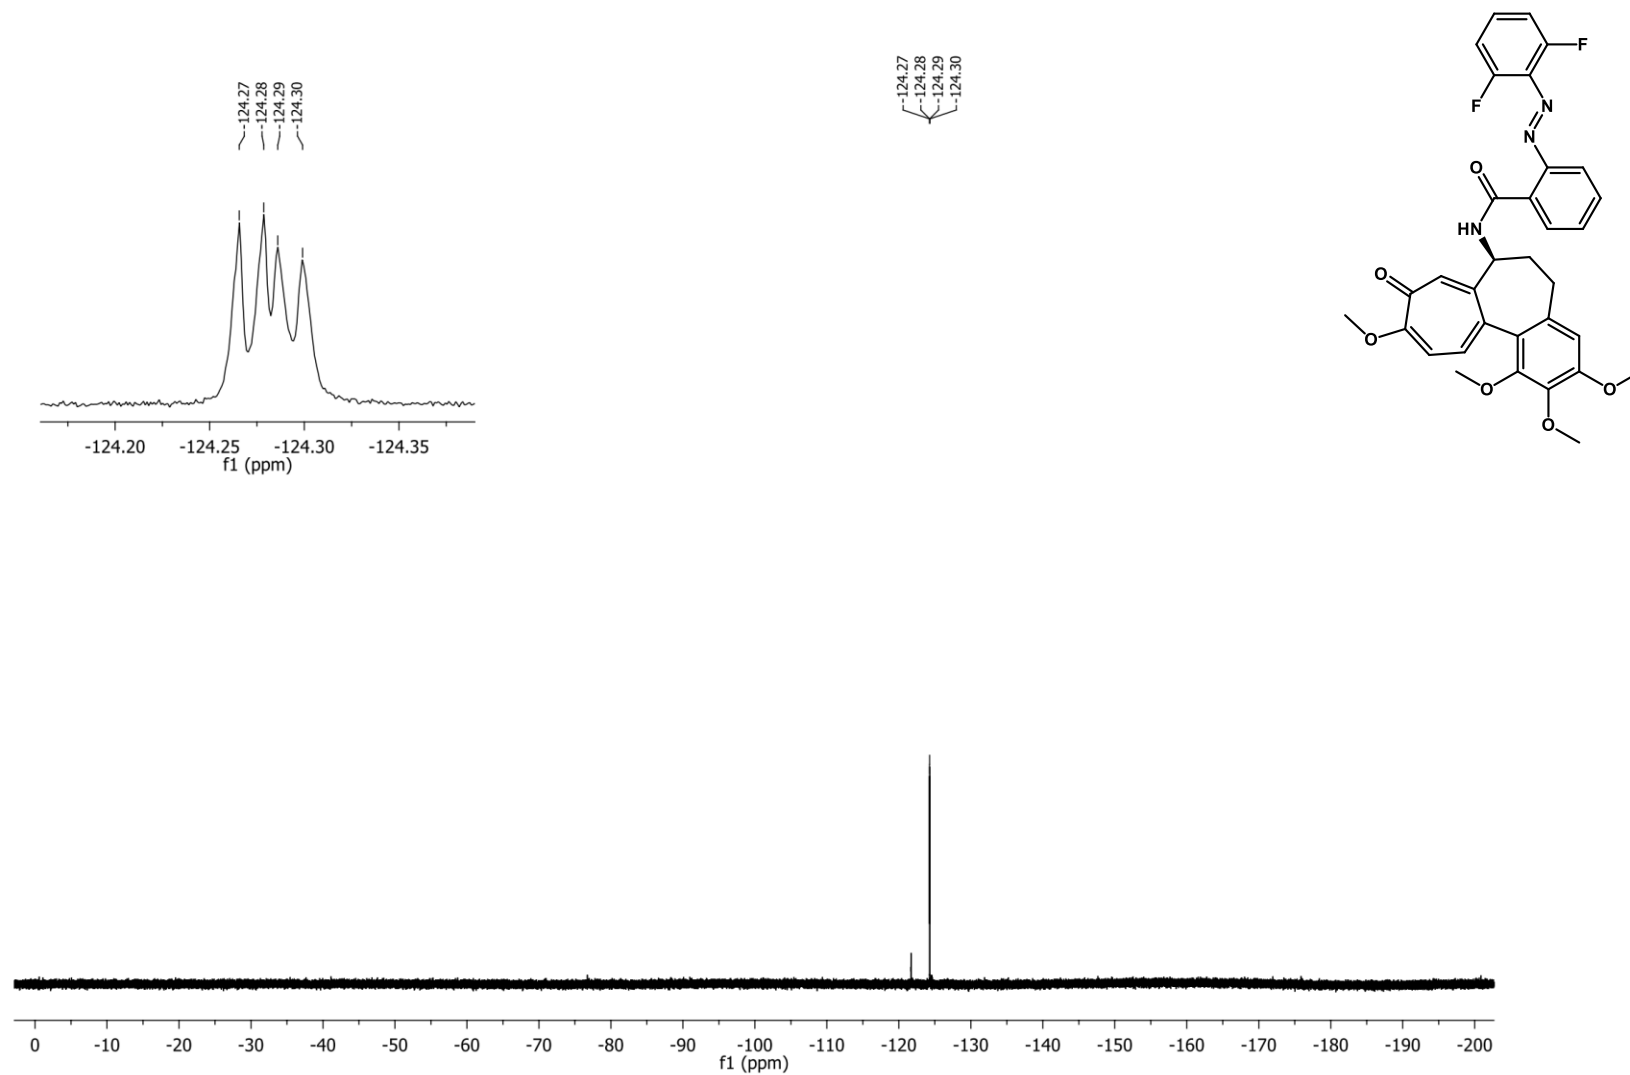

**Figure S78.**  $^{19}\text{F}$  NMR spectra of *o*-AzoCol26DF (S,E)-2-((2,6-difluorophenyl)diazenyl)-N-(1,2,3,10-tetramethoxy-9-oxo-5,6,7,9-tetrahydrobenzo[a]heptalen-7-yl)benzamide).

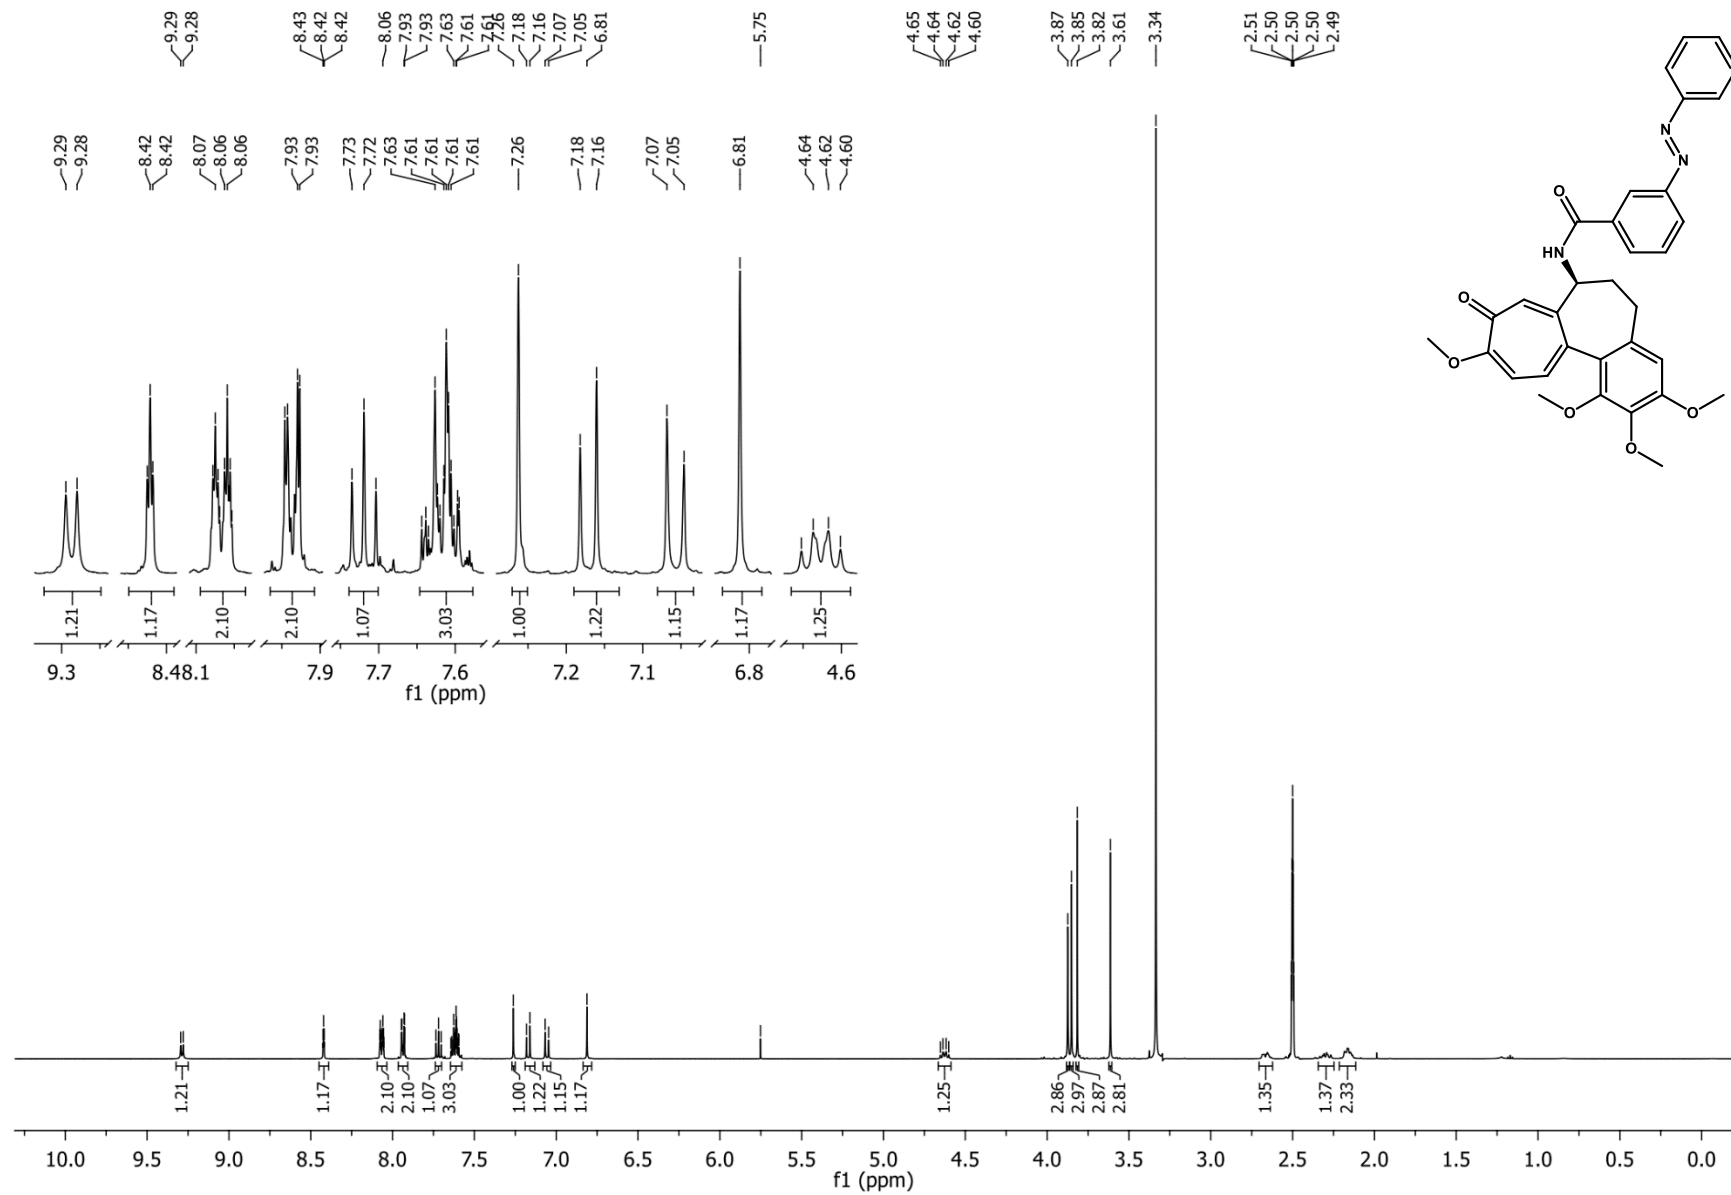

**Figure S79.**  $^1\text{H}$  NMR spectra of *m*-AzoCol ((S,E)-3-(phenyldiazenyl)-N-(1,2,3,10-tetramethoxy-9-oxo-5,6,7,9-tetrahydrobenzo[a]heptalen-7-yl)benzamide).

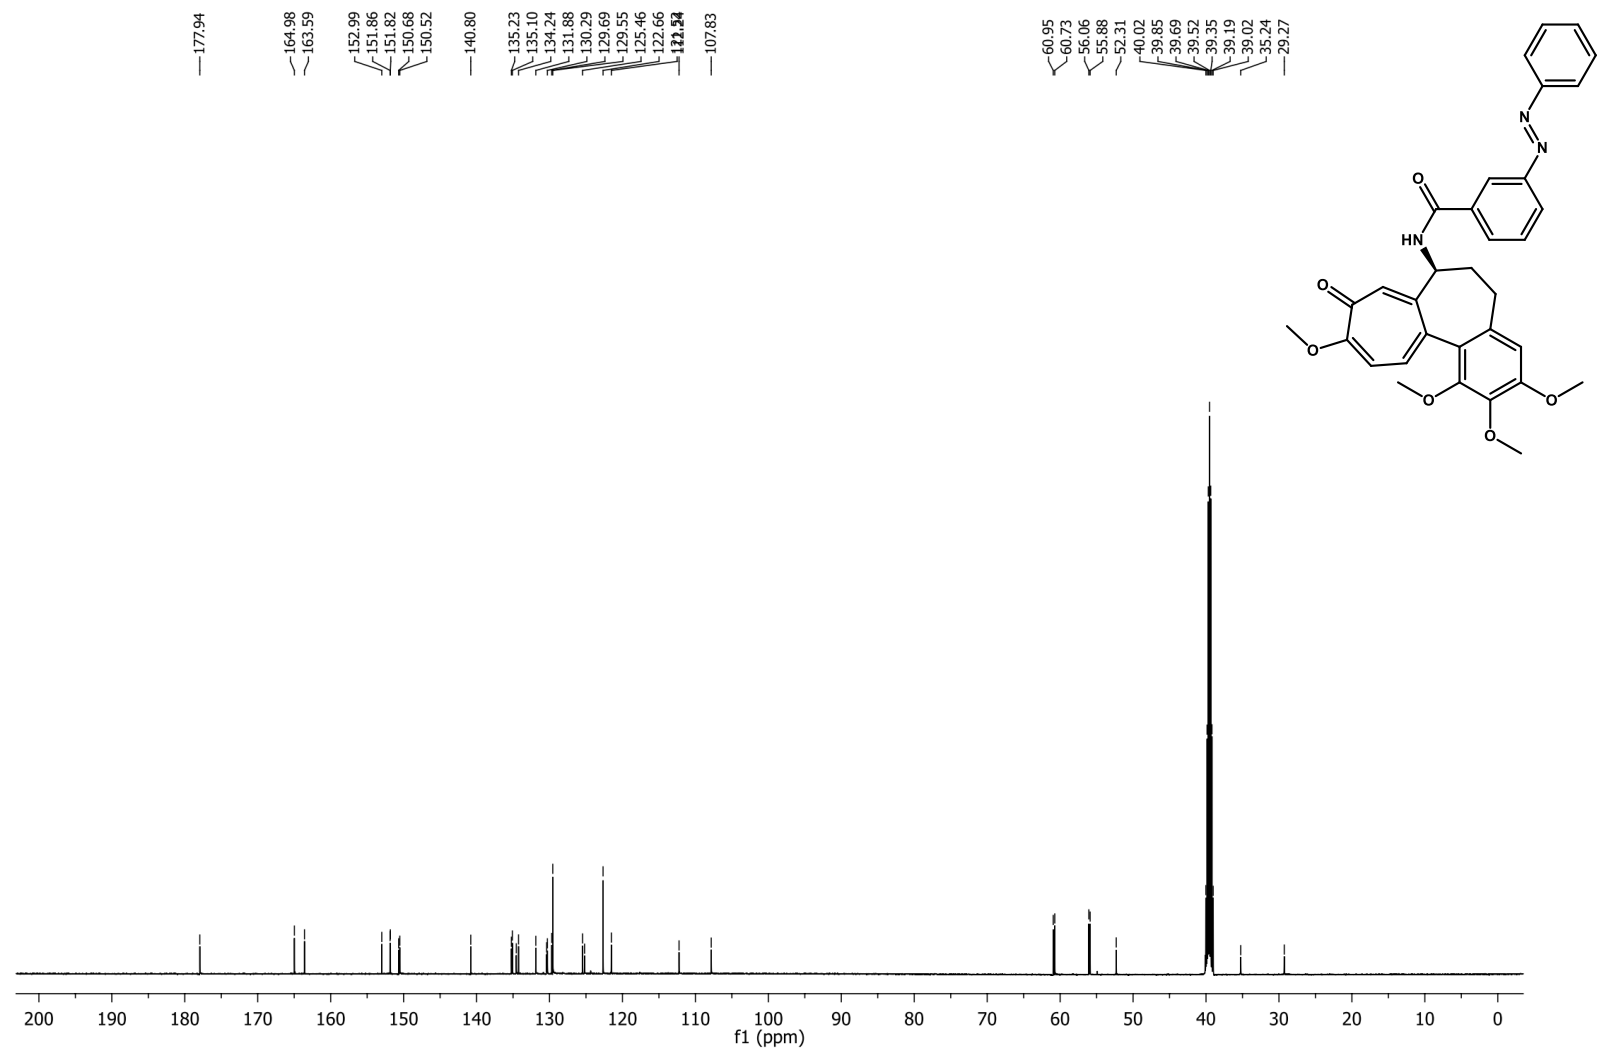

**Figure S80.**  $^{13}\text{C}$  NMR spectra of *m*-AzoCol ((S,E)-3-(phenyldiazenyl)-N-(1,2,3,10-tetramethoxy-9-oxo-5,6,7,9-tetrahydrobenzo[a]heptalen-7-yl)benzamide).

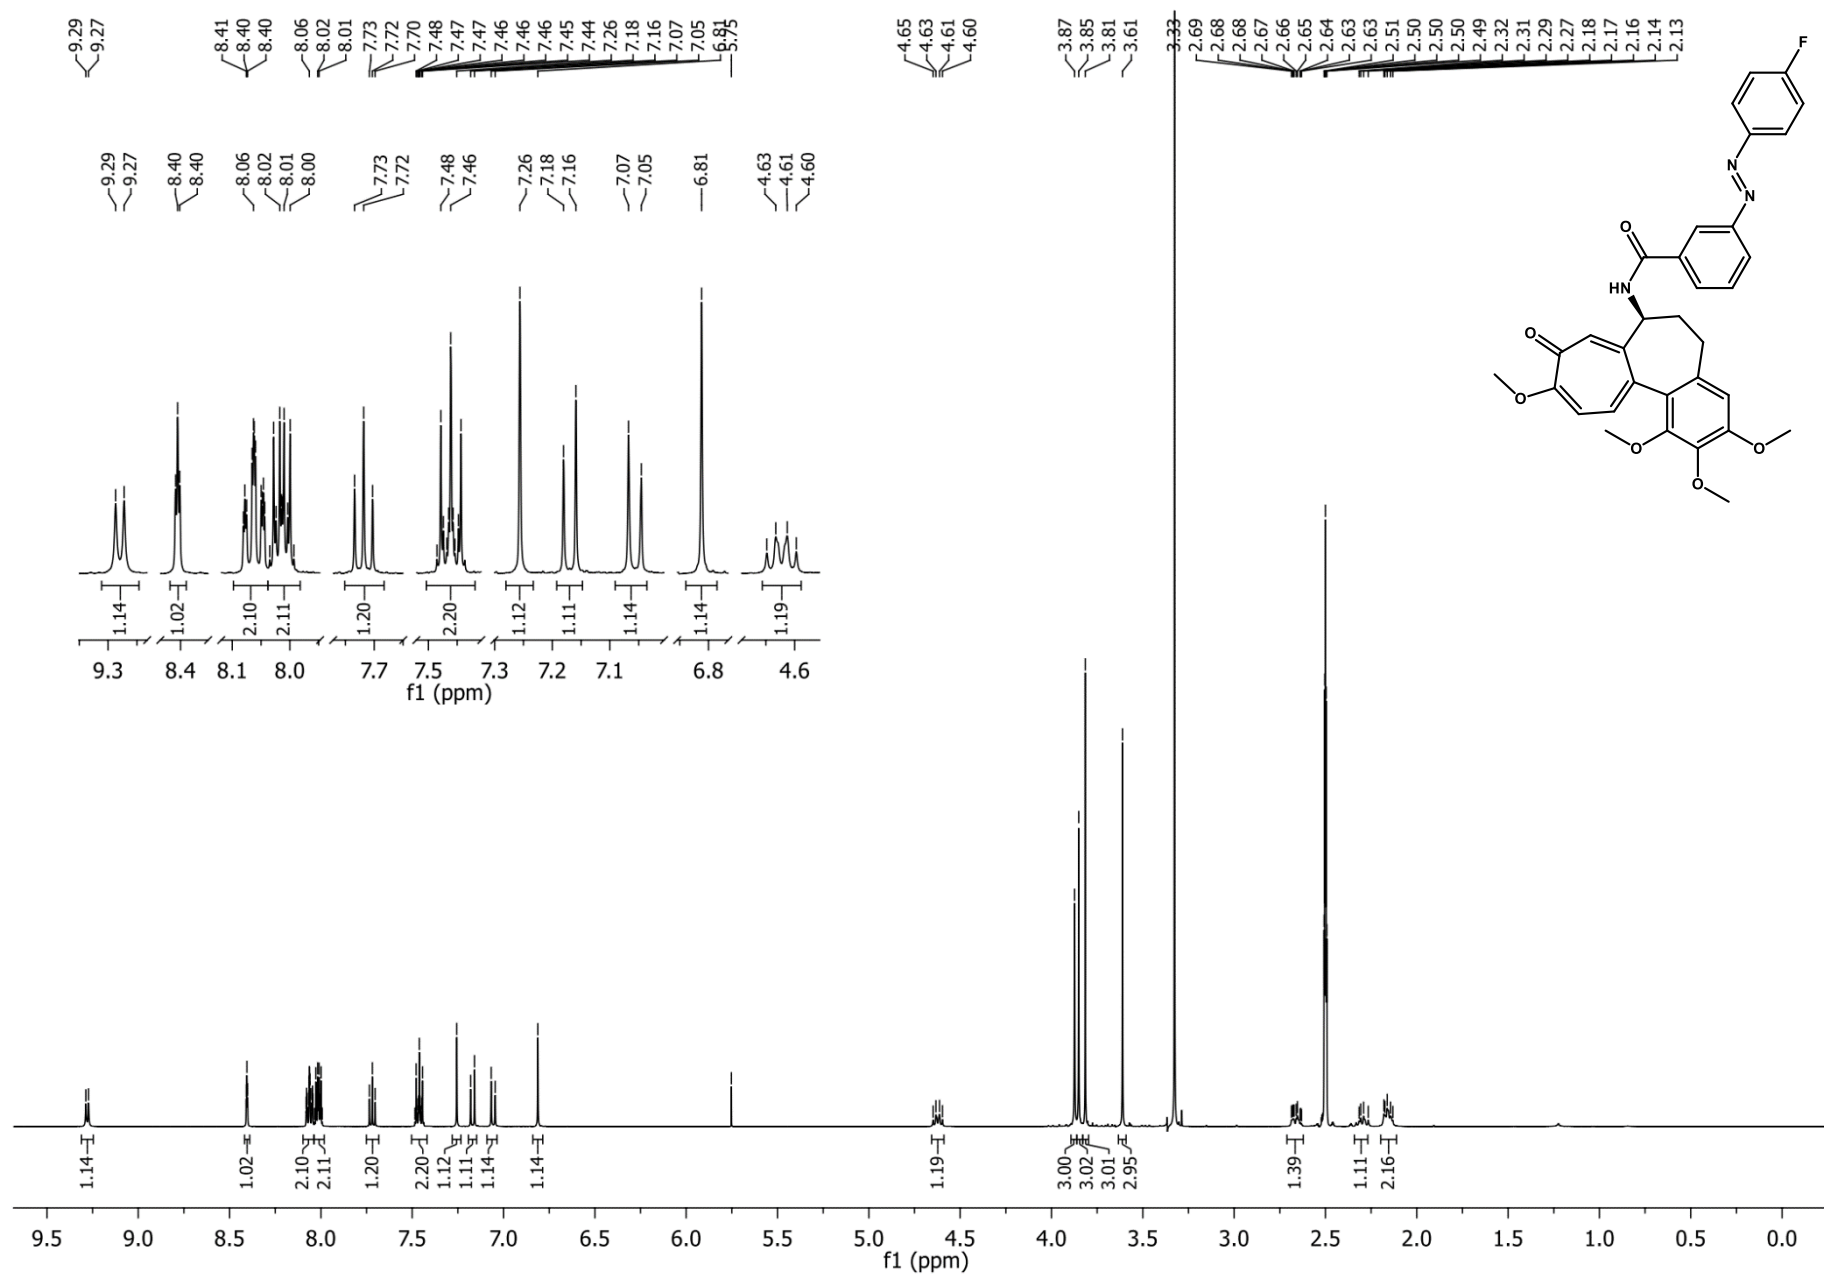

**Figure S81.** <sup>1</sup>H NMR spectra of *m*-AzoCol4F ((S,E)-3-((4-fluorophenyl)diazeryl)-N-(1,2,3,10-tetramethoxy-9-oxo-5,6,7,9-tetrahydrobenzo[a]heptalen-7-yl)benzamide).

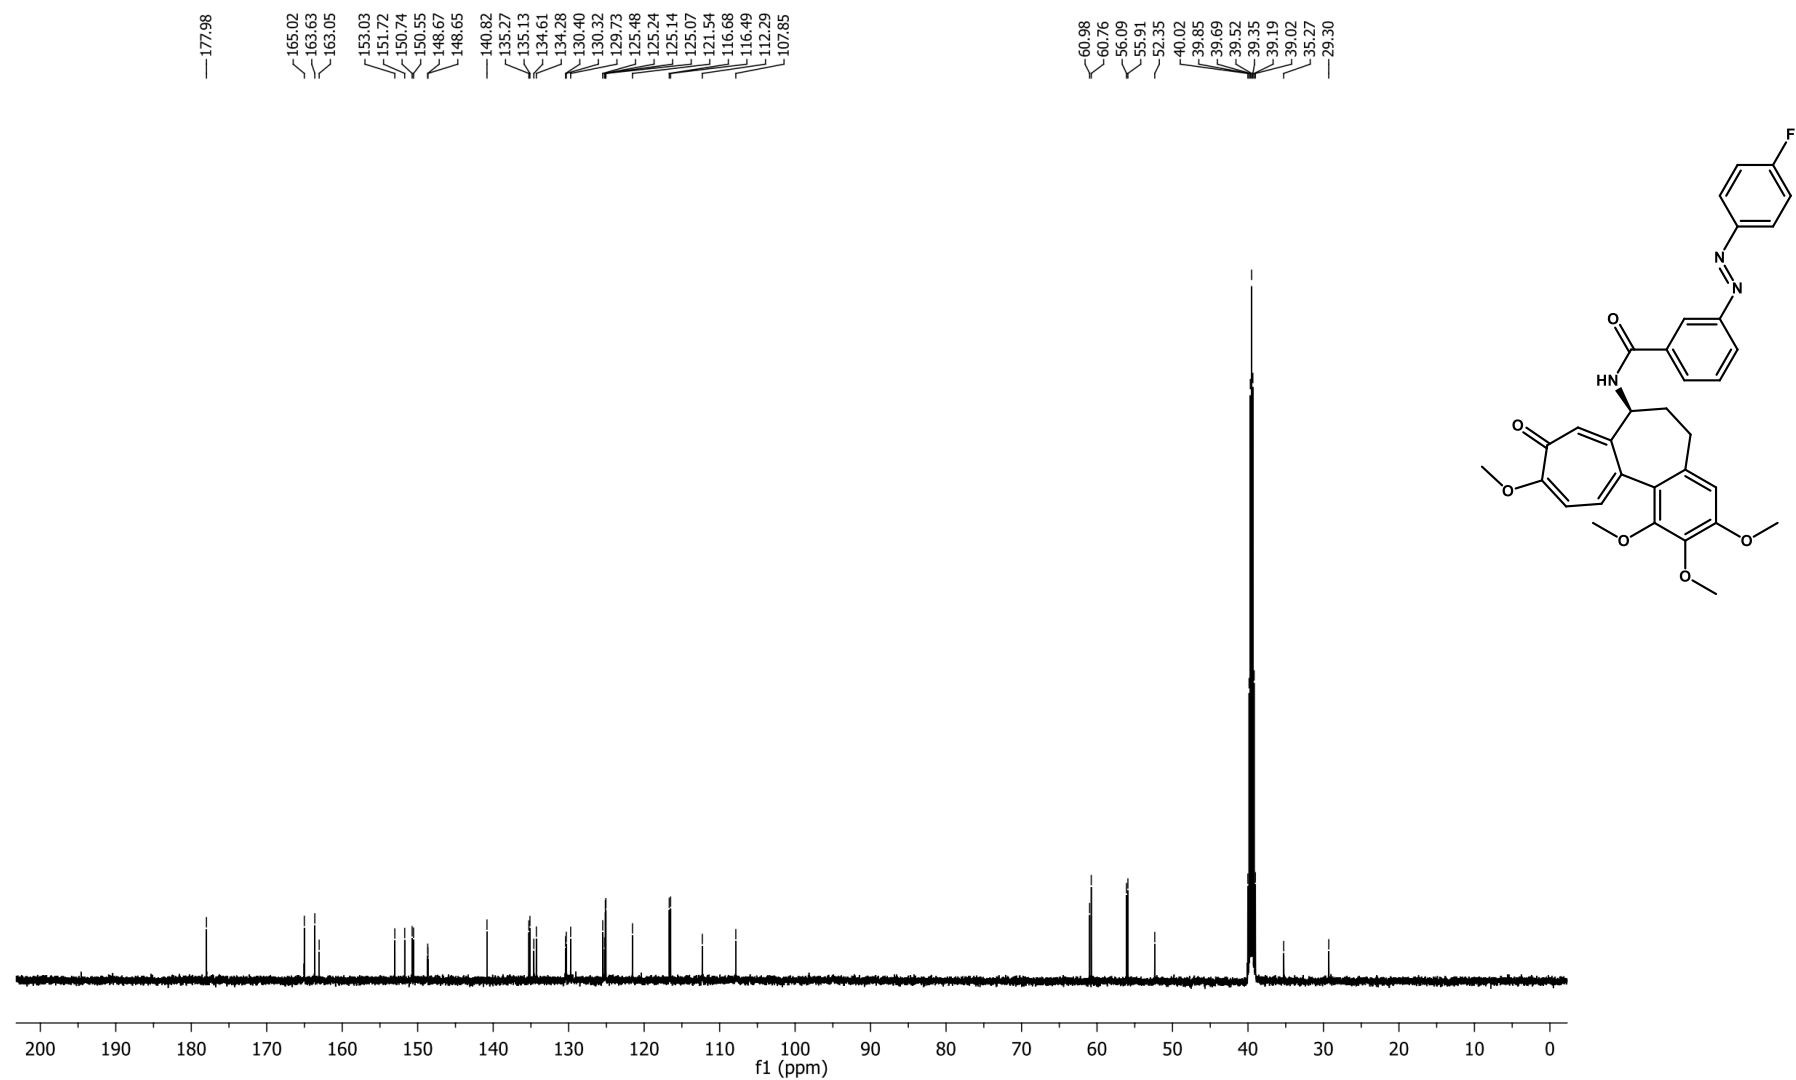

**Figure S82.**  $^{13}\text{C}$  NMR spectra of *m*-AzoCol4F ((S,E)-3-((4-fluorophenyl)diazenyl)-N-(1,2,3,10-tetramethoxy-9-oxo-5,6,7,9-tetrahydrobenzo[a]heptalen-7-yl)benzamide).

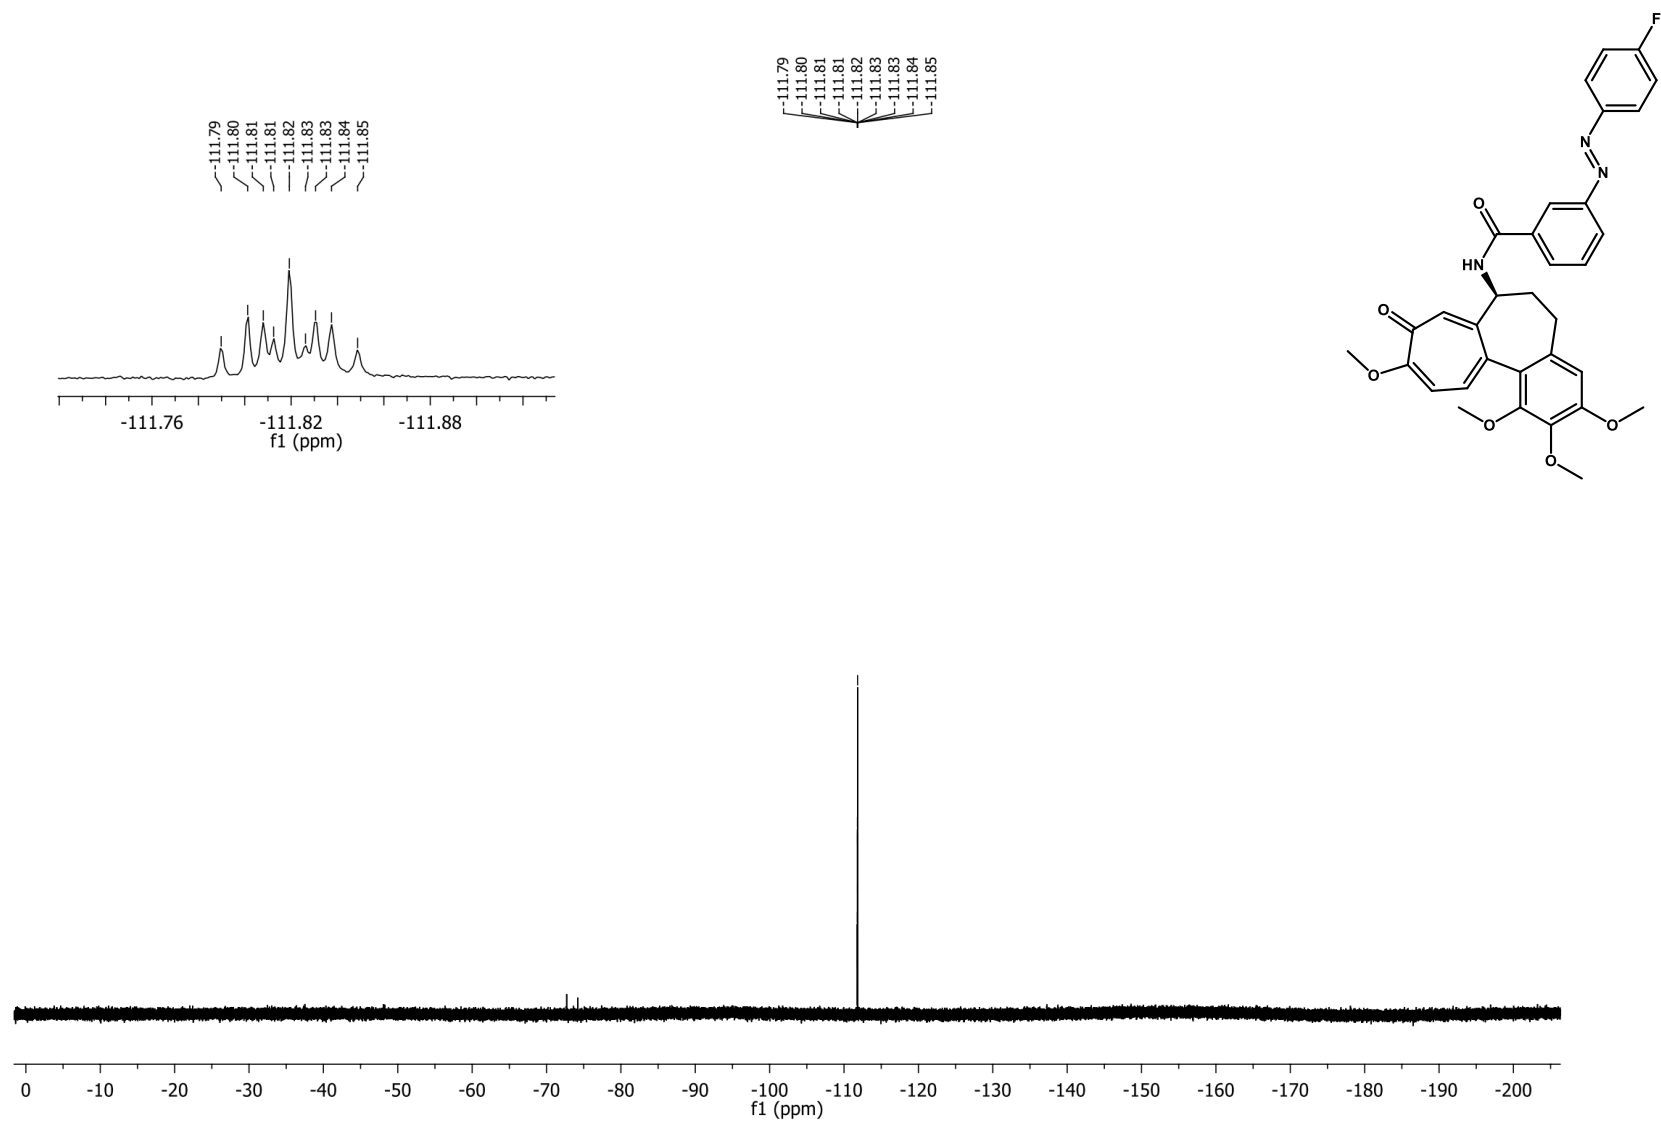

**Figure S83.**  $^{19}\text{F}$  NMR spectra of *m*-AzoCol4F ((S,E)-3-((4-fluorophenyl)diazenyl)-N-(1,2,3,10-tetramethoxy-9-oxo-5,6,7,9-tetrahydrobenzo[a]heptalen-7-yl)benzamide).

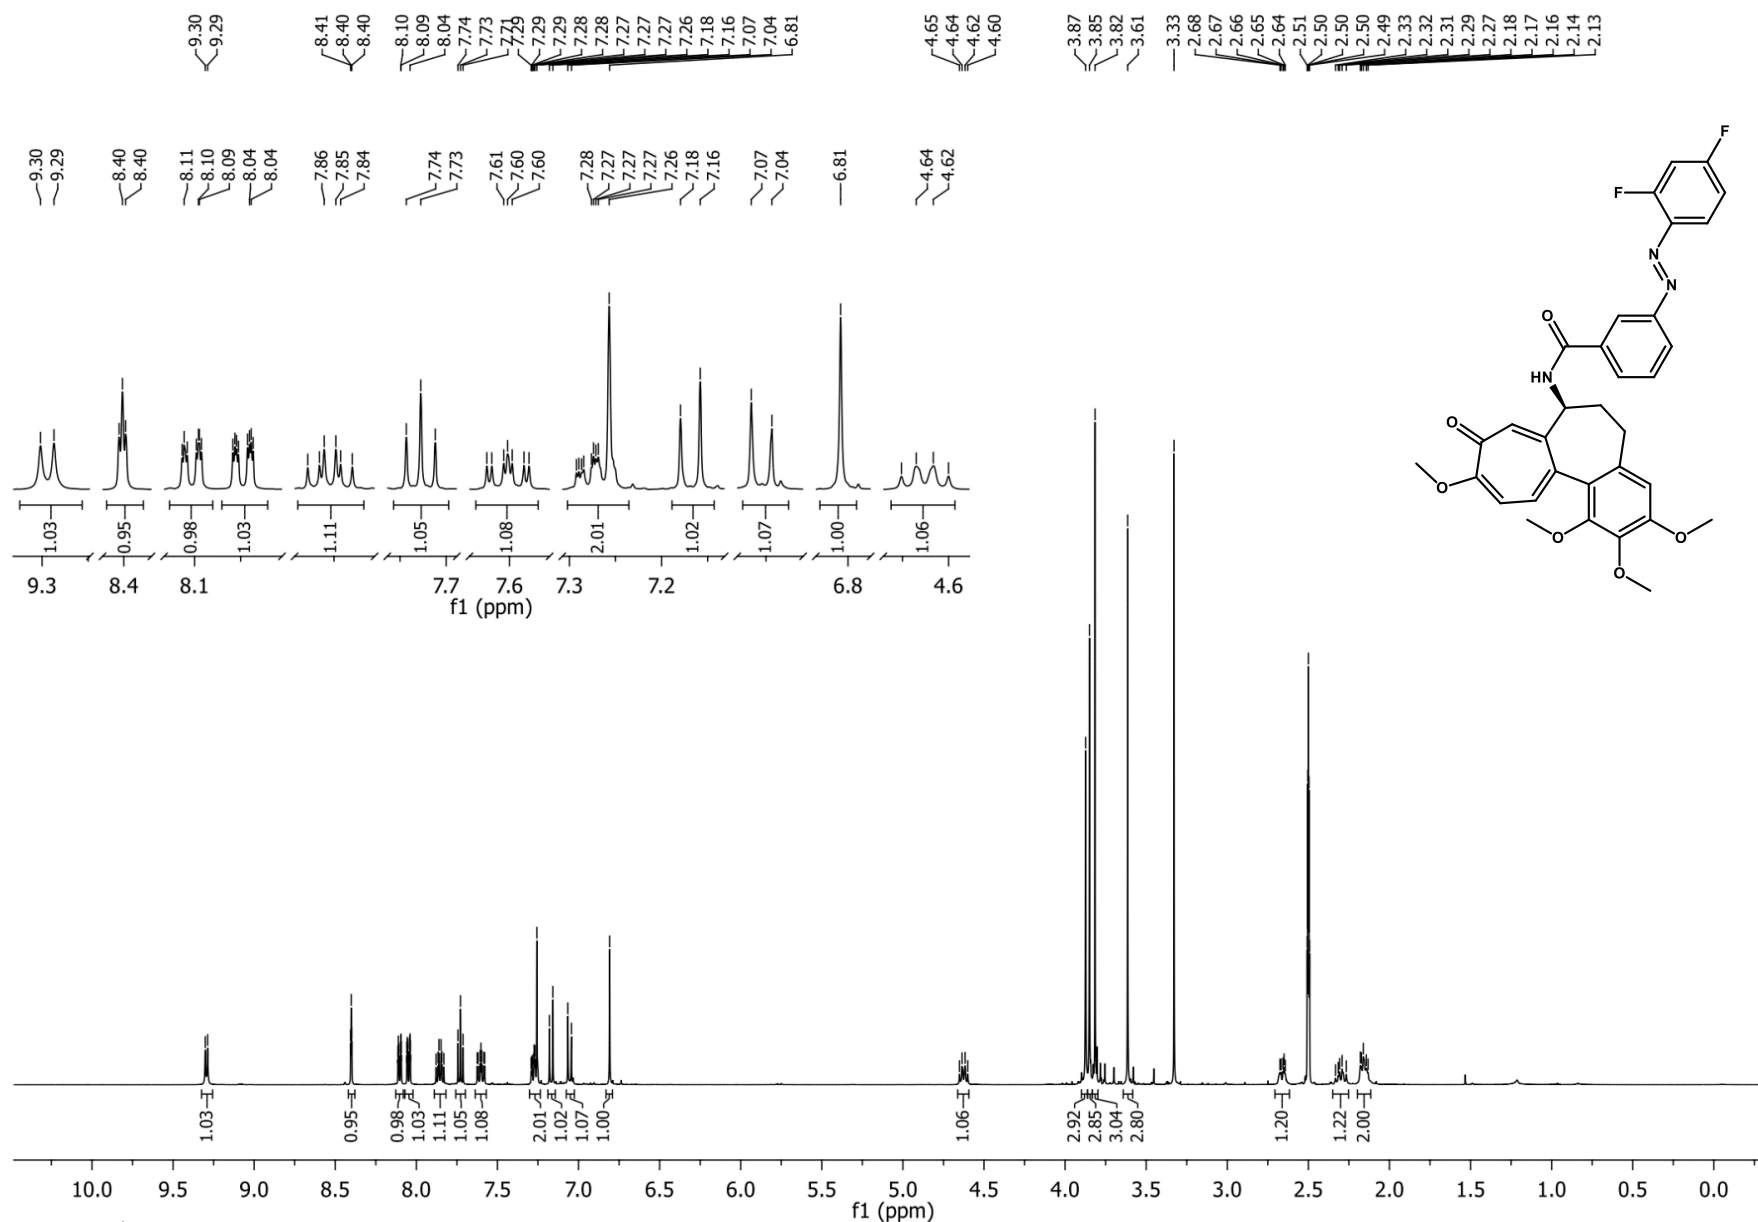

**Figure S84.**  $^1\text{H}$  NMR spectra of *m*-AzoCol24DF ((*S,E*)-3-((2,4-difluorophenyl)diazenyl)-*N*-(1,2,3,10-tetramethoxy-9-oxo-5,6,7,9-tetrahydrobenzo[*a*]heptalen-7-yl)benzamide).

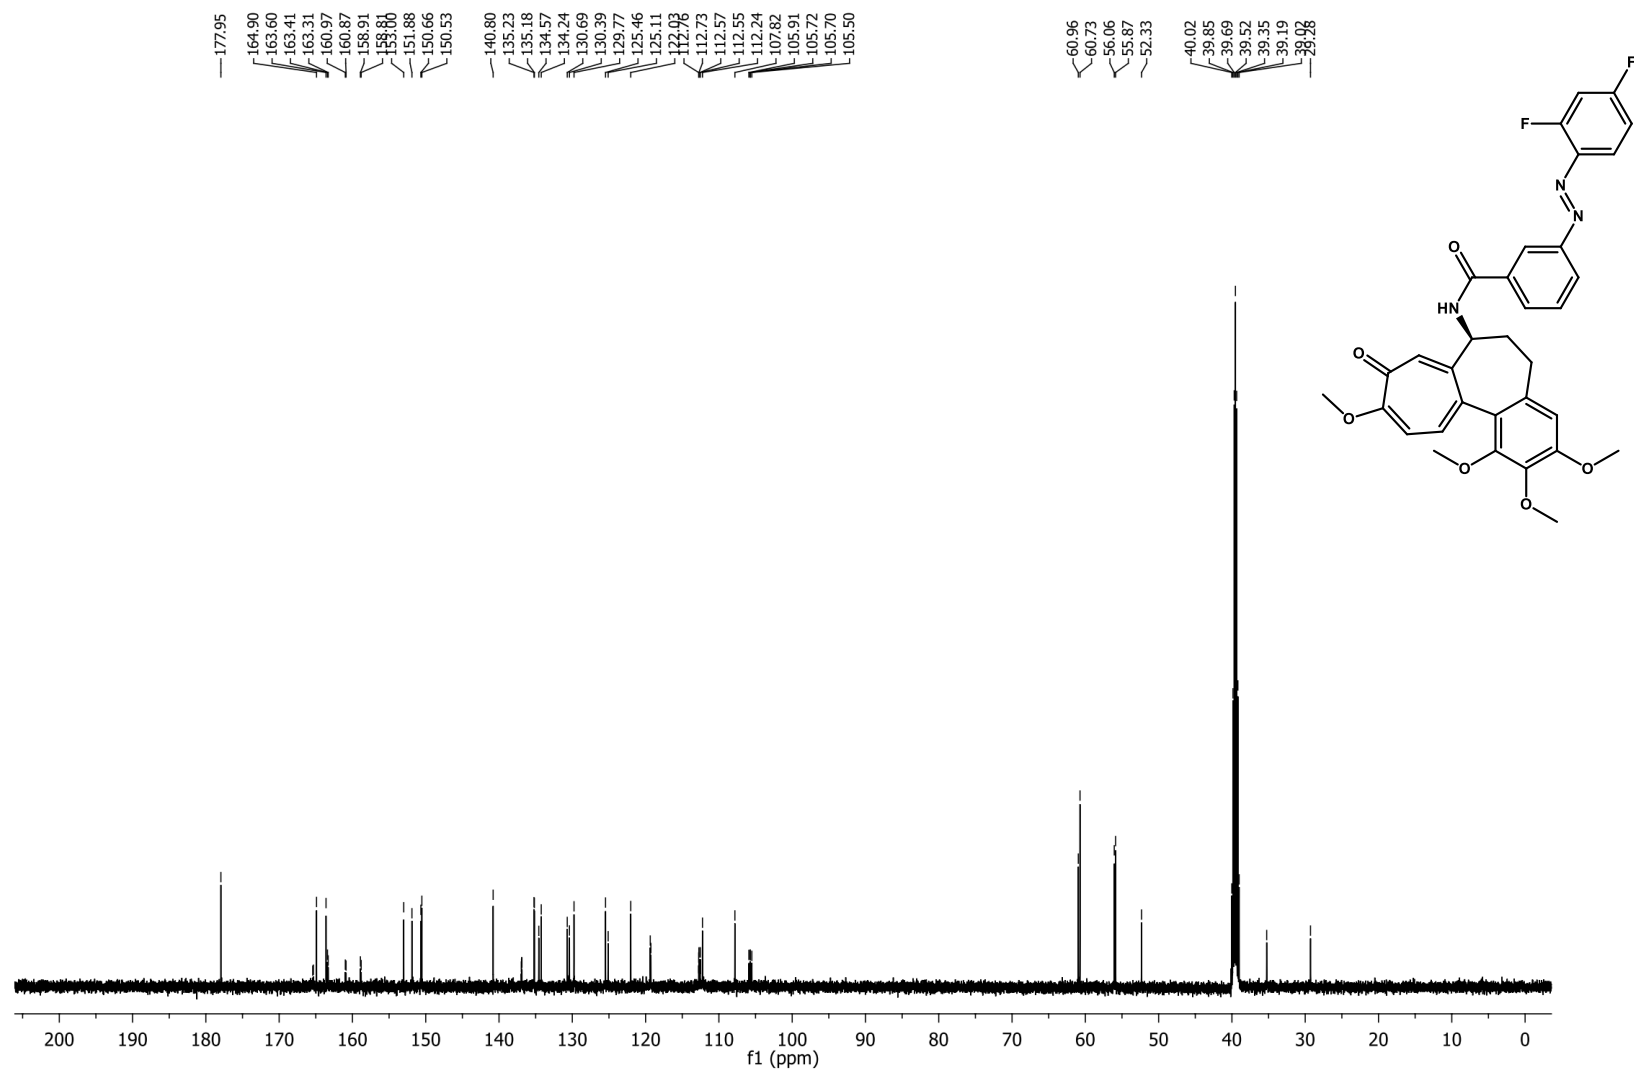

**Figure S85.** <sup>13</sup>C NMR spectra of *m*-AzoCol24DF ((S,E)-3-((2,4-difluorophenyl)diazenyl)-N-(1,2,3,10-tetramethoxy-9-oxo-5,6,7,9-tetrahydrobenzo[a]heptalen-7-yl)benzamide).



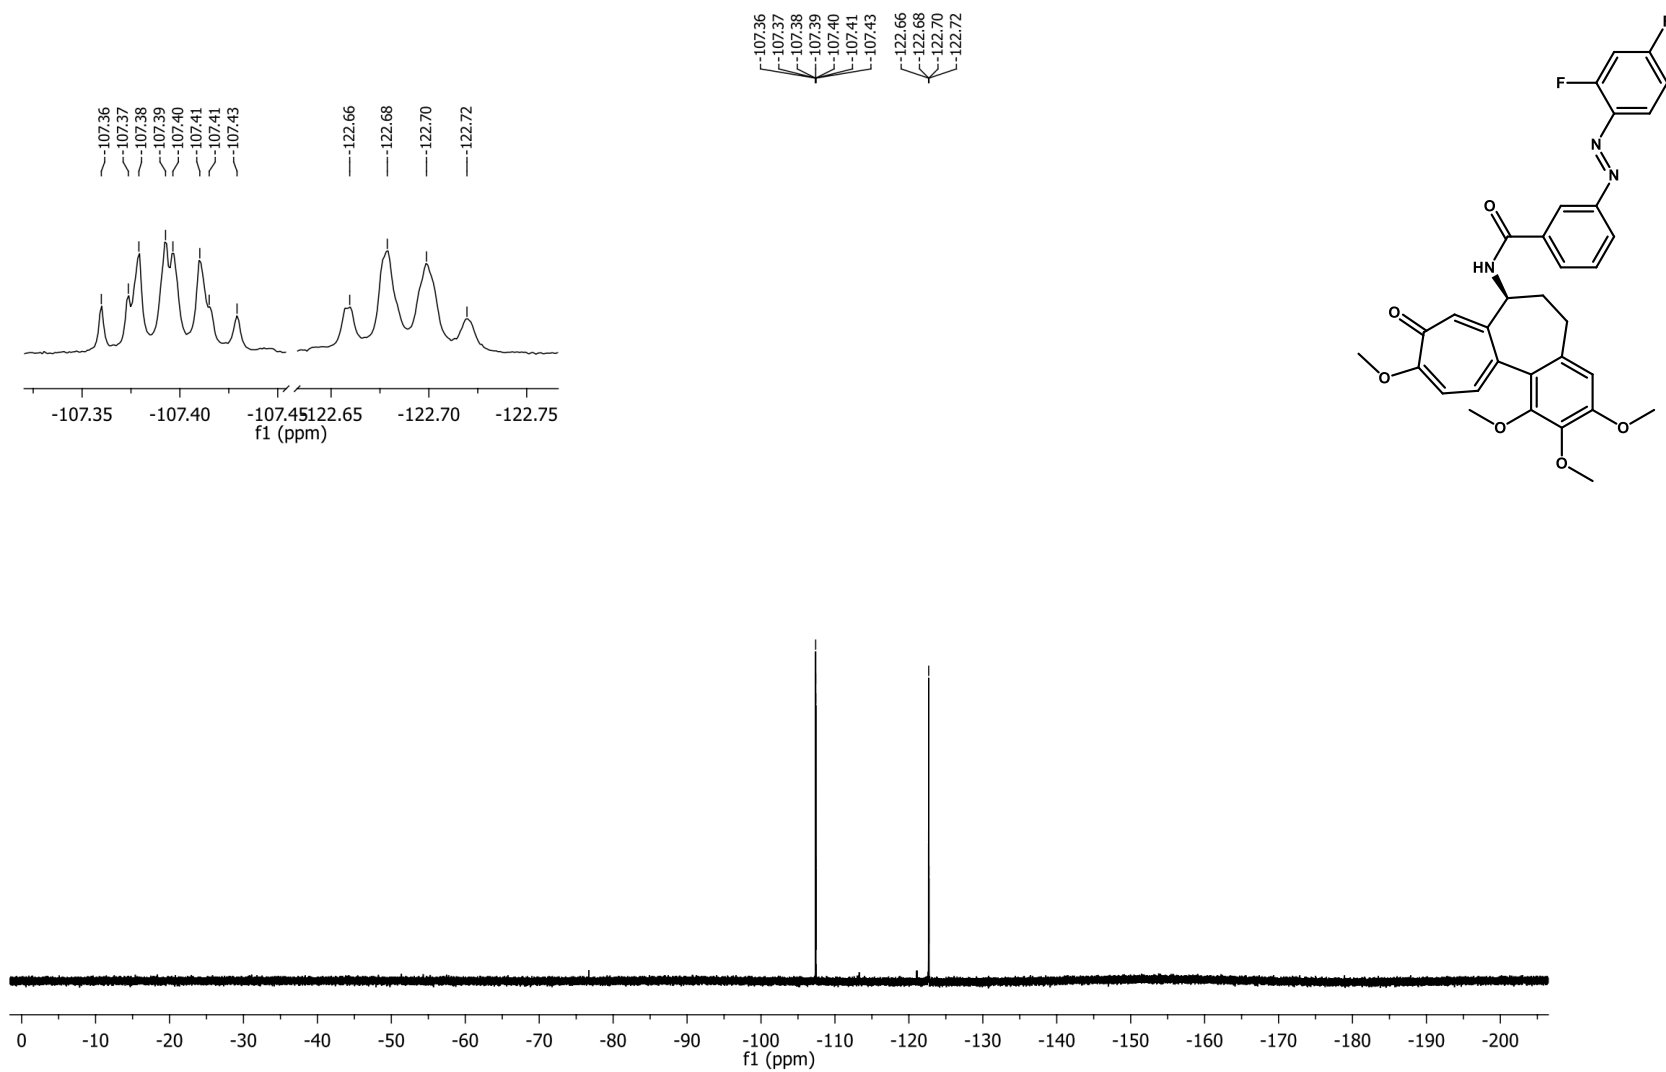

**Figure S86.**  $^{19}\text{F}$  NMR spectra of *m*-AzoCol24DF ((S,E)-3-((2,4-difluorophenyl)diazenyl)-N-(1,2,3,10-tetramethoxy-9-oxo-5,6,7,9-tetrahydrobenzo[a]heptalen-7-yl)benzamide).



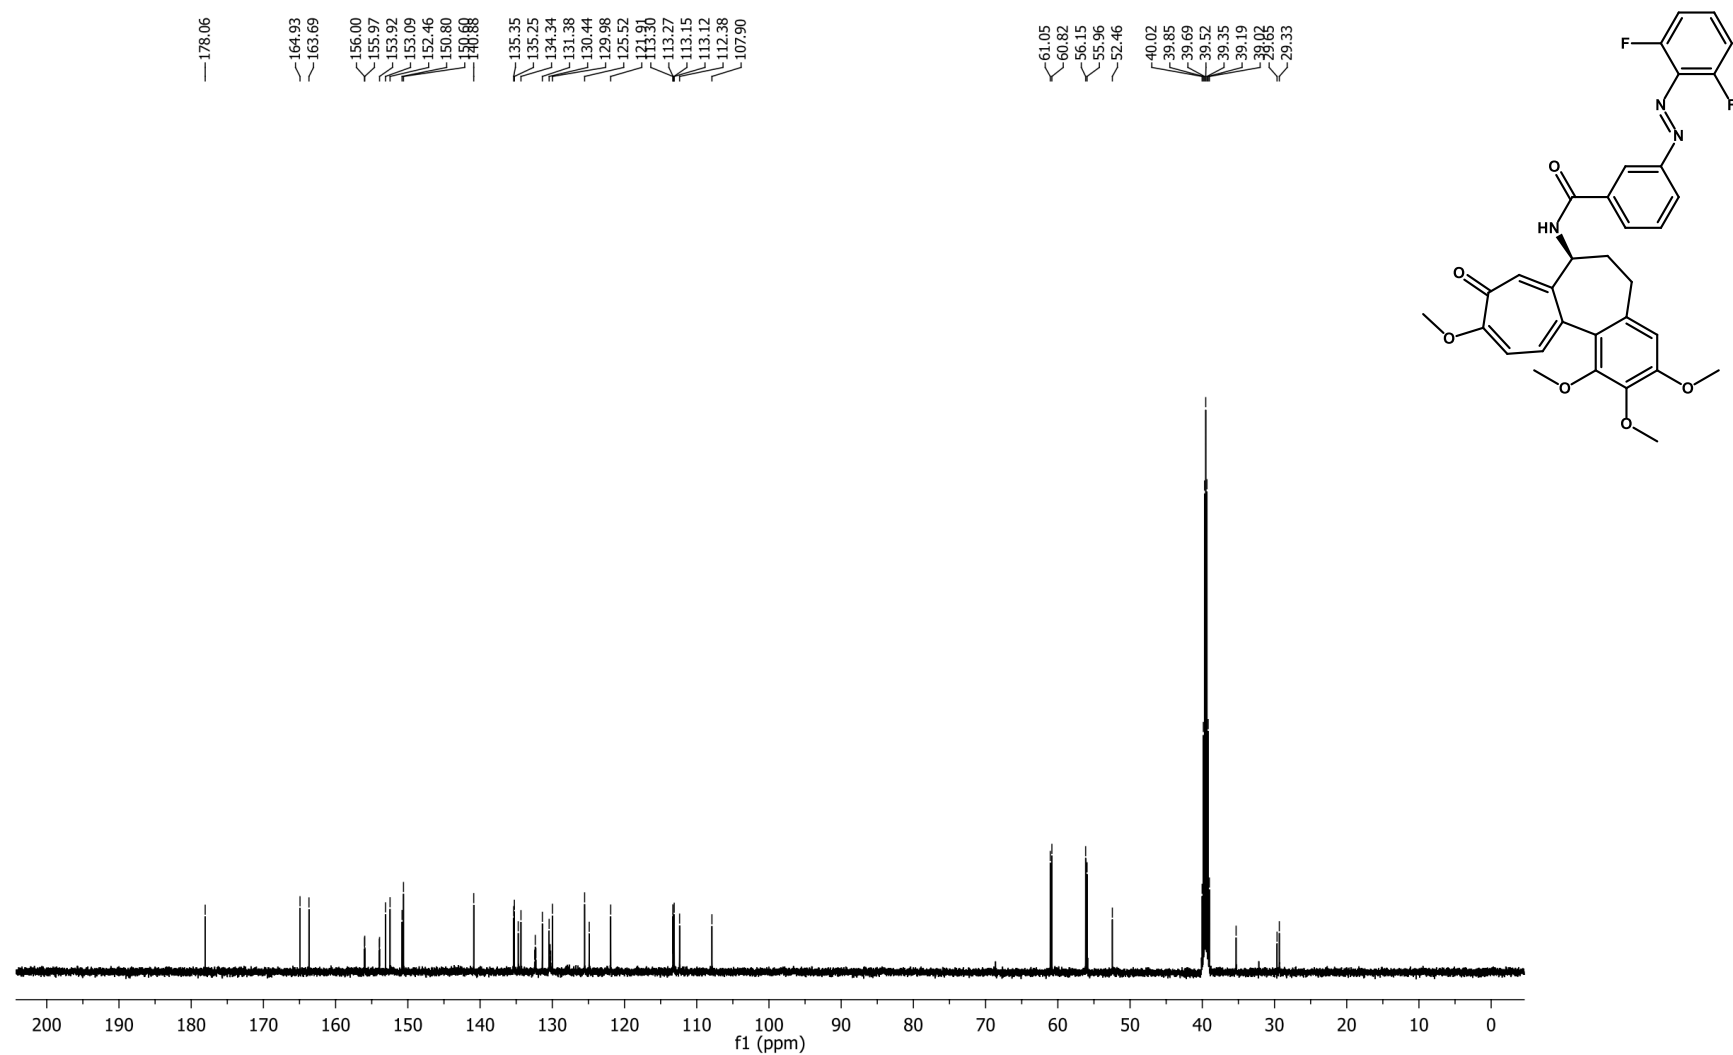

**Figure S88.**  $^{13}\text{C}$  NMR spectra of *m*-AzoCol26DF ((S,E)-3-((2,6-difluorophenyl)diazenyl)-N-(1,2,3,10-tetramethoxy-9-oxo-5,6,7,9-tetrahydrobenzo[a]heptalen-7-yl)benzamide).

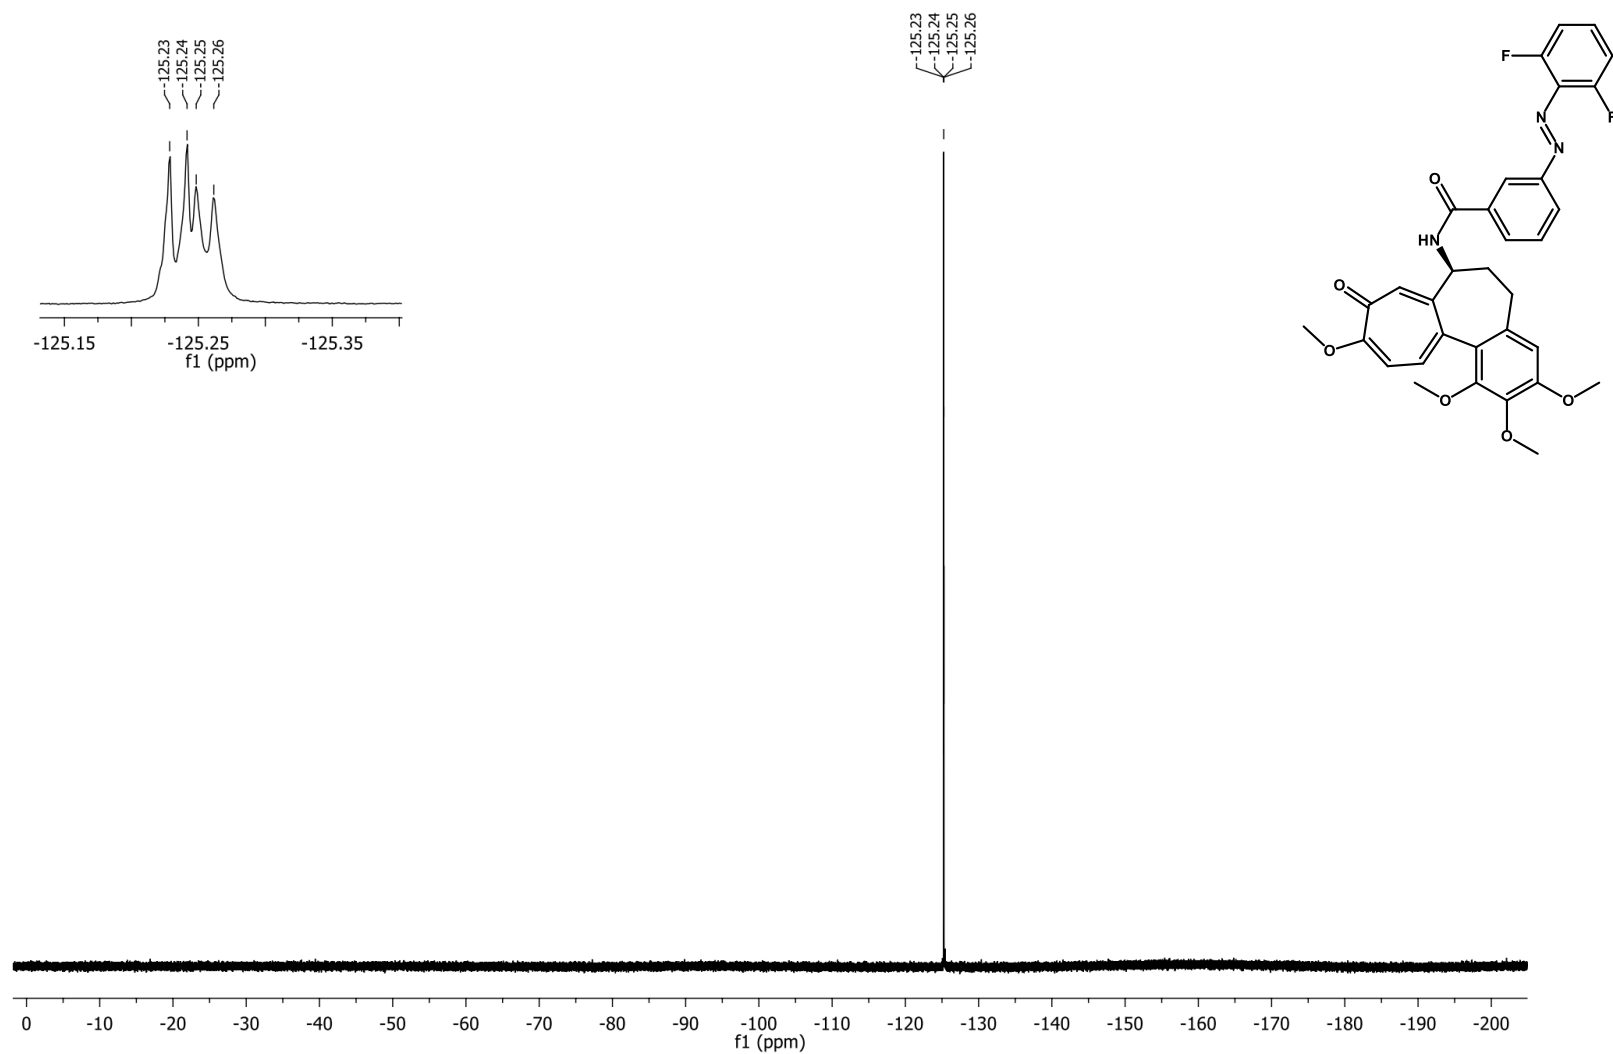

**Figure S89.**  $^{19}\text{F}$  NMR spectra of *m*-AzoCol26DF ((S,E)-3-((2,6-difluorophenyl)diazenyl)-N-(1,2,3,10-tetramethoxy-9-oxo-5,6,7,9-tetrahydrobenzo[a]heptalen-7-yl)benzamide).

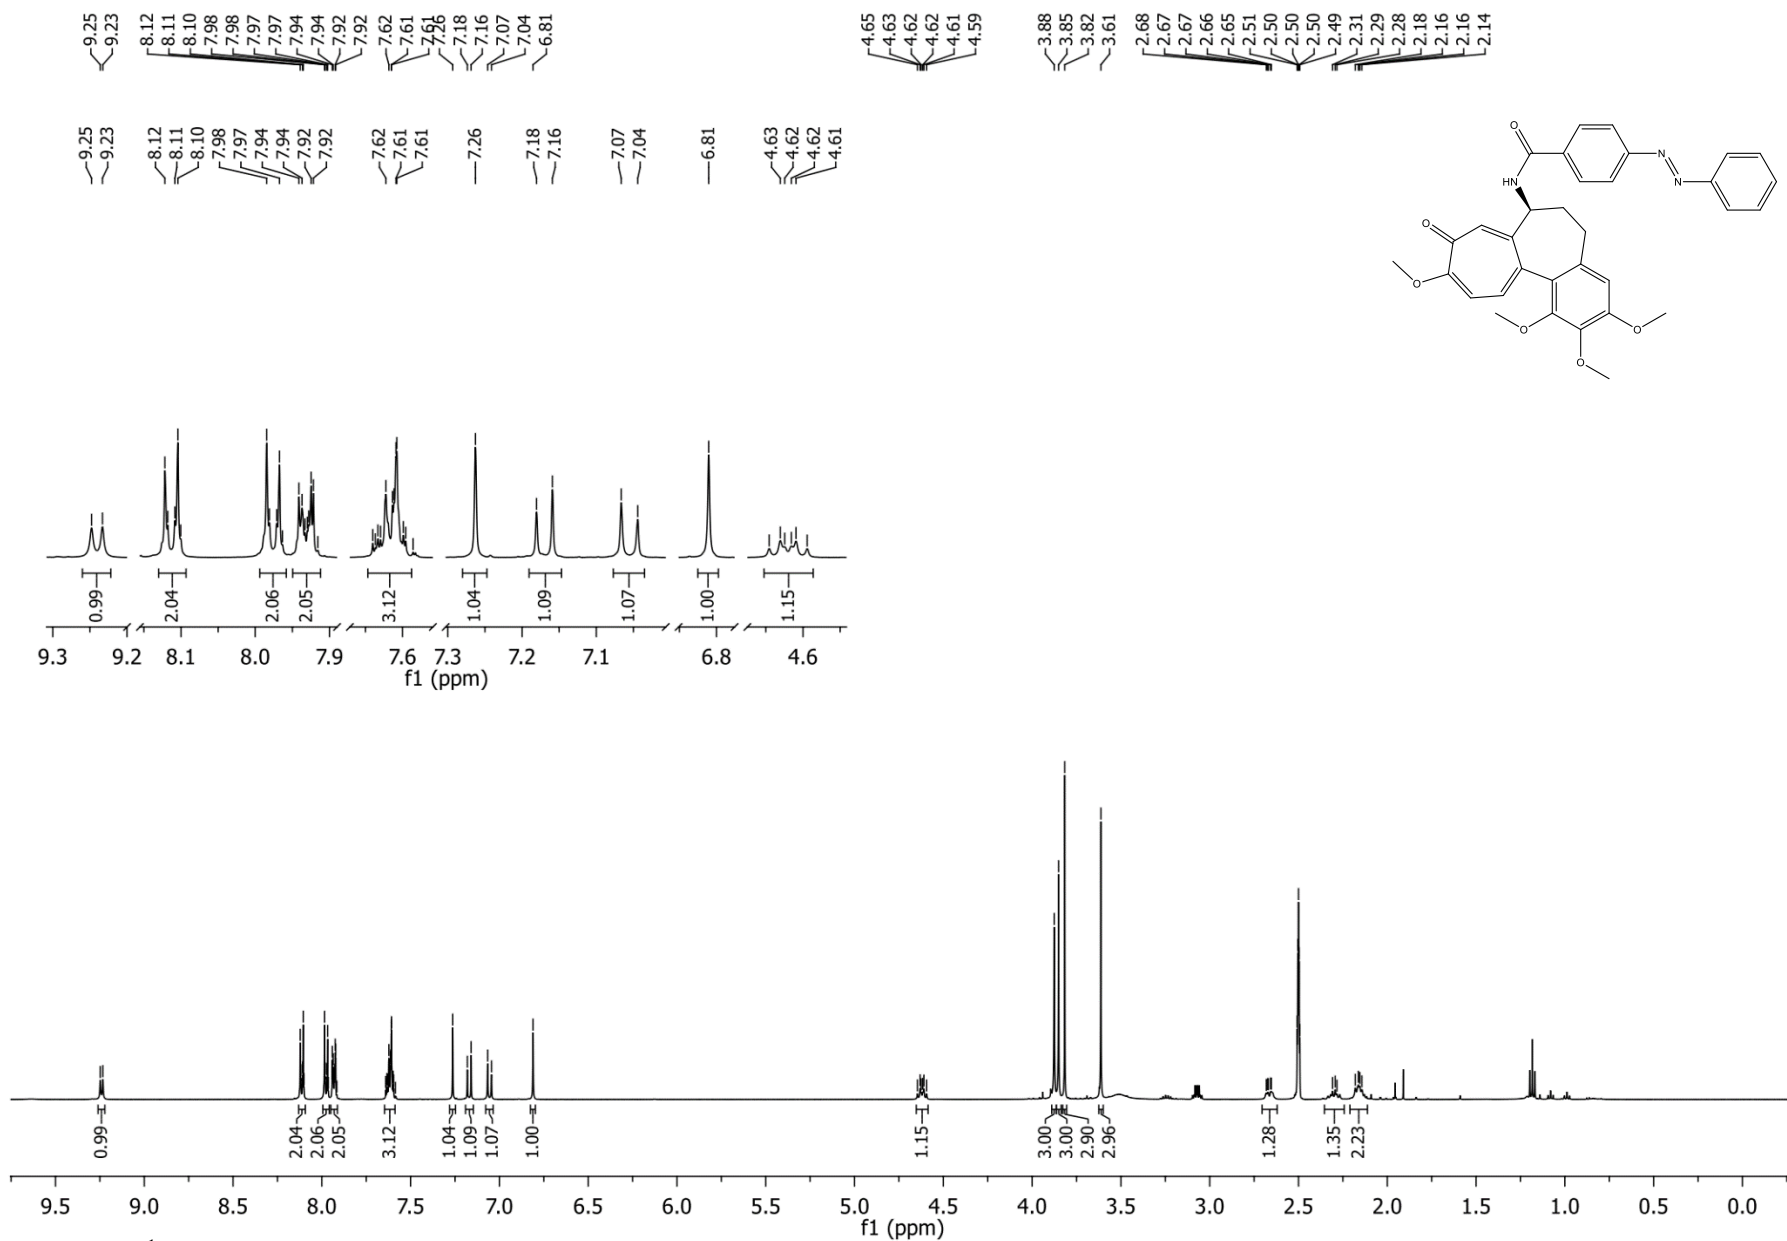

**Figure S90.**  $^1\text{H}$  NMR spectra of *p*-AzoCol ((*S,E*)-4-(phenyldiazenyl)-*N*-(1,2,3,10-tetramethoxy-9-oxo-5,6,7,9-tetrahydrobenzo[*a*]heptalen-7-yl)benzamide).

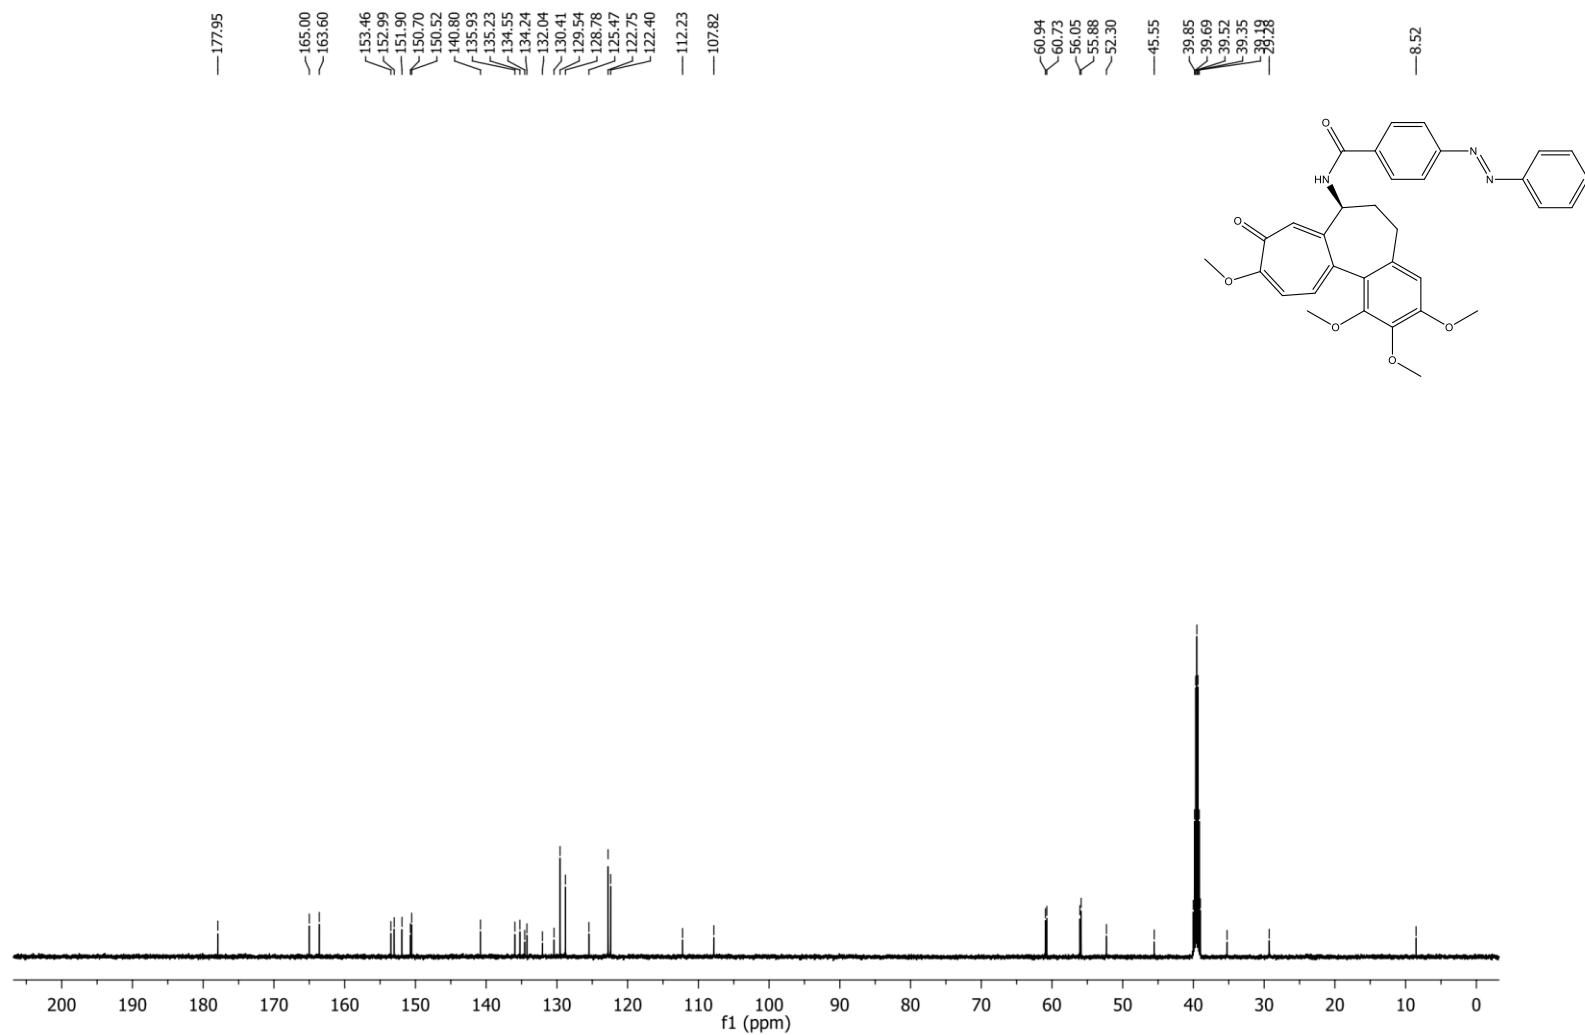

**Figure S91.**  $^{13}\text{C}$  NMR spectra of *p*-AzoCol ((S,E)-4-(phenyldiazenyl)-N-(1,2,3,10-tetramethoxy-9-oxo-5,6,7,9-tetrahydrobenzo[a]heptalen-7-yl)benzamide).

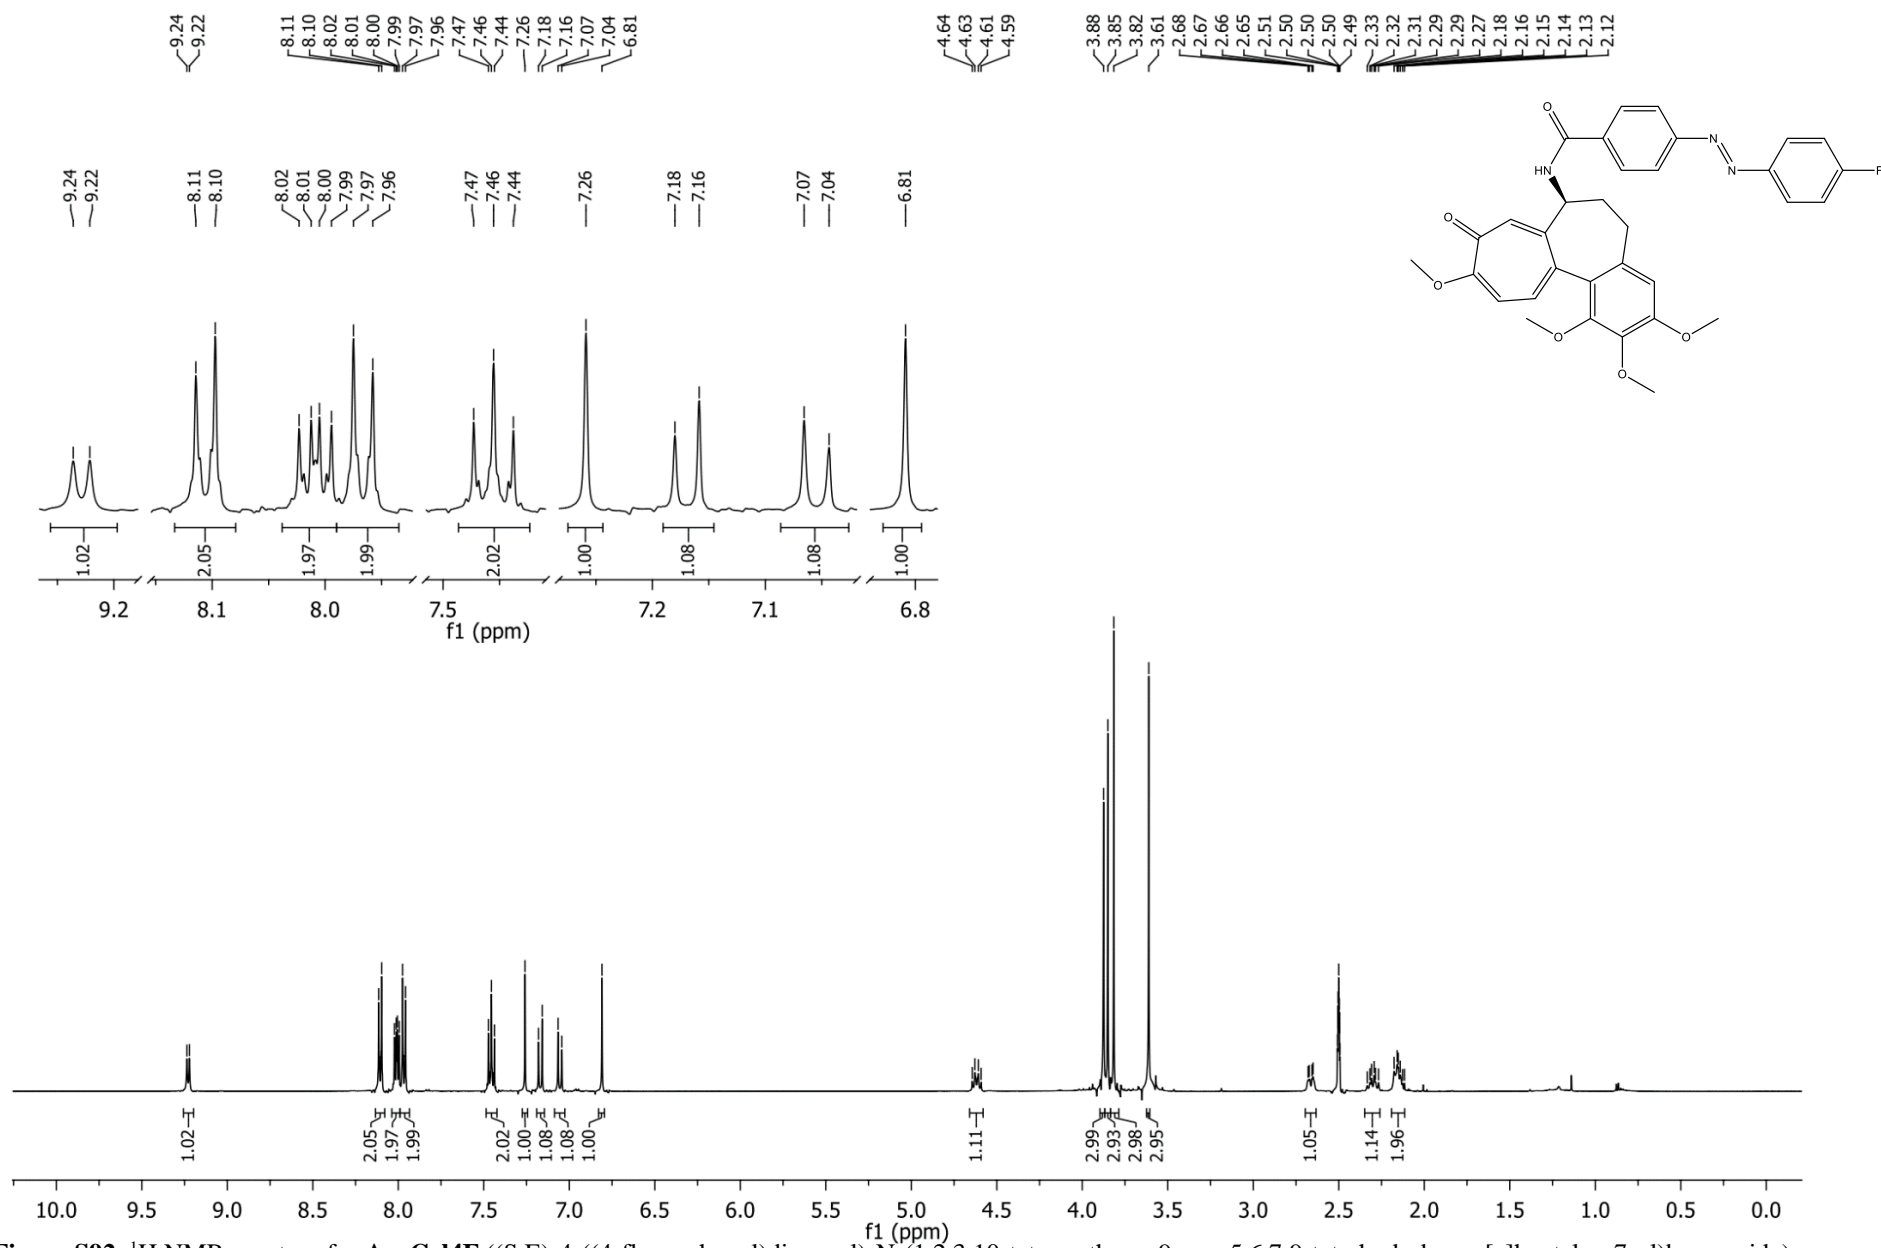

**Figure S92.**  $^1\text{H}$  NMR spectra of *p*-AzoCol4F ((*S,E*)-4-((4-fluorophenyl)diazenyl)-*N*-(1,2,3,10-tetramethoxy-9-oxo-5,6,7,9-tetrahydrobenzo[*a*]heptalen-7-yl)benzamide).

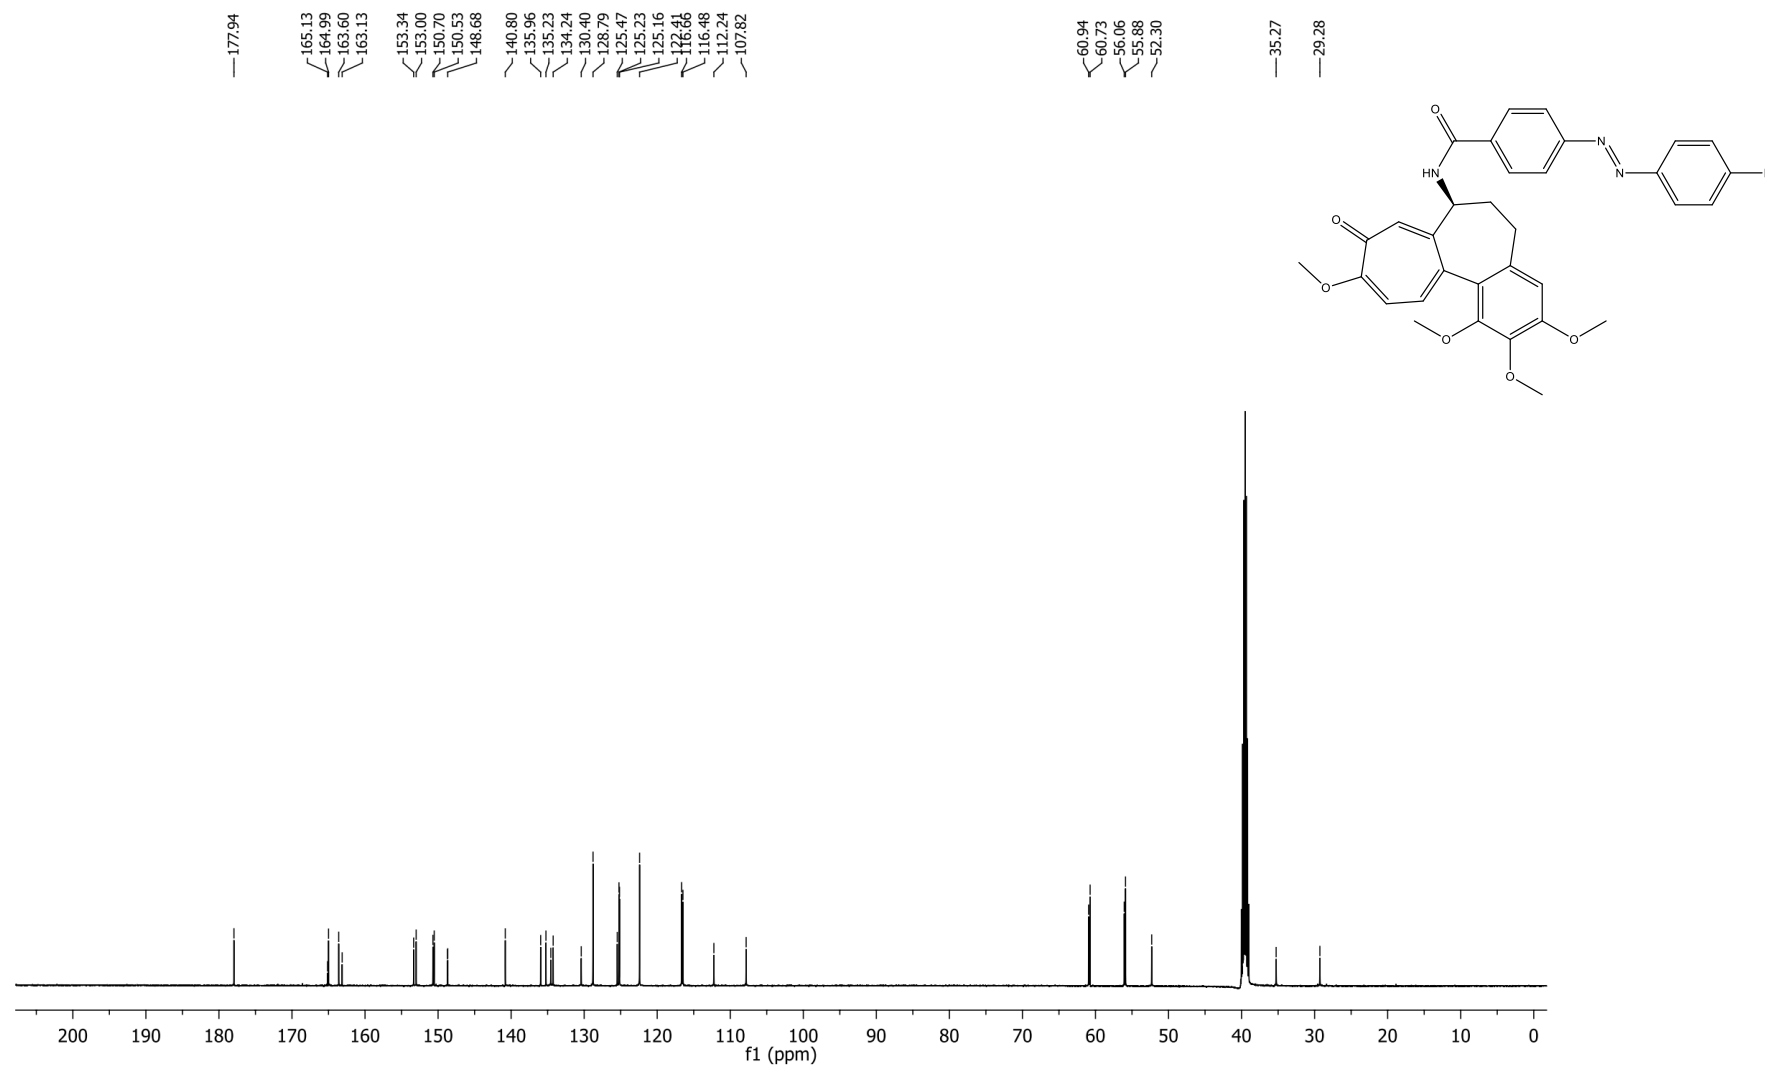

**Figure S93.**  $^{13}\text{C}$  NMR spectra of *p*-AzoCol4F ((S,E)-4-((4-fluorophenyl)diazenyl)-N-(1,2,3,10-tetramethoxy-9-oxo-5,6,7,9-tetrahydrobenzo[*a*]heptalen-7-yl)benzamide).



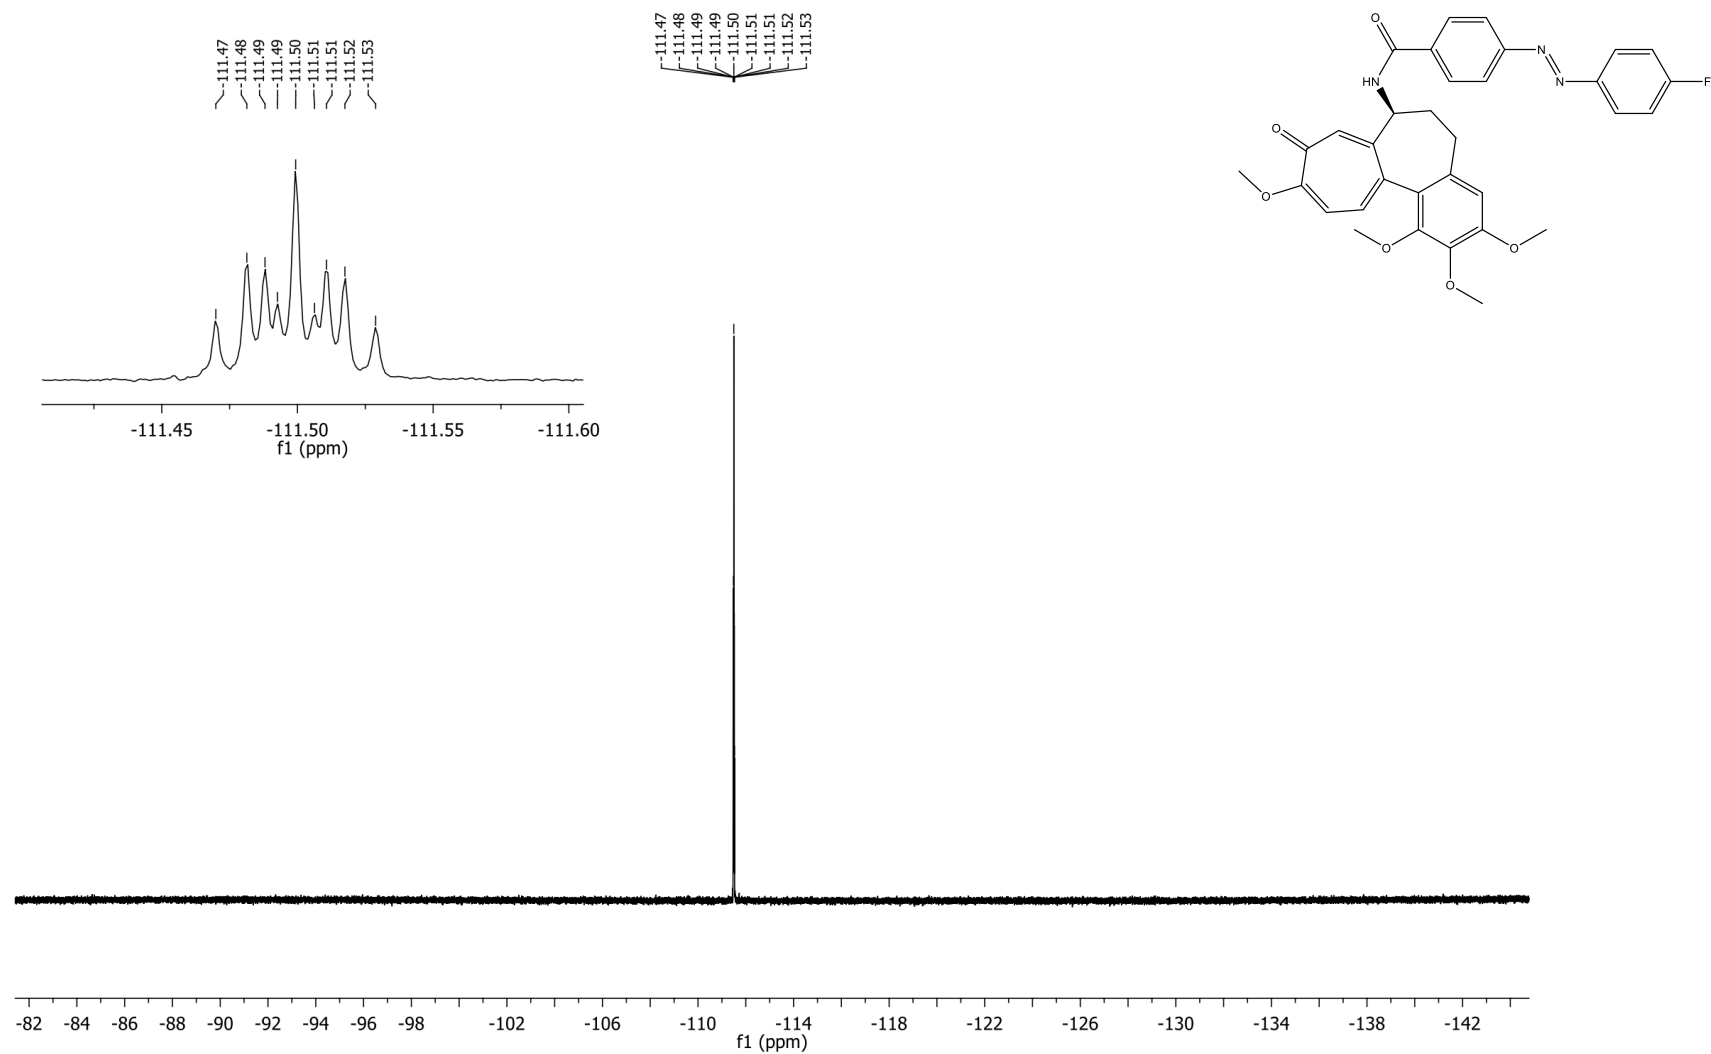

**Figure S94.**  $^{19}\text{F}$  NMR spectra of *p*-AzoCol4F ((S,E)-4-((4-fluorophenyl)diazenyl)-N-(1,2,3,10-tetramethoxy-9-oxo-5,6,7,9-tetrahydrobenzo[a]heptalen-7-yl)benzamide).

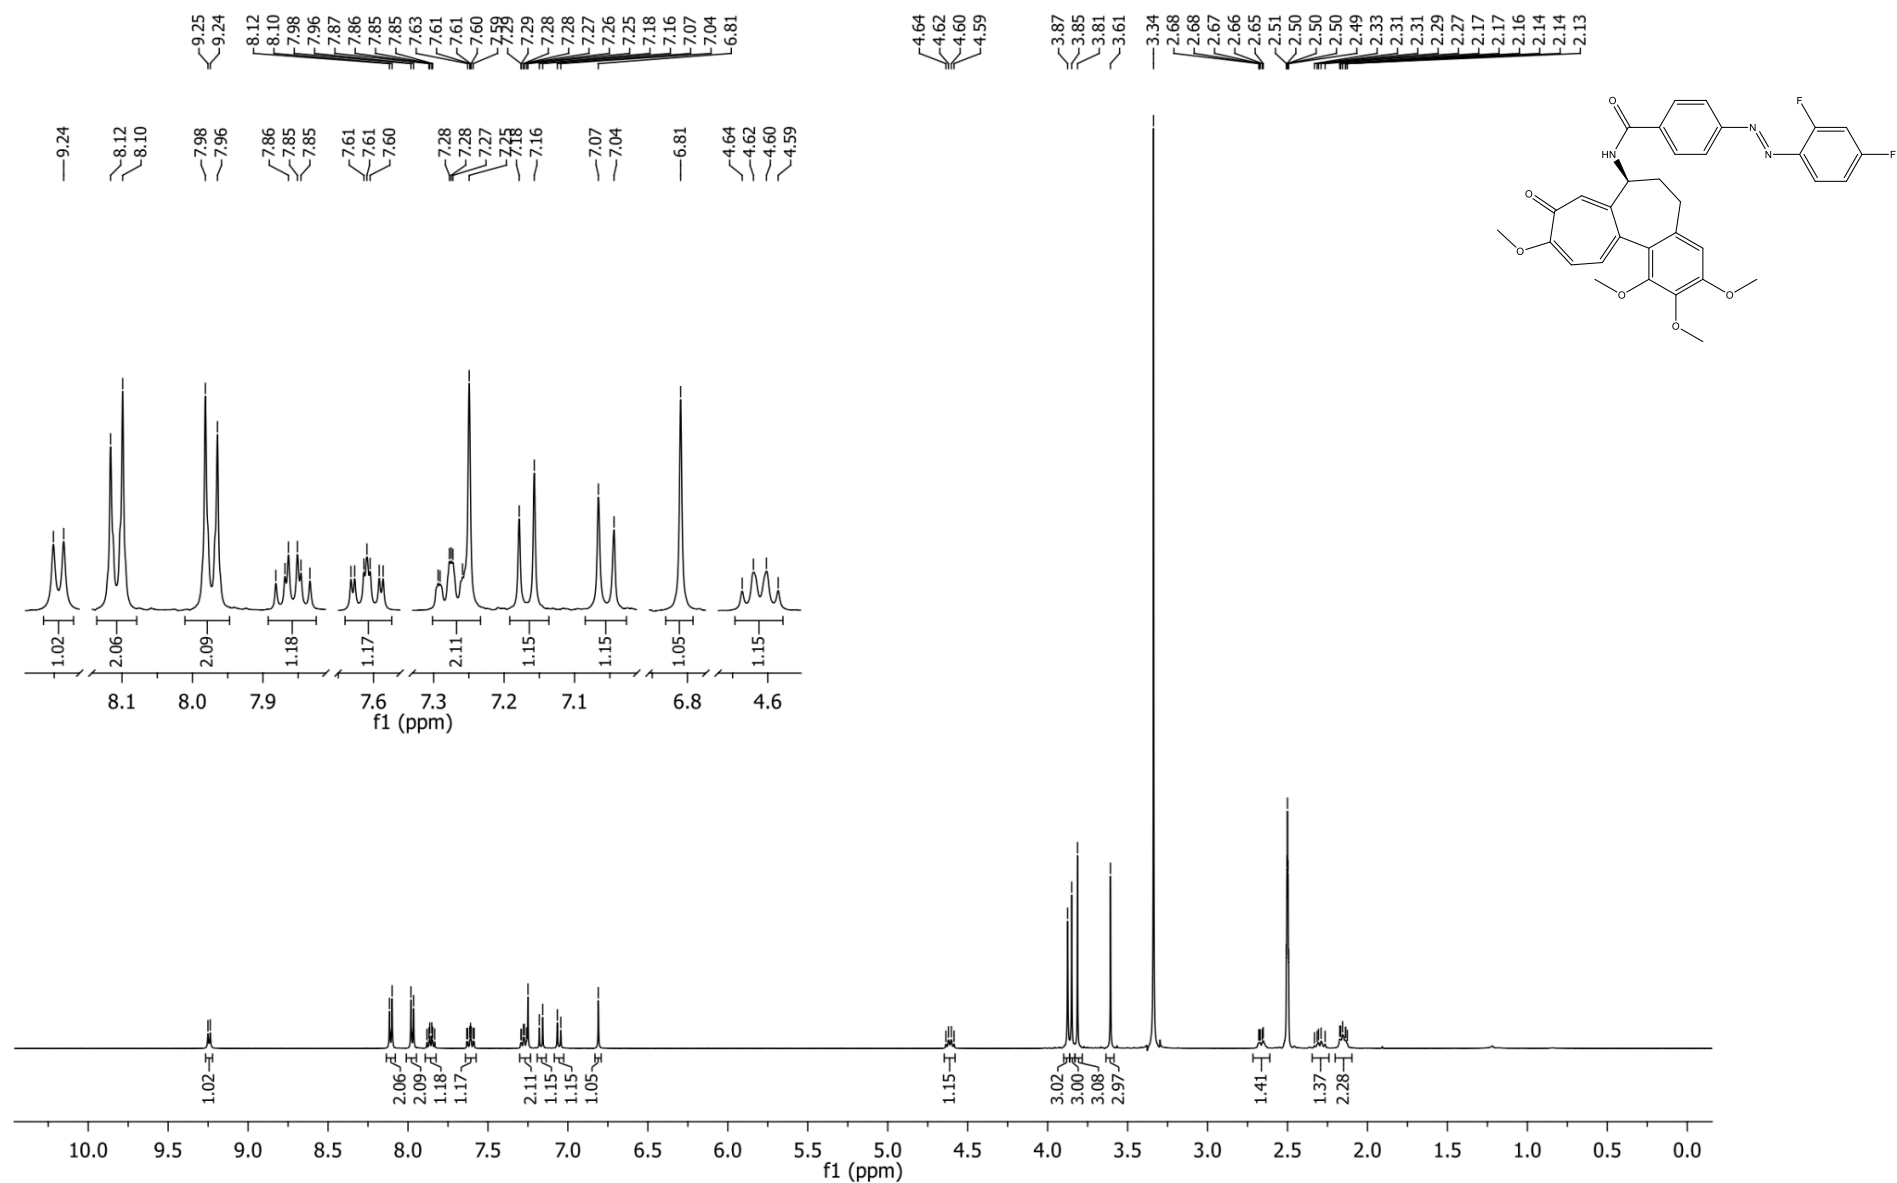

**Figure S95.**  $^1\text{H}$  NMR spectra of *p*-AzoCol24DF ((*S,E*)-4-((2,4-difluorophenyl)diazenyl)-*N*-(1,2,3,10-tetramethoxy-9-oxo-5,6,7,9-tetrahydrobenzo[*a*]heptalen-7-yl)benzamide).

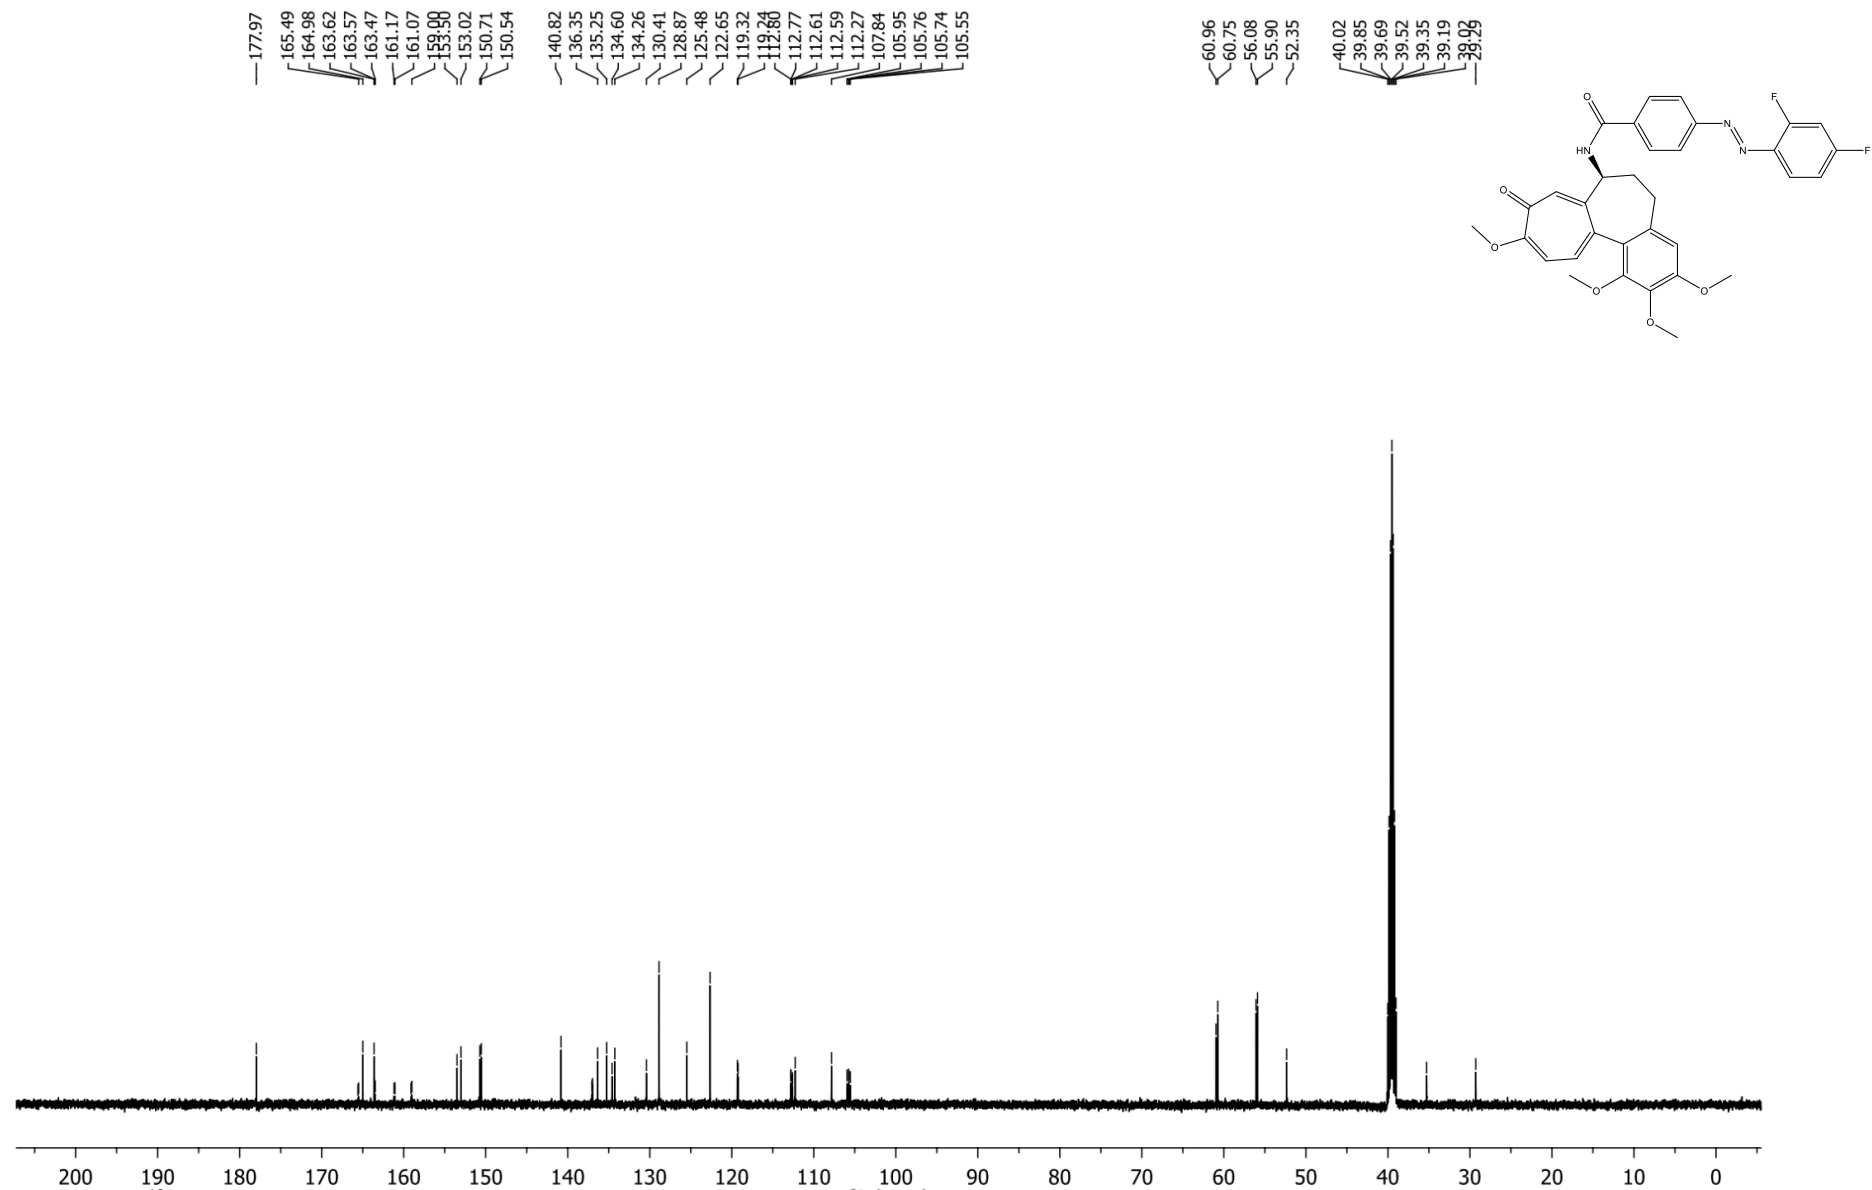

**Figure S96.** <sup>13</sup>C NMR spectra of *p*-AzoCol24DF ((S,E)-4-((2,4-difluorophenyl)diazenyl)-N-(1,2,3,10-tetramethoxy-9-oxo-5,6,7,9-tetrahydrobenzo[a]heptalen-7-yl)benzamide).

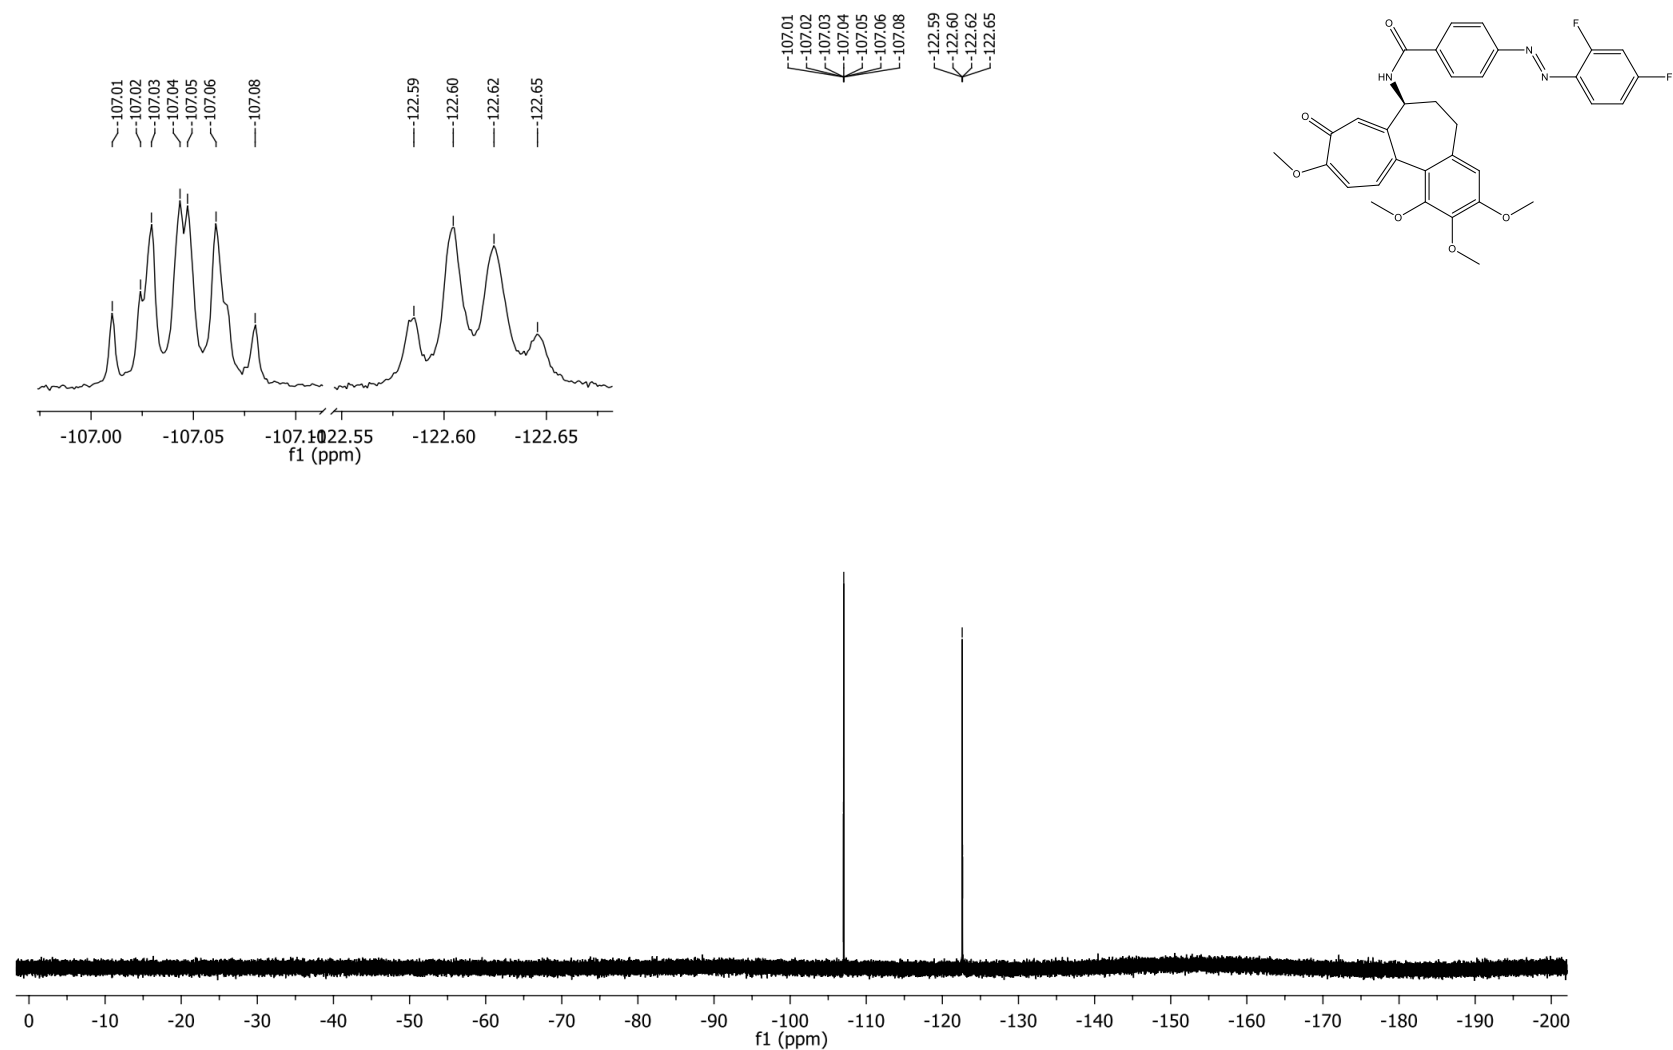

**Figure S97.**  $^{19}\text{F}$  NMR spectra of *p*-AzoCol24DF ((*S,E*)-4-((2,4-difluorophenyl)diazenyl)-*N*-(1,2,3,10-tetramethoxy-9-oxo-5,6,7,9-tetrahydrobenzo[*a*]heptalen-7-yl)benzamide).

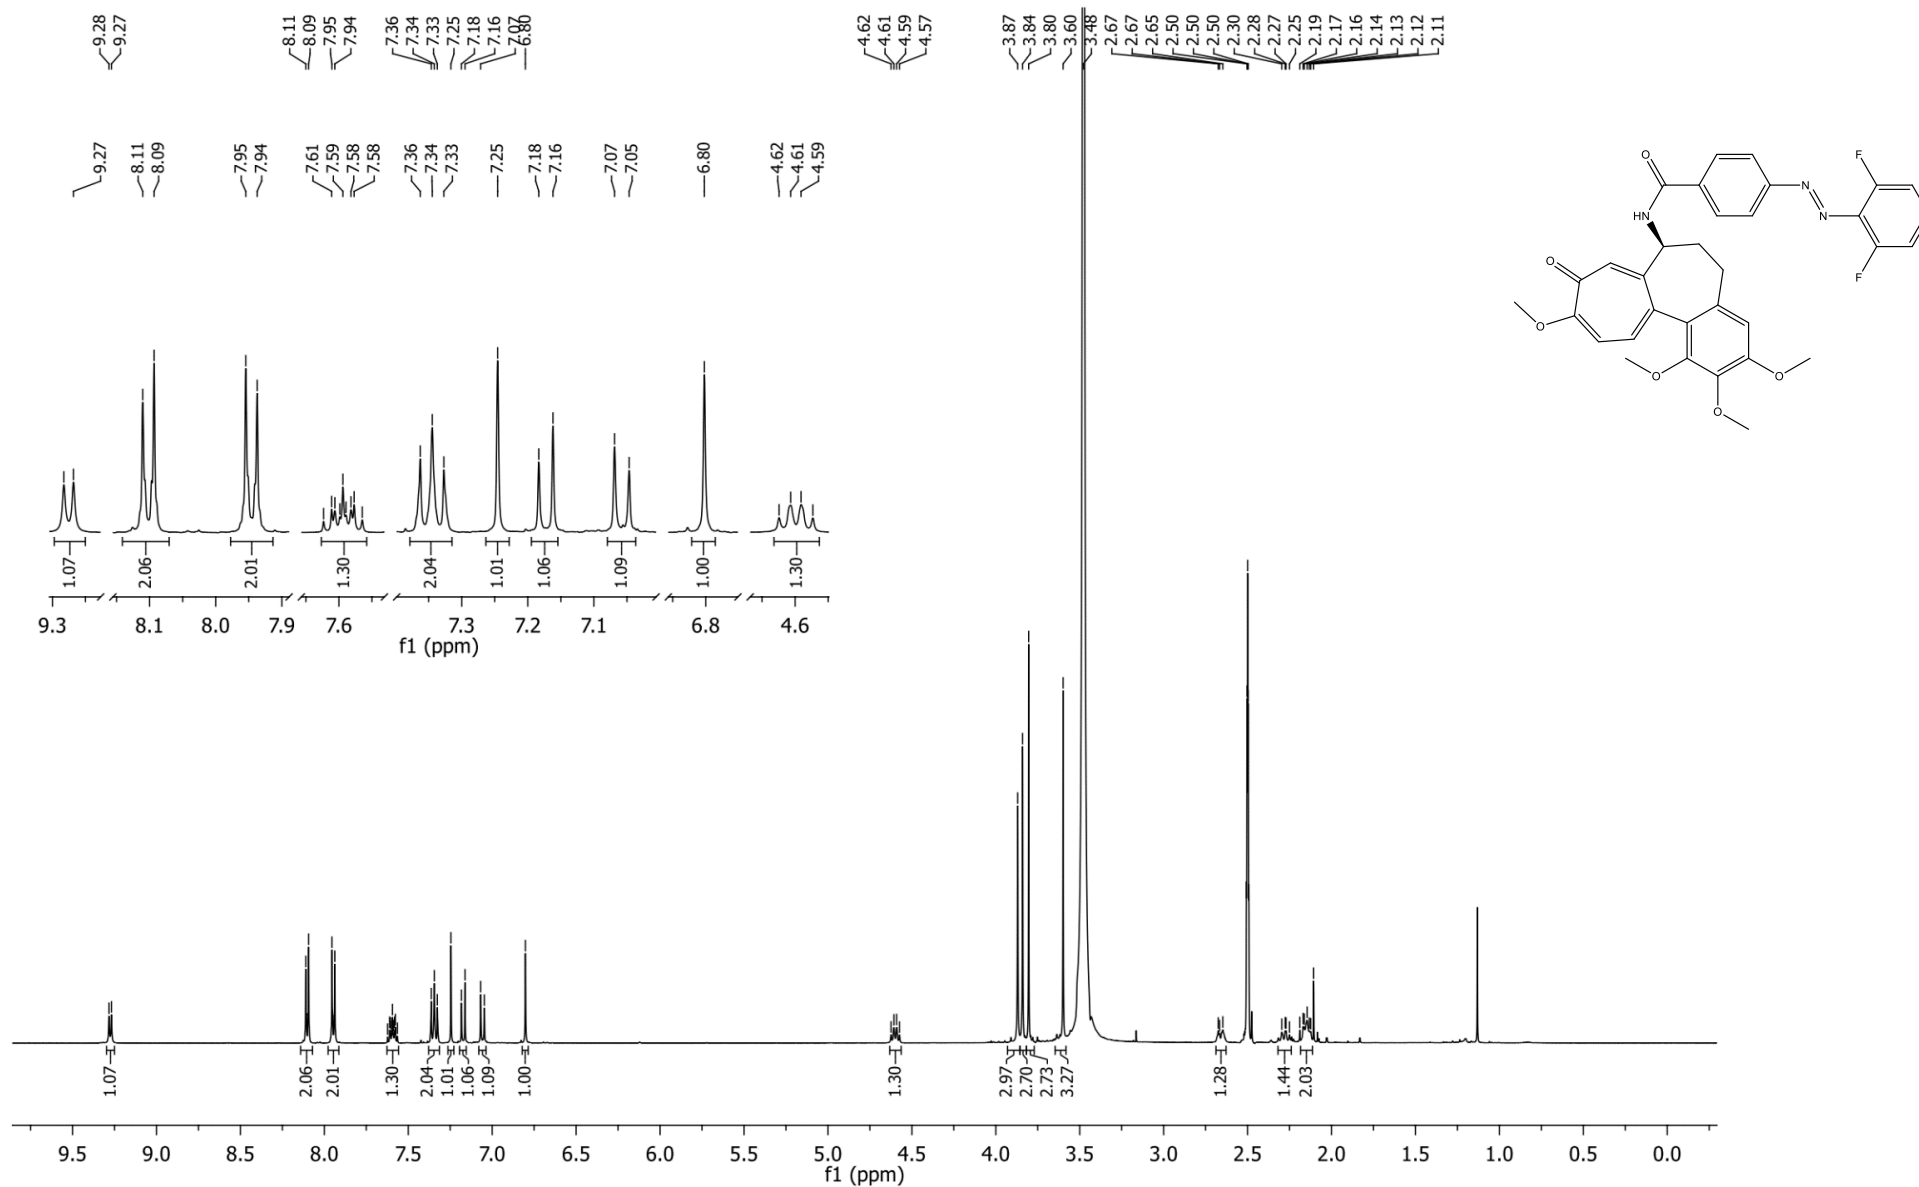

**Figure S98.**  $^1\text{H}$  NMR spectra of *p*-**AzoCol26DF** ((*S,E*)-4-((2,6-difluorophenyl)diazenyl)-*N*-(1,2,3,10-tetramethoxy-9-oxo-5,6,7,9-tetrahydrobenzo[*a*]heptalen-7-yl)benzamide).

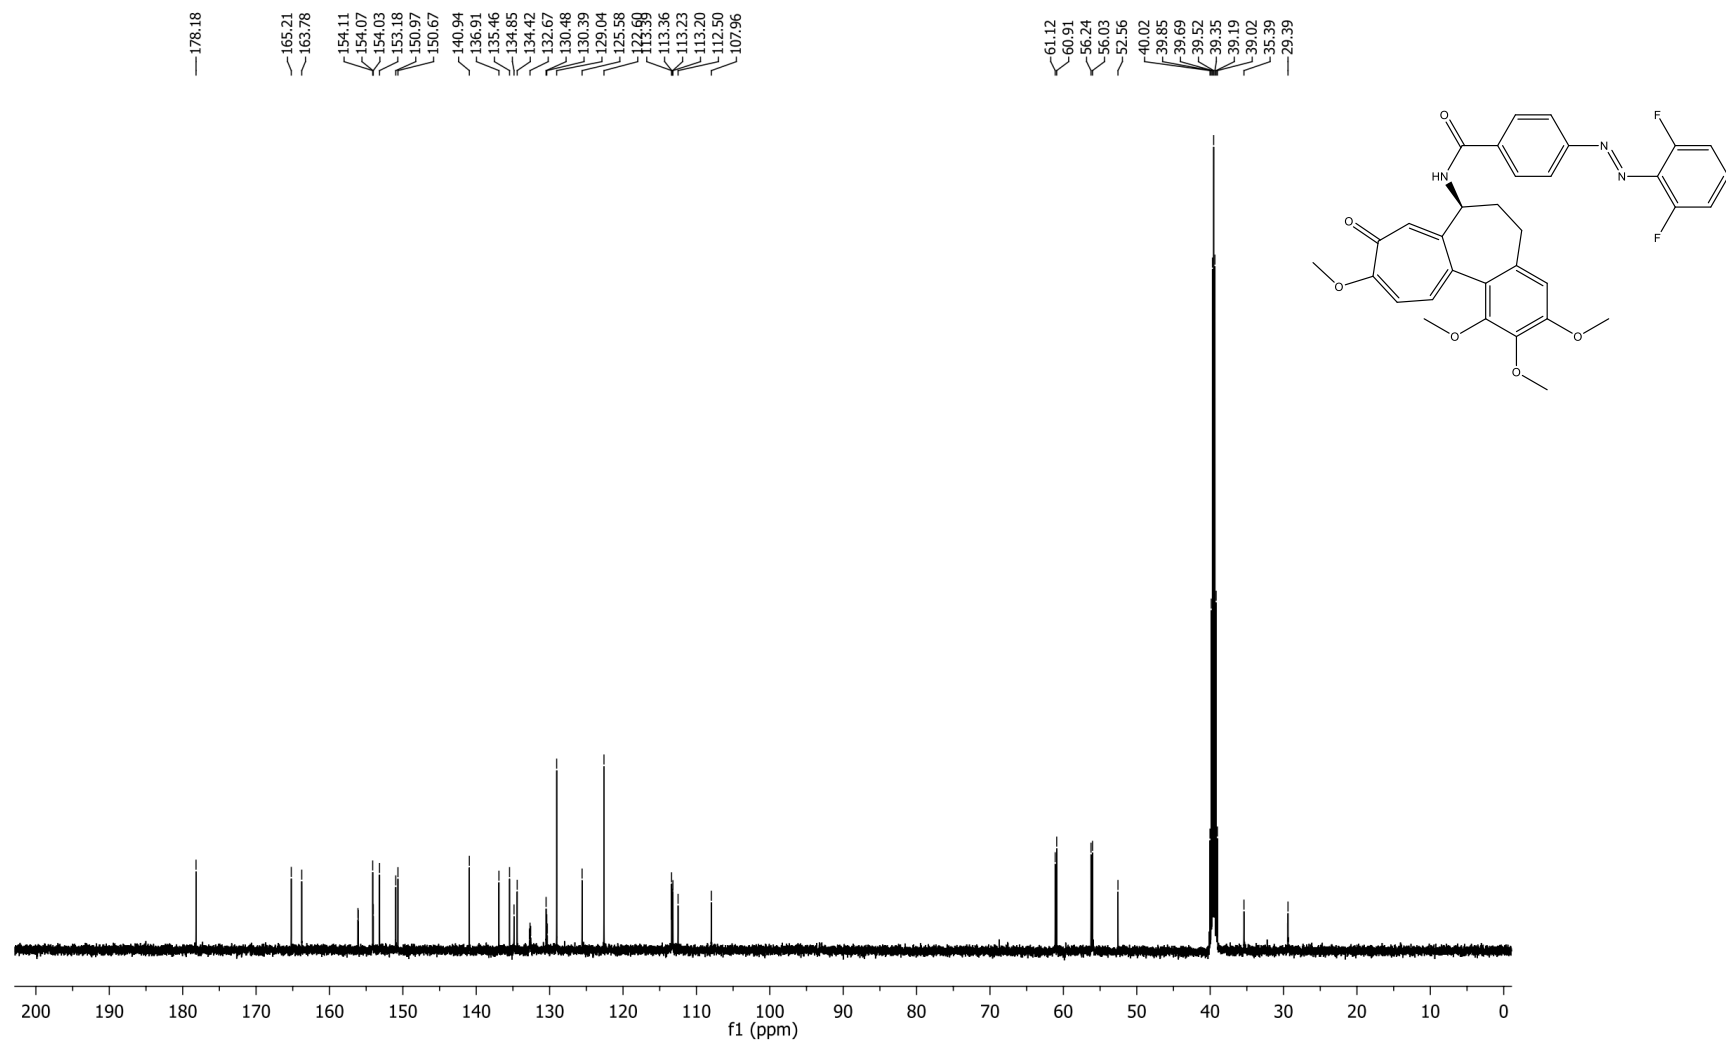

**Figure S99.**  $^{13}\text{C}$  NMR spectra of *p*-AzoCol26DF ((S,E)-4-((2,6-difluorophenyl)diazenyl)-N-(1,2,3,10-tetramethoxy-9-oxo-5,6,7,9-tetrahydrobenzo[a]heptalen-7-yl)benzamide).

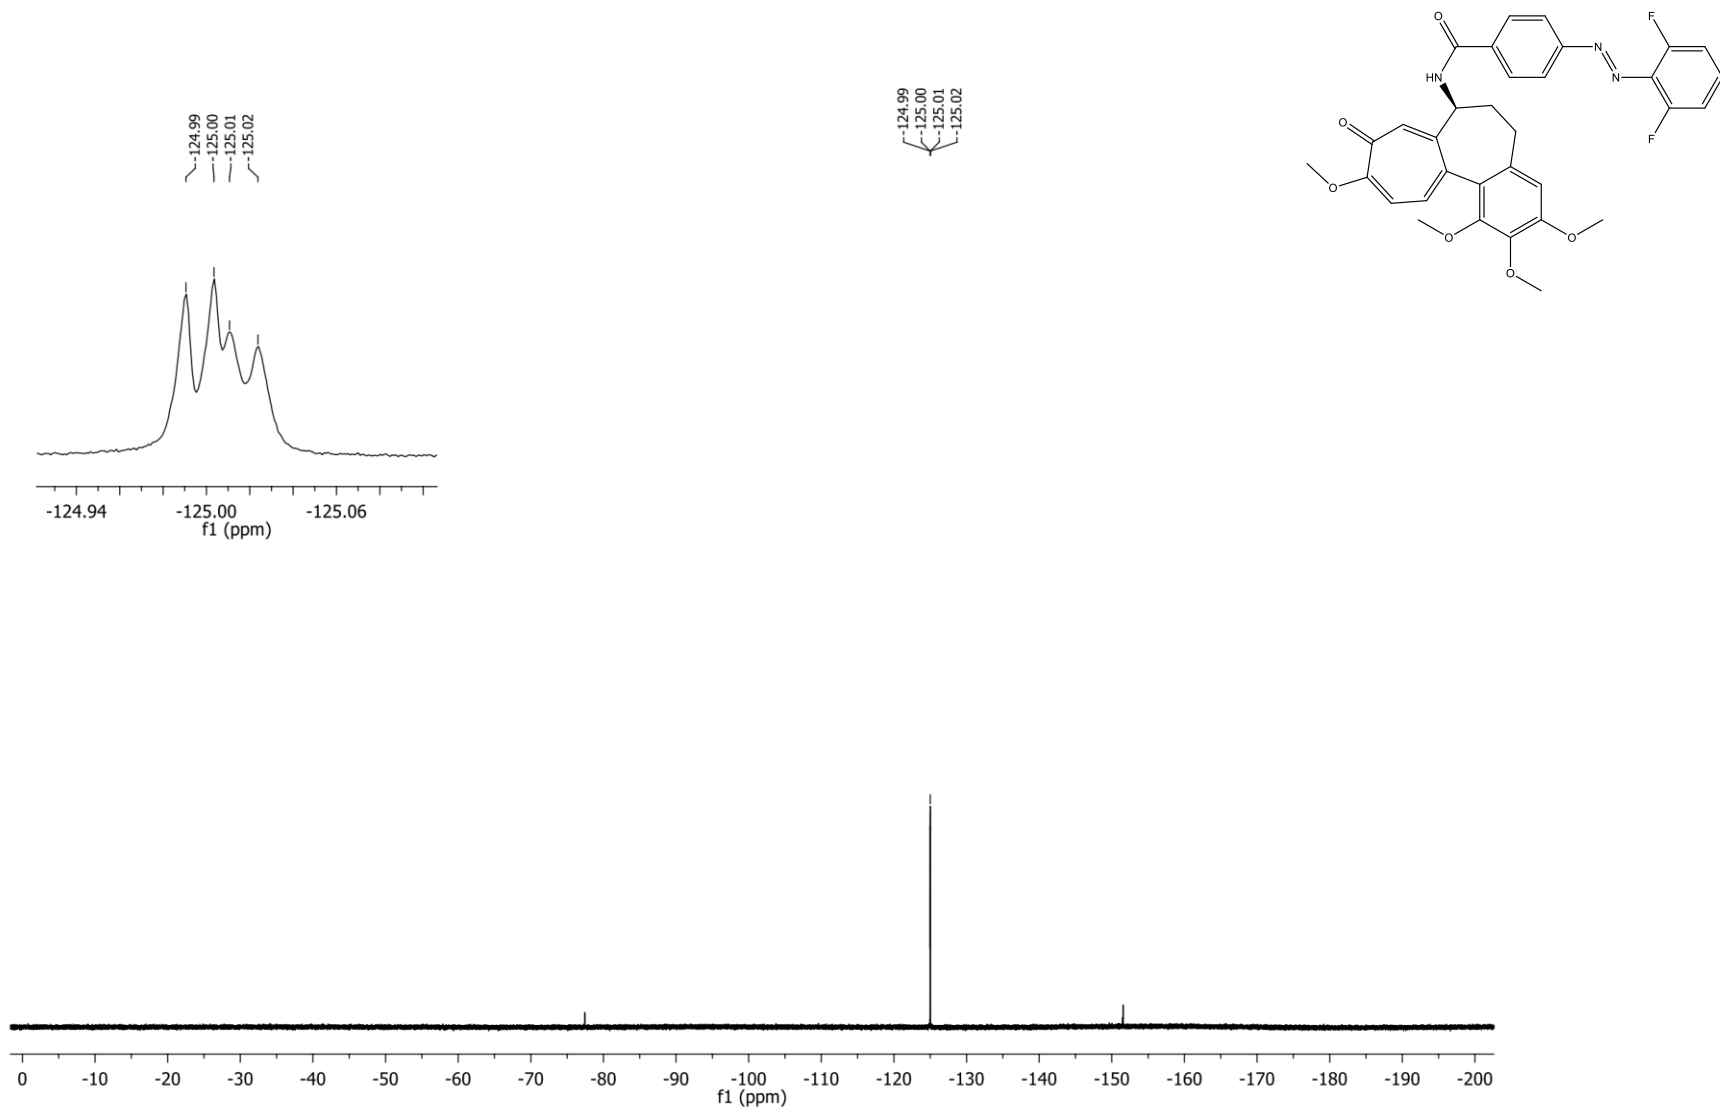

**Figure S100.**  $^{19}\text{F}$  NMR spectra of *p*-AzoCol26DF ((S,E)-4-((2,6-difluorophenyl)diazenyl)-N-(1,2,3,10-tetramethoxy-9-oxo-5,6,7,9-tetrahydrobenzo[a]heptalen-7-yl)benzamide).

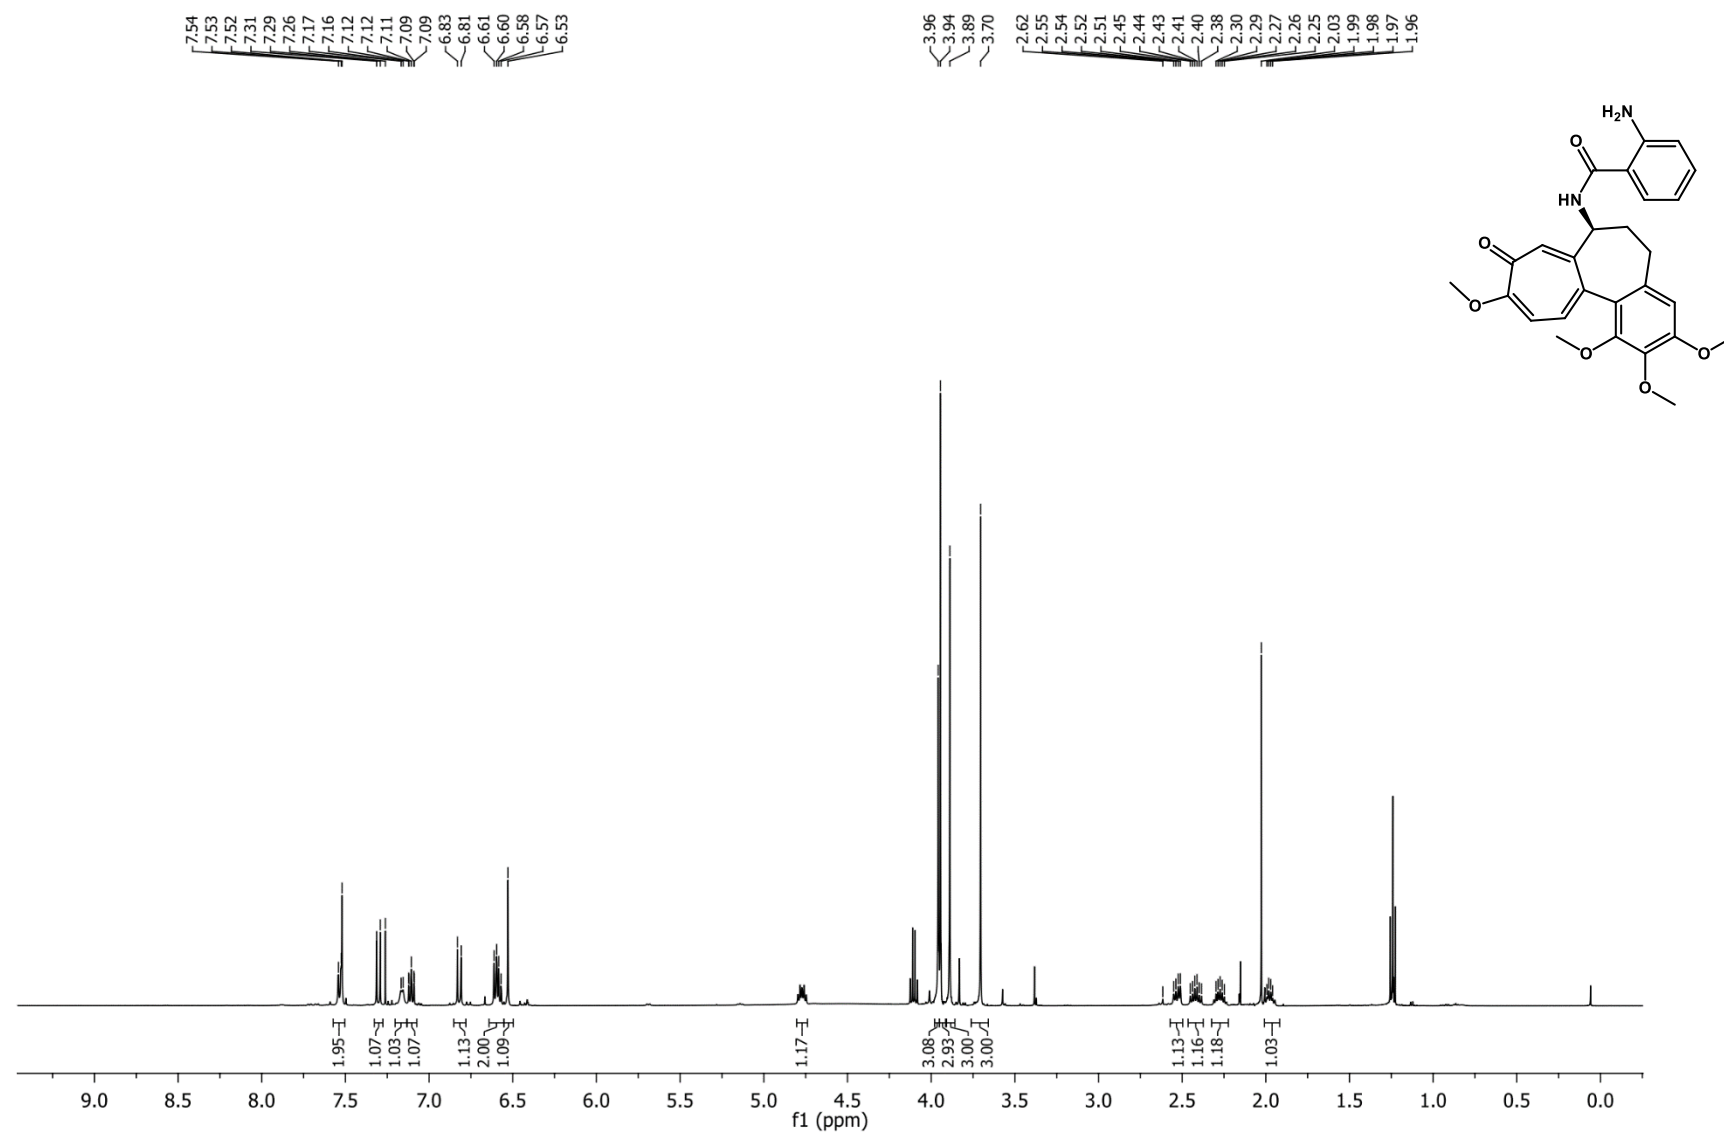

**Figure S101.** <sup>1</sup>H NMR spectra of intermediate **S1** ((S)-2-amino-N-(1,2,3,10-tetramethoxy-9-oxo-5,6,7,9-tetrahydrobenzo[a]heptalen-7-yl)benzamide).



## Computational calculations

The optimum ground-state geometry for *o*-, *m*-, *p*-**3a-d** compounds was calculated using the density functional theory (DFT). In calculation, the B3LYP functional and 6-31G\* basis set was employed and the continuum model (PCM; Gaussian 03W) [1,2] was used to simulate the effects of the solvent. HOMO and LUMO molecular orbitals for all compounds were computed. All the calculations were performed on a server equipped with a 16 quad-core XEON (R) CPU E7310 processor operating at 1.60 GHz. The operating system was Open SUSE 10.3, in DMSO as a solvent. The Avogadro program (version:1.2.0; <http://avogadro.cc/>) was used to obtain corresponding difference densities and molecular orbitals.

**Table S1.** Comparison of total energies of investigated model systems ((*E*) and (*Z*) isomers of *o*-, *m*-, *p*-**3a-d**) obtained on B3LYP/ 6-31G\* level of theory, and dihedral angle for C-N=N-C and C-C-N-N bounds and N-N bond lengths. The comparison between the (*E*) and (*Z*) configuration shows the energetic impact of the isomerization.

| Compound                  | Total Energy [au] | $\Delta$ Total Energy [au] | $\Delta$ Total Energy [kJ/mol] | C-N=N-C dihedral angle[°] |
|---------------------------|-------------------|----------------------------|--------------------------------|---------------------------|
| ( <i>E</i> )- <b>p-3d</b> | -959.787408820    | 0.016434109                | 43.38                          | -179.7                    |
| ( <i>Z</i> )- <b>p-3d</b> | -959.770974711    |                            |                                | 10.6                      |
| ( <i>E</i> )- <b>p-3c</b> | -959.794443470    | 0.02173095                 | 57.36                          | -179.8                    |
| ( <i>Z</i> )- <b>p-3c</b> | -959.772712520    |                            |                                | 11.3                      |
| ( <i>E</i> )- <b>p-3b</b> | -860.566168990    | 0.02186061                 | 57.71                          | -179.9                    |
| ( <i>Z</i> )- <b>p-3b</b> | -860.544308380    |                            |                                | 10.1                      |
| ( <i>E</i> )- <b>p-3a</b> | -761.332464486    | 0.021123026                | 55.76                          | -179.9                    |
| ( <i>Z</i> )- <b>p-3a</b> | -761.311341460    |                            |                                | 10.2                      |
| ( <i>E</i> )- <b>o-3d</b> | -959.798051057    | 0.021261267                | 56.13                          | -180.0                    |
| ( <i>Z</i> )- <b>o-3d</b> | -959.776789790    |                            |                                | 11.6                      |
| ( <i>E</i> )- <b>o-3c</b> | -959.801368527    | 0.021508987                | 56.78                          | -177.7                    |
| ( <i>Z</i> )- <b>o-3c</b> | -959.779859540    |                            |                                | 10.9                      |
| ( <i>E</i> )- <b>o-3b</b> | -860.573463907    | 0.030715255                | 81.08                          | -180.0                    |

|                  |                |             |       |        |
|------------------|----------------|-------------|-------|--------|
| (Z)- <b>o-3b</b> | -860.542748652 |             |       | 13.0   |
| (E)- <b>o-3a</b> | -761.340164832 | 0.030536116 | 80.61 | -178.0 |
| (Z)- <b>o-3a</b> | -761.309628716 |             |       | 12.7   |
| (E)- <b>m-3d</b> | -959.787663128 | 0.017419366 | 45.98 | -179.9 |
| (Z)- <b>m-3d</b> | -959.770243762 |             |       | 10.5   |
| (E)- <b>m-3c</b> | -959.794651678 | 0.021702788 | 57.29 | -179.0 |
| (Z)- <b>m-3c</b> | -959.772948890 |             |       | 9.3    |
| (E)- <b>m-3b</b> | -860.565938396 | 0.022668602 | 59.84 | -180.0 |
| (Z)- <b>m-3b</b> | -860.543269794 |             |       | 9.8    |
| (E)- <b>m-3a</b> | -761.332222055 | 0.021959282 | 57.97 | -180.0 |
| (Z)- <b>m-3a</b> | -761.310262773 |             |       | 9.7    |

**Table S2.** Energy of HOMO-LUMO orbitals of (*E*) and (*Z*) isomers for *o*-, *m*-, *p-3a-d* compounds culated using Avogadro 1.2.0 programm.

| Compound                  | Energy of HOMO-LUMO orbitals/eV |         | $\Delta E[eV]$ |
|---------------------------|---------------------------------|---------|----------------|
|                           | HOMO                            | LUMO    |                |
| ( <i>E</i> )- <b>p-3d</b> | -6.474                          | -2.801  | 3.673          |
| ( <i>Z</i> )- <b>p-3d</b> | - 6.416                         | -2.639  | 3.777          |
| ( <i>E</i> )- <b>p-3c</b> | -6.540                          | -2.801  | 3.739          |
| ( <i>Z</i> )- <b>p-3c</b> | -6.283                          | - 2.593 | 3.690          |
| ( <i>E</i> )- <b>p-3b</b> | -6.472                          | - 2.716 | 3.756          |
| ( <i>Z</i> )- <b>p-3b</b> | -6.178                          | - 2.480 | 3.698          |
| ( <i>E</i> )- <b>p-3a</b> | - 6.487                         | - 2.705 | 3.782          |

|                  |        |        |       |
|------------------|--------|--------|-------|
| (Z)- <b>p-3a</b> | -6.170 | -2.458 | 3.712 |
| (E)- <b>o-3d</b> | -6.777 | -3.054 | 3.723 |
| (Z)- <b>o-3d</b> | -6.592 | -2.995 | 3.597 |
| (E)- <b>o-3c</b> | -6.659 | -3.060 | 3.599 |
| (Z)- <b>o-3c</b> | -6.478 | -2.933 | 3.545 |
| (E)- <b>o-3b</b> | -6.625 | -2.972 | 3.653 |
| (Z)- <b>o-3b</b> | -6.121 | -2.251 | 3.870 |
| (E)- <b>o-3a</b> | -6.650 | -2.955 | 3.695 |
| (Z)- <b>o-3a</b> | -6.114 | -2.220 | 3.894 |
| (E)- <b>m-3d</b> | -6.473 | -2.661 | 3.812 |
| (Z)- <b>m-3d</b> | -6.369 | -2.523 | 3.846 |
| (E)- <b>m-3c</b> | -6.512 | -2.659 | 3.853 |
| (Z)- <b>m-3c</b> | -6.262 | -2.431 | 3.831 |
| (E)- <b>m-3b</b> | -6.447 | -2.566 | 3.881 |
| (Z)- <b>m-3b</b> | -6.140 | -2.352 | 3.788 |
| (E)- <b>m-3a</b> | -6.490 | -2.555 | 3.935 |
| (Z)- <b>m-3a</b> | -6.129 | -2.313 | 3.816 |

## Calculated Structures

### Optimized Geometries:

- The calculated coordinates of (*E*)-4-((2,6-difluorophenyl)diazenyl)benzoic acid (*E*)-***p*-3d** ( the part of calculated log file) -

#### Standard orientation:

| Center<br>Number | Atomic<br>Number | Atomic<br>Type | Coordinates (Angstroms) |           |           |
|------------------|------------------|----------------|-------------------------|-----------|-----------|
|                  |                  |                | X                       | Y         | Z         |
| 1                | 6                | 0              | -2.591099               | 0.101881  | 0.006403  |
| 2                | 7                | 0              | -1.209160               | 0.335379  | 0.015652  |
| 3                | 7                | 0              | -0.457100               | -0.678148 | -0.063156 |
| 4                | 6                | 0              | 0.926503                | -0.357777 | -0.041145 |
| 5                | 6                | 0              | 1.793934                | -1.453624 | -0.135718 |
| 6                | 6                | 0              | 3.172487                | -1.260919 | -0.117142 |
| 7                | 6                | 0              | 3.699605                | 0.033232  | -0.007888 |
| 8                | 6                | 0              | 2.824092                | 1.132032  | 0.065525  |
| 9                | 6                | 0              | 1.451363                | 0.944311  | 0.059370  |
| 10               | 6                | 0              | -3.399487               | 1.260442  | 0.027198  |
| 11               | 6                | 0              | -4.785027               | 1.222019  | 0.029460  |
| 12               | 6                | 0              | -5.416874               | -0.021738 | 0.015281  |
| 13               | 6                | 0              | -4.670151               | -1.201639 | -0.001138 |
| 14               | 6                | 0              | -3.284769               | -1.131459 | -0.006032 |
| 15               | 9                | 0              | -2.791436               | 2.456217  | 0.042787  |
| 16               | 9                | 0              | -2.601305               | -2.283183 | -0.016288 |
| 17               | 6                | 0              | 5.168757                | 0.313495  | -0.010592 |
| 18               | 8                | 0              | 5.638636                | 1.386626  | -0.327977 |
| 19               | 8                | 0              | 6.002421                | -0.691366 | 0.352270  |
| 20               | 1                | 0              | 1.367823                | -2.447777 | -0.227970 |
| 21               | 1                | 0              | 3.824120                | -2.125352 | -0.221446 |
| 22               | 1                | 0              | 3.246400                | 2.129473  | 0.131229  |
| 23               | 1                | 0              | 0.768588                | 1.783736  | 0.126661  |
| 24               | 1                | 0              | -5.343498               | 2.151719  | 0.042524  |
| 25               | 1                | 0              | -6.501316               | -0.074245 | 0.017284  |
| 26               | 1                | 0              | -5.144137               | -2.177651 | -0.008743 |
| 27               | 1                | 0              | 5.516052                | -1.441440 | 0.738661  |

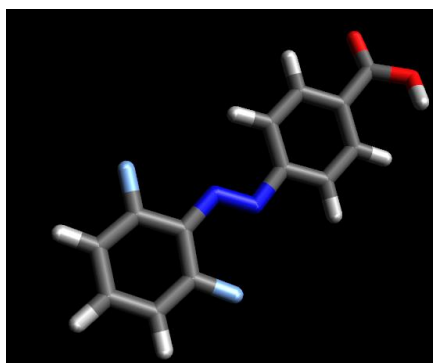

Visualization of calculated geometry of (*E*)-***p*-3d** .

- The calculated coordinates of (Z)-4-((2,6-difluorophenyl)diazenyl)benzoic acid (Z)-*p-3d* ( the part of calculated log file) -

| Standard orientation: |               |             |                         |           |           |
|-----------------------|---------------|-------------|-------------------------|-----------|-----------|
| Center Number         | Atomic Number | Atomic Type | Coordinates (Angstroms) |           |           |
|                       |               |             | X                       | Y         | Z         |
| 1                     | 6             | 0           | 2.227720                | -0.428179 | 0.057590  |
| 2                     | 7             | 0           | 1.884156                | -1.803069 | -0.163233 |
| 3                     | 7             | 0           | 0.705558                | -2.219014 | -0.153621 |
| 4                     | 6             | 0           | -0.436879               | -1.361175 | -0.142619 |
| 5                     | 6             | 0           | -1.474924               | -1.684940 | 0.739569  |
| 6                     | 6             | 0           | -2.658690               | -0.956891 | 0.710164  |
| 7                     | 6             | 0           | -2.838406               | 0.069936  | -0.229713 |
| 8                     | 6             | 0           | -1.801829               | 0.368453  | -1.126080 |
| 9                     | 6             | 0           | -0.607598               | -0.340780 | -1.091102 |
| 10                    | 6             | 0           | 1.853991                | 0.302860  | 1.194237  |
| 11                    | 6             | 0           | 2.378267                | 1.556000  | 1.478053  |
| 12                    | 6             | 0           | 3.315606                | 2.108624  | 0.603891  |
| 13                    | 6             | 0           | 3.732579                | 1.409427  | -0.531685 |
| 14                    | 6             | 0           | 3.201670                | 0.151243  | -0.767844 |
| 15                    | 9             | 0           | 0.978154                | -0.252557 | 2.054125  |
| 16                    | 9             | 0           | 3.589865                | -0.542646 | -1.853857 |
| 17                    | 6             | 0           | -4.083860               | 0.894368  | -0.309334 |
| 18                    | 8             | 0           | -4.117398               | 1.995449  | -0.818555 |
| 19                    | 8             | 0           | -5.217180               | 0.379408  | 0.225430  |
| 20                    | 1             | 0           | -1.334916               | -2.490298 | 1.453949  |
| 21                    | 1             | 0           | -3.429900               | -1.190833 | 1.440383  |
| 22                    | 1             | 0           | -1.949056               | 1.161642  | -1.851447 |
| 23                    | 1             | 0           | 0.177306                | -0.124804 | -1.808639 |
| 24                    | 1             | 0           | 2.054675                | 2.073781  | 2.374912  |
| 25                    | 1             | 0           | 3.727624                | 3.091316  | 0.810635  |
| 26                    | 1             | 0           | 4.459889                | 1.819749  | -1.224181 |
| 27                    | 1             | 0           | -5.115037               | -0.561687 | 0.454187  |

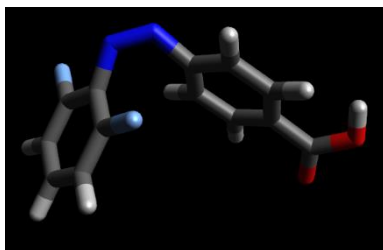

Visualization of calculated geometry of (Z)-*p-3d* :

- The calculated coordinates of (E)-4-((2,4-difluorophenyl)diazenyl)benzoic acid (E)-*p-3c* ( the part of calculated log file) -

| Standard orientation: |               |             |                         |           |           |
|-----------------------|---------------|-------------|-------------------------|-----------|-----------|
| Center Number         | Atomic Number | Atomic Type | Coordinates (Angstroms) |           |           |
|                       |               |             | X                       | Y         | Z         |
| 1                     | 6             | 0           | -2.345200               | 0.004198  | 0.002537  |
| 2                     | 7             | 0           | -0.968911               | 0.297161  | 0.014265  |
| 3                     | 7             | 0           | -0.212490               | -0.713104 | -0.038371 |
| 4                     | 6             | 0           | 1.171725                | -0.405596 | -0.029361 |
| 5                     | 6             | 0           | 2.032020                | -1.510607 | -0.068954 |
| 6                     | 6             | 0           | 3.411633                | -1.326473 | -0.057582 |
| 7                     | 6             | 0           | 3.947948                | -0.032236 | -0.011564 |
| 8                     | 6             | 0           | 3.079581                | 1.074558  | 0.005468  |
| 9                     | 6             | 0           | 1.705591                | 0.896270  | 0.006538  |
| 10                    | 6             | 0           | -3.223012               | 1.101488  | 0.063477  |

|    |   |   |           |           |           |
|----|---|---|-----------|-----------|-----------|
| 11 | 6 | 0 | -4.603004 | 0.949175  | 0.058181  |
| 12 | 6 | 0 | -5.104603 | -0.344625 | -0.010634 |
| 13 | 6 | 0 | -4.280722 | -1.470577 | -0.073009 |
| 14 | 6 | 0 | -2.906545 | -1.286214 | -0.065958 |
| 15 | 9 | 0 | -6.437474 | -0.515555 | -0.017071 |
| 16 | 9 | 0 | -2.720468 | 2.342739  | 0.128932  |
| 17 | 6 | 0 | 5.418743  | 0.238022  | -0.026359 |
| 18 | 8 | 0 | 5.895562  | 1.293204  | -0.390232 |
| 19 | 8 | 0 | 6.246150  | -0.755495 | 0.379950  |
| 20 | 1 | 0 | 1.600000  | -2.505582 | -0.112975 |
| 21 | 1 | 0 | 4.056908  | -2.199818 | -0.117780 |
| 22 | 1 | 0 | 3.508519  | 2.071145  | 0.021937  |
| 23 | 1 | 0 | 1.029297  | 1.743192  | 0.031310  |
| 24 | 1 | 0 | -5.260308 | 1.809956  | 0.105815  |
| 25 | 1 | 0 | -4.724972 | -2.459050 | -0.125575 |
| 26 | 1 | 0 | -2.231943 | -2.133664 | -0.113387 |
| 27 | 1 | 0 | 5.755157  | -1.485209 | 0.798241  |

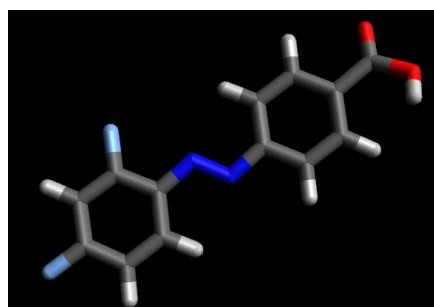

Visualization of calculated geometry of (*E*)-*p*-**3c**:

- The calculated coordinates of (*Z*)-4-((2,4-difluorophenyl)diazenyl)benzoic acid (*Z*)-*p*-**3c** ( the part of calculated log file) -

| Standard orientation: |               |             |                         |           |           |
|-----------------------|---------------|-------------|-------------------------|-----------|-----------|
| Center Number         | Atomic Number | Atomic Type | Coordinates (Angstroms) |           |           |
|                       |               |             | X                       | Y         | Z         |
| 1                     | 6             | 0           | 2.000672                | -0.771598 | -0.240259 |
| 2                     | 7             | 0           | 1.513022                | -2.115305 | -0.284695 |
| 3                     | 7             | 0           | 0.301272                | -2.406452 | -0.389059 |
| 4                     | 6             | 0           | -0.768349               | -1.464380 | -0.246486 |
| 5                     | 6             | 0           | -0.908323               | -0.676952 | 0.905504  |
| 6                     | 6             | 0           | -2.056811               | 0.088368  | 1.079801  |
| 7                     | 6             | 0           | -3.067140               | 0.094188  | 0.106369  |
| 8                     | 6             | 0           | -2.912781               | -0.693049 | -1.045268 |
| 9                     | 6             | 0           | -1.790854               | -1.495080 | -1.206238 |
| 10                    | 6             | 0           | 3.110740                | -0.529525 | 0.583657  |
| 11                    | 6             | 0           | 3.771750                | 0.688947  | 0.602481  |
| 12                    | 6             | 0           | 3.327083                | 1.672802  | -0.274634 |
| 13                    | 6             | 0           | 2.257947                | 1.472268  | -1.143943 |
| 14                    | 6             | 0           | 1.596501                | 0.248605  | -1.117639 |
| 15                    | 9             | 0           | 3.962527                | 2.857550  | -0.284197 |
| 16                    | 9             | 0           | 3.523793                | -1.503813 | 1.410907  |
| 17                    | 6             | 0           | -4.301941               | 0.929113  | 0.218035  |
| 18                    | 8             | 0           | -4.971649               | 1.252536  | -0.741182 |
| 19                    | 8             | 0           | -4.673355               | 1.345939  | 1.452979  |
| 20                    | 1             | 0           | -0.131776               | -0.674422 | 1.663429  |
| 21                    | 1             | 0           | -2.133752               | 0.707412  | 1.970742  |
| 22                    | 1             | 0           | -3.694783               | -0.680025 | -1.797079 |
| 23                    | 1             | 0           | -1.686307               | -2.139041 | -2.074607 |
| 24                    | 1             | 0           | 4.608797                | 0.860372  | 1.269994  |
| 25                    | 1             | 0           | 1.962681                | 2.260266  | -1.828464 |
| 26                    | 1             | 0           | 0.777529                | 0.069233  | -1.805060 |
| 27                    | 1             | 0           | -4.170256               | 0.894826  | 2.154279  |

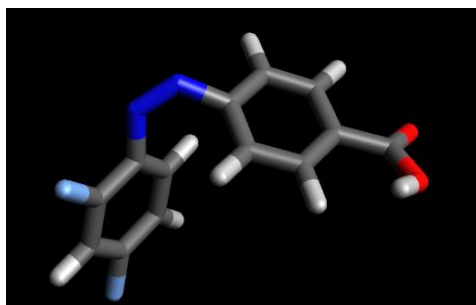

Visualization of calculated geometry of (Z)-p-3c.

- The calculated coordinates of (E)-4-((4-fluorophenyl)diazenyl)benzoic acid (E)-p-3b ( the part of calculated log file) -

| Standard orientation: |               |             |                         |           |           |
|-----------------------|---------------|-------------|-------------------------|-----------|-----------|
| Center Number         | Atomic Number | Atomic Type | Coordinates (Angstroms) |           |           |
|                       |               |             | X                       | Y         | Z         |
| 1                     | 6             | 0           | -2.524189               | 0.219205  | 0.017574  |
| 2                     | 7             | 0           | -1.134363               | 0.470944  | 0.031540  |
| 3                     | 7             | 0           | -0.402523               | -0.555128 | -0.042052 |
| 4                     | 6             | 0           | 0.990162                | -0.284467 | -0.029093 |
| 5                     | 6             | 0           | 1.820661                | -1.410712 | -0.097093 |
| 6                     | 6             | 0           | 3.204778                | -1.264757 | -0.084633 |
| 7                     | 6             | 0           | 3.776544                | 0.012865  | -0.008430 |
| 8                     | 6             | 0           | 2.938347                | 1.141741  | 0.037332  |
| 9                     | 6             | 0           | 1.559892                | 1.000770  | 0.037040  |
| 10                    | 6             | 0           | -3.341666               | 1.357183  | 0.098541  |
| 11                    | 6             | 0           | -4.728345               | 1.235779  | 0.092941  |
| 12                    | 6             | 0           | -5.276083               | -0.039481 | 0.005411  |
| 13                    | 6             | 0           | -4.490199               | -1.190811 | -0.076226 |
| 14                    | 6             | 0           | -3.108991               | -1.059110 | -0.070126 |
| 15                    | 9             | 0           | -6.616683               | -0.173165 | -0.001032 |
| 16                    | 6             | 0           | 5.253848                | 0.243639  | -0.019313 |
| 17                    | 8             | 0           | 5.759137                | 1.294628  | -0.356212 |
| 18                    | 8             | 0           | 6.054761                | -0.782151 | 0.359539  |
| 19                    | 1             | 0           | 1.361640                | -2.392260 | -0.163992 |
| 20                    | 1             | 0           | 3.825571                | -2.153815 | -0.167869 |
| 21                    | 1             | 0           | 3.394115                | 2.125711  | 0.077350  |
| 22                    | 1             | 0           | 0.907470                | 1.865340  | 0.083841  |
| 23                    | 1             | 0           | -2.868122               | 2.331947  | 0.165291  |
| 24                    | 1             | 0           | -5.379531               | 2.101630  | 0.154360  |
| 25                    | 1             | 0           | -4.970420               | -2.162163 | -0.142706 |
| 26                    | 1             | 0           | -2.466533               | -1.930288 | -0.132298 |
| 27                    | 1             | 0           | 5.544422                | -1.509216 | 0.758732  |

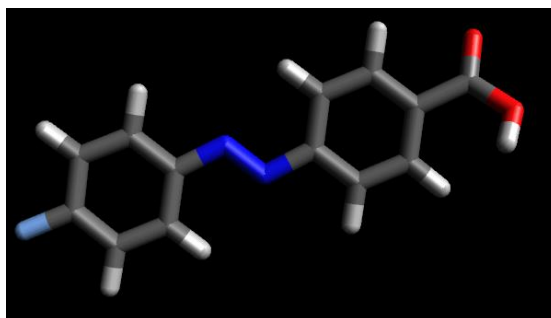

Visualization of calculated geometry of (E)-p-3b.

- The calculated coordinates of (Z)-4-((4-fluorophenyl)diazenyl)benzoic acid (Z)-**p-3b** ( the part of calculated log file) -

| Standard orientation: |               |             |                         |           |           |
|-----------------------|---------------|-------------|-------------------------|-----------|-----------|
| Center Number         | Atomic Number | Atomic Type | Coordinates (Angstroms) |           |           |
|                       |               |             | X                       | Y         | Z         |
| 1                     | 6             | 0           | -2.213984               | 0.983167  | 0.030257  |
| 2                     | 7             | 0           | -1.648260               | 2.292861  | 0.149867  |
| 3                     | 7             | 0           | -0.425428               | 2.539913  | 0.054753  |
| 4                     | 6             | 0           | 0.601983                | 1.542106  | 0.020586  |
| 5                     | 6             | 0           | 0.748702                | 0.602045  | 1.051274  |
| 6                     | 6             | 0           | 1.867069                | -0.224829 | 1.074307  |
| 7                     | 6             | 0           | 2.840151                | -0.141145 | 0.066781  |
| 8                     | 6             | 0           | 2.679882                | 0.799293  | -0.962576 |
| 9                     | 6             | 0           | 1.590374                | 1.659966  | -0.968154 |
| 10                    | 6             | 0           | -3.325200               | 0.728824  | 0.848821  |
| 11                    | 6             | 0           | -4.005394               | -0.481552 | 0.759148  |
| 12                    | 6             | 0           | -3.596761               | -1.401048 | -0.202139 |
| 13                    | 6             | 0           | -2.535229               | -1.151008 | -1.067725 |
| 14                    | 6             | 0           | -1.833754               | 0.044333  | -0.943770 |
| 15                    | 9             | 0           | -4.265107               | -2.565726 | -0.314811 |
| 16                    | 6             | 0           | 4.035674                | -1.035305 | 0.016870  |
| 17                    | 8             | 0           | 4.638771                | -1.282228 | -1.007197 |
| 18                    | 8             | 0           | 4.446848                | -1.601622 | 1.178486  |
| 19                    | 1             | 0           | -0.001471               | 0.527676  | 1.831916  |
| 20                    | 1             | 0           | 1.947928                | -0.962731 | 1.869304  |
| 21                    | 1             | 0           | 3.431316                | 0.854955  | -1.743205 |
| 22                    | 1             | 0           | 1.484180                | 2.418257  | -1.738527 |
| 23                    | 1             | 0           | -3.636902               | 1.485986  | 1.562145  |
| 24                    | 1             | 0           | -4.850600               | -0.708621 | 1.400821  |
| 25                    | 1             | 0           | -2.271560               | -1.884798 | -1.822725 |
| 26                    | 1             | 0           | -1.013220               | 0.254447  | -1.620418 |
| 27                    | 1             | 0           | 4.006084                | -1.201336 | 1.949261  |

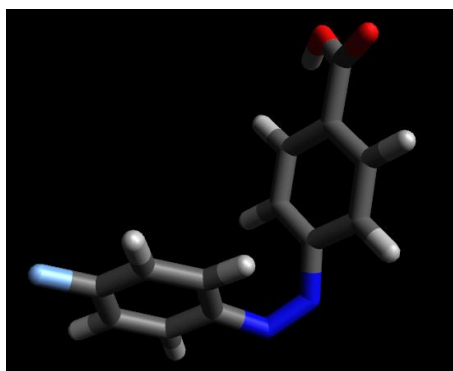

Visualization of calculated geometry of (Z)-**p-3b**.

- The calculated coordinates of (E)-4-((phenyl)diazenyl)benzoic acid (E)-**p-3a** ( the part of calculated log file) -

| Standard orientation: |               |             |                         |           |           |
|-----------------------|---------------|-------------|-------------------------|-----------|-----------|
| Center Number         | Atomic Number | Atomic Type | Coordinates (Angstroms) |           |           |
|                       |               |             | X                       | Y         | Z         |
| 1                     | 6             | 0           | 2.977072                | -0.186674 | 0.017449  |
| 2                     | 7             | 0           | 1.585863                | -0.447387 | 0.031772  |
| 3                     | 7             | 0           | 0.848088                | 0.573696  | -0.042754 |
| 4                     | 6             | 0           | -0.543451               | 0.293741  | -0.029523 |
| 5                     | 6             | 0           | -1.381329               | 1.414420  | -0.096467 |
| 6                     | 6             | 0           | -2.764498               | 1.259257  | -0.083673 |



|    |   |   |           |           |           |
|----|---|---|-----------|-----------|-----------|
| 7  | 6 | 0 | -3.327631 | -0.022241 | -0.008461 |
| 8  | 6 | 0 | -2.481969 | -1.145598 | 0.036144  |
| 9  | 6 | 0 | -1.104465 | -0.995244 | 0.035664  |
| 10 | 6 | 0 | 3.797950  | -1.320945 | 0.100442  |
| 11 | 6 | 0 | 5.184955  | -1.183525 | 0.094195  |
| 12 | 6 | 0 | 5.755538  | 0.087878  | 0.005207  |
| 13 | 6 | 0 | 4.936870  | 1.223072  | -0.077734 |
| 14 | 6 | 0 | 3.553423  | 1.093933  | -0.072298 |
| 15 | 6 | 0 | -4.803397 | -0.262545 | -0.019205 |
| 16 | 8 | 0 | -5.302076 | -1.316104 | -0.357912 |
| 17 | 8 | 0 | -5.610693 | 0.757474  | 0.361815  |
| 18 | 1 | 0 | -0.928768 | 2.399003  | -0.162839 |
| 19 | 1 | 0 | -3.391378 | 2.144126  | -0.165929 |
| 20 | 1 | 0 | -2.931145 | -2.132628 | 0.075305  |
| 21 | 1 | 0 | -0.445851 | -1.855148 | 0.081710  |
| 22 | 1 | 0 | 3.325741  | -2.296686 | 0.168612  |
| 23 | 1 | 0 | 5.818166  | -2.063893 | 0.158416  |
| 24 | 1 | 0 | 6.836535  | 0.199206  | 0.000140  |
| 25 | 1 | 0 | 5.386472  | 2.210067  | -0.146827 |
| 26 | 1 | 0 | 2.905065  | 1.960884  | -0.135929 |
| 27 | 1 | 0 | -5.104759 | 1.486782  | 0.762560  |

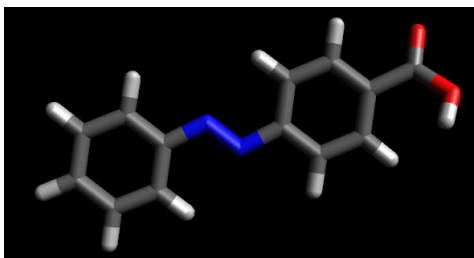

Visualization of calculated geometry of (*E*)-*p*-**3a** :

- The calculated coordinates of (*Z*)-*p*-**3a** ( the part of calculated log file) -

Standard orientation:

| Center<br>Number | Atomic<br>Number | Atomic<br>Type | Coordinates (Angstroms) |           |           |
|------------------|------------------|----------------|-------------------------|-----------|-----------|
|                  |                  |                | X                       | Y         | Z         |
| 1                | 6                | 0              | 2.581126                | 0.514092  | -0.027508 |
| 2                | 7                | 0              | 2.175533                | 1.865608  | -0.280487 |
| 3                | 7                | 0              | 0.988976                | 2.257754  | -0.234814 |
| 4                | 6                | 0              | -0.145849               | 1.388103  | -0.131725 |
| 5                | 6                | 0              | -0.377055               | 0.361278  | -1.058768 |
| 6                | 6                | 0              | -1.582779               | -0.331820 | -1.031650 |
| 7                | 6                | 0              | -2.563147               | -0.025672 | -0.075558 |
| 8                | 6                | 0              | -2.318224               | 0.999671  | 0.851006  |
| 9                | 6                | 0              | -1.136346               | 1.726482  | 0.802248  |
| 10               | 6                | 0              | 3.616083                | 0.024381  | -0.836912 |
| 11               | 6                | 0              | 4.133339                | -1.248470 | -0.607729 |
| 12               | 6                | 0              | 3.665697                | -2.010559 | 0.466553  |
| 13               | 6                | 0              | 2.673259                | -1.497378 | 1.306674  |
| 14               | 6                | 0              | 2.119676                | -0.242417 | 1.060988  |
| 15               | 6                | 0              | -3.856708               | -0.765607 | 0.029153  |
| 16               | 8                | 0              | -4.516756               | -0.808534 | 1.047071  |
| 17               | 8                | 0              | -4.296408               | -1.426376 | -1.070374 |
| 18               | 1                | 0              | 0.377432                | 0.113738  | -1.798065 |
| 19               | 1                | 0              | -1.730998               | -1.138699 | -1.745789 |
| 20               | 1                | 0              | -3.076716               | 1.227635  | 1.592501  |

|    |   |   |           |           |           |
|----|---|---|-----------|-----------|-----------|
| 21 | 1 | 0 | -0.960778 | 2.550244  | 1.488067  |
| 22 | 1 | 0 | 3.991611  | 0.646319  | -1.644594 |
| 23 | 1 | 0 | 4.915521  | -1.636950 | -1.253913 |
| 24 | 1 | 0 | 4.085357  | -2.993856 | 0.659802  |
| 25 | 1 | 0 | 2.327206  | -2.076917 | 2.158116  |
| 26 | 1 | 0 | 1.356805  | 0.156820  | 1.720736  |
| 27 | 1 | 0 | -3.786134 | -1.185087 | -1.863953 |

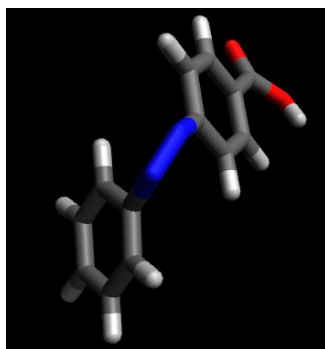

Visualization of calculated geometry of (Z)-p-3a.

- The calculated coordinates of (E)-m-3d ( the part of calculated log file) -  
Standard orientation:

| Center<br>Number | Atomic<br>Number | Atomic<br>Type | Coordinates (Angstroms) |           |           |
|------------------|------------------|----------------|-------------------------|-----------|-----------|
|                  |                  |                | X                       | Y         | Z         |
| 1                | 6                | 0              | 2.455376                | 0.040172  | -0.005531 |
| 2                | 7                | 0              | 1.168480                | 0.598807  | 0.015428  |
| 3                | 7                | 0              | 0.196408                | -0.207755 | -0.020079 |
| 4                | 6                | 0              | -1.072819               | 0.429723  | 0.007056  |
| 5                | 6                | 0              | -2.170828               | -0.437712 | -0.009888 |
| 6                | 6                | 0              | -3.474901               | 0.069148  | 0.005196  |
| 7                | 6                | 0              | -3.671704               | 1.457142  | 0.020242  |
| 8                | 6                | 0              | -2.576651               | 2.322940  | 0.048322  |
| 9                | 6                | 0              | -1.279548               | 1.819262  | 0.042481  |
| 10               | 6                | 0              | 3.518763                | 0.969292  | 0.019951  |
| 11               | 6                | 0              | 4.854374                | 0.598364  | 0.007640  |
| 12               | 6                | 0              | 5.168282                | -0.760381 | -0.030718 |
| 13               | 6                | 0              | 4.159143                | -1.725122 | -0.056410 |
| 14               | 6                | 0              | 2.831416                | -1.322986 | -0.044051 |
| 15               | 9                | 0              | 3.216936                | 2.276258  | 0.057373  |
| 16               | 9                | 0              | 1.890338                | -2.276132 | -0.067790 |
| 17               | 6                | 0              | -4.687515               | -0.807676 | -0.036332 |
| 18               | 8                | 0              | -5.776189               | -0.415850 | -0.402137 |
| 19               | 8                | 0              | -4.545144               | -2.098151 | 0.349012  |
| 20               | 1                | 0              | -1.960229               | -1.503099 | -0.063960 |
| 21               | 1                | 0              | -4.686404               | 1.841026  | 0.013592  |
| 22               | 1                | 0              | -2.739481               | 3.396771  | 0.071404  |
| 23               | 1                | 0              | -0.417672               | 2.477206  | 0.058962  |
| 24               | 1                | 0              | 5.620146                | 1.366190  | 0.028220  |
| 25               | 1                | 0              | 6.208161                | -1.072316 | -0.040625 |
| 26               | 1                | 0              | 4.383628                | -2.786276 | -0.085812 |
| 27               | 1                | 0              | -3.677500               | -2.258975 | 0.761792  |

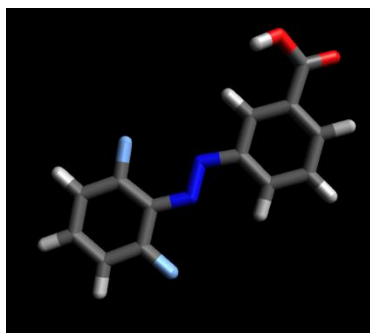

Visualization of calculated geometry of (*E*)-*m*-**3d** :

- The calculated coordinates of (*Z*)-*m*-**3d** ( the part of calculated log file) -

| Standard orientation: |                  |                |                         |           |           |  |
|-----------------------|------------------|----------------|-------------------------|-----------|-----------|--|
| Center<br>Number      | Atomic<br>Number | Atomic<br>Type | Coordinates (Angstroms) |           |           |  |
|                       |                  |                | X                       | Y         | Z         |  |
| 1                     | 6                | 0              | 2.120729                | -0.194929 | -0.521019 |  |
| 2                     | 7                | 0              | 1.498430                | -1.172791 | -1.364615 |  |
| 3                     | 7                | 0              | 0.276561                | -1.436347 | -1.327373 |  |
| 4                     | 6                | 0              | -0.608941               | -0.963141 | -0.307586 |  |
| 5                     | 6                | 0              | -0.328359               | -1.105157 | 1.060118  |  |
| 6                     | 6                | 0              | -1.292889               | -0.747927 | 2.000088  |  |
| 7                     | 6                | 0              | -2.531407               | -0.254354 | 1.589923  |  |
| 8                     | 6                | 0              | -2.823348               | -0.137504 | 0.222676  |  |
| 9                     | 6                | 0              | -1.861264               | -0.505713 | -0.722370 |  |
| 10                    | 6                | 0              | 3.372068                | -0.504306 | 0.032492  |  |
| 11                    | 6                | 0              | 4.140311                | 0.424091  | 0.717233  |  |
| 12                    | 6                | 0              | 3.672919                | 1.737042  | 0.815427  |  |
| 13                    | 6                | 0              | 2.455771                | 2.105307  | 0.240256  |  |
| 14                    | 6                | 0              | 1.705806                | 1.141225  | -0.418359 |  |
| 15                    | 9                | 0              | 3.808651                | -1.772216 | -0.081713 |  |
| 16                    | 9                | 0              | 0.550661                | 1.501950  | -1.009941 |  |
| 17                    | 6                | 0              | -4.127408               | 0.390133  | -0.292481 |  |
| 18                    | 8                | 0              | -4.258911               | 0.855973  | -1.404793 |  |
| 19                    | 8                | 0              | -5.196971               | 0.343871  | 0.536379  |  |
| 20                    | 1                | 0              | 0.623499                | -1.511819 | 1.384593  |  |
| 21                    | 1                | 0              | -1.077332               | -0.854429 | 3.058982  |  |
| 22                    | 1                | 0              | -3.251026               | 0.051115  | 2.345570  |  |
| 23                    | 1                | 0              | -2.087470               | -0.426729 | -1.780195 |  |
| 24                    | 1                | 0              | 5.085428                | 0.116582  | 1.151980  |  |
| 25                    | 1                | 0              | 4.265494                | 2.480289  | 1.339413  |  |
| 26                    | 1                | 0              | 2.084265                | 3.123661  | 0.285884  |  |
| 27                    | 1                | 0              | -5.018463               | -0.189648 | 1.331506  |  |

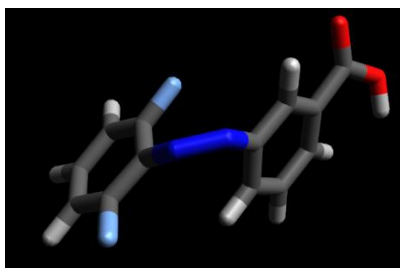

Visualization of calculated geometry of (*Z*)-*m*-**3d** :

- The calculated coordinates of (*E*)-*m*-**3c** ( the part of calculated log file) -  
Standard orientation:

| Center<br>Number | Atomic<br>Number | Atomic<br>Type | Coordinates (Angstroms) |          |           |  |
|------------------|------------------|----------------|-------------------------|----------|-----------|--|
|                  |                  |                | X                       | Y        | Z         |  |
| 1                | 6                | 0              | 2.187656                | 0.082051 | -0.003156 |  |

|    |   |   |           |           |           |
|----|---|---|-----------|-----------|-----------|
| 2  | 7 | 0 | 0.898354  | 0.648939  | 0.018389  |
| 3  | 7 | 0 | -0.046627 | -0.187126 | -0.014586 |
| 4  | 6 | 0 | -1.341609 | 0.391527  | 0.006826  |
| 5  | 6 | 0 | -2.401982 | -0.521800 | -0.006762 |
| 6  | 6 | 0 | -3.726247 | -0.070494 | 0.001709  |
| 7  | 6 | 0 | -3.981810 | 1.307949  | 0.007381  |
| 8  | 6 | 0 | -2.924500 | 2.219452  | 0.032530  |
| 9  | 6 | 0 | -1.607210 | 1.771344  | 0.032758  |
| 10 | 6 | 0 | 3.270487  | 0.978215  | 0.033305  |
| 11 | 6 | 0 | 4.590788  | 0.548671  | 0.017091  |
| 12 | 6 | 0 | 4.818817  | -0.820653 | -0.037224 |
| 13 | 6 | 0 | 3.782757  | -1.755962 | -0.075222 |
| 14 | 6 | 0 | 2.474570  | -1.295850 | -0.057831 |
| 15 | 9 | 0 | 6.089464  | -1.258882 | -0.053729 |
| 16 | 9 | 0 | 3.031921  | 2.296954  | 0.085713  |
| 17 | 6 | 0 | -4.900553 | -0.998071 | -0.038448 |
| 18 | 8 | 0 | -6.003364 | -0.654422 | -0.410181 |
| 19 | 8 | 0 | -4.705264 | -2.279232 | 0.354724  |
| 20 | 1 | 0 | -2.147108 | -1.577914 | -0.053465 |
| 21 | 1 | 0 | -5.011801 | 1.648521  | -0.004494 |
| 22 | 1 | 0 | -3.132581 | 3.285553  | 0.048188  |
| 23 | 1 | 0 | -0.774451 | 2.465776  | 0.046578  |
| 24 | 1 | 0 | 5.409366  | 1.258848  | 0.045928  |
| 25 | 1 | 0 | 4.015939  | -2.814774 | -0.117412 |
| 26 | 1 | 0 | 1.641610  | -1.989366 | -0.086083 |
| 27 | 1 | 0 | -3.833496 | -2.401032 | 0.772203  |

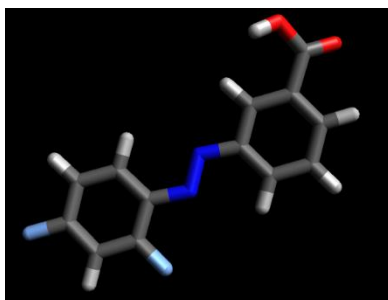

Visualization of calculated geometry of (*E*)-*m*-**3c**.

- The calculated coordinates of (*Z*)-*m*-**3c** ( the part of calculated log file) -

Standard orientation:

| Center<br>Number | Atomic<br>Number | Atomic<br>Type | Coordinates (Angstroms) |           |           |
|------------------|------------------|----------------|-------------------------|-----------|-----------|
|                  |                  |                | X                       | Y         | Z         |
| 1                | 6                | 0              | 1.677085                | -0.877702 | -0.729678 |
| 2                | 7                | 0              | 1.029265                | -1.948996 | -1.429851 |
| 3                | 7                | 0              | -0.166134               | -2.271389 | -1.250449 |
| 4                | 6                | 0              | -1.090957               | -1.502413 | -0.472785 |
| 5                | 6                | 0              | -1.926127               | -2.206241 | 0.406717  |
| 6                | 6                | 0              | -2.920733               | -1.530569 | 1.106703  |
| 7                | 6                | 0              | -3.134155               | -0.168759 | 0.884970  |
| 8                | 6                | 0              | -2.339309               | 0.525355  | -0.037638 |
| 9                | 6                | 0              | -1.300489               | -0.140248 | -0.700653 |
| 10               | 6                | 0              | 1.693580                | -0.748295 | 0.666651  |
| 11               | 6                | 0              | 2.459385                | 0.212508  | 1.310797  |
| 12               | 6                | 0              | 3.229455                | 1.061592  | 0.523818  |

|    |   |   |           |           |           |
|----|---|---|-----------|-----------|-----------|
| 13 | 6 | 0 | 3.272663  | 0.957445  | -0.863870 |
| 14 | 6 | 0 | 2.516156  | -0.036361 | -1.475900 |
| 15 | 9 | 0 | 3.971537  | 2.003954  | 1.133532  |
| 16 | 9 | 0 | 0.973274  | -1.602038 | 1.418648  |
| 17 | 6 | 0 | -2.517993 | 1.982157  | -0.337152 |
| 18 | 8 | 0 | -1.645841 | 2.669331  | -0.825741 |
| 19 | 8 | 0 | -3.712968 | 2.544933  | -0.036937 |
| 20 | 1 | 0 | -1.771121 | -3.272352 | 0.544006  |
| 21 | 1 | 0 | -3.542045 | -2.066142 | 1.818142  |
| 22 | 1 | 0 | -3.910760 | 0.340164  | 1.450911  |
| 23 | 1 | 0 | -0.689207 | 0.412653  | -1.404413 |
| 24 | 1 | 0 | 2.459130  | 0.288205  | 2.392561  |
| 25 | 1 | 0 | 3.901021  | 1.629172  | -1.438701 |
| 26 | 1 | 0 | 2.548504  | -0.166544 | -2.553572 |
| 27 | 1 | 0 | -4.381632 | 1.875366  | 0.193082  |

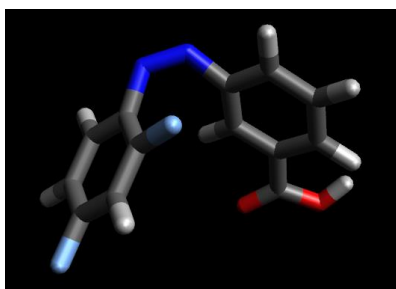

Visualization of calculated geometry of (*Z*)-*m*-**3c** :

- The calculated coordinates of (*E*)-*m*-**3b** ( the part of calculated log file) -

| Standard orientation: |               |             |                         |           |           |
|-----------------------|---------------|-------------|-------------------------|-----------|-----------|
| Center Number         | Atomic Number | Atomic Type | Coordinates (Angstroms) |           |           |
|                       |               |             | X                       | Y         | Z         |
| 1                     | 6             | 0           | 2.384942                | 0.311093  | 0.000052  |
| 2                     | 7             | 0           | 1.069316                | 0.829128  | 0.000586  |
| 3                     | 7             | 0           | 0.152808                | -0.037435 | -0.000606 |
| 4                     | 6             | 0           | -1.162883               | 0.495074  | -0.000797 |
| 5                     | 6             | 0           | -2.187883               | -0.457497 | -0.000380 |
| 6                     | 6             | 0           | -3.530057               | -0.061909 | -0.000081 |
| 7                     | 6             | 0           | -3.834317               | 1.307544  | -0.000474 |
| 8                     | 6             | 0           | -2.813782               | 2.259686  | -0.000964 |
| 9                     | 6             | 0           | -1.480108               | 1.863699  | -0.001095 |
| 10                    | 6             | 0           | 3.408768                | 1.270491  | 0.001729  |
| 11                    | 6             | 0           | 4.745460                | 0.881237  | 0.001741  |
| 12                    | 6             | 0           | 5.034111                | -0.478993 | -0.000193 |
| 13                    | 6             | 0           | 4.038459                | -1.457649 | -0.001639 |
| 14                    | 6             | 0           | 2.709090                | -1.059141 | -0.001564 |
| 15                    | 9             | 0           | 6.323467                | -0.871195 | 0.000359  |
| 16                    | 6             | 0           | -4.685603               | -1.017205 | 0.000699  |
| 17                    | 8             | 0           | -5.842272               | -0.647211 | 0.000704  |
| 18                    | 8             | 0           | -4.429455               | -2.345128 | 0.001291  |
| 19                    | 1             | 0           | -1.873595               | -1.499100 | -0.000032 |
| 20                    | 1             | 0           | -4.876669               | 1.606813  | -0.000296 |
| 21                    | 1             | 0           | -3.064020               | 3.316830  | -0.001305 |
| 22                    | 1             | 0           | -0.674583               | 2.589722  | -0.001161 |
| 23                    | 1             | 0           | 3.134928                | 2.321140  | 0.003418  |
| 24                    | 1             | 0           | 5.553146                | 1.605907  | 0.002744  |
| 25                    | 1             | 0           | 4.319357                | -2.506301 | -0.003220 |
| 26                    | 1             | 0           | 1.909155                | -1.791046 | -0.002396 |
| 27                    | 1             | 0           | -3.477165               | -2.544932 | 0.000995  |

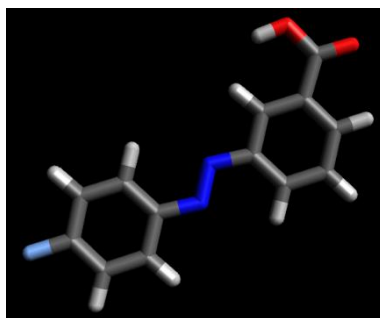

Visualization of calculated geometry of (*E*)-*m*-**3b** :

- The calculated coordinates of (*Z*)-*m*-**3b** ( the part of calculated log file) -
- 

Standard orientation:

| Center<br>Number | Atomic<br>Number | Atomic<br>Type | Coordinates (Angstroms) |           |           |
|------------------|------------------|----------------|-------------------------|-----------|-----------|
|                  |                  |                | X                       | Y         | Z         |
| 1                | 6                | 0              | 1.768658                | -1.032576 | -0.512508 |
| 2                | 7                | 0              | 1.101527                | -2.133757 | -1.141554 |
| 3                | 7                | 0              | -0.099668               | -2.428353 | -0.953253 |
| 4                | 6                | 0              | -1.030173               | -1.593655 | -0.244041 |
| 5                | 6                | 0              | -1.853212               | -2.211156 | 0.708533  |
| 6                | 6                | 0              | -2.860077               | -1.479743 | 1.333739  |
| 7                | 6                | 0              | -3.099261               | -0.155381 | 0.964604  |
| 8                | 6                | 0              | -2.316844               | 0.446476  | -0.031712 |
| 9                | 6                | 0              | -1.266631               | -0.268263 | -0.619238 |
| 10               | 6                | 0              | 1.654878                | -0.724815 | 0.853472  |
| 11               | 6                | 0              | 2.454633                | 0.268140  | 1.411365  |
| 12               | 6                | 0              | 3.344774                | 0.955115  | 0.590682  |
| 13               | 6                | 0              | 3.488929                | 0.659606  | -0.761338 |
| 14               | 6                | 0              | 2.715782                | -0.363187 | -1.302076 |
| 15               | 9                | 0              | 4.107804                | 1.926803  | 1.130379  |
| 16               | 6                | 0              | -2.523494               | 1.858504  | -0.487761 |
| 17               | 8                | 0              | -1.664804               | 2.507155  | -1.047553 |
| 18               | 8                | 0              | -3.731132               | 2.424840  | -0.251051 |
| 19               | 1                | 0              | -1.683675               | -3.254432 | 0.959720  |
| 20               | 1                | 0              | -3.470318               | -1.945782 | 2.101573  |
| 21               | 1                | 0              | -3.884105               | 0.399341  | 1.473258  |
| 22               | 1                | 0              | -0.659423               | 0.215639  | -1.375876 |
| 23               | 1                | 0              | 0.966272                | -1.274116 | 1.485468  |
| 24               | 1                | 0              | 2.396811                | 0.512909  | 2.467190  |
| 25               | 1                | 0              | 4.208597                | 1.207081  | -1.361375 |
| 26               | 1                | 0              | 2.827089                | -0.646767 | -2.344475 |
| 27               | 1                | 0              | -4.384792               | 1.769323  | 0.051263  |

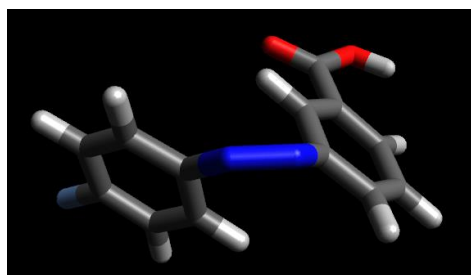

Visualization of calculated geometry of (*Z*)-*m*-**3b** :

- The calculated coordinates of (*E*)-*m*-**3a** ( the part of calculated log file) -
- Standard orientation:

| Center<br>Number | Atomic<br>Number | Atomic<br>Type | Coordinates (Angstroms) |          |          |
|------------------|------------------|----------------|-------------------------|----------|----------|
|                  |                  |                | X                       | Y        | Z        |
| 1                | 6                | 0              | 2.823798                | 0.145903 | 0.000681 |
| 2                | 7                | 0              | 1.525306                | 0.712499 | 0.002893 |

|    |   |   |           |           |           |
|----|---|---|-----------|-----------|-----------|
| 3  | 7 | 0 | 0.577958  | -0.119767 | -0.004414 |
| 4  | 6 | 0 | -0.717580 | 0.461333  | -0.003169 |
| 5  | 6 | 0 | -1.777247 | -0.452411 | -0.001538 |
| 6  | 6 | 0 | -3.103783 | -0.007068 | -0.000528 |
| 7  | 6 | 0 | -3.356909 | 1.372777  | -0.002340 |
| 8  | 6 | 0 | -2.301677 | 2.286305  | -0.004893 |
| 9  | 6 | 0 | -0.983731 | 1.840726  | -0.005002 |
| 10 | 6 | 0 | 3.878946  | 1.069513  | 0.012824  |
| 11 | 6 | 0 | 5.199936  | 0.624225  | 0.012734  |
| 12 | 6 | 0 | 5.470355  | -0.745621 | 0.000087  |
| 13 | 6 | 0 | 4.416903  | -1.670551 | -0.012729 |
| 14 | 6 | 0 | 3.097579  | -1.233993 | -0.012440 |
| 15 | 6 | 0 | -4.294283 | -0.918688 | 0.002326  |
| 16 | 8 | 0 | -5.436393 | -0.506092 | -0.006495 |
| 17 | 8 | 0 | -4.088064 | -2.255104 | 0.017724  |
| 18 | 1 | 0 | -1.501784 | -1.504945 | -0.001819 |
| 19 | 1 | 0 | -4.387480 | 1.710310  | -0.002096 |
| 20 | 1 | 0 | -2.512300 | 3.352050  | -0.005946 |
| 21 | 1 | 0 | -0.151234 | 2.535675  | -0.007789 |
| 22 | 1 | 0 | 3.638499  | 2.128646  | 0.021708  |
| 23 | 1 | 0 | 6.014973  | 1.342411  | 0.022365  |
| 24 | 1 | 0 | 6.498771  | -1.096855 | 0.000989  |
| 25 | 1 | 0 | 4.632644  | -2.735665 | -0.023241 |
| 26 | 1 | 0 | 2.270797  | -1.935705 | -0.022205 |
| 27 | 1 | 0 | -3.143928 | -2.490180 | 0.022771  |

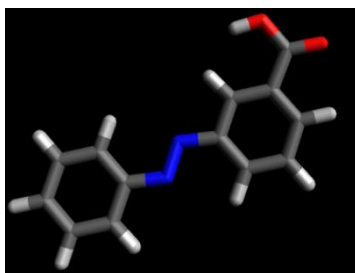

Visualization of calculated geometry of (*E*)-*m*-**3a** :

- The calculated coordinates of (*Z*)-*m*-**3a** ( the part of calculated log file) -  
Standard orientation:

| Center<br>Number | Atomic<br>Number | Atomic<br>Type | Coordinates (Angstroms) |           |           |
|------------------|------------------|----------------|-------------------------|-----------|-----------|
|                  |                  |                | X                       | Y         | Z         |
| 1                | 6                | 0              | -2.185016               | 0.518535  | -0.386816 |
| 2                | 7                | 0              | -1.742056               | 1.610403  | -1.204917 |
| 3                | 7                | 0              | -0.593801               | 2.102951  | -1.153261 |
| 4                | 6                | 0              | 0.496034                | 1.520253  | -0.418342 |
| 5                | 6                | 0              | 1.268480                | 2.381548  | 0.373775  |
| 6                | 6                | 0              | 2.410981                | 1.901715  | 1.009092  |
| 7                | 6                | 0              | 2.830594                | 0.587151  | 0.801324  |
| 8                | 6                | 0              | 2.094196                | -0.258862 | -0.040664 |
| 9                | 6                | 0              | 0.912171                | 0.203291  | -0.631157 |
| 10               | 6                | 0              | -1.976616               | 0.461503  | 0.999982  |
| 11               | 6                | 0              | -2.571643               | -0.556998 | 1.741712  |
| 12               | 6                | 0              | -3.354587               | -1.527911 | 1.110849  |
| 13               | 6                | 0              | -3.571155               | -1.460673 | -0.268205 |
| 14               | 6                | 0              | -3.014292               | -0.423034 | -1.012257 |
| 15               | 6                | 0              | 2.492585                | -1.675286 | -0.322660 |
| 16               | 8                | 0              | 1.716741                | -2.515141 | -0.727689 |
| 17               | 8                | 0              | 3.784913                | -2.019860 | -0.105171 |
| 18               | 1                | 0              | 0.954559                | 3.414432  | 0.495785  |
| 19               | 1                | 0              | 2.985556                | 2.556794  | 1.657113  |
| 20               | 1                | 0              | 3.720263                | 0.231719  | 1.315540  |
| 21               | 1                | 0              | 0.342945                | -0.468014 | -1.264039 |
| 22               | 1                | 0              | -1.378174               | 1.218994  | 1.494670  |
| 23               | 1                | 0              | -2.421888               | -0.592441 | 2.817330  |

|    |   |   |           |           |           |
|----|---|---|-----------|-----------|-----------|
| 24 | 1 | 0 | -3.807644 | -2.324114 | 1.694904  |
| 25 | 1 | 0 | -4.191235 | -2.204388 | -0.760889 |
| 26 | 1 | 0 | -3.201550 | -0.333893 | -2.078672 |
| 27 | 1 | 0 | 4.344550  | -1.239953 | 0.058582  |

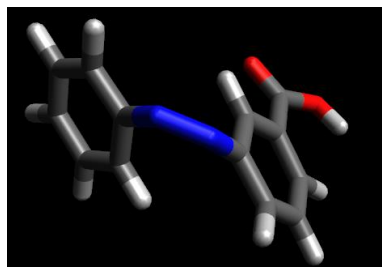

Visualization of calculated geometry of (Z)-*m*-**3a**.

- The calculated coordinates of (*E*)-*o*-**3d** ( the part of calculated log file) -  
Standard orientation:

| Center<br>Number | Atomic<br>Number | Atomic<br>Type | Coordinates (Angstroms) |           |           |
|------------------|------------------|----------------|-------------------------|-----------|-----------|
|                  |                  |                | X                       | Y         | Z         |
| 1                | 6                | 0              | 1.967687                | 0.234929  | 0.000029  |
| 2                | 7                | 0              | 0.682487                | 0.778086  | 0.000065  |
| 3                | 7                | 0              | -0.299623               | -0.015872 | -0.000201 |
| 4                | 6                | 0              | -1.577289               | 0.597551  | -0.000306 |
| 5                | 6                | 0              | -2.705430               | -0.260316 | 0.000245  |
| 6                | 6                | 0              | -3.981610               | 0.317388  | 0.000062  |
| 7                | 6                | 0              | -4.148285               | 1.698691  | -0.000741 |
| 8                | 6                | 0              | -3.027179               | 2.537635  | -0.001319 |
| 9                | 6                | 0              | -1.750694               | 1.992077  | -0.001083 |
| 10               | 6                | 0              | 3.019760                | 1.180780  | 0.000937  |
| 11               | 6                | 0              | 4.358850                | 0.824458  | 0.000908  |
| 12               | 6                | 0              | 4.688666                | -0.530993 | -0.000134 |
| 13               | 6                | 0              | 3.692967                | -1.511490 | -0.001098 |
| 14               | 6                | 0              | 2.363960                | -1.123436 | -0.000975 |
| 15               | 9                | 0              | 2.699663                | 2.480846  | 0.001904  |
| 16               | 9                | 0              | 1.429594                | -2.089450 | -0.001943 |
| 17               | 6                | 0              | -2.663386               | -1.773347 | 0.001031  |
| 18               | 8                | 0              | -3.689192               | -2.431499 | 0.002007  |
| 19               | 8                | 0              | -1.472922               | -2.378758 | 0.000535  |
| 20               | 1                | 0              | -4.837453               | -0.348148 | 0.000546  |
| 21               | 1                | 0              | -5.148029               | 2.123466  | -0.000934 |
| 22               | 1                | 0              | -3.152558               | 3.616863  | -0.001982 |
| 23               | 1                | 0              | -0.869252               | 2.622780  | -0.001531 |
| 24               | 1                | 0              | 5.116066                | 1.600912  | 0.001698  |
| 25               | 1                | 0              | 5.732353                | -0.829815 | -0.000195 |
| 26               | 1                | 0              | 3.931681                | -2.569825 | -0.001957 |
| 27               | 1                | 0              | -0.747349               | -1.695794 | -0.000016 |

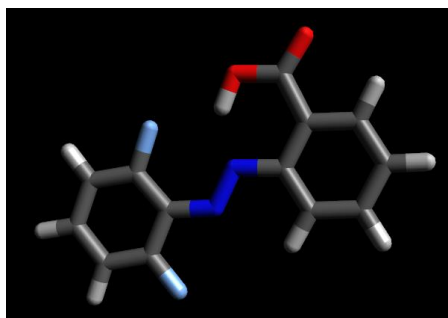

Visualization of calculated geometry of (*E*)-*o*-**3d**



- The calculated coordinates of (Z)-*o*-**3d** ( the part of calculated log file) -

Standard orientation:

| Center<br>Number | Atomic<br>Number | Atomic<br>Type | Coordinates (Angstroms) |           |           |
|------------------|------------------|----------------|-------------------------|-----------|-----------|
|                  |                  |                | X                       | Y         | Z         |
| 1                | 6                | 0              | -1.706787               | -0.557049 | -0.053240 |
| 2                | 7                | 0              | -0.766926               | -1.476983 | -0.600335 |
| 3                | 7                | 0              | 0.449829                | -1.218549 | -0.751983 |
| 4                | 6                | 0              | 1.058798                | 0.065068  | -0.637667 |
| 5                | 6                | 0              | 0.471263                | 1.217652  | -1.179519 |
| 6                | 6                | 0              | 1.162453                | 2.425443  | -1.161743 |
| 7                | 6                | 0              | 2.436557                | 2.497055  | -0.592279 |
| 8                | 6                | 0              | 3.030845                | 1.347864  | -0.076429 |
| 9                | 6                | 0              | 2.374651                | 0.113237  | -0.119183 |
| 10               | 6                | 0              | -2.994657               | -0.526583 | -0.612869 |
| 11               | 6                | 0              | -4.037428               | 0.192880  | -0.051179 |
| 12               | 6                | 0              | -3.812601               | 0.871134  | 1.149045  |
| 13               | 6                | 0              | -2.562246               | 0.831938  | 1.769768  |
| 14               | 6                | 0              | -1.536581               | 0.121903  | 1.165454  |
| 15               | 9                | 0              | -3.191207               | -1.196136 | -1.761006 |
| 16               | 9                | 0              | -0.341613               | 0.041807  | 1.779496  |
| 17               | 6                | 0              | 3.142772                | -1.075892 | 0.407405  |
| 18               | 8                | 0              | 4.170047                | -0.938148 | 1.044288  |
| 19               | 8                | 0              | 2.682650                | -2.301789 | 0.120981  |
| 20               | 1                | 0              | -0.508054               | 1.160131  | -1.641019 |
| 21               | 1                | 0              | 0.705401                | 3.309703  | -1.596472 |
| 22               | 1                | 0              | 2.970799                | 3.442149  | -0.566091 |
| 23               | 1                | 0              | 4.024455                | 1.379471  | 0.356759  |
| 24               | 1                | 0              | -5.002307               | 0.206681  | -0.546713 |
| 25               | 1                | 0              | -4.621048               | 1.431295  | 1.608097  |
| 26               | 1                | 0              | -2.373754               | 1.333051  | 2.713397  |
| 27               | 1                | 0              | 1.835760                | -2.233196 | -0.395671 |

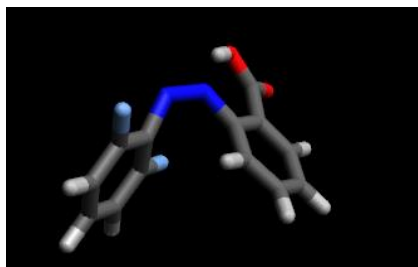

Visualization of calculated geometry of (Z)-*o*-**3d**.

- The calculated coordinates of (E)-*o*-**3c** ( the part of calculated log file) -

Standard orientation:

| Center<br>Number | Atomic<br>Number | Atomic<br>Type | Coordinates (Angstroms) |           |           |
|------------------|------------------|----------------|-------------------------|-----------|-----------|
|                  |                  |                | X                       | Y         | Z         |
| 1                | 6                | 0              | -1.690258               | -0.267964 | -0.049518 |
| 2                | 7                | 0              | -0.395147               | -0.799547 | -0.029601 |
| 3                | 7                | 0              | 0.549178                | 0.037370  | -0.034935 |
| 4                | 6                | 0              | 1.859993                | -0.501075 | -0.066024 |
| 5                | 6                | 0              | 2.942596                | 0.410058  | 0.025539  |
| 6                | 6                | 0              | 4.247081                | -0.098175 | -0.015186 |
| 7                | 6                | 0              | 4.486352                | -1.462925 | -0.142511 |
| 8                | 6                | 0              | 3.410782                | -2.354372 | -0.234071 |
| 9                | 6                | 0              | 2.107166                | -1.877740 | -0.198272 |
| 10               | 6                | 0              | -2.737662               | -1.179626 | 0.190806  |

|    |   |   |           |           |           |
|----|---|---|-----------|-----------|-----------|
| 11 | 6 | 0 | -4.070350 | -0.795050 | 0.189668  |
| 12 | 6 | 0 | -4.352316 | 0.539330  | -0.076982 |
| 13 | 6 | 0 | -3.356668 | 1.483165  | -0.340467 |
| 14 | 6 | 0 | -2.033335 | 1.072126  | -0.324687 |
| 15 | 9 | 0 | -5.634579 | 0.932135  | -0.090755 |
| 16 | 9 | 0 | -2.443436 | -2.459898 | 0.446115  |
| 17 | 6 | 0 | 2.821573  | 1.910953  | 0.170402  |
| 18 | 8 | 0 | 3.805742  | 2.626289  | 0.217322  |
| 19 | 8 | 0 | 1.594281  | 2.439666  | 0.251678  |
| 20 | 1 | 0 | 5.066757  | 0.607962  | 0.055826  |
| 21 | 1 | 0 | 5.506970  | -1.833390 | -0.172651 |
| 22 | 1 | 0 | 3.592105  | -3.420605 | -0.337169 |
| 23 | 1 | 0 | 1.260678  | -2.550481 | -0.273310 |
| 24 | 1 | 0 | -4.858758 | -1.512230 | 0.388110  |
| 25 | 1 | 0 | -3.632727 | 2.508593  | -0.561930 |
| 26 | 1 | 0 | -1.246822 | 1.782225  | -0.552751 |
| 27 | 1 | 0 | 0.925796  | 1.703163  | 0.183197  |

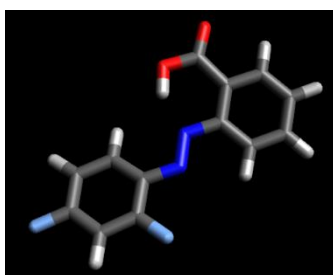

Visualization of calculated geometry of (*E*)-*o*-**3c**

- The calculated coordinates of (*Z*)-*o*-**3c** ( the part of calculated log file) -  
Standard orientation:

| Center<br>Number | Atomic<br>Number | Atomic<br>Type | Coordinates (Angstroms) |           |           |
|------------------|------------------|----------------|-------------------------|-----------|-----------|
|                  |                  |                | X                       | Y         | Z         |
| 1                | 6                | 0              | -1.487096               | -0.902868 | -0.492399 |
| 2                | 7                | 0              | -0.373817               | -1.648708 | -0.975532 |
| 3                | 7                | 0              | 0.811593                | -1.239421 | -0.959007 |
| 4                | 6                | 0              | 1.245647                | 0.088292  | -0.672531 |
| 5                | 6                | 0              | 0.585956                | 1.213556  | -1.188811 |
| 6                | 6                | 0              | 1.124652                | 2.483116  | -1.002060 |
| 7                | 6                | 0              | 2.315101                | 2.643431  | -0.287760 |
| 8                | 6                | 0              | 2.984077                | 1.525021  | 0.202801  |
| 9                | 6                | 0              | 2.485743                | 0.234444  | -0.006745 |
| 10               | 6                | 0              | -1.531281               | -0.256672 | 0.754631  |
| 11               | 6                | 0              | -2.692967               | 0.316834  | 1.246901  |
| 12               | 6                | 0              | -3.839072               | 0.237666  | 0.461982  |
| 13               | 6                | 0              | -3.858371               | -0.415570 | -0.767966 |
| 14               | 6                | 0              | -2.685595               | -1.010541 | -1.217854 |
| 15               | 9                | 0              | -4.969421               | 0.798422  | 0.922791  |
| 16               | 9                | 0              | -0.424890               | -0.219726 | 1.518663  |
| 17               | 6                | 0              | 3.333080                | -0.905075 | 0.507184  |
| 18               | 8                | 0              | 4.272629                | -0.713192 | 1.256101  |
| 19               | 8                | 0              | 3.048693                | -2.143876 | 0.081686  |
| 20               | 1                | 0              | -0.327880               | 1.090269  | -1.759113 |
| 21               | 1                | 0              | 0.613304                | 3.347332  | -1.416314 |
| 22               | 1                | 0              | 2.728429                | 3.635239  | -0.130164 |
| 23               | 1                | 0              | 3.917894                | 1.625918  | 0.744961  |
| 24               | 1                | 0              | -2.703466               | 0.802361  | 2.216512  |
| 25               | 1                | 0              | -4.779089               | -0.470141 | -1.338621 |
| 26               | 1                | 0              | -2.669659               | -1.555868 | -2.156610 |
| 27               | 1                | 0              | 2.255007                | -2.119738 | -0.518493 |

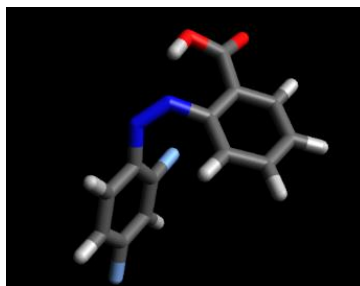

Visualization of calculated geometry of (Z)-o-**3c**

- The calculated coordinates of (E)-o-**3b** ( the part of calculated log file) -  
Standard orientation:

| Center<br>Number | Atomic<br>Number | Atomic<br>Type | Coordinates (Angstroms) |           |           |
|------------------|------------------|----------------|-------------------------|-----------|-----------|
|                  |                  |                | X                       | Y         | Z         |
| 1                | 6                | 0              | 1.839291                | -0.485684 | 0.000312  |
| 2                | 7                | 0              | 0.513196                | -0.951617 | -0.000064 |
| 3                | 7                | 0              | -0.399682               | -0.081552 | 0.000196  |
| 4                | 6                | 0              | -1.731089               | -0.574318 | 0.000256  |
| 5                | 6                | 0              | -2.781845               | 0.377881  | -0.000249 |
| 6                | 6                | 0              | -4.103686               | -0.085764 | -0.000174 |
| 7                | 6                | 0              | -4.391560               | -1.446784 | 0.000489  |
| 8                | 6                | 0              | -3.347594               | -2.379430 | 0.001040  |
| 9                | 6                | 0              | -2.027906               | -1.947455 | 0.000993  |
| 10               | 6                | 0              | 2.812579                | -1.500418 | -0.002112 |
| 11               | 6                | 0              | 4.167268                | -1.186815 | -0.002312 |
| 12               | 6                | 0              | 4.530407                | 0.155830  | 0.000306  |
| 13               | 6                | 0              | 3.589734                | 1.188442  | 0.002770  |
| 14               | 6                | 0              | 2.241074                | 0.865991  | 0.002848  |
| 15               | 9                | 0              | 5.835612                | 0.476614  | -0.000434 |
| 16               | 6                | 0              | -2.609689               | 1.880352  | -0.000769 |
| 17               | 8                | 0              | -3.568747               | 2.630917  | -0.000923 |
| 18               | 8                | 0              | -1.364023               | 2.369822  | -0.001687 |
| 19               | 1                | 0              | -4.897473               | 0.652762  | -0.000579 |
| 20               | 1                | 0              | -5.424568               | -1.782416 | 0.000483  |
| 21               | 1                | 0              | -3.565807               | -3.443756 | 0.001703  |
| 22               | 1                | 0              | -1.206418               | -2.654299 | 0.001445  |
| 23               | 1                | 0              | 2.480781                | -2.533920 | -0.004097 |
| 24               | 1                | 0              | 4.933153                | -1.955329 | -0.004006 |
| 25               | 1                | 0              | 3.927205                | 2.219972  | 0.004970  |
| 26               | 1                | 0              | 1.502863                | 1.659227  | 0.005009  |
| 27               | 1                | 0              | -0.724572               | 1.603527  | -0.001463 |

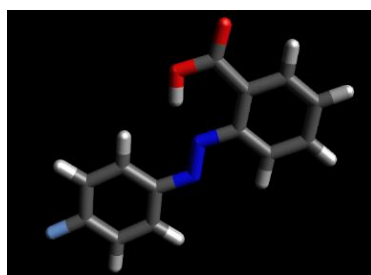

Visualization of calculated geometry of (E)-o-**3b** :

- The calculated coordinates of (Z)-o-**3b** ( the part of calculated log file) -

Standard orientation:

| Center<br>Number | Atomic<br>Number | Atomic<br>Type | Coordinates (Angstroms) |           |          |
|------------------|------------------|----------------|-------------------------|-----------|----------|
|                  |                  |                | X                       | Y         | Z        |
| 1                | 6                | 0              | 1.456832                | -0.602201 | 0.855844 |
| 2                | 7                | 0              | 0.440692                | -1.039750 | 1.765802 |

|    |   |   |           |           |           |
|----|---|---|-----------|-----------|-----------|
| 3  | 7 | 0 | -0.758414 | -0.715442 | 1.641472  |
| 4  | 6 | 0 | -1.216345 | 0.325517  | 0.762508  |
| 5  | 6 | 0 | -0.809059 | 1.643194  | 1.006996  |
| 6  | 6 | 0 | -1.413583 | 2.701901  | 0.331431  |
| 7  | 6 | 0 | -2.433373 | 2.462327  | -0.591741 |
| 8  | 6 | 0 | -2.854019 | 1.154673  | -0.824621 |
| 9  | 6 | 0 | -2.266186 | 0.077922  | -0.146317 |
| 10 | 6 | 0 | 2.691856  | -0.239321 | 1.410930  |
| 11 | 6 | 0 | 3.752164  | 0.118463  | 0.583310  |
| 12 | 6 | 0 | 3.572645  | 0.045785  | -0.795121 |
| 13 | 6 | 0 | 2.375126  | -0.369825 | -1.369519 |
| 14 | 6 | 0 | 1.305736  | -0.689217 | -0.536862 |
| 15 | 9 | 0 | 4.603740  | 0.368775  | -1.603136 |
| 16 | 6 | 0 | -2.647539 | -1.330203 | -0.453246 |
| 17 | 8 | 0 | -1.858464 | -2.254193 | -0.431366 |
| 18 | 8 | 0 | -3.934386 | -1.564373 | -0.800657 |
| 19 | 1 | 0 | -0.031281 | 1.831940  | 1.740515  |
| 20 | 1 | 0 | -1.082838 | 3.717973  | 0.527838  |
| 21 | 1 | 0 | -2.895301 | 3.285314  | -1.128221 |
| 22 | 1 | 0 | -3.625037 | 0.966818  | -1.568130 |
| 23 | 1 | 0 | 2.804932  | -0.223600 | 2.491007  |
| 24 | 1 | 0 | 4.709828  | 0.429822  | 0.987968  |
| 25 | 1 | 0 | 2.292956  | -0.443585 | -2.449349 |
| 26 | 1 | 0 | 0.373048  | -1.051601 | -0.955254 |
| 27 | 1 | 0 | -4.498662 | -0.791264 | -0.614424 |

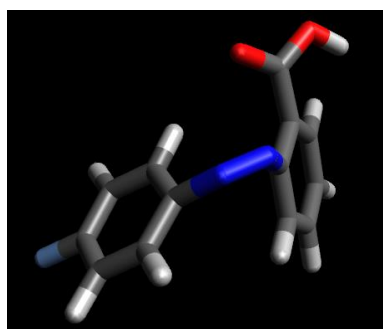

Visualization of calculated geometry of (Z)-o-**3b**

- The calculated coordinates of (E)-o-**3a** ( the part of calculated log file) -

| Standard orientation: |               |             |                         |           |           |
|-----------------------|---------------|-------------|-------------------------|-----------|-----------|
| Center Number         | Atomic Number | Atomic Type | Coordinates (Angstroms) |           |           |
|                       |               |             | X                       | Y         | Z         |
| 1                     | 6             | 0           | 2.243248                | -0.414383 | 0.014171  |
| 2                     | 7             | 0           | 0.929973                | -0.924448 | -0.019482 |
| 3                     | 7             | 0           | 0.000350                | -0.074626 | 0.028491  |
| 4                     | 6             | 0           | -1.322112               | -0.587498 | 0.038872  |
| 5                     | 6             | 0           | -2.384277               | 0.348933  | -0.027596 |
| 6                     | 6             | 0           | -3.699755               | -0.131601 | -0.006967 |
| 7                     | 6             | 0           | -3.968797               | -1.494045 | 0.078702  |
| 8                     | 6             | 0           | -2.913008               | -2.410747 | 0.147185  |
| 9                     | 6             | 0           | -1.599112               | -1.961471 | 0.129352  |
| 10                    | 6             | 0           | 3.245188                | -1.340710 | -0.317804 |
| 11                    | 6             | 0           | 4.582097                | -0.950584 | -0.327901 |
| 12                    | 6             | 0           | 4.925668                | 0.358810  | 0.015859  |
| 13                    | 6             | 0           | 3.929956                | 1.278778  | 0.371899  |
| 14                    | 6             | 0           | 2.592662                | 0.901941  | 0.372246  |
| 15                    | 6             | 0           | -2.229093               | 1.850475  | -0.126915 |
| 16                    | 8             | 0           | -3.197771               | 2.587616  | -0.165914 |
| 17                    | 8             | 0           | -0.990345               | 2.355081  | -0.174733 |
| 18                    | 1             | 0           | -4.503692               | 0.593964  | -0.059934 |

|    |   |   |           |           |           |
|----|---|---|-----------|-----------|-----------|
| 19 | 1 | 0 | -4.997238 | -1.843211 | 0.094785  |
| 20 | 1 | 0 | -3.117681 | -3.475401 | 0.218362  |
| 21 | 1 | 0 | -0.767480 | -2.654272 | 0.187124  |
| 22 | 1 | 0 | 2.948986  | -2.353502 | -0.574072 |
| 23 | 1 | 0 | 5.353913  | -1.666305 | -0.595624 |
| 24 | 1 | 0 | 5.968533  | 0.663720  | 0.019118  |
| 25 | 1 | 0 | 4.203856  | 2.290817  | 0.656514  |
| 26 | 1 | 0 | 1.824406  | 1.606484  | 0.671662  |
| 27 | 1 | 0 | -0.336924 | 1.602263  | -0.122449 |

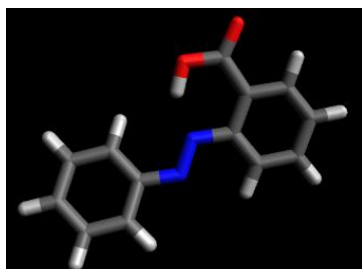

Visualization of calculated geometry of (*E*)-**o-3a**

- The calculated coordinates of (*Z*)-**o-3a** ( the part of calculated log file) -

Standard orientation:

| Center<br>Number | Atomic<br>Number | Atomic<br>Type | Coordinates (Angstroms) |           |           |
|------------------|------------------|----------------|-------------------------|-----------|-----------|
|                  |                  |                | X                       | Y         | Z         |
| 1                | 6                | 0              | -1.854628               | -0.509905 | -0.574912 |
| 2                | 7                | 0              | -0.951355               | -0.923489 | -1.609539 |
| 3                | 7                | 0              | 0.260659                | -0.625614 | -1.602046 |
| 4                | 6                | 0              | 0.829576                | 0.363259  | -0.726894 |
| 5                | 6                | 0              | 0.416137                | 1.695779  | -0.850433 |
| 6                | 6                | 0              | 1.104238                | 2.708839  | -0.185305 |
| 7                | 6                | 0              | 2.213524                | 2.407830  | 0.607556  |
| 8                | 6                | 0              | 2.640240                | 1.086156  | 0.717118  |
| 9                | 6                | 0              | 1.968736                | 0.055442  | 0.044905  |
| 10               | 6                | 0              | -3.119013               | -0.057863 | -0.974053 |
| 11               | 6                | 0              | -4.066535               | 0.276987  | -0.008967 |
| 12               | 6                | 0              | -3.777090               | 0.104567  | 1.347972  |
| 13               | 6                | 0              | -2.533779               | -0.400373 | 1.738047  |
| 14               | 6                | 0              | -1.563938               | -0.702963 | 0.783435  |
| 15               | 6                | 0              | 2.369231                | -1.370232 | 0.221984  |
| 16               | 8                | 0              | 1.576112                | -2.290064 | 0.245592  |
| 17               | 8                | 0              | 3.687499                | -1.625720 | 0.393848  |
| 18               | 1                | 0              | -0.434108               | 1.932001  | -1.482518 |
| 19               | 1                | 0              | 0.768550                | 3.737245  | -0.285731 |
| 20               | 1                | 0              | 2.741457                | 3.194725  | 1.137434  |
| 21               | 1                | 0              | 3.485352                | 0.849541  | 1.359193  |
| 22               | 1                | 0              | -3.337529               | 0.041587  | -2.033706 |
| 23               | 1                | 0              | -5.037794               | 0.655180  | -0.315881 |
| 24               | 1                | 0              | -4.524845               | 0.347083  | 2.098044  |
| 25               | 1                | 0              | -2.317914               | -0.562582 | 2.790685  |
| 26               | 1                | 0              | -0.607568               | -1.126324 | 1.071886  |
| 27               | 1                | 0              | 4.230202                | -0.843600 | 0.183461  |

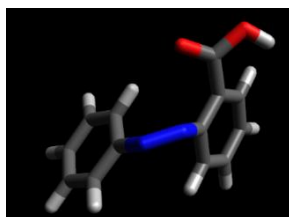

Visualization of calculated geometry of (*Z*)-**o-3a**

### 2.2.2. Molecular Orbitals-

#### Para

1) Molecular orbitals for the (*E*)-*p*-**3d** model system, HOMO on the left, LUMO on the right.

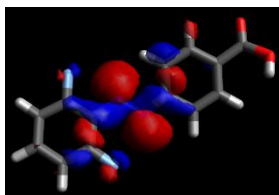

HOMO ( -6.474 eV)

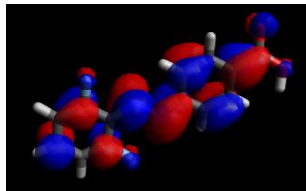

LUMO (-2.801 eV)

2) Molecular orbitals for the (*Z*)-*p*-**3d** model system, HOMO on the left, LUMO on the right.

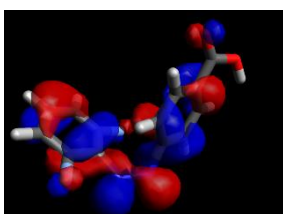

HOMO ( - 6.416 eV)

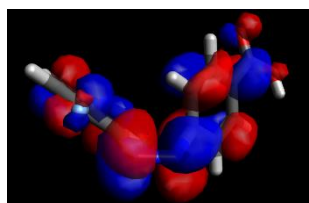

LUMO ( -2.639 eV)

3) Molecular orbitals for the (*E*)-*p*-**3c** model system, HOMO on the left, LUMO on the right.

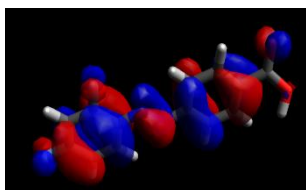

HOMO (-6.540 eV)

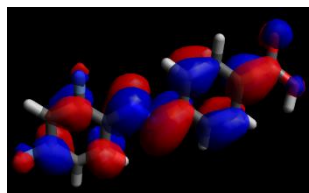

LUMO (-2.801 eV)

4) Molecular orbitals for the (*Z*)-*p*-**3c** model system, HOMO on the left, LUMO on the right.

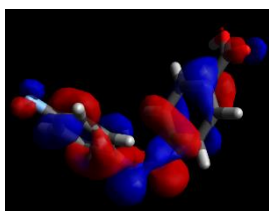

HOMO (-6.283 eV)

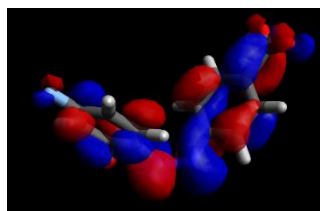

LUMO ( - 2.593 eV)

5) Molecular orbitals for the (*E*)-*p*-**3b** model system, HOMO on the left, LUMO on the right.

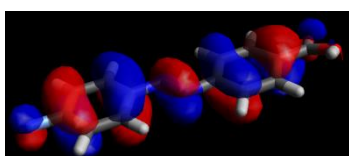

HOMO (-6.472 eV)

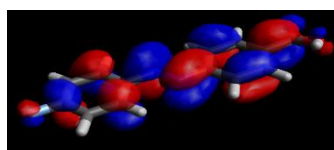

LUMO ( - 2.716 eV)

6) Molecular orbitals for the (Z)-*p*-**3b** model system, HOMO on the left, LUMO on the right.

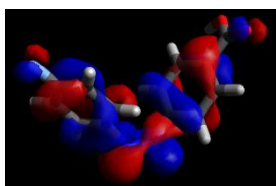

HOMO (-6.178 eV)

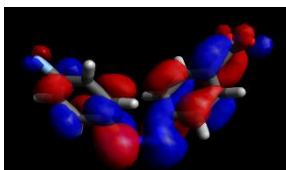

LUMO (- 2.480 eV)

7) Molecular orbitals for the (E)-*p*-**3a** model system, HOMO on the left, LUMO on the right.

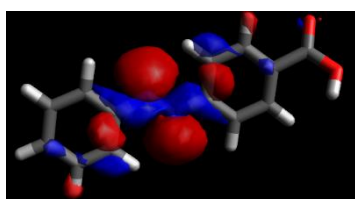

HOMO (- 6.487 eV)

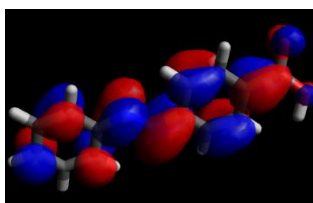

LUMO (- 2.705 eV)

8) Molecular orbitals for the (Z)-*p*-**3a** model system, HOMO on the left, LUMO on the right.

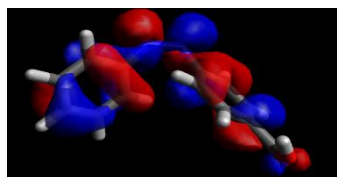

HOMO (-6. 170 eV)

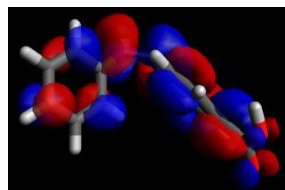

LUMO (-2.458 eV)

### Meta

1) Molecular orbitals for the (E)-*m*-**3d** model system, HOMO on the left, LUMO on the right.

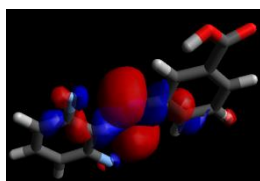

HOMO (-6.473 eV)

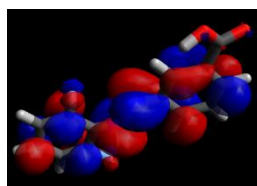

LUMO (-2.661 eV)

2) Molecular orbitals for the (Z)-*m*-**3d** model system, HOMO on the left, LUMO on the right.

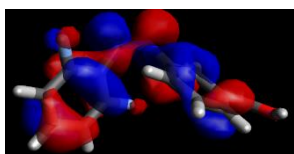

HOMO (- 6.369 eV)

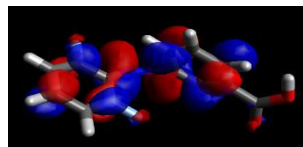

LUMO ( -2.523 eV)

3) Molecular orbitals for the (*E*)-*m*-**3c** model system, HOMO on the left, LUMO on the right.

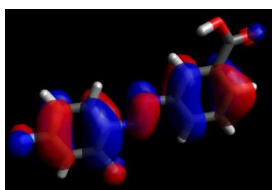

HOMO (- 6.512 eV)

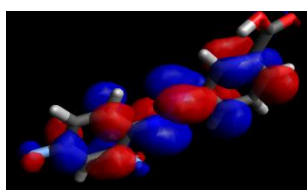

LUMO (-2.659 eV)

4) Molecular orbitals for the (*Z*)-*m*-**3c** model system, HOMO on the left, LUMO on the right.

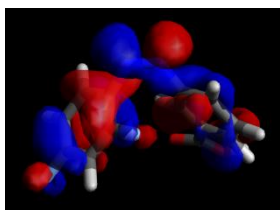

HOMO (-6.262 eV)

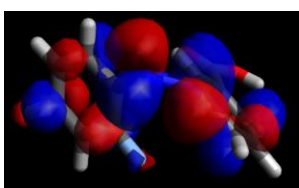

LUMO (-2.431 eV)

5) Molecular orbitals for the (*E*)-*m*-**3b** model system, HOMO on the left, LUMO on the right.

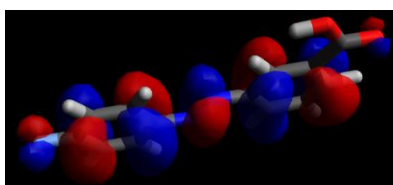

HOMO (-6.447 eV)

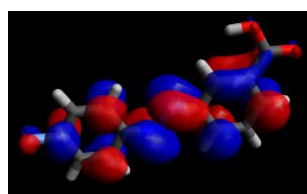

LUMO (-2.566 eV)

6) Molecular orbitals for the (*Z*)-*m*-**3b** model system, HOMO on the left, LUMO on the right.

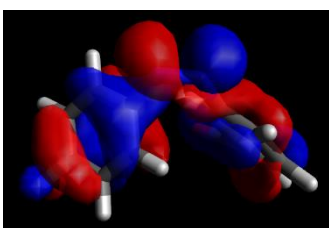

HOMO (- 6.140 eV)

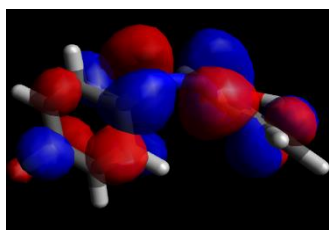

LUMO (-2.352 eV)

7) Molecular orbitals for the (*E*)-*m*-**3a** model system, HOMO on the left, LUMO on the right.

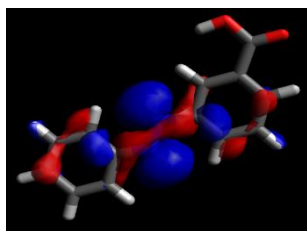

HOMO ( -6.490 eV)

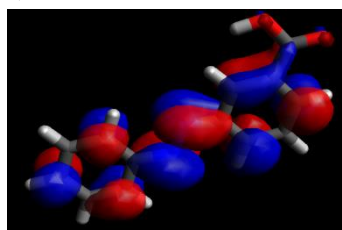

LUMO (-2.555 eV)



8) Molecular orbitals for the (Z)-*m*-**3a** model system, HOMO on the left, LUMO on the right.

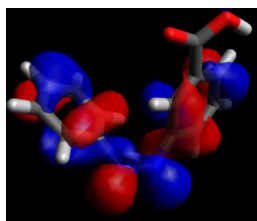

HOMO (-6.129 eV)

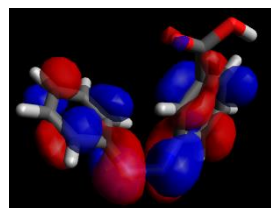

LUMO (-2.313 eV)

### Ortho

1) Molecular orbitals for the (*E*)-*o*-**3d** model system, HOMO on the left, LUMO on the right.

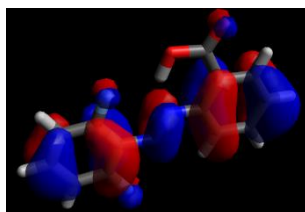

HOMO (-6.777 eV)

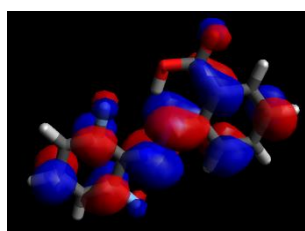

LUMO ( - 3.054 eV)

2) Molecular orbitals for the (Z)-*o*-**3d** model system, HOMO on the left, LUMO on the right.

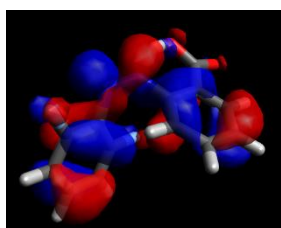

HOMO (-6.592 eV)

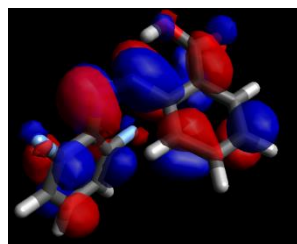

LUMO (-2.995 eV)

3) Molecular orbitals for the (*E*)-*o*-**3c** model system, HOMO on the left, LUMO on the right.

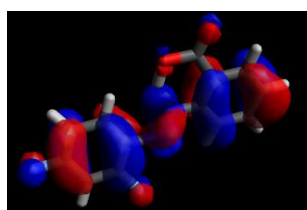

HOMO (-6.659 eV)

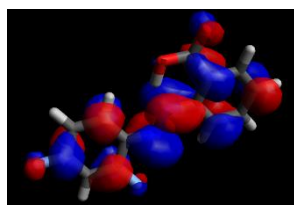

LUMO (-3.060 eV)

4) Molecular orbitals for the (Z)-*o*-**3c** model system, HOMO on the left, LUMO on the right.

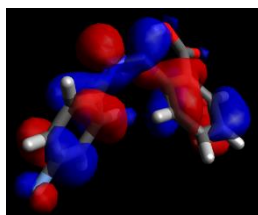

HOMO (-6.478 eV)

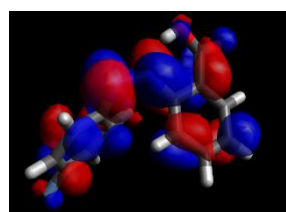

LUMO (-2.933 eV)

5) Molecular orbitals for the (*E*)-*o*-**3b** model system, HOMO on the left, LUMO on the right.

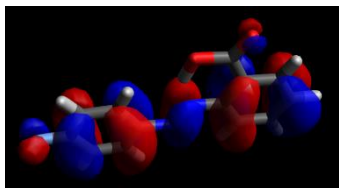

HOMO (-6.625 eV)

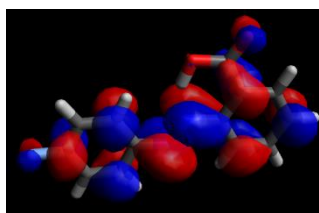

LUMO (-2.972 eV)

6) Molecular orbitals for the (*Z*)-*o*-**3b** model system, HOMO on the left, LUMO on the right.

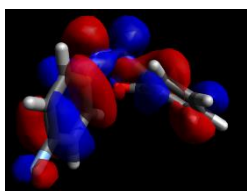

HOMO (-6.121 eV)

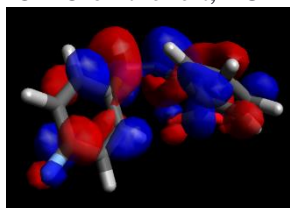

LUMO (-2.251 eV)

7) Molecular orbitals for (*E*)-*o*-**3a** model system, HOMO on the left, LUMO on the right.

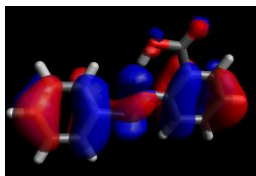

HOMO (-6.650 eV)

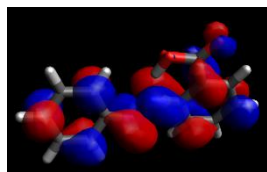

LUMO (-2.955 eV)

8) Molecular orbitals for the (*Z*)-*o*-**3a** model system, HOMO on the left, LUMO on the right.

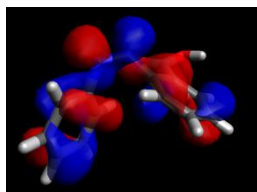

HOMO (-6.114 eV)

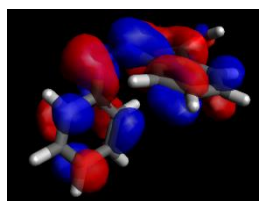

LUMO (-2.220 eV)

[1] Frisch, M.J.; Trucks, G.W.; Schlegel, H.B.; Scuseria, G.E.; Robb, M.A.; Cheeseman, J.R.; Montgomery, J.A.; Vreven, T.; Kudin, K.N.; Burant, J.C.; Millam, J.M.; Iyengar, S.S.; Tomasi, J.; Barone, V.; Mennucci, B.; Cossi, M.; Scalmani, G.; Rega, N.; Petersson, G.A.; Nakatsuji, H.; Hada, M.; Ehara, M.; Toyota, K.; Fukuda, R.; Hasegawa, J.; Ishida, M.; Nakajima, T.; Honda, Y.; Kitao, O.; Nakai, H.; Klene, M.; Li, X.; Knox, J.E.; Hratchian, H.P.; Cross, J.B.; Bakken, V.; Adamo, C.; Jaramillo, J.; Gomperts, R.; Stratmann, R.E.; Yazyev, O.; Austin, A.J.; Cammi, R.; Pomelli, C.; Ochterski, J.W.; Ayala, P.Y.; Morokuma, K.; Voth, G.A.; Salvador, P.; Dannenberg, J.J.; Zakrzewski, V.G.; Dapprich, S.; Daniels, A.D.; Strain, M.C.; Farkas, O.; Malick, D.K.; Rabuck, A.D.; Raghavachari, K.; Foresman, J.B.; Ortiz, J.V.; Cui, Q.; Baboul, A.G.; Clifford, S.; Cioslowski, J.; Stefanov, B.B.; Liu, G.; Liashenko, A.; Piskorz, P.; Komaromi, I.; Martin, R.L.; Fox, D.J.; Keith, T.; Al-Laham, M.A.; Peng, C.Y.; Nanayakkara, A.; Challacombe, M.; Gill, P.M.W.; Johnson, B.; Chen, W.; Wong, M.W.; Gonzalez, C.; Pople, J.A.; Gaussian Inc., Wallingford, CT, 2004 (Gaussian 03, Revision E.01).

[2] Tomasi, J.; Mennucci, B.; Cammi, R. Quantum Mechanical Continuum Solvation Models. *Chem. Rev.* **2005**, *105*, 2999–3094; doi:10.1021/CR9904009.

[3] Bagnato, J.D.; Eilers, A.L.; Horton, R.A.; Grissom, C.B. Synthesis and Characterization of a Cobalamin-colchicine Conjugate as a Novel Tumor-targeted Cytotoxin. *J. Org. Chem.* **2004**, *69*, 8987–8996; doi:10.1021/JO049953W.

[4] Borowiak, M.; Borowiak, M.; Nahaboo, W.; Reynders, M.; Nekolla, K.; Jalinot, P.; Hasserodt, J.; Rehberg, M.; Delattre, M.; Zahler, S. Photoswitchable Inhibitors of Microtubule Dynamics Optically Control Mitosis and Cell Death. *Cell* **2015**, *162*, 403–411; doi:10.1016/J.CELL.2015.06.049.

[5] Sailer, A.; Ermer, F.; Kraus, Y.; Lutter, F.H.; Donau, C.A.; Bremerich, M.; Ahlfeld, J.; Thorn-Seshold, O. Hemithioindigos for Cellular Photopharmacology: Desymmetrised Molecular Switch Scaffolds Enabling Design Control over the Isomer-dependency of Potent Antimitotic Bioactivity. *ChemBioChem* **2019**, *20*, 1305–1314; doi:10.1002/CBIC.201800752.

[6] Sailer, A.; Meiring, J.C.M.; Heise, C.; Pettersson, L.N.; Akhmanova, A.; Thorn-Seshold, J.; Thorn-Seshold, O. Pyrrole Hemithioindigo Antimitotics with Near-quantitative Bidirectional Photoswitching Photocontrol Cellular Microtubule Dynamics with Single-cell Precision. *Angew. Chem. Int. Ed.* **2021**, *60*, 23695–23704; doi:10.1002/ANIE.202104794.

[7] Gao, L.; Meiring, J.C.M.; Kraus, Y.; Wranik, M.; Weinert, T.; Pritzl, S.D.; Bingham, R.; Ntoulou, E.; Jansen, K.I.; Olieric, N. A Robust, Gfp-orthogonal Photoswitchable Inhibitor Scaffold Extends Optical Control over the Microtubule Cytoskeleton. *Cell Chem. Biol.* **2021**, *28*, 228–241; doi:10.1016/J.CHEMBIOL.2020.11.007.

[8] Gao, L.; Meiring, J.C.; Varady, A.; Ruider, I.E.; Heise, C.; Wranik, M.; Velasco, C.D.; Taylor, J.A.; Terni, B.; Weinert, T.; Standfuss, J.; Cabernard, C.C.; Llobet, A.; Steinmetz, M.O.; Bausch, A.R.; Distel, M.; Thorn-Seshold, J.; Akhmanova, A. Thorn-Seshold, O. In vivo photocontrol of microtubule dynamics and integrity, migration and mitosis, by the potent GFP-imaging-compatible photoswitchable reagents SBTubA4P and SBTub2M. *J. Am. Chem. Soc.* **2022**, *144*, 5614–5628; doi:10.1021/jacs.2c01020.
